# Supplementary material
Source: MDPI journal article supplement (https://www.mdpi.com/1099-4300/22/7/726)

dt=5/120 s

**N = 2**

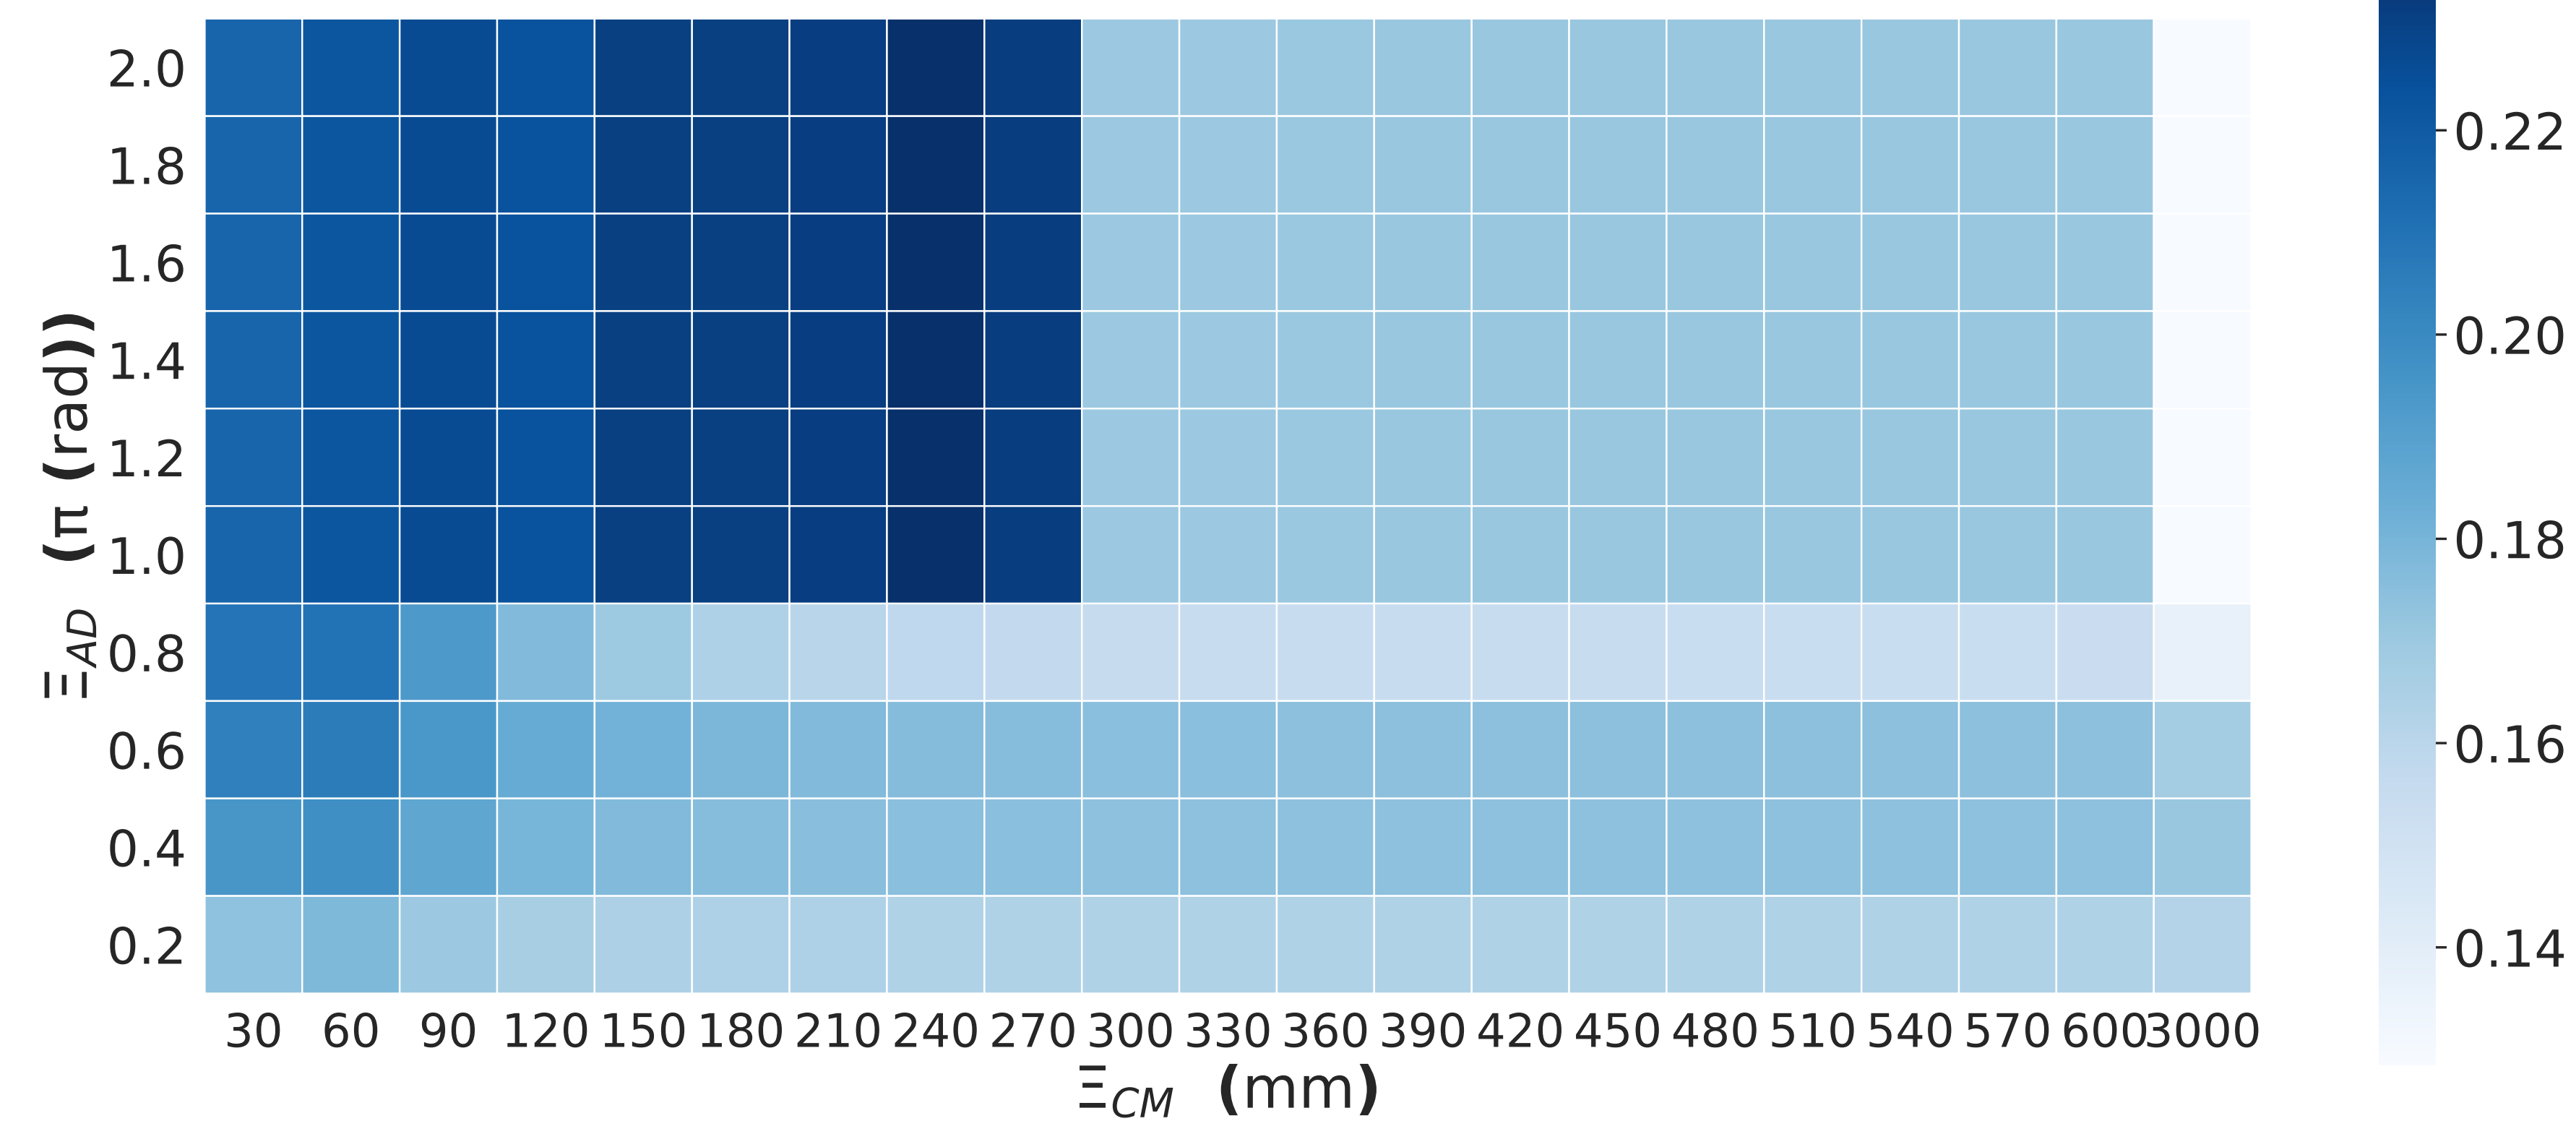

**N = 3**

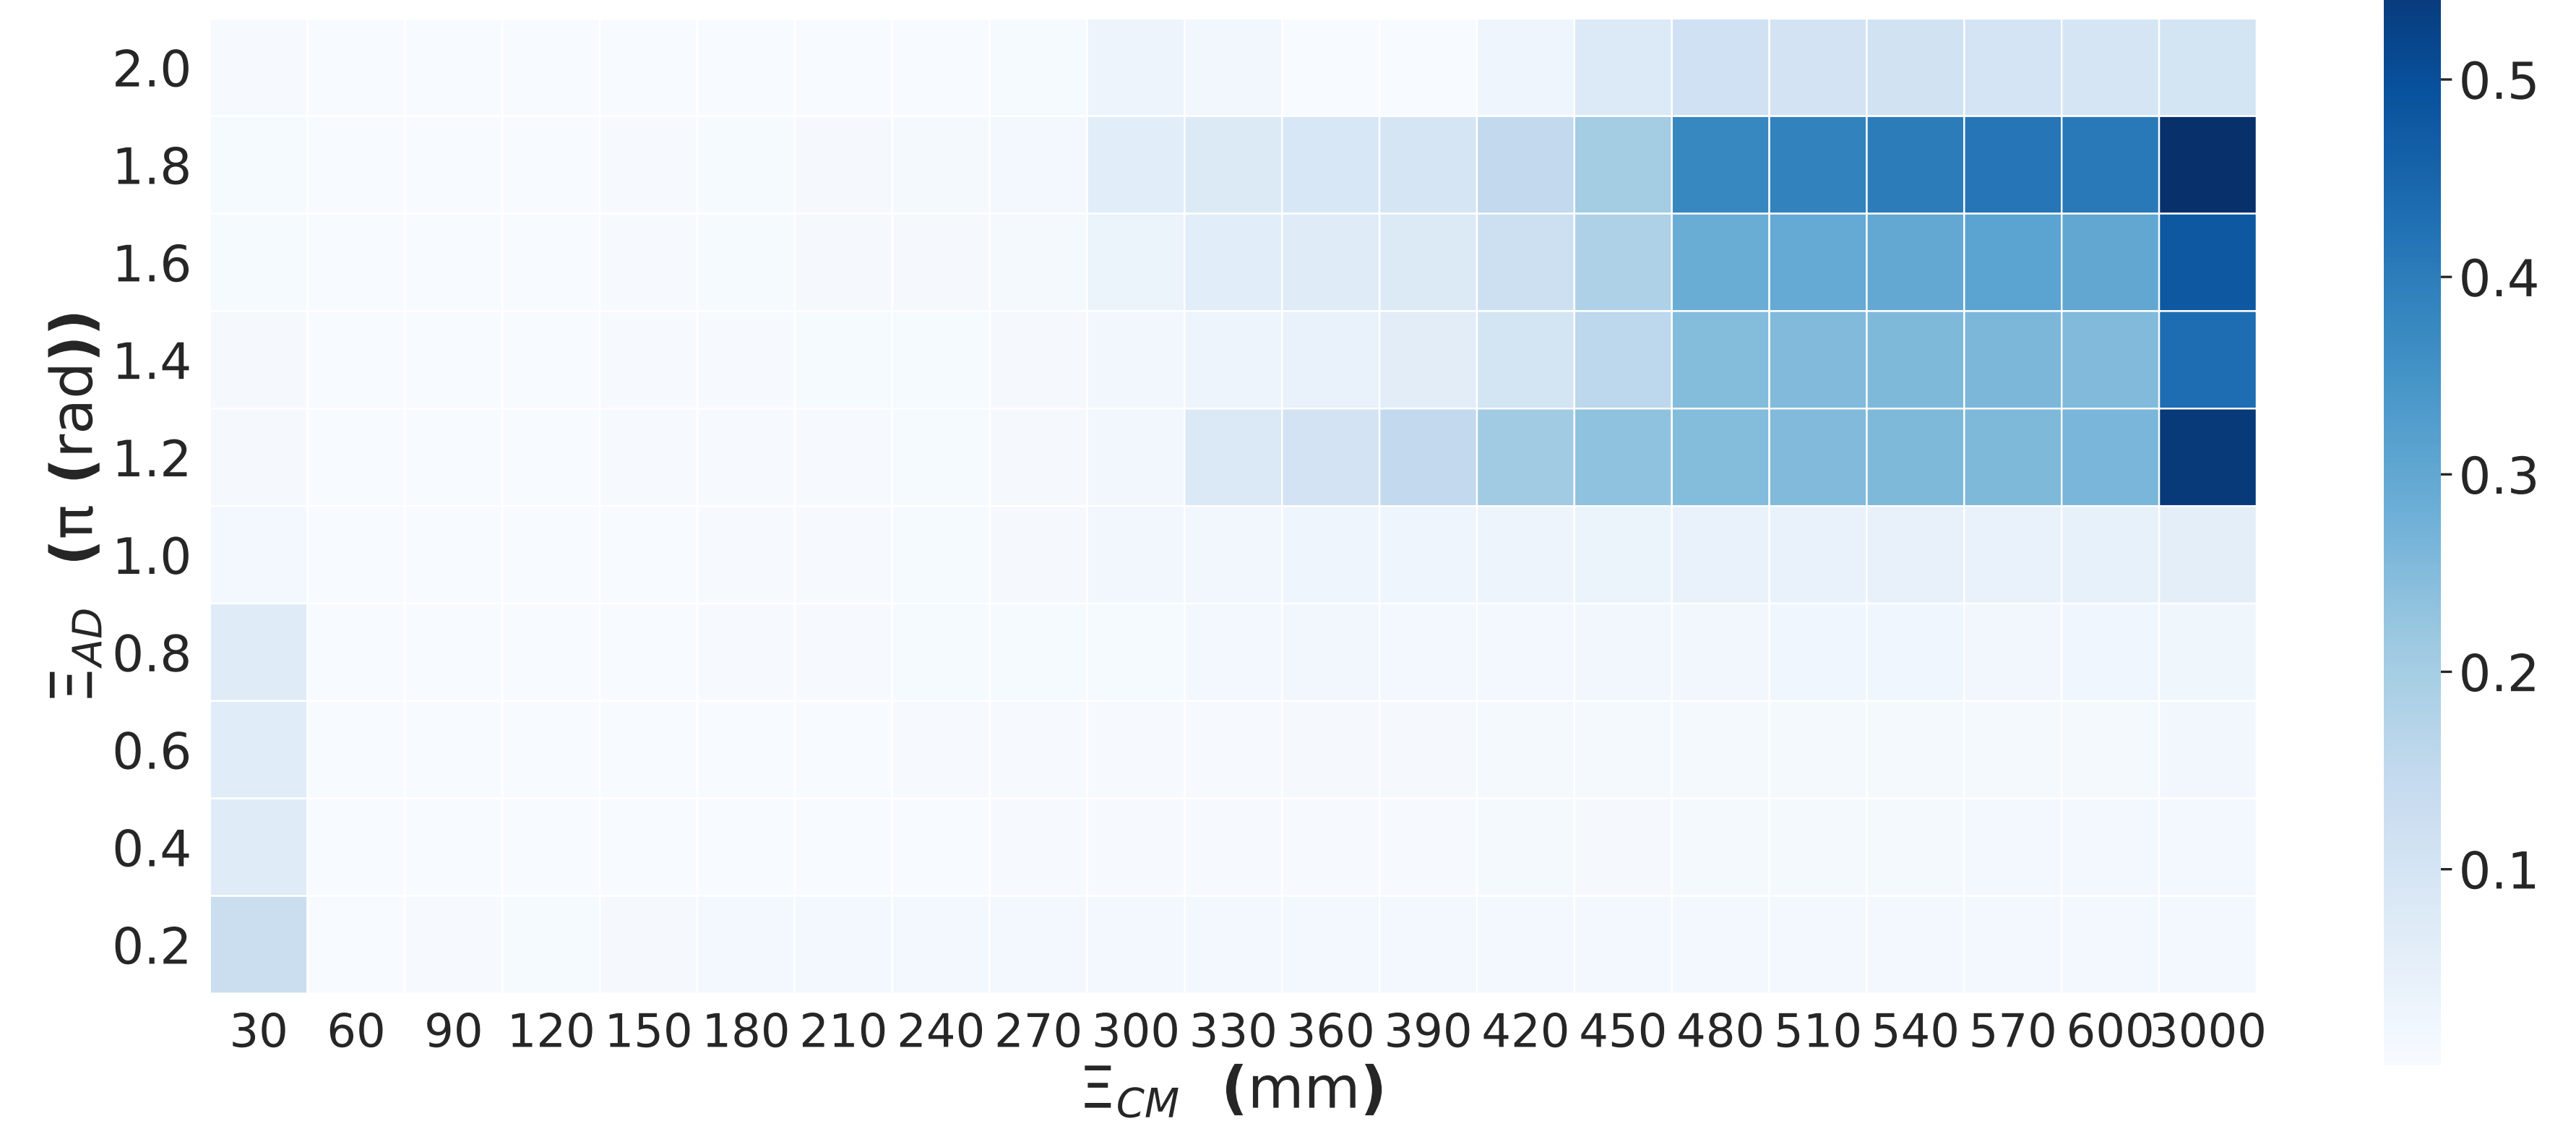

**N = 4**

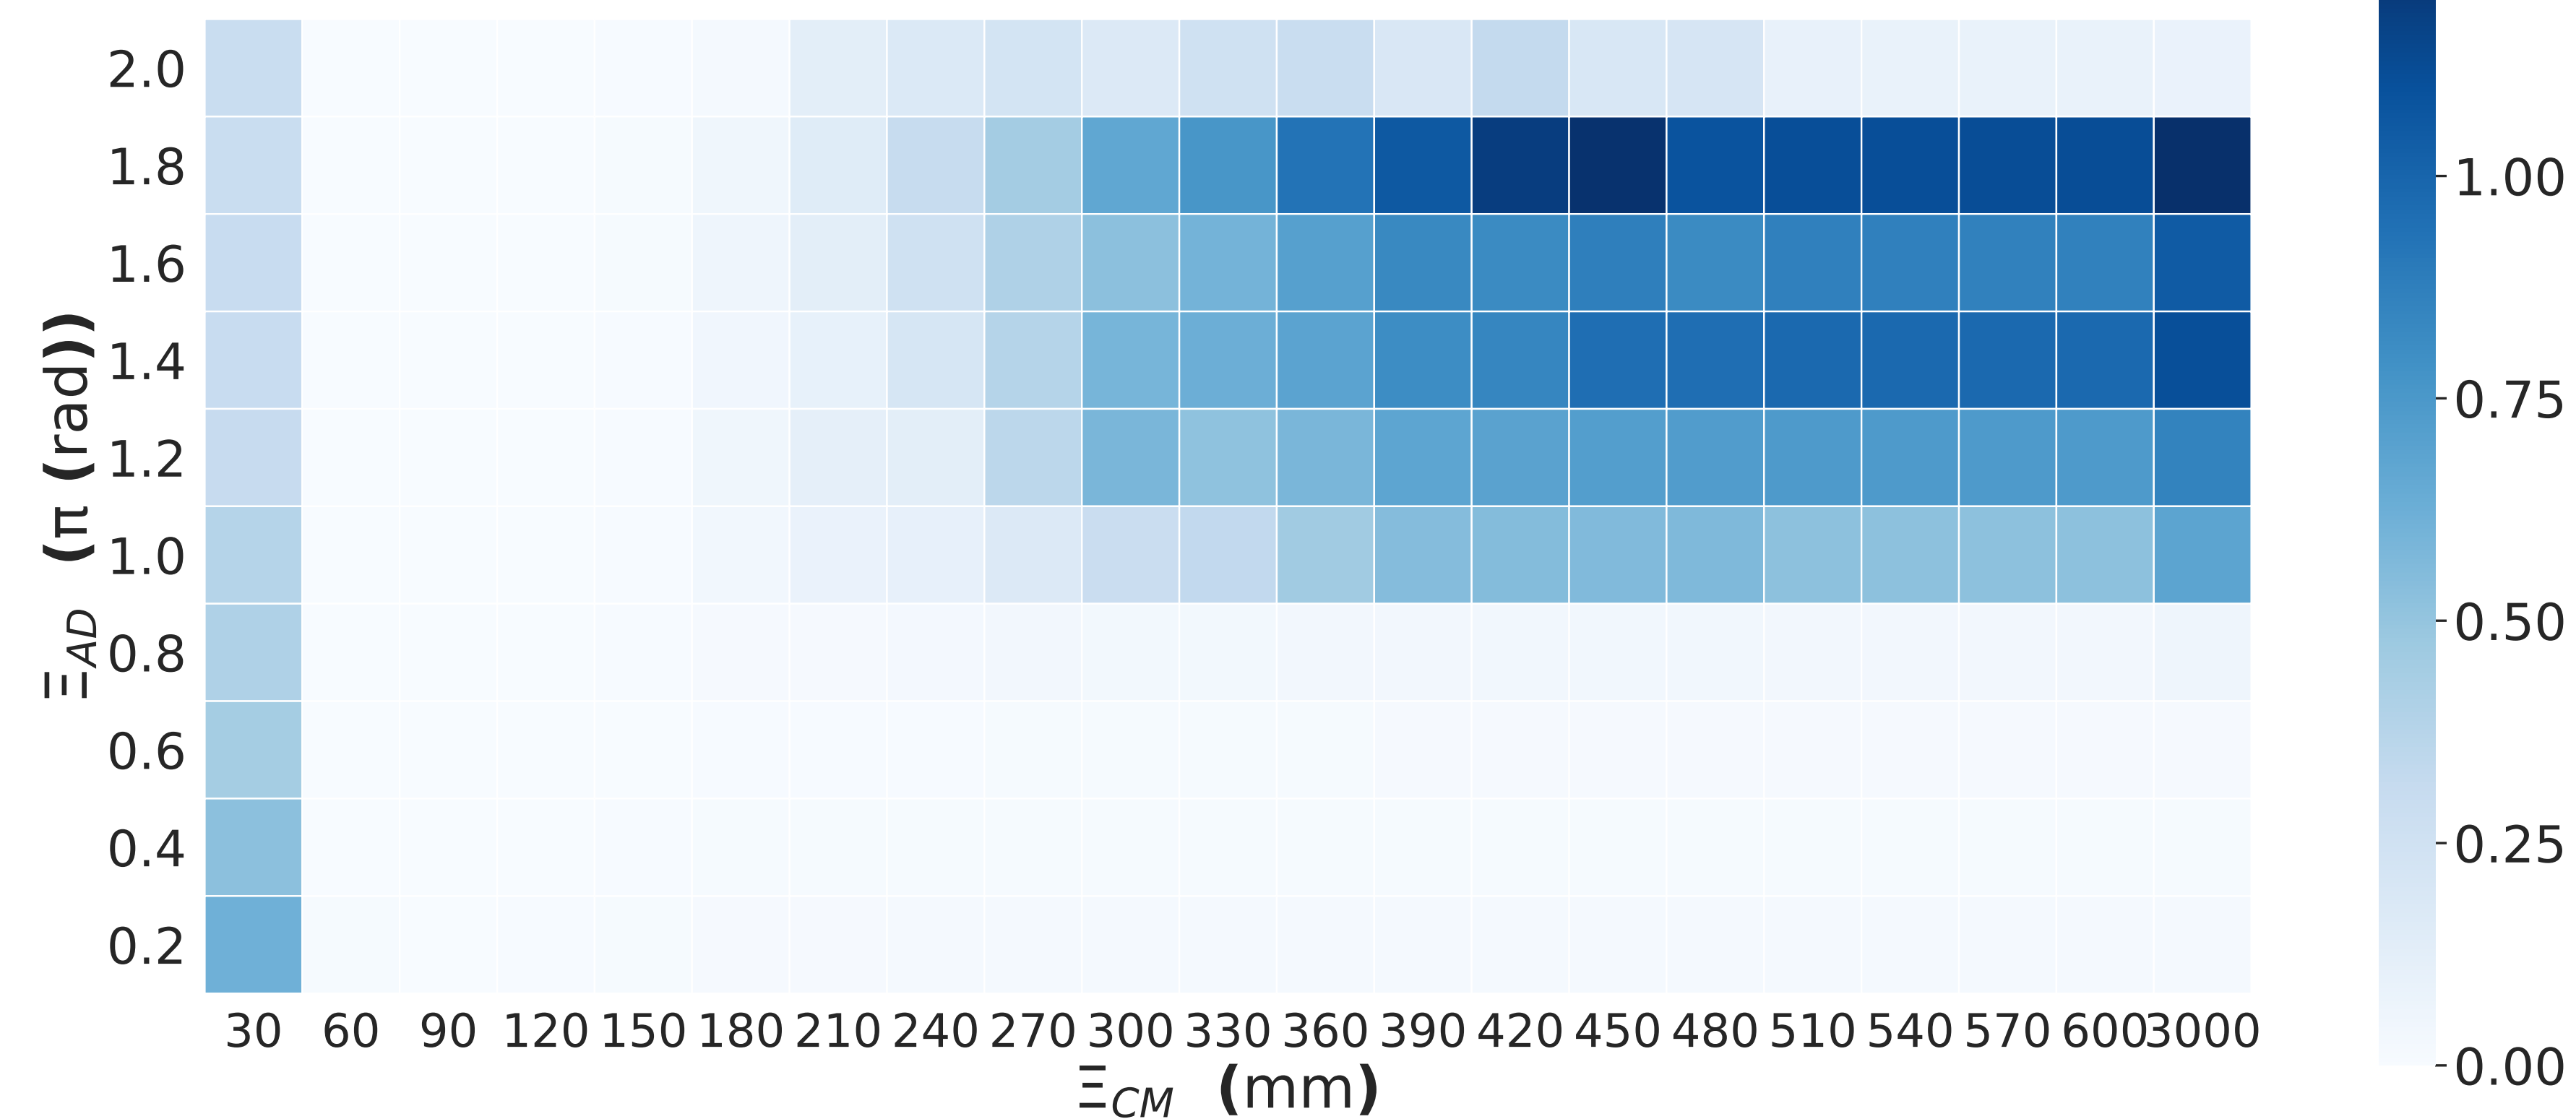

**N = 5**

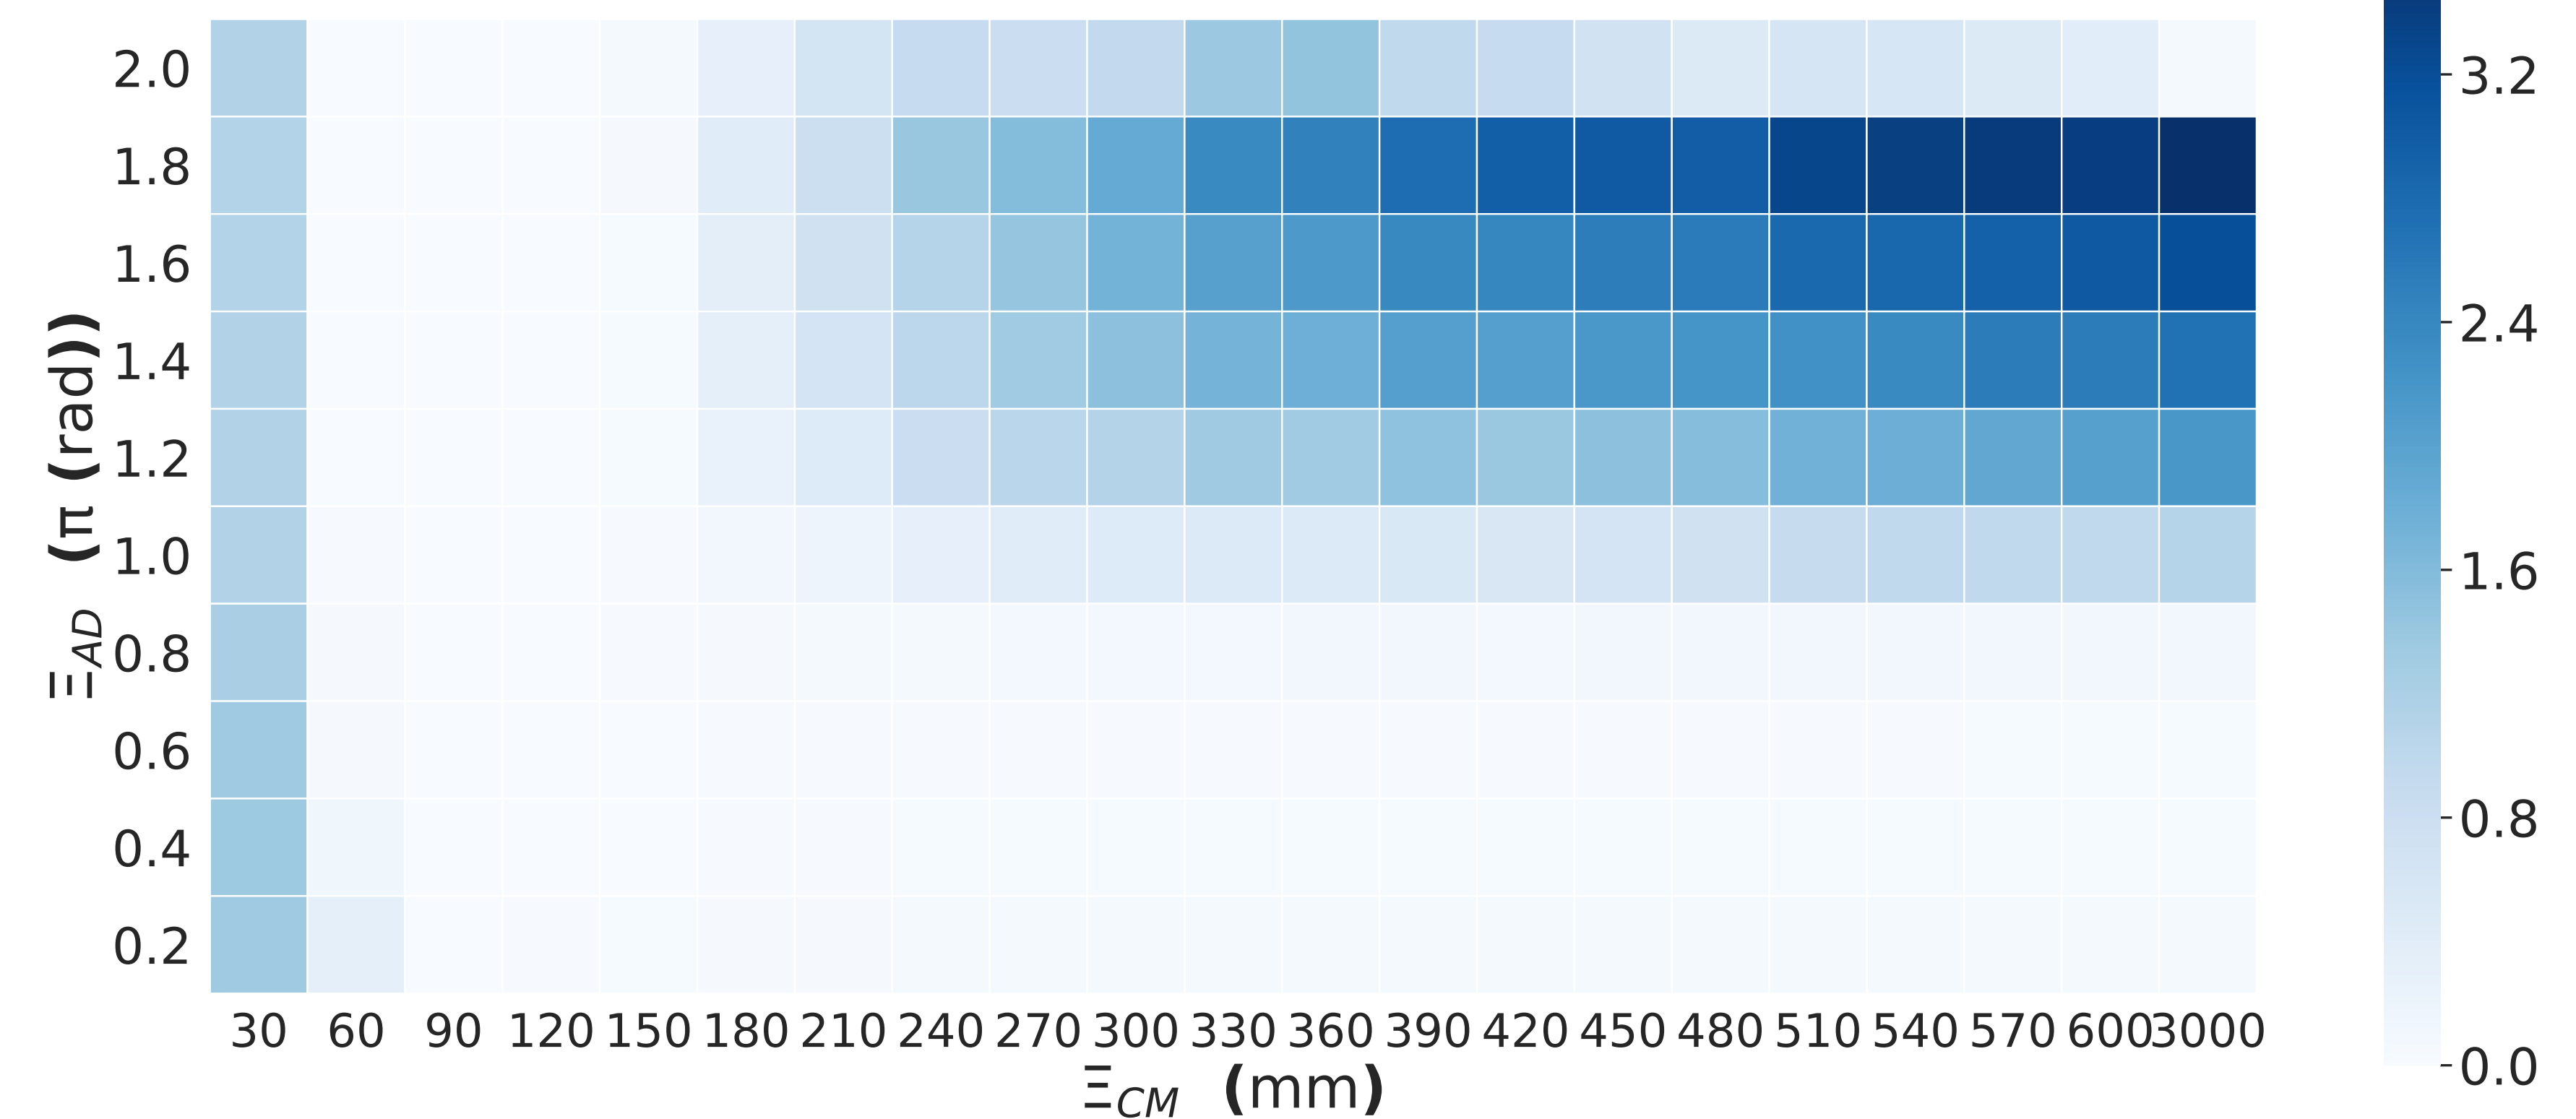

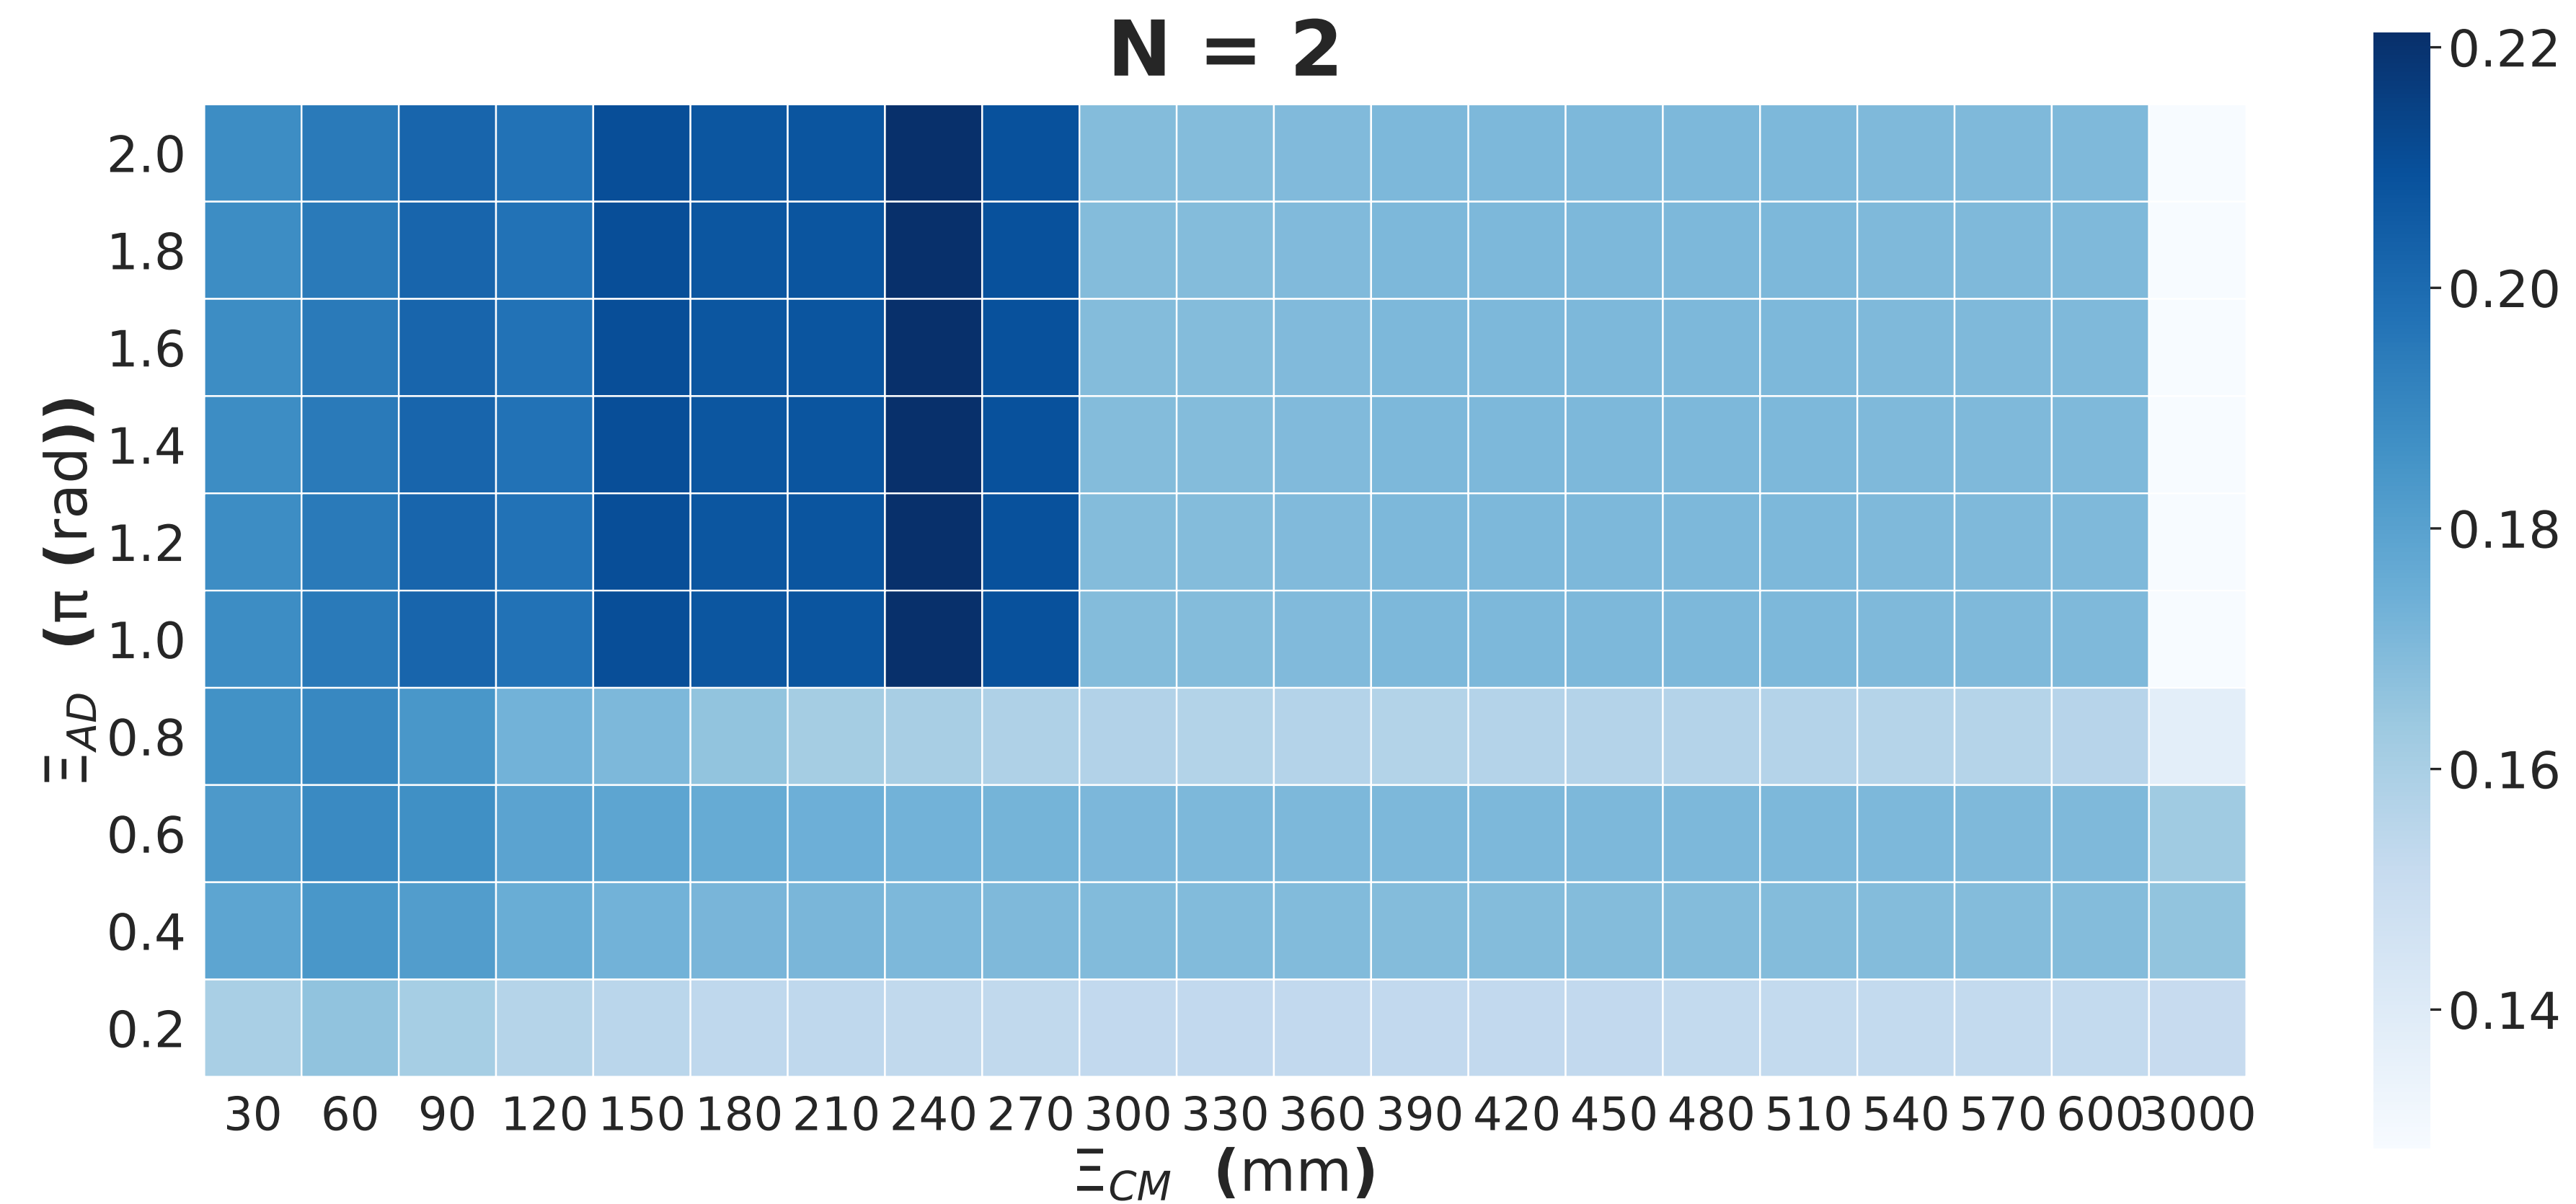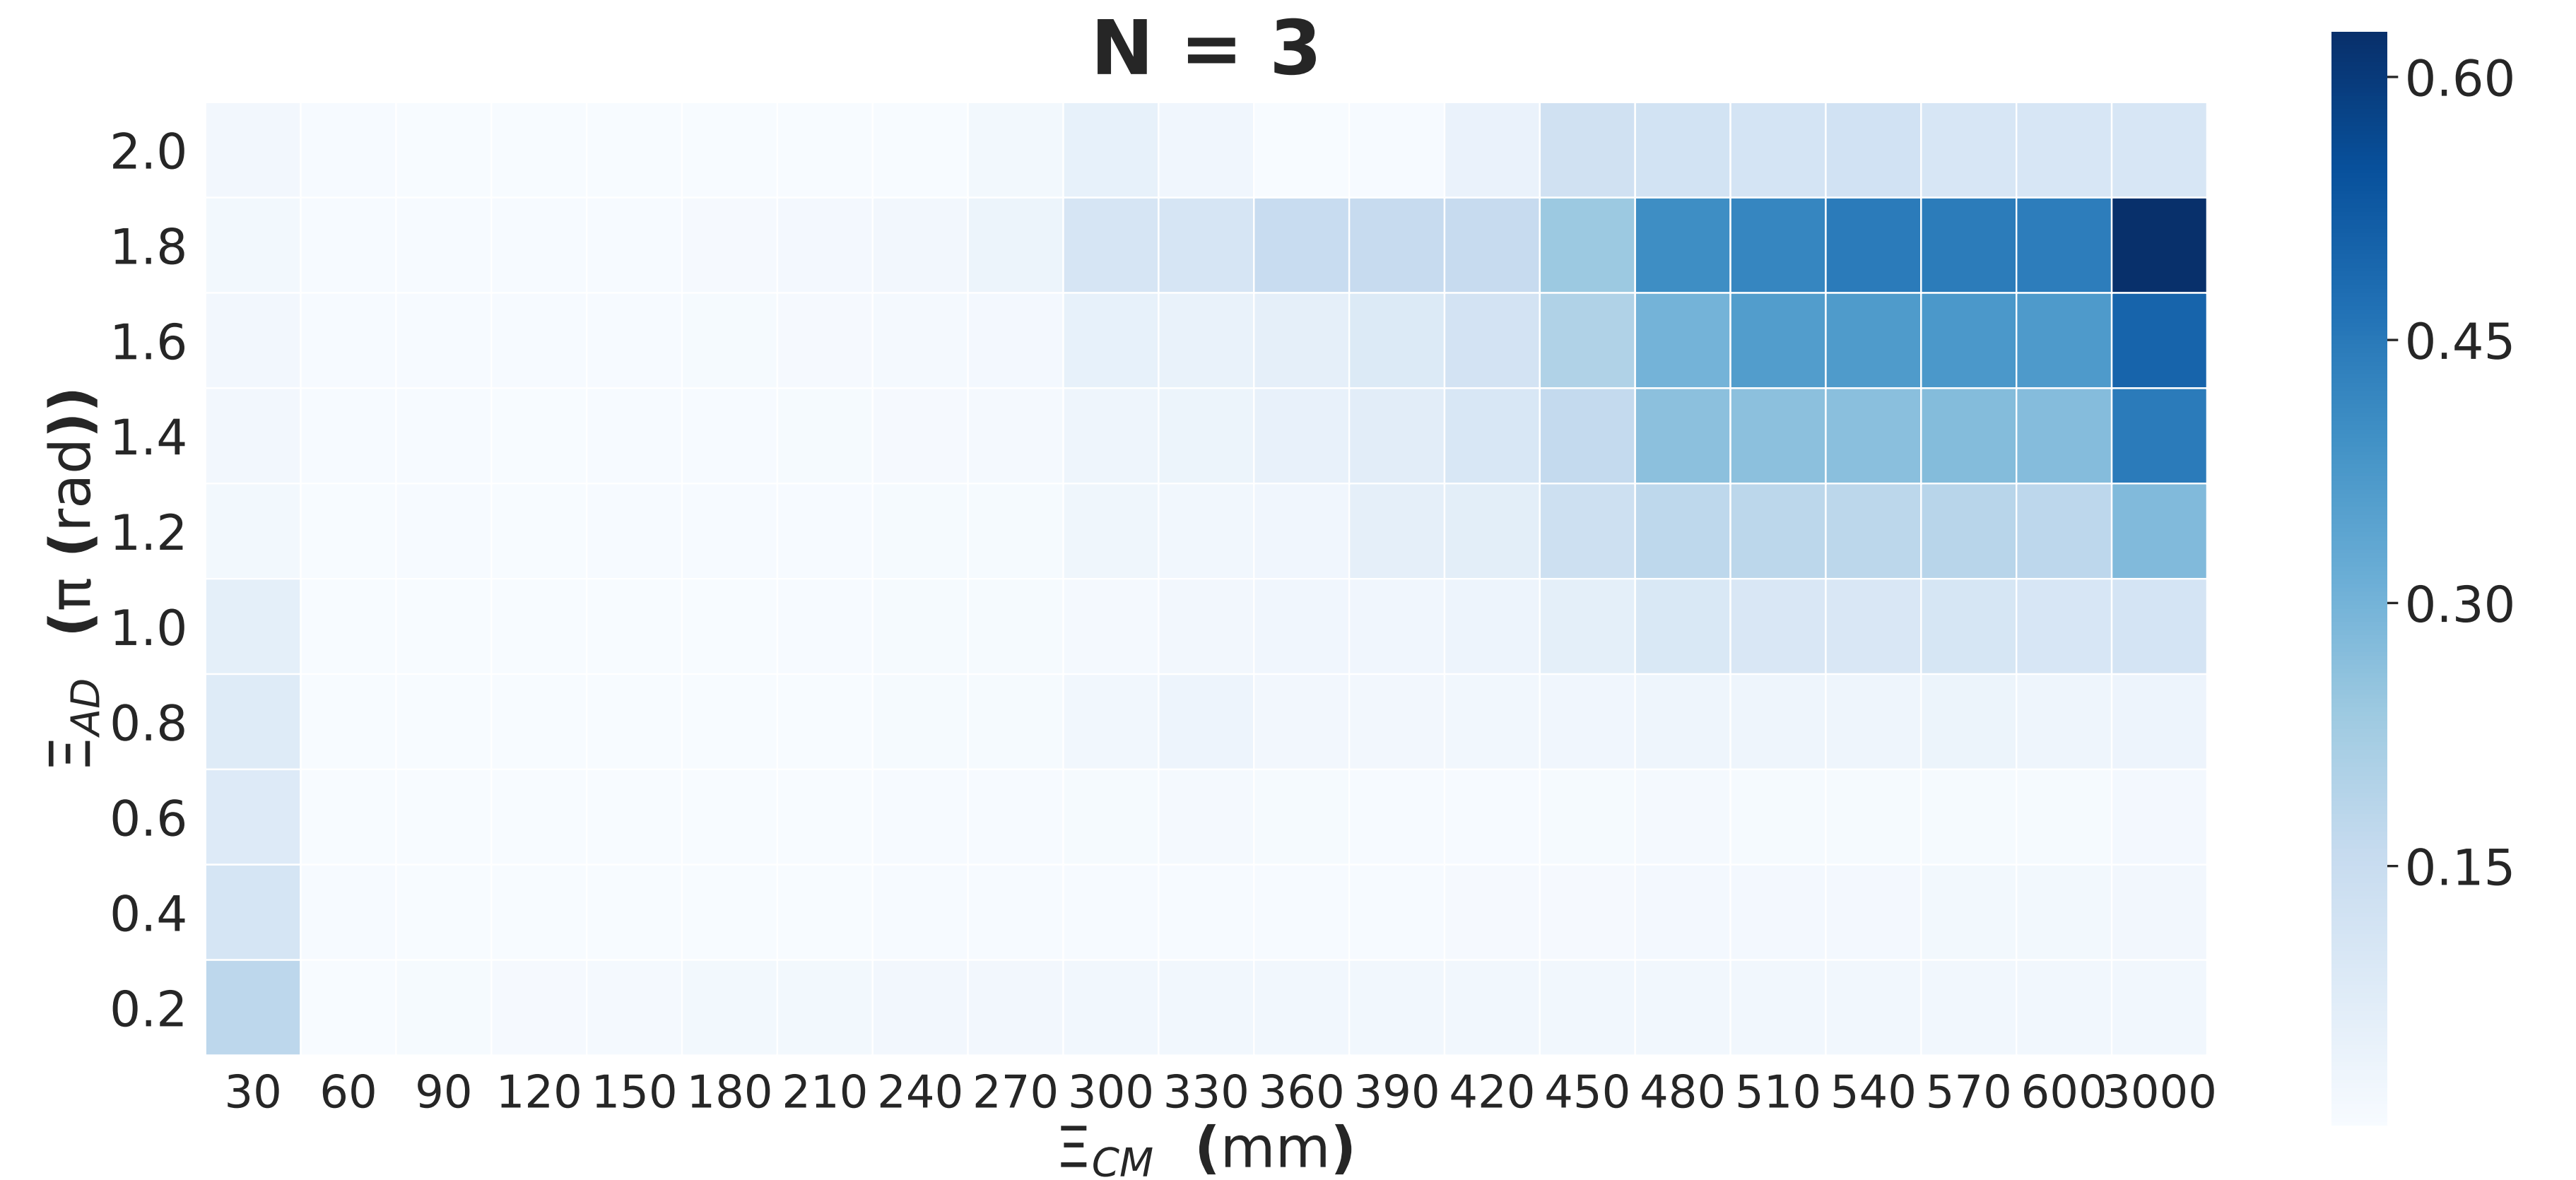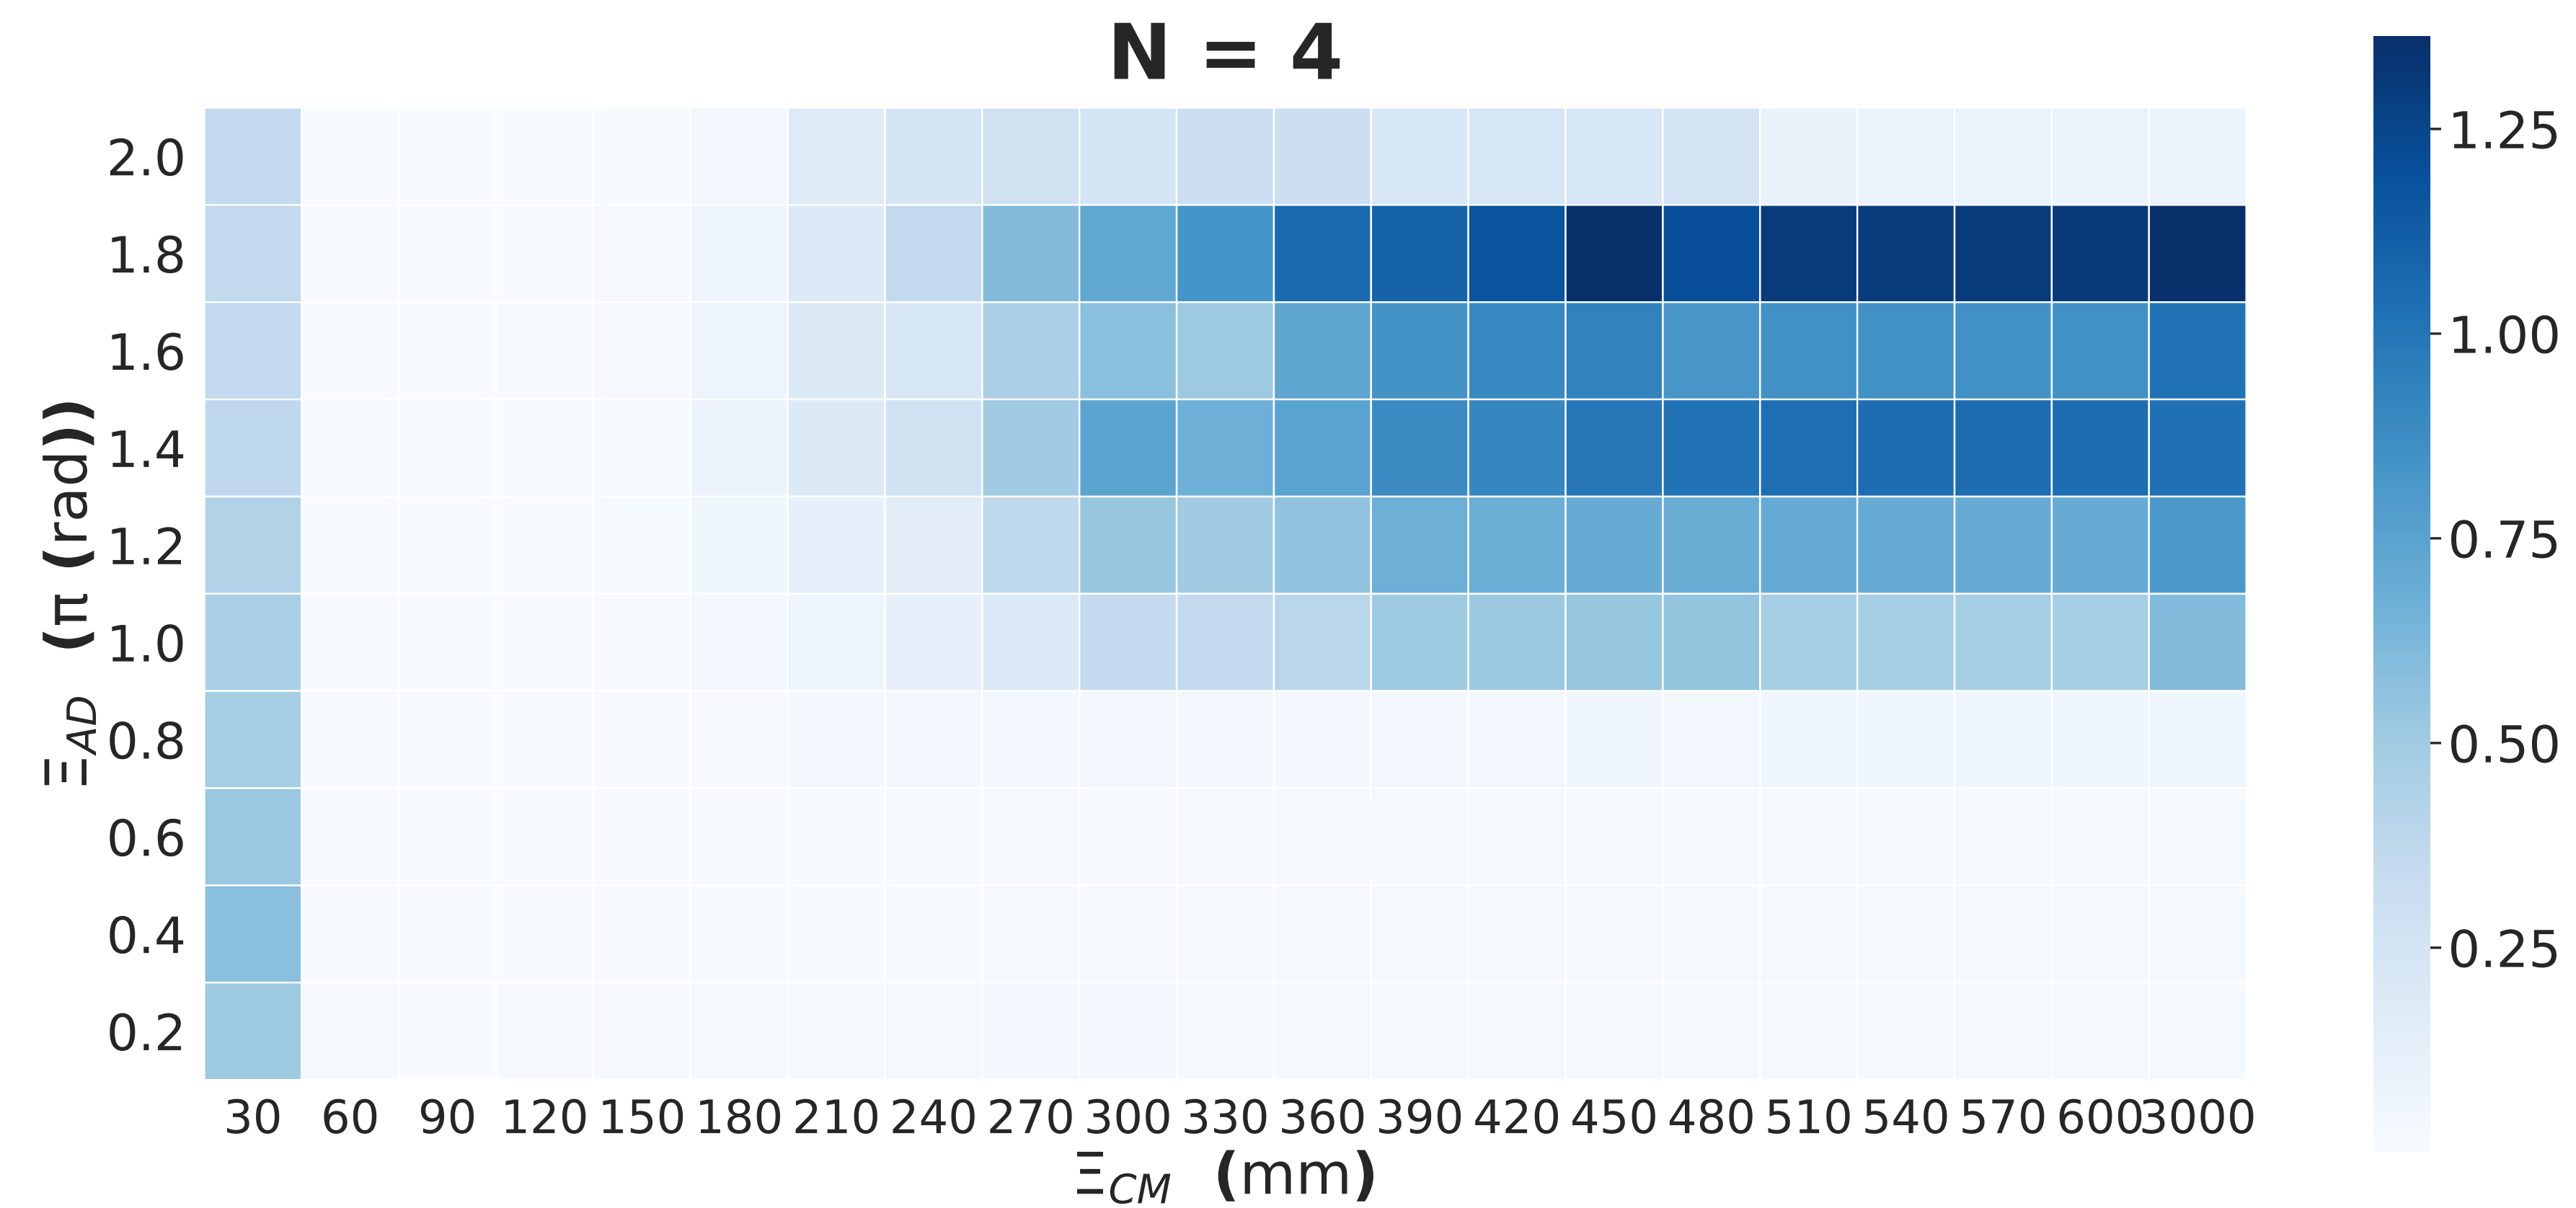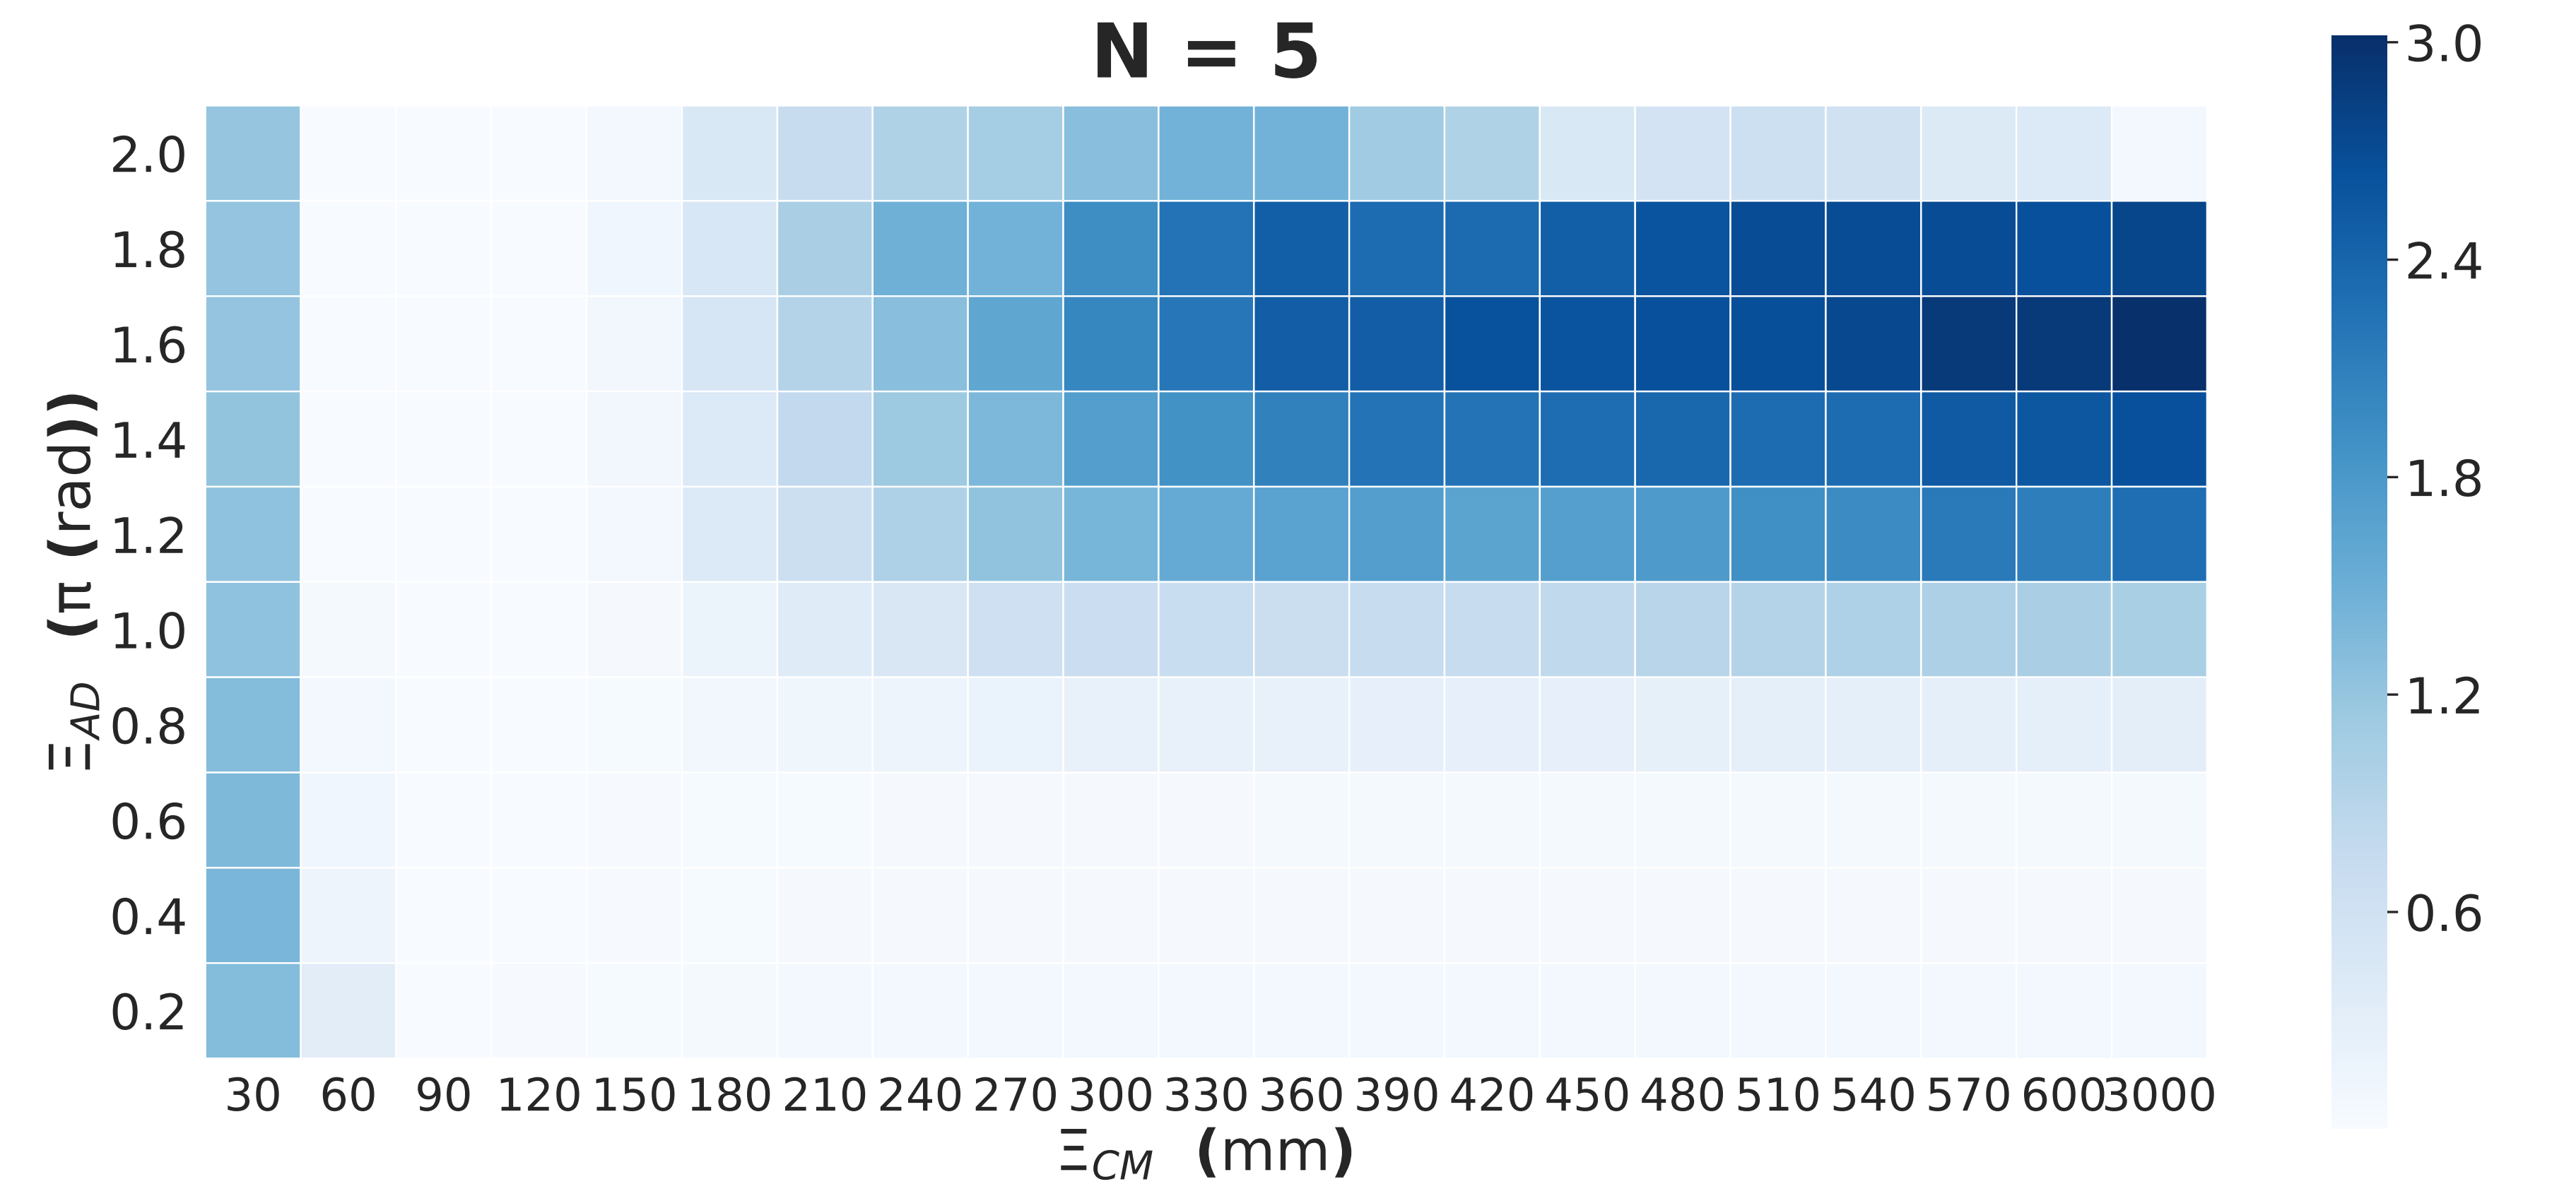

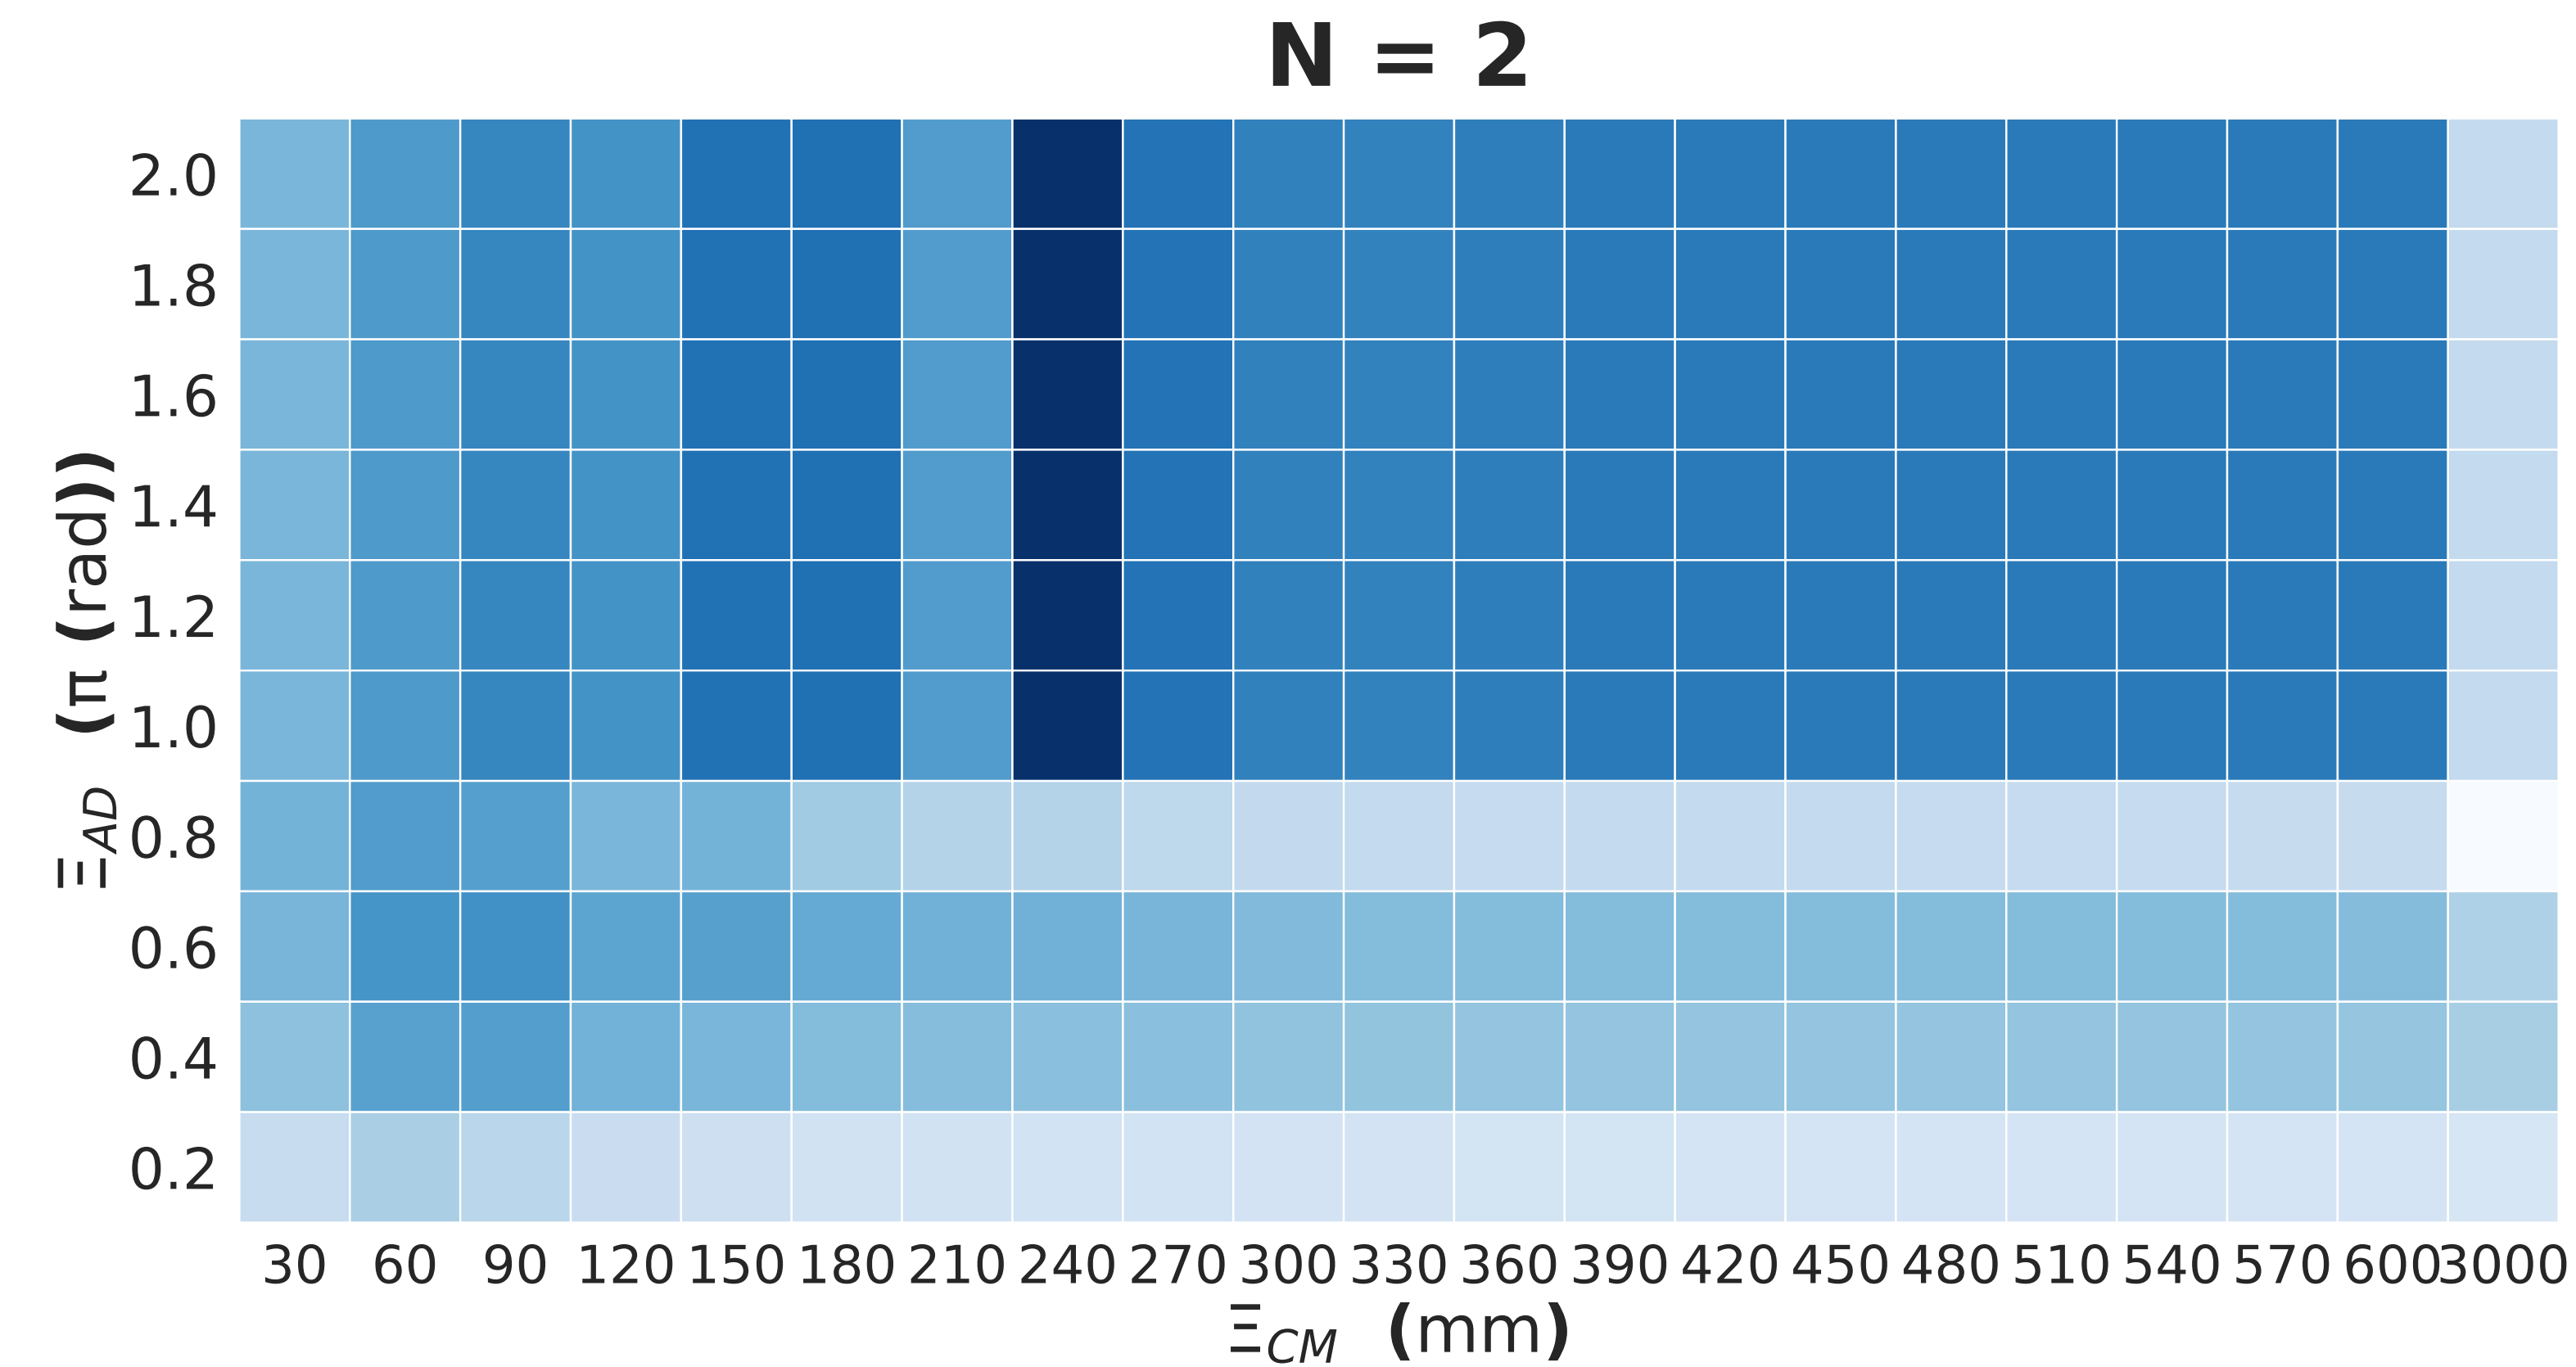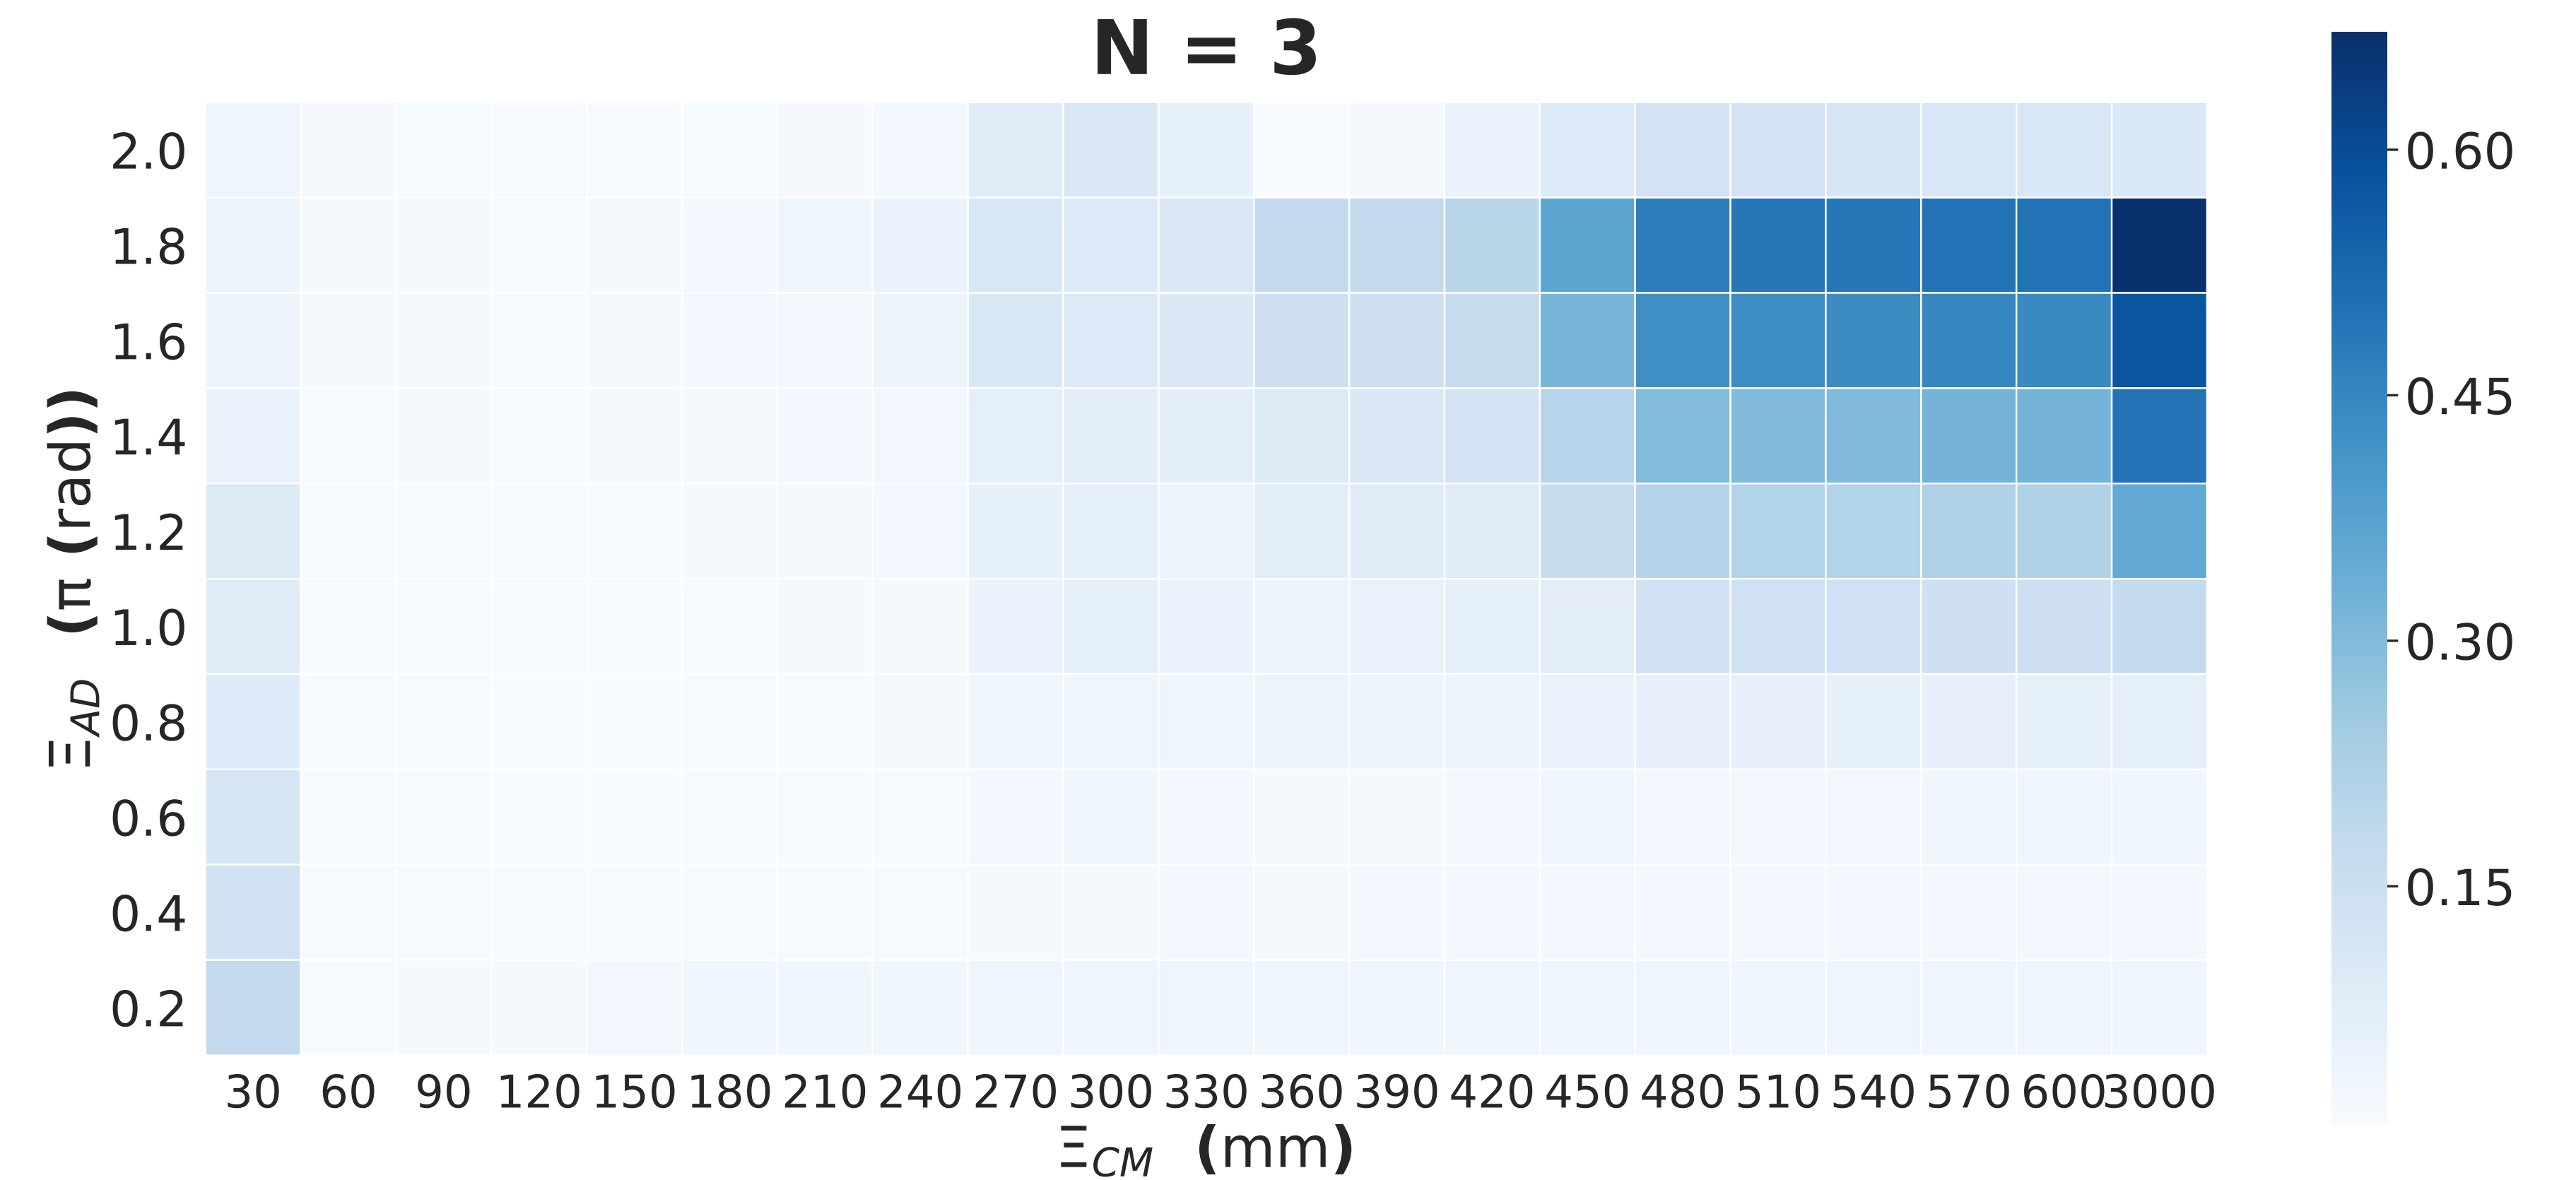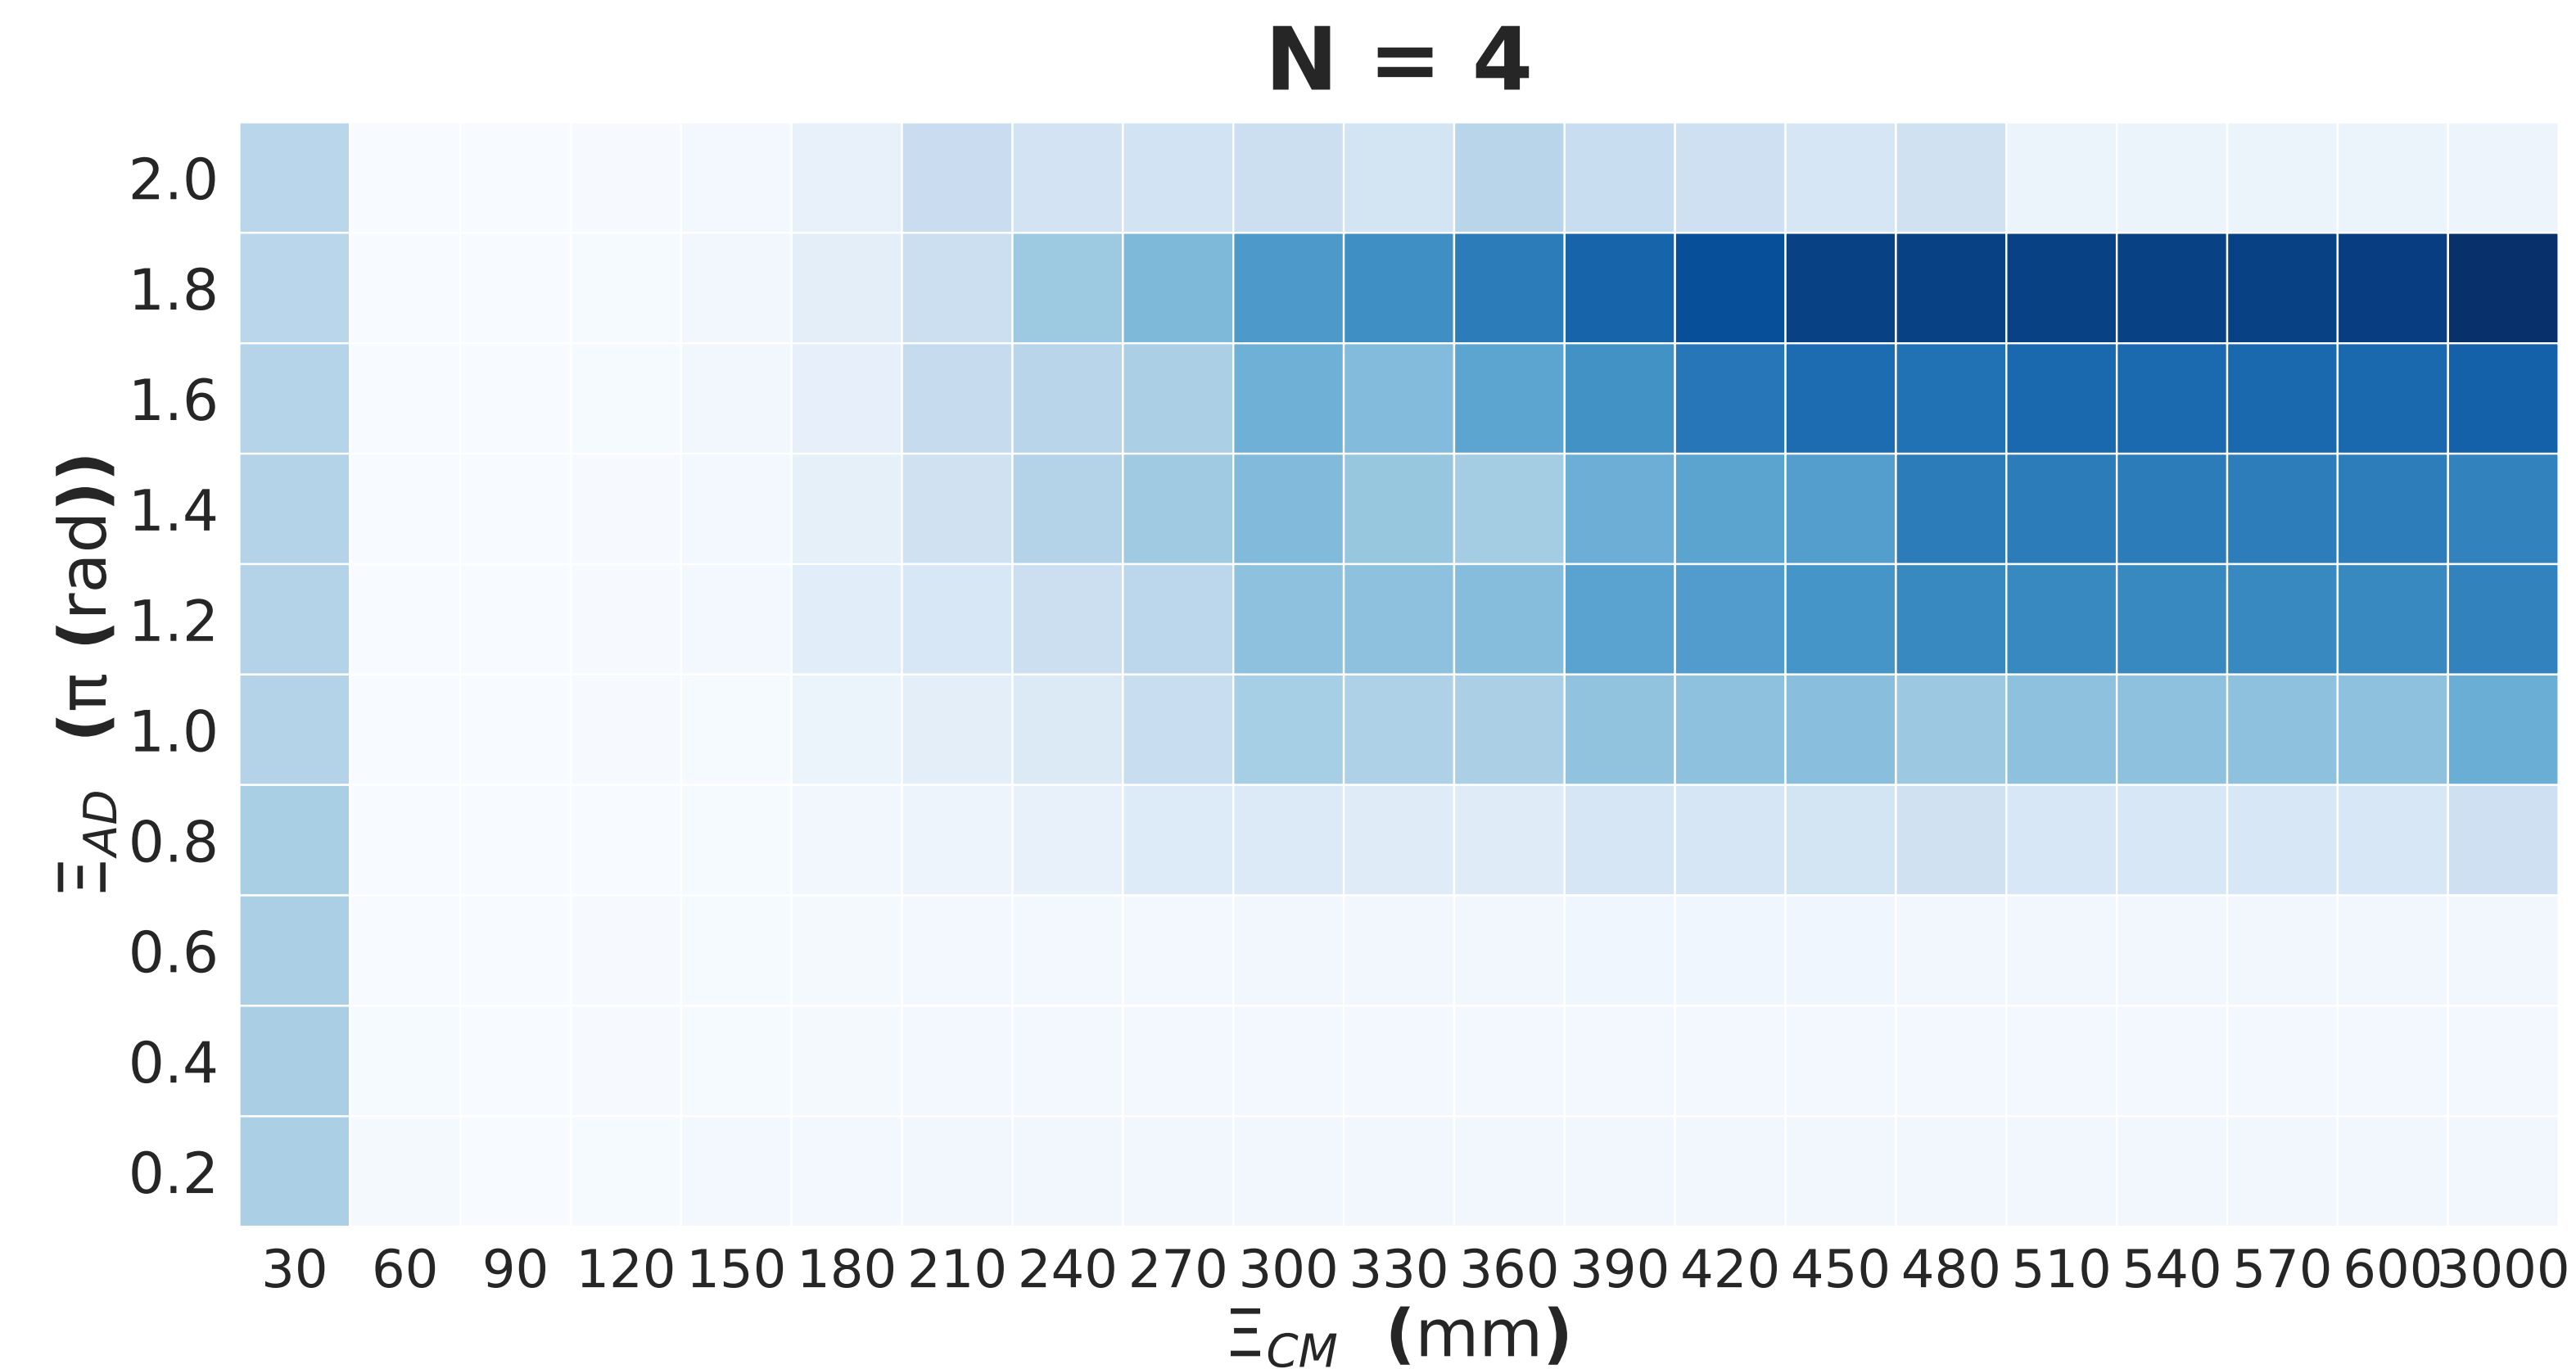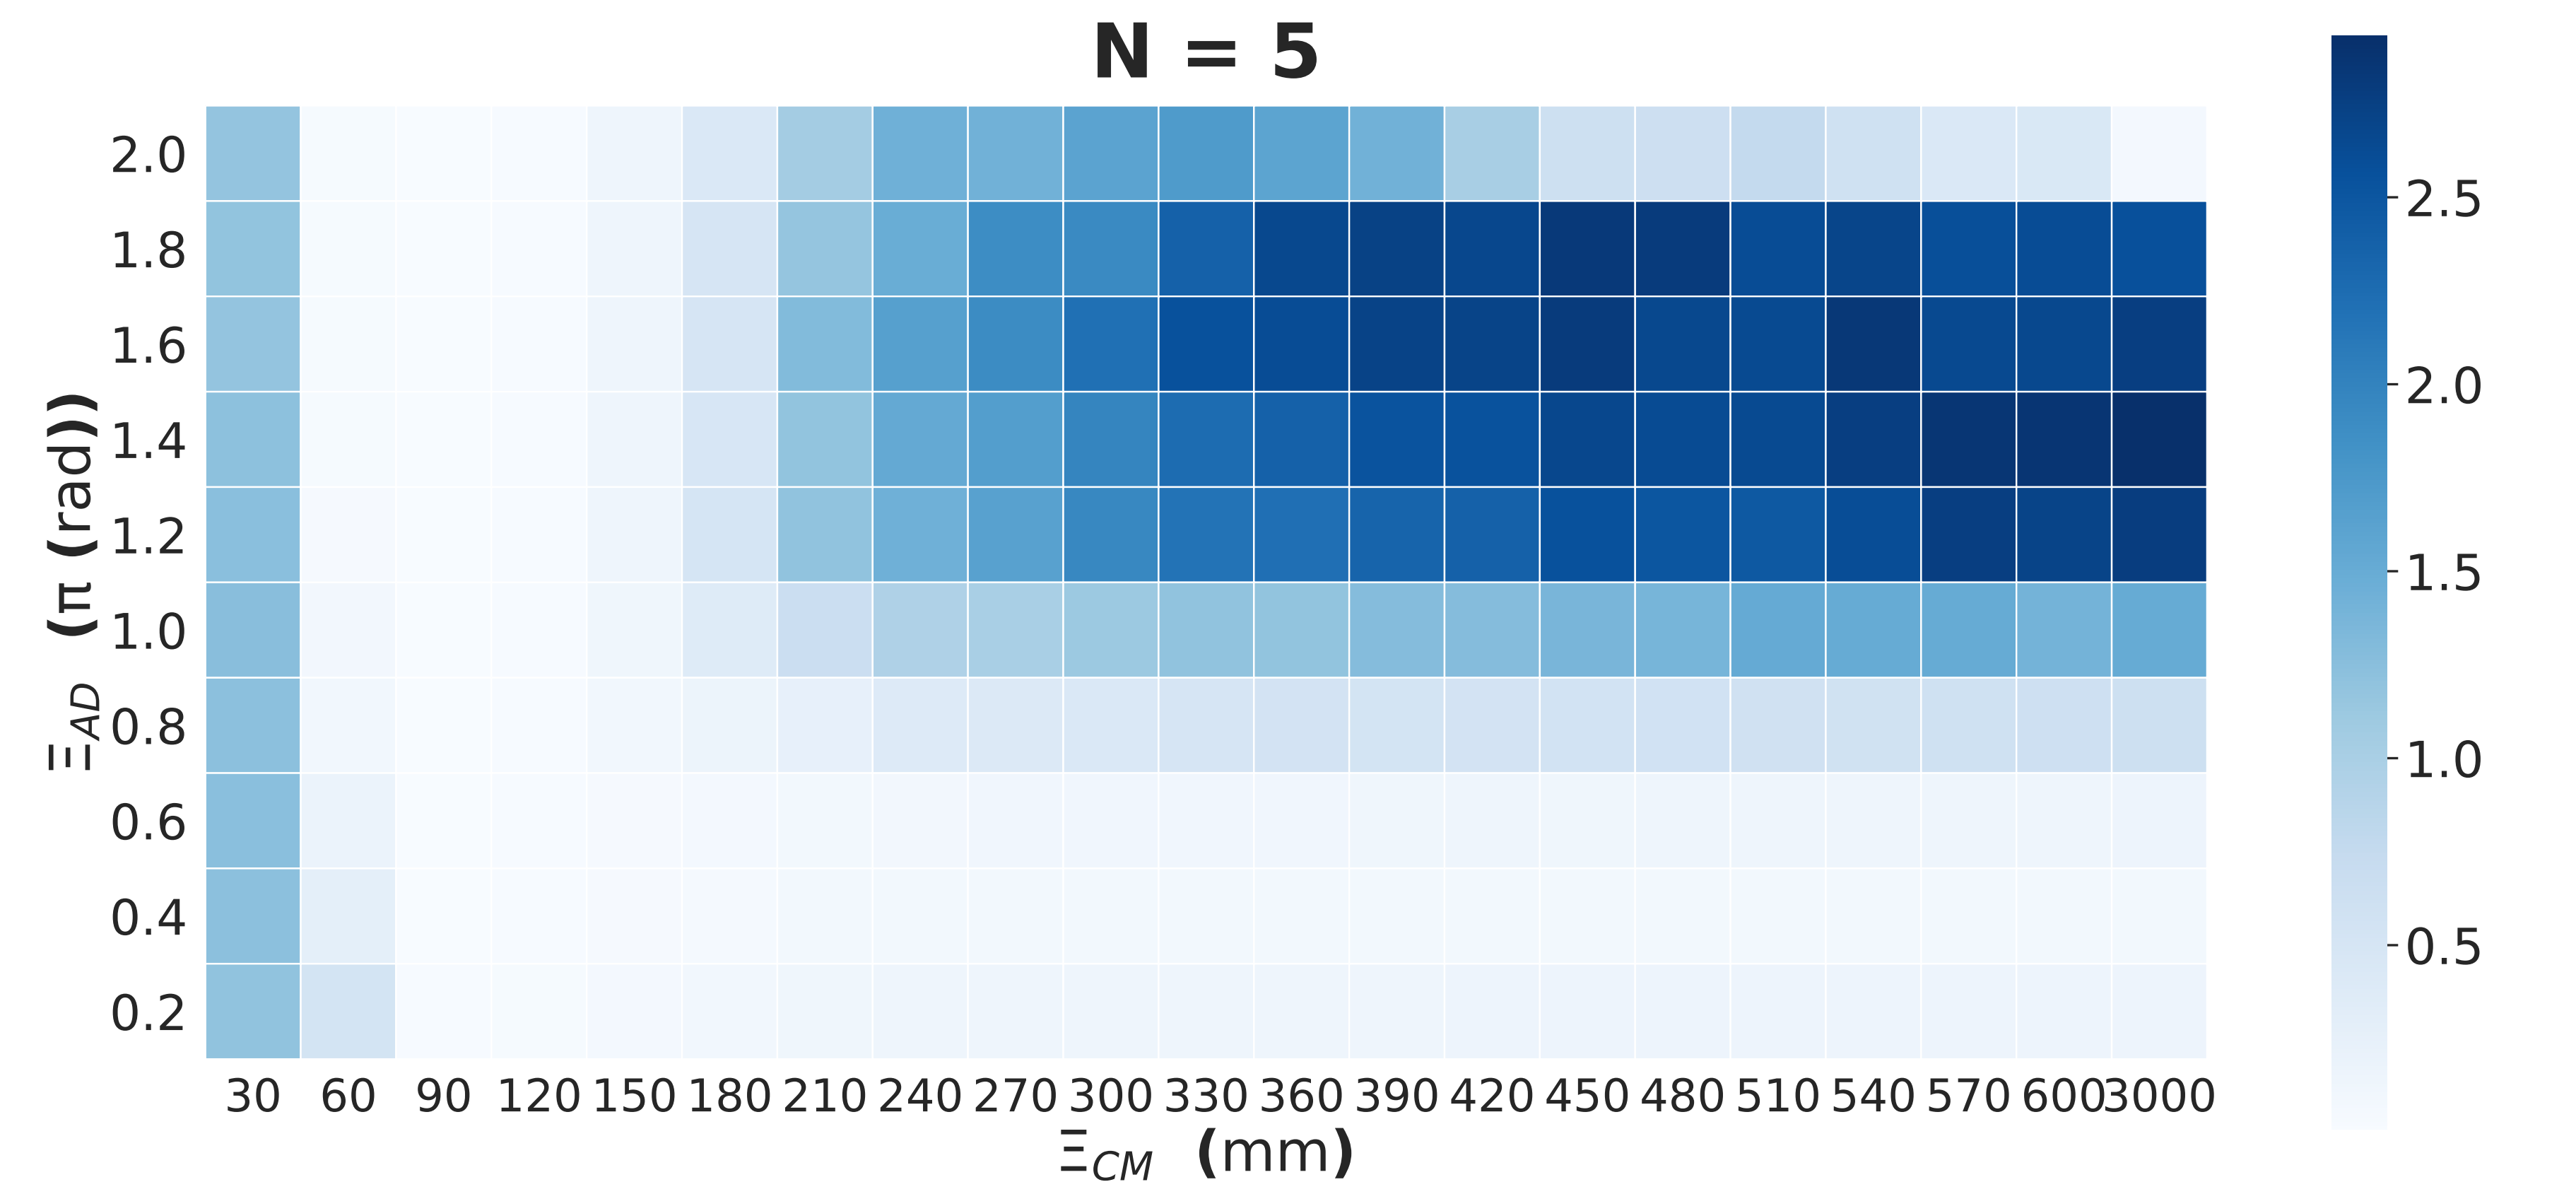

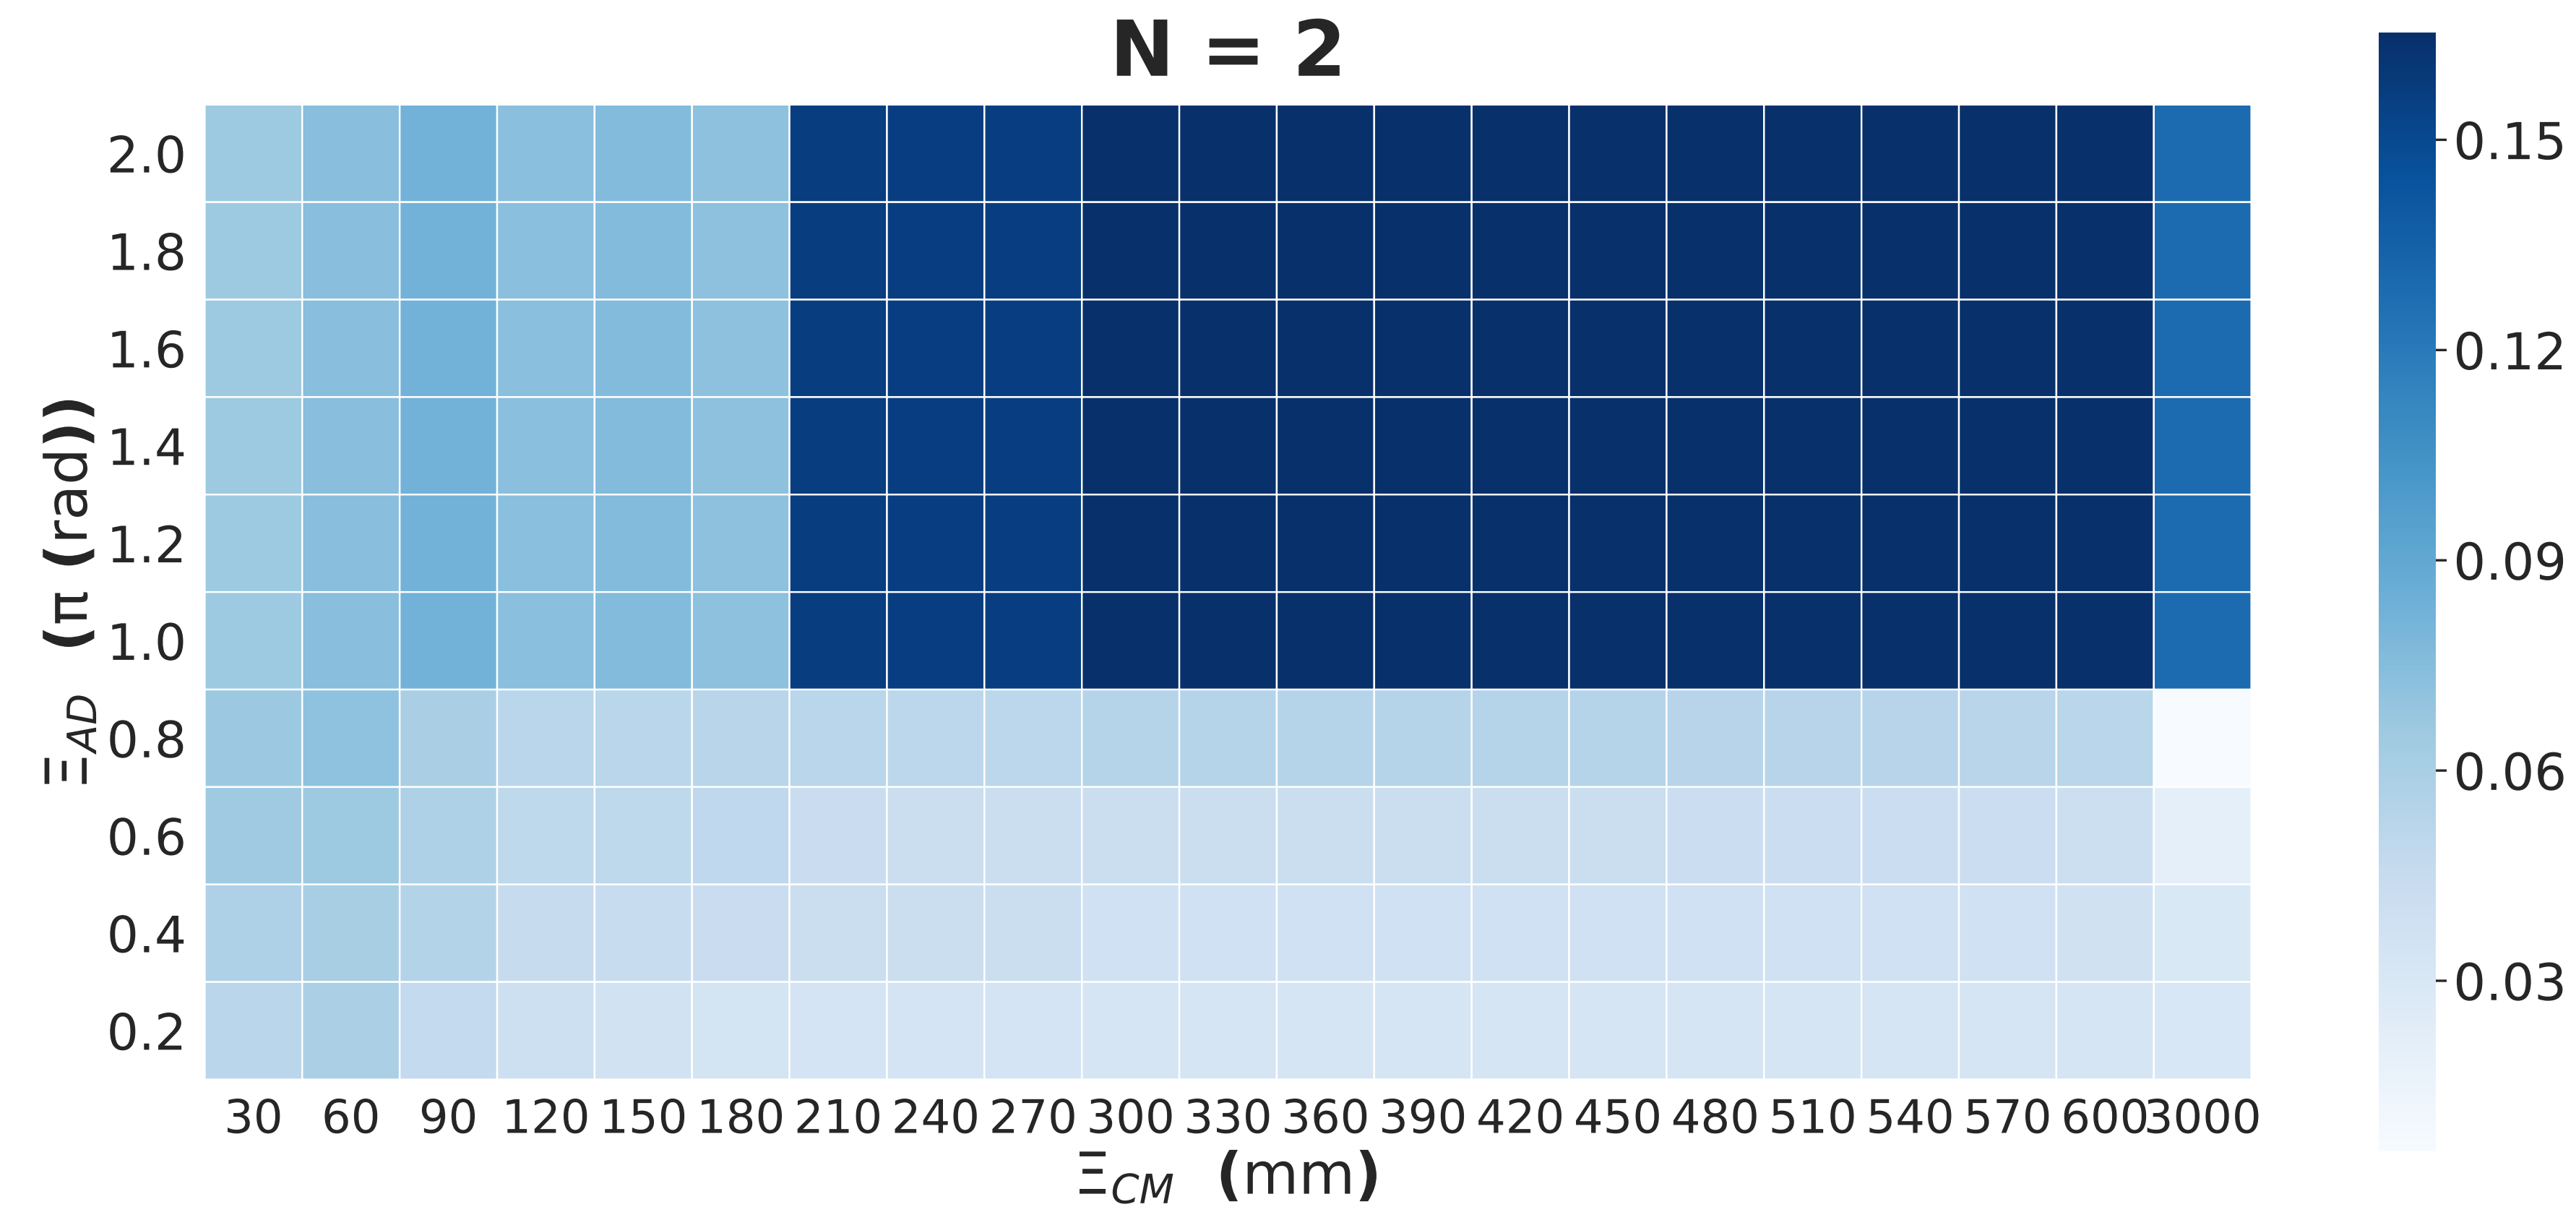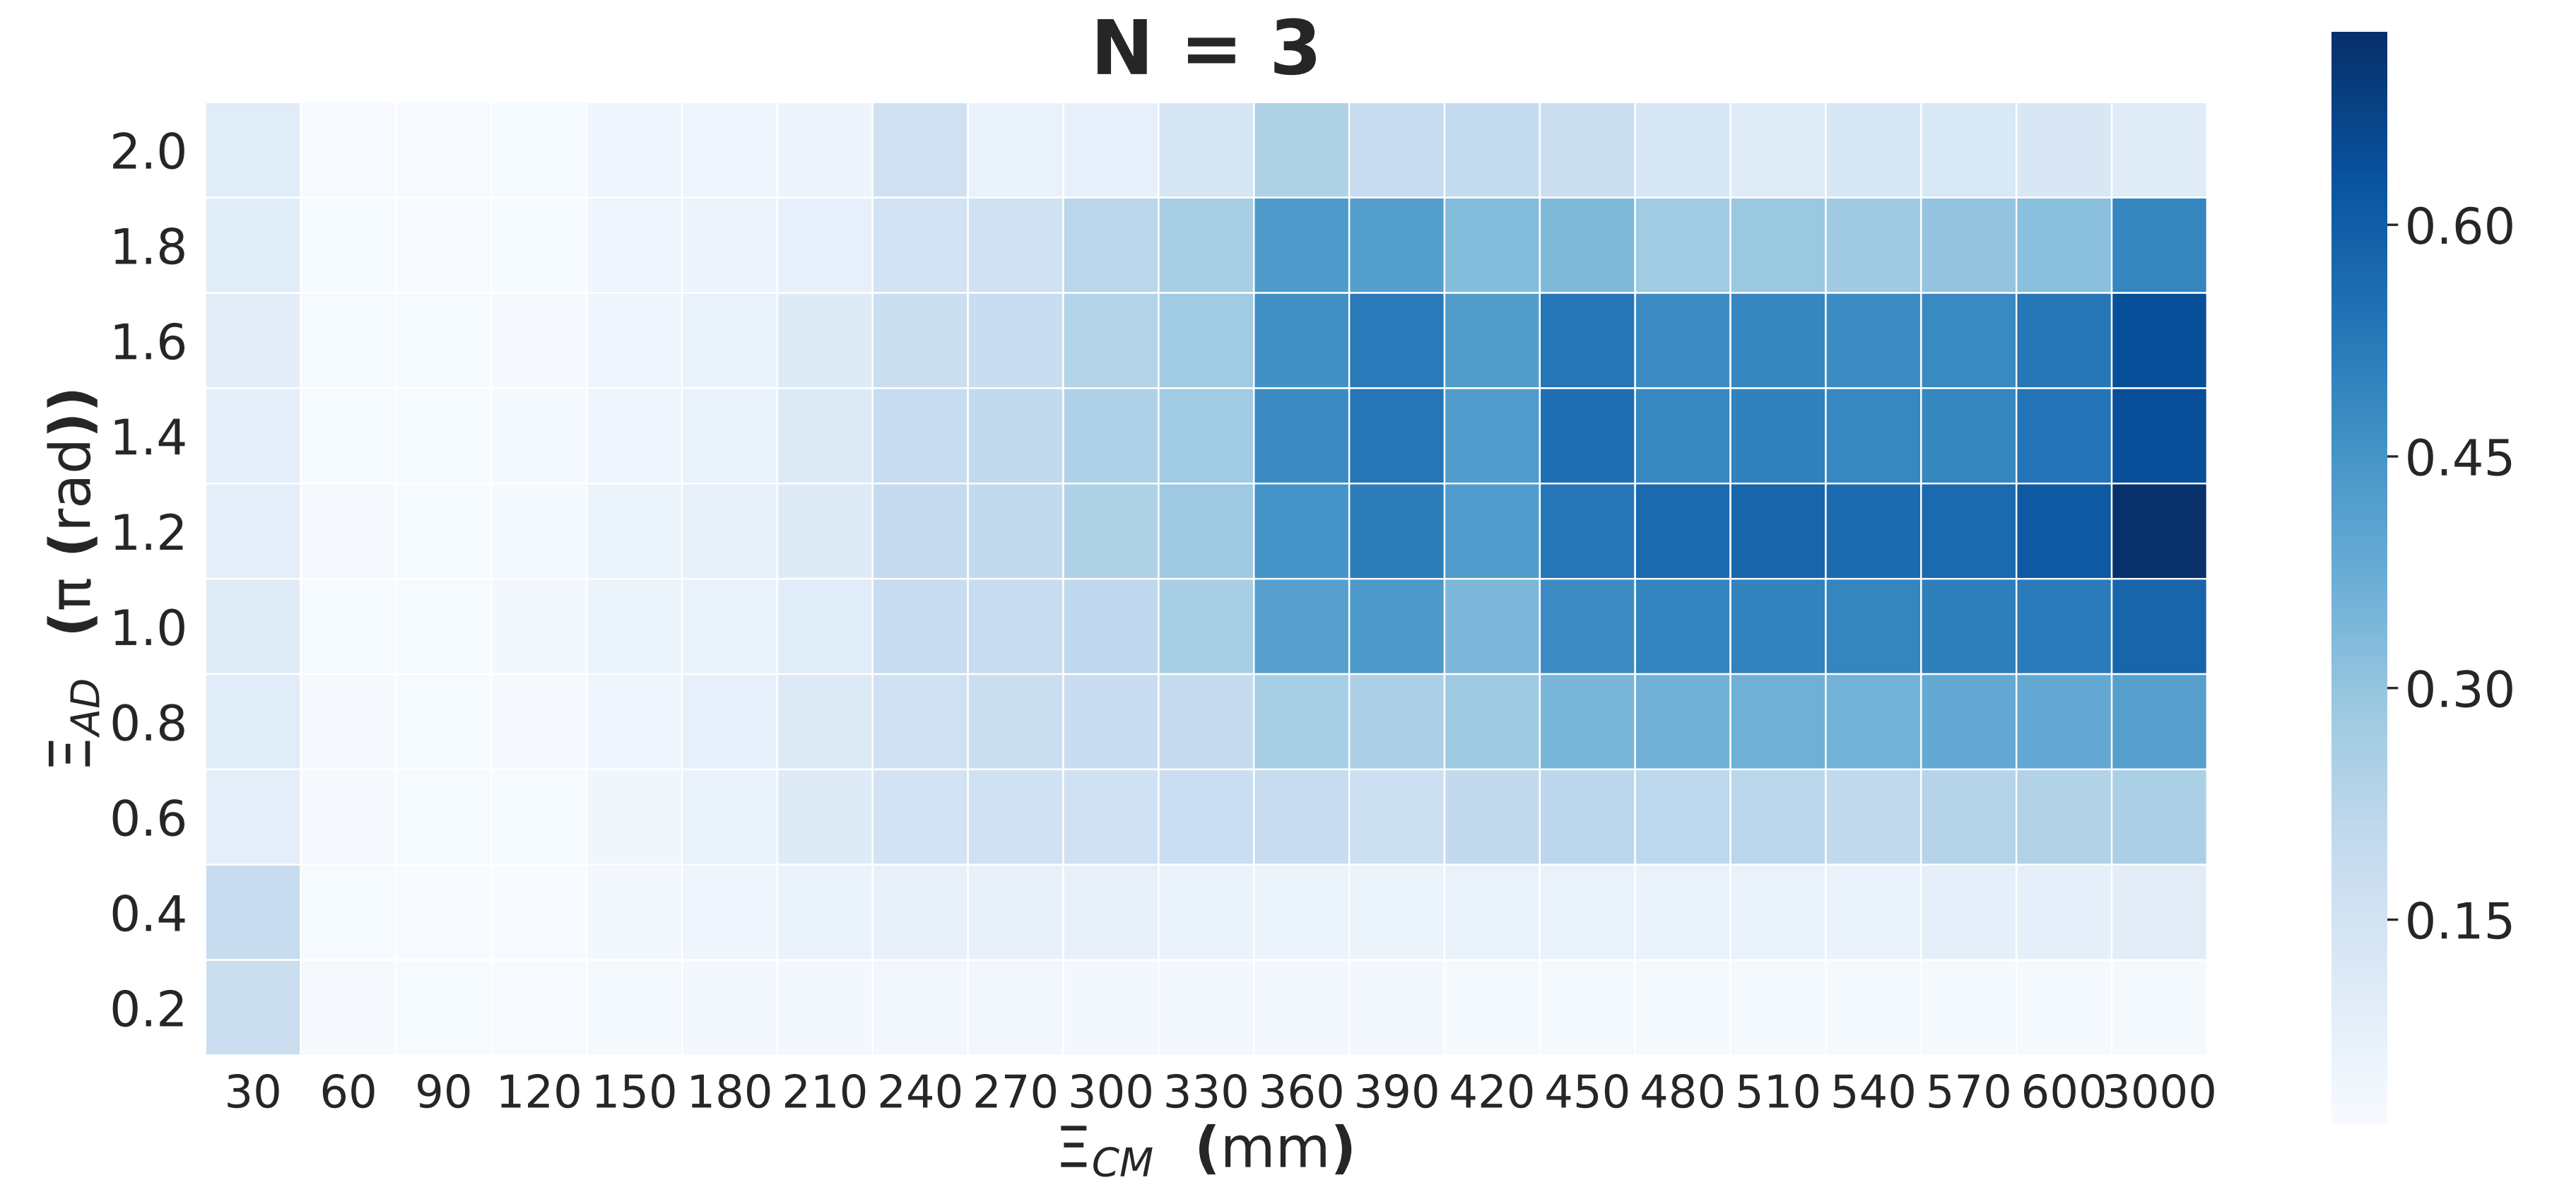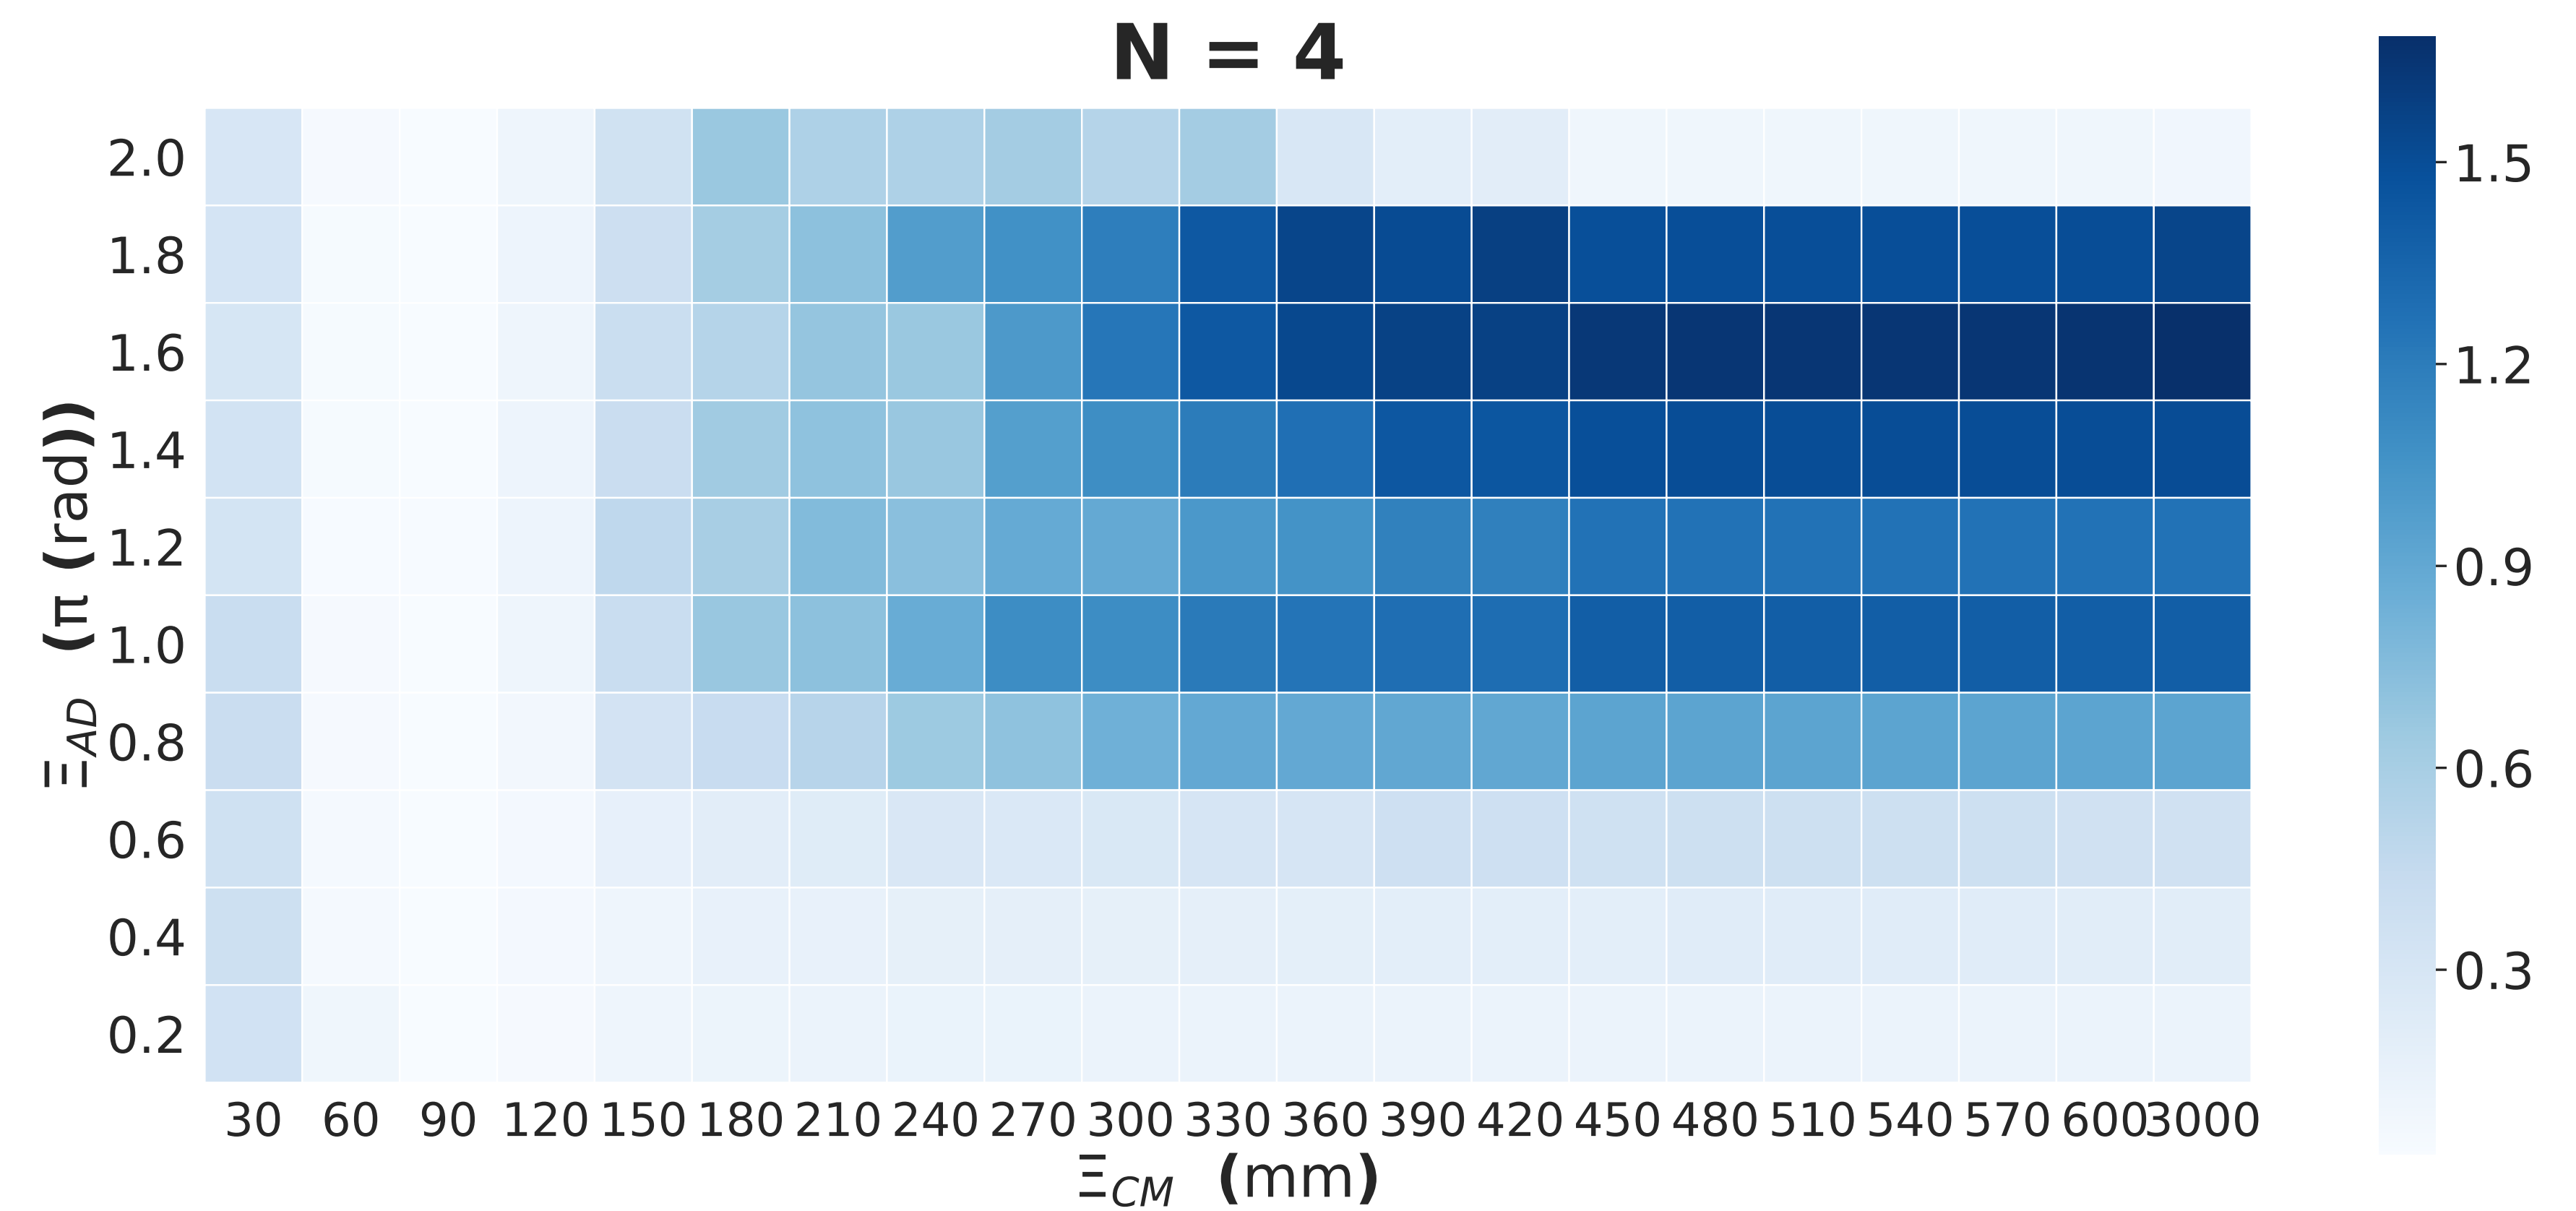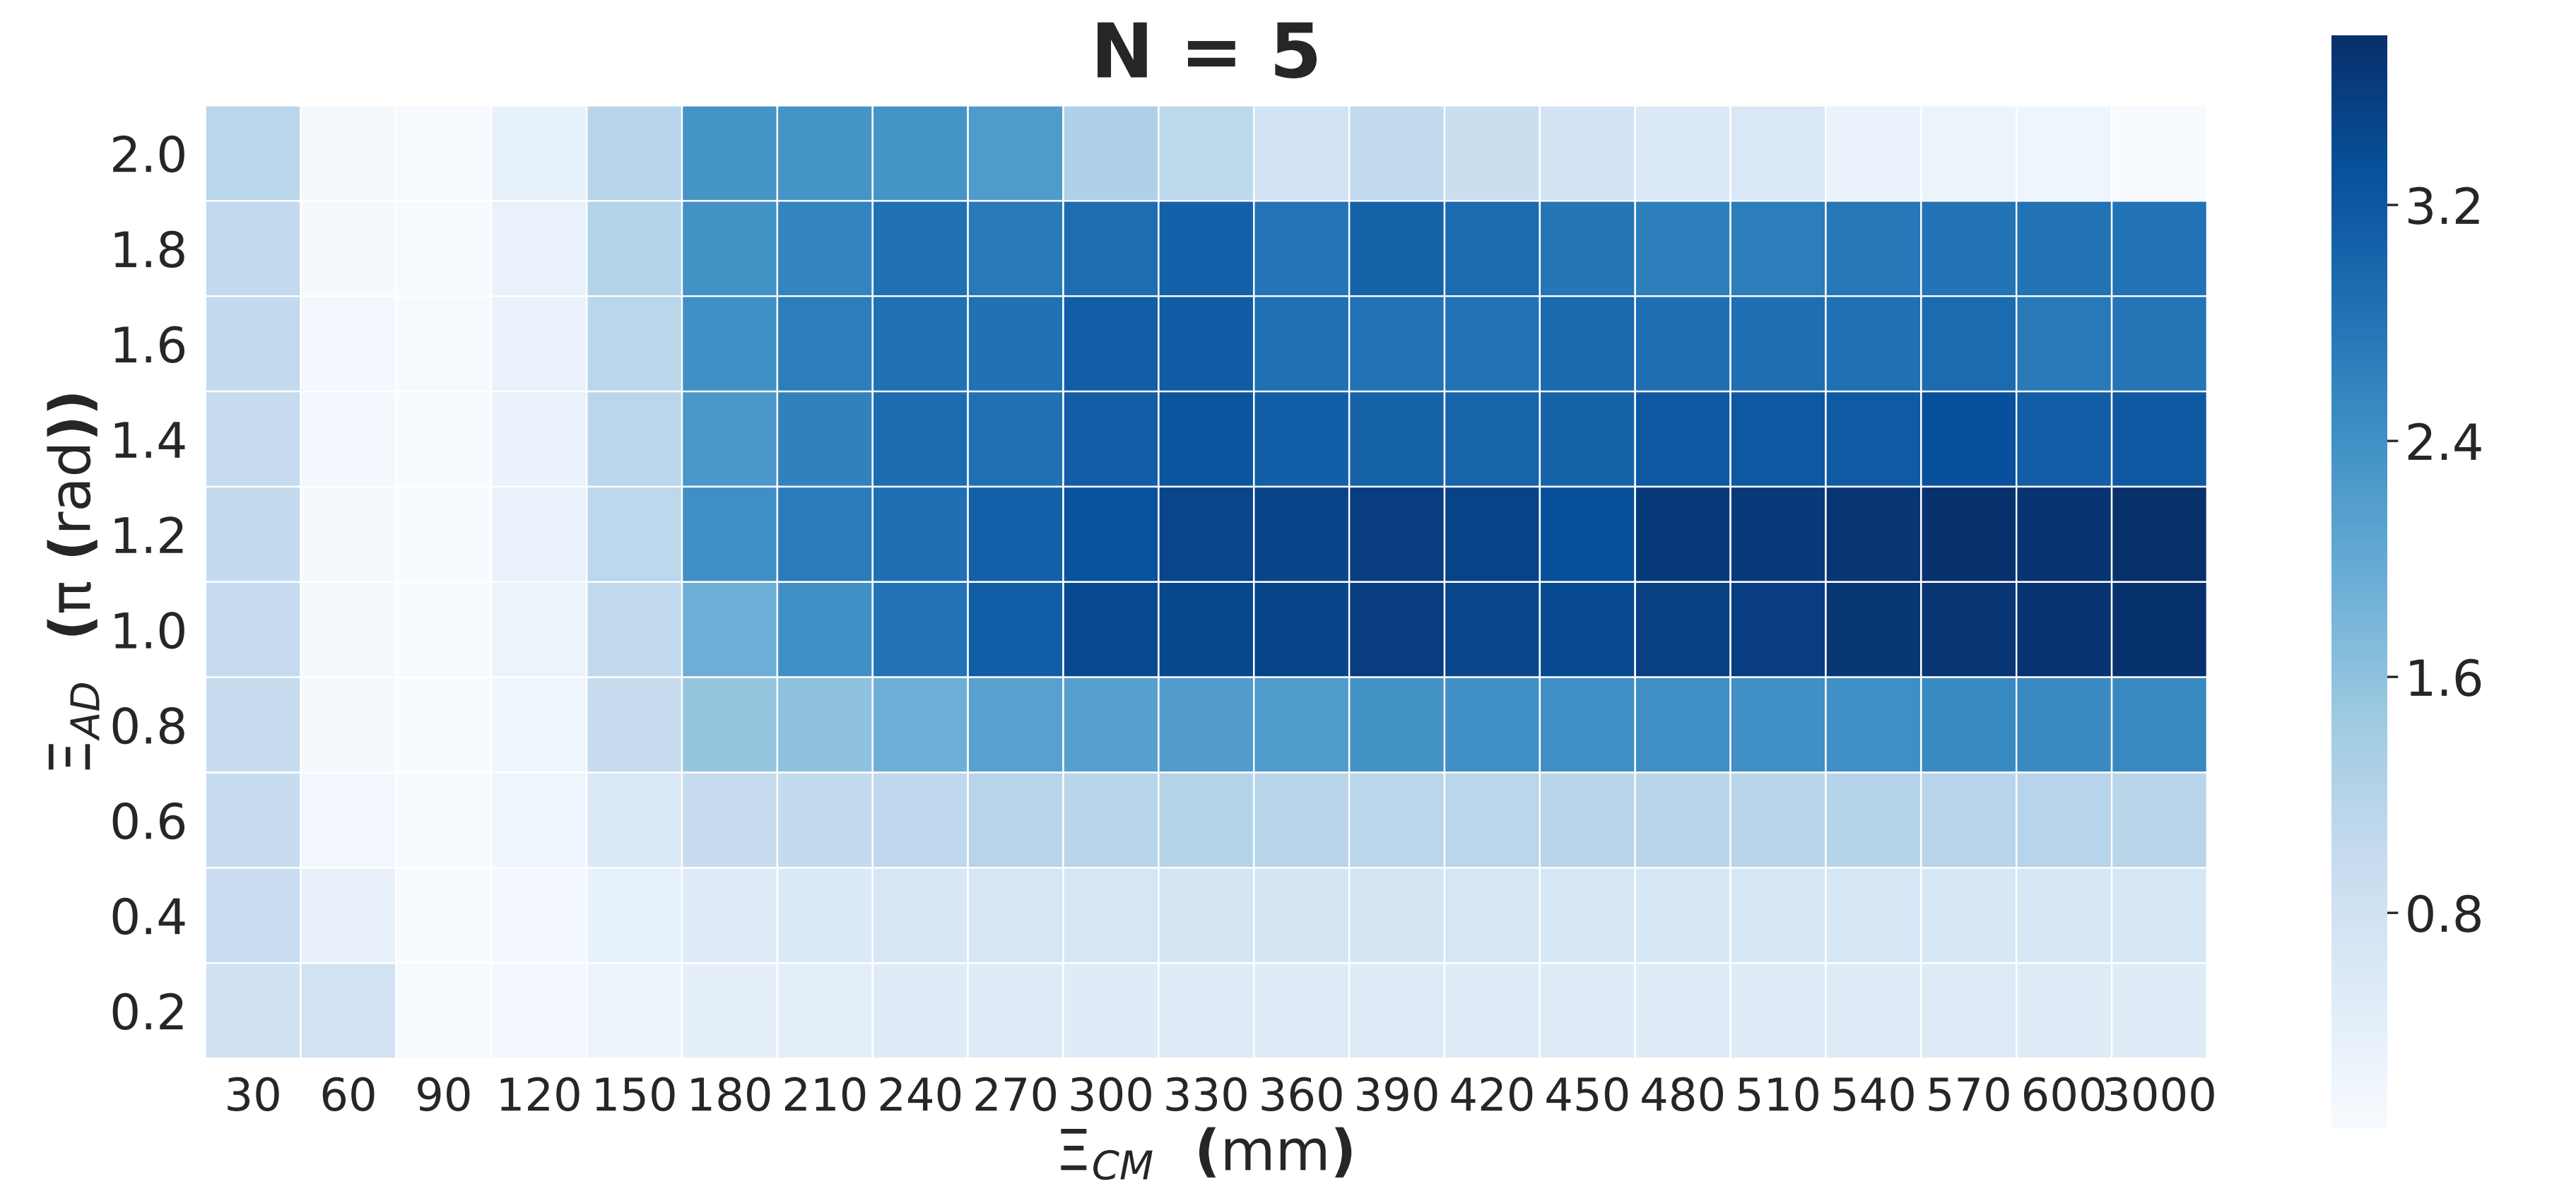

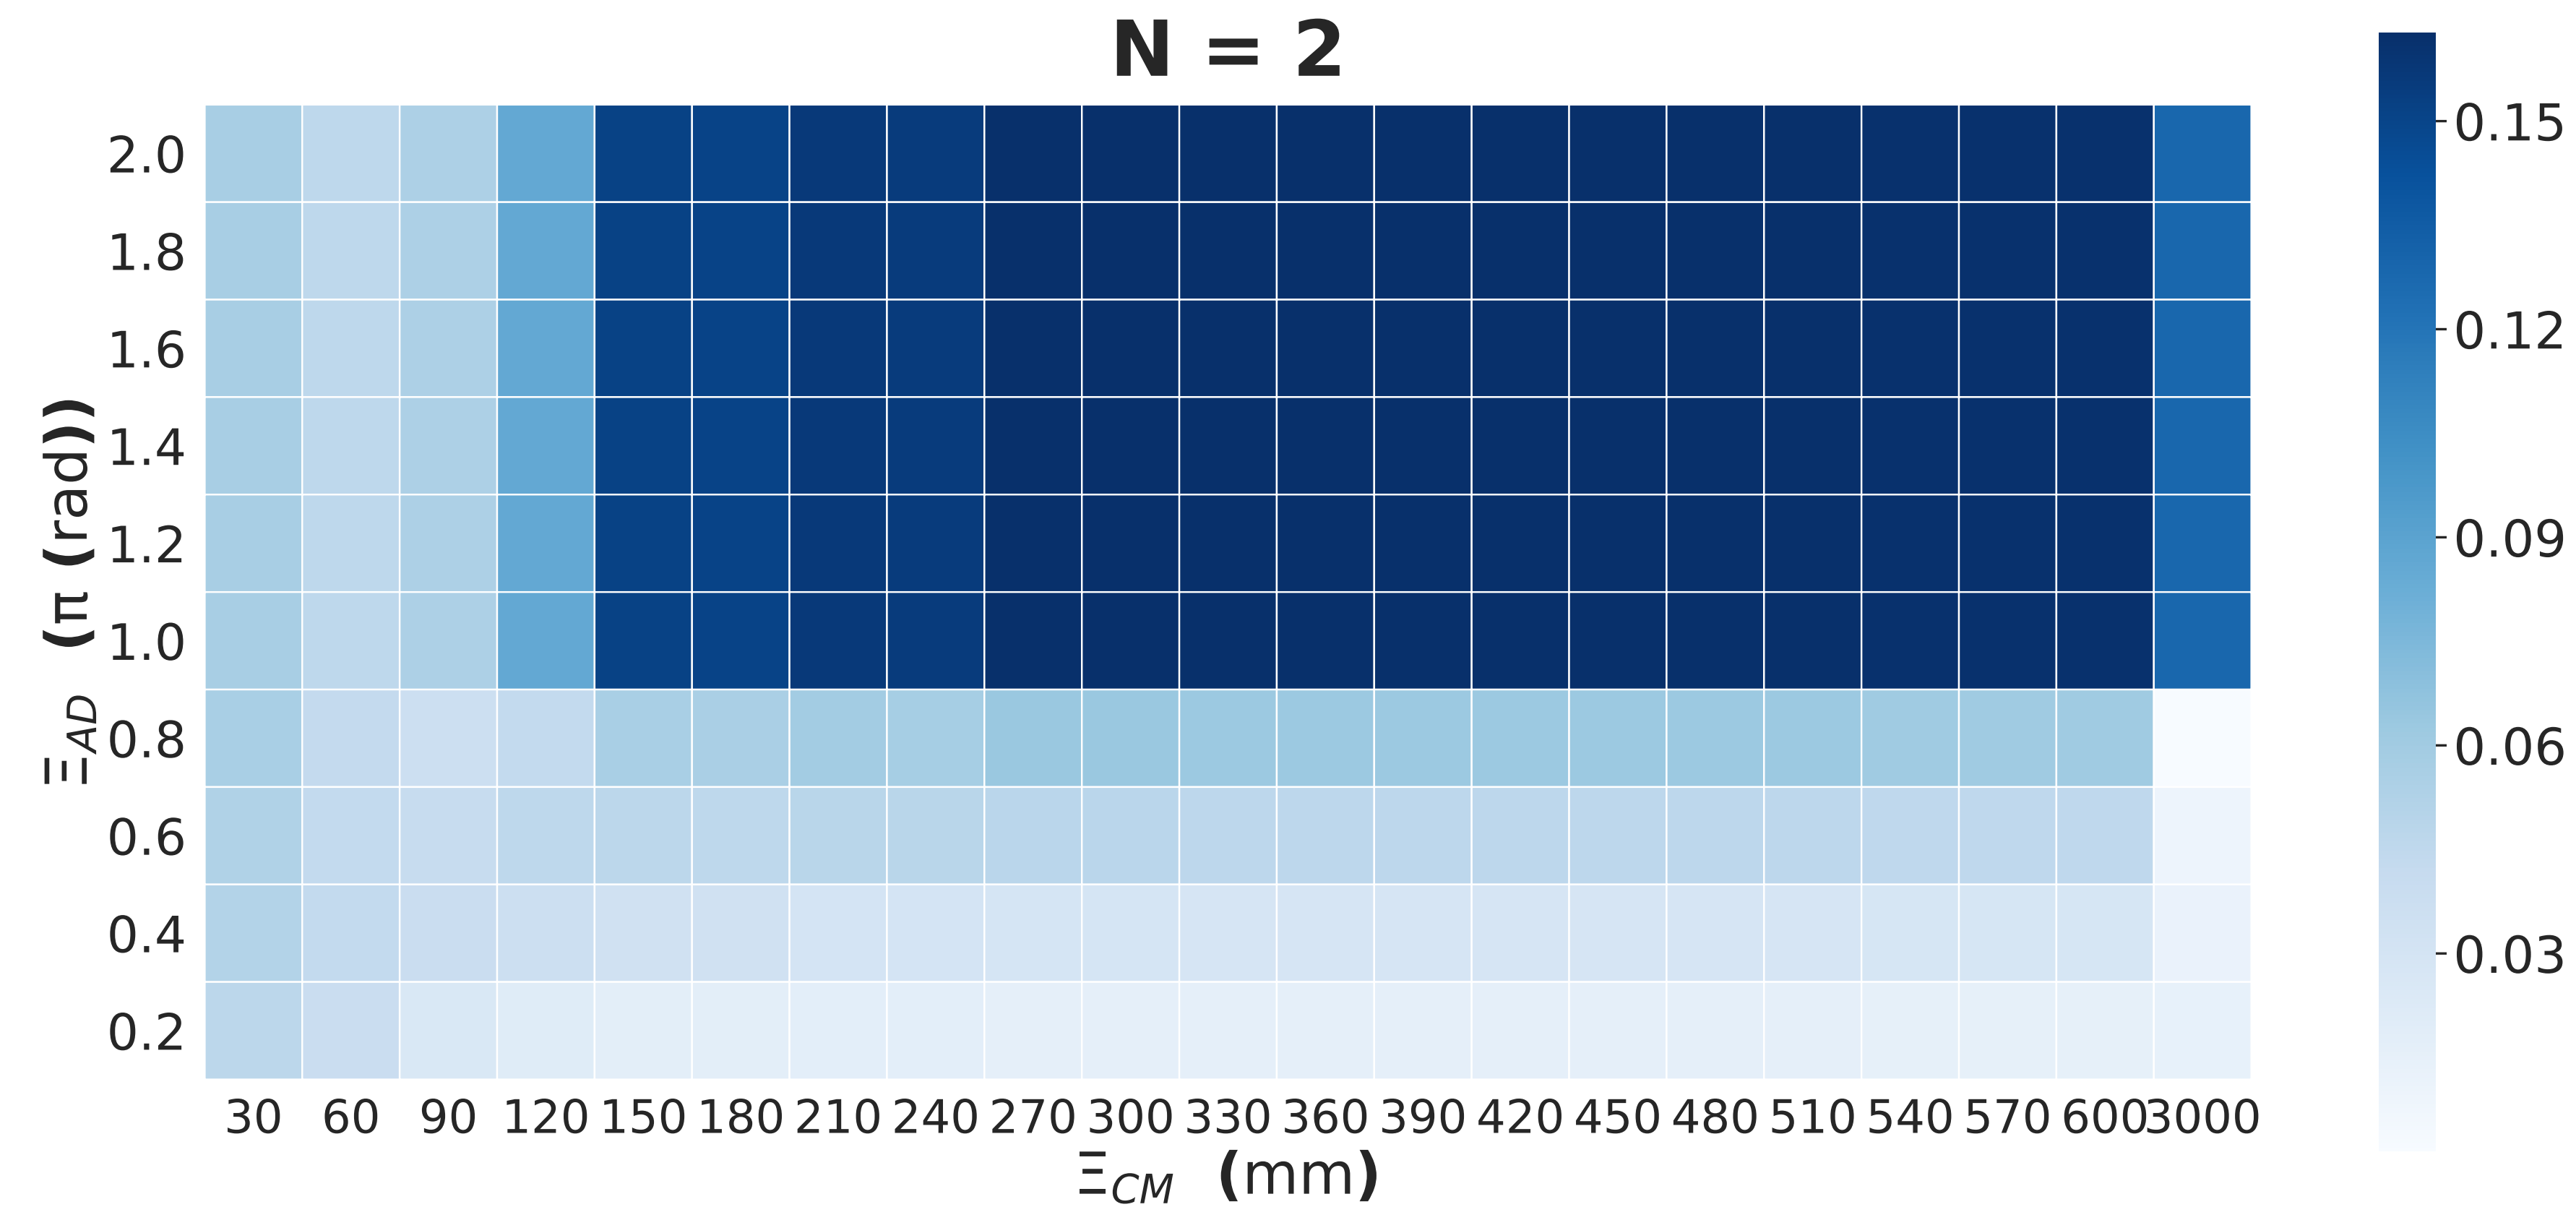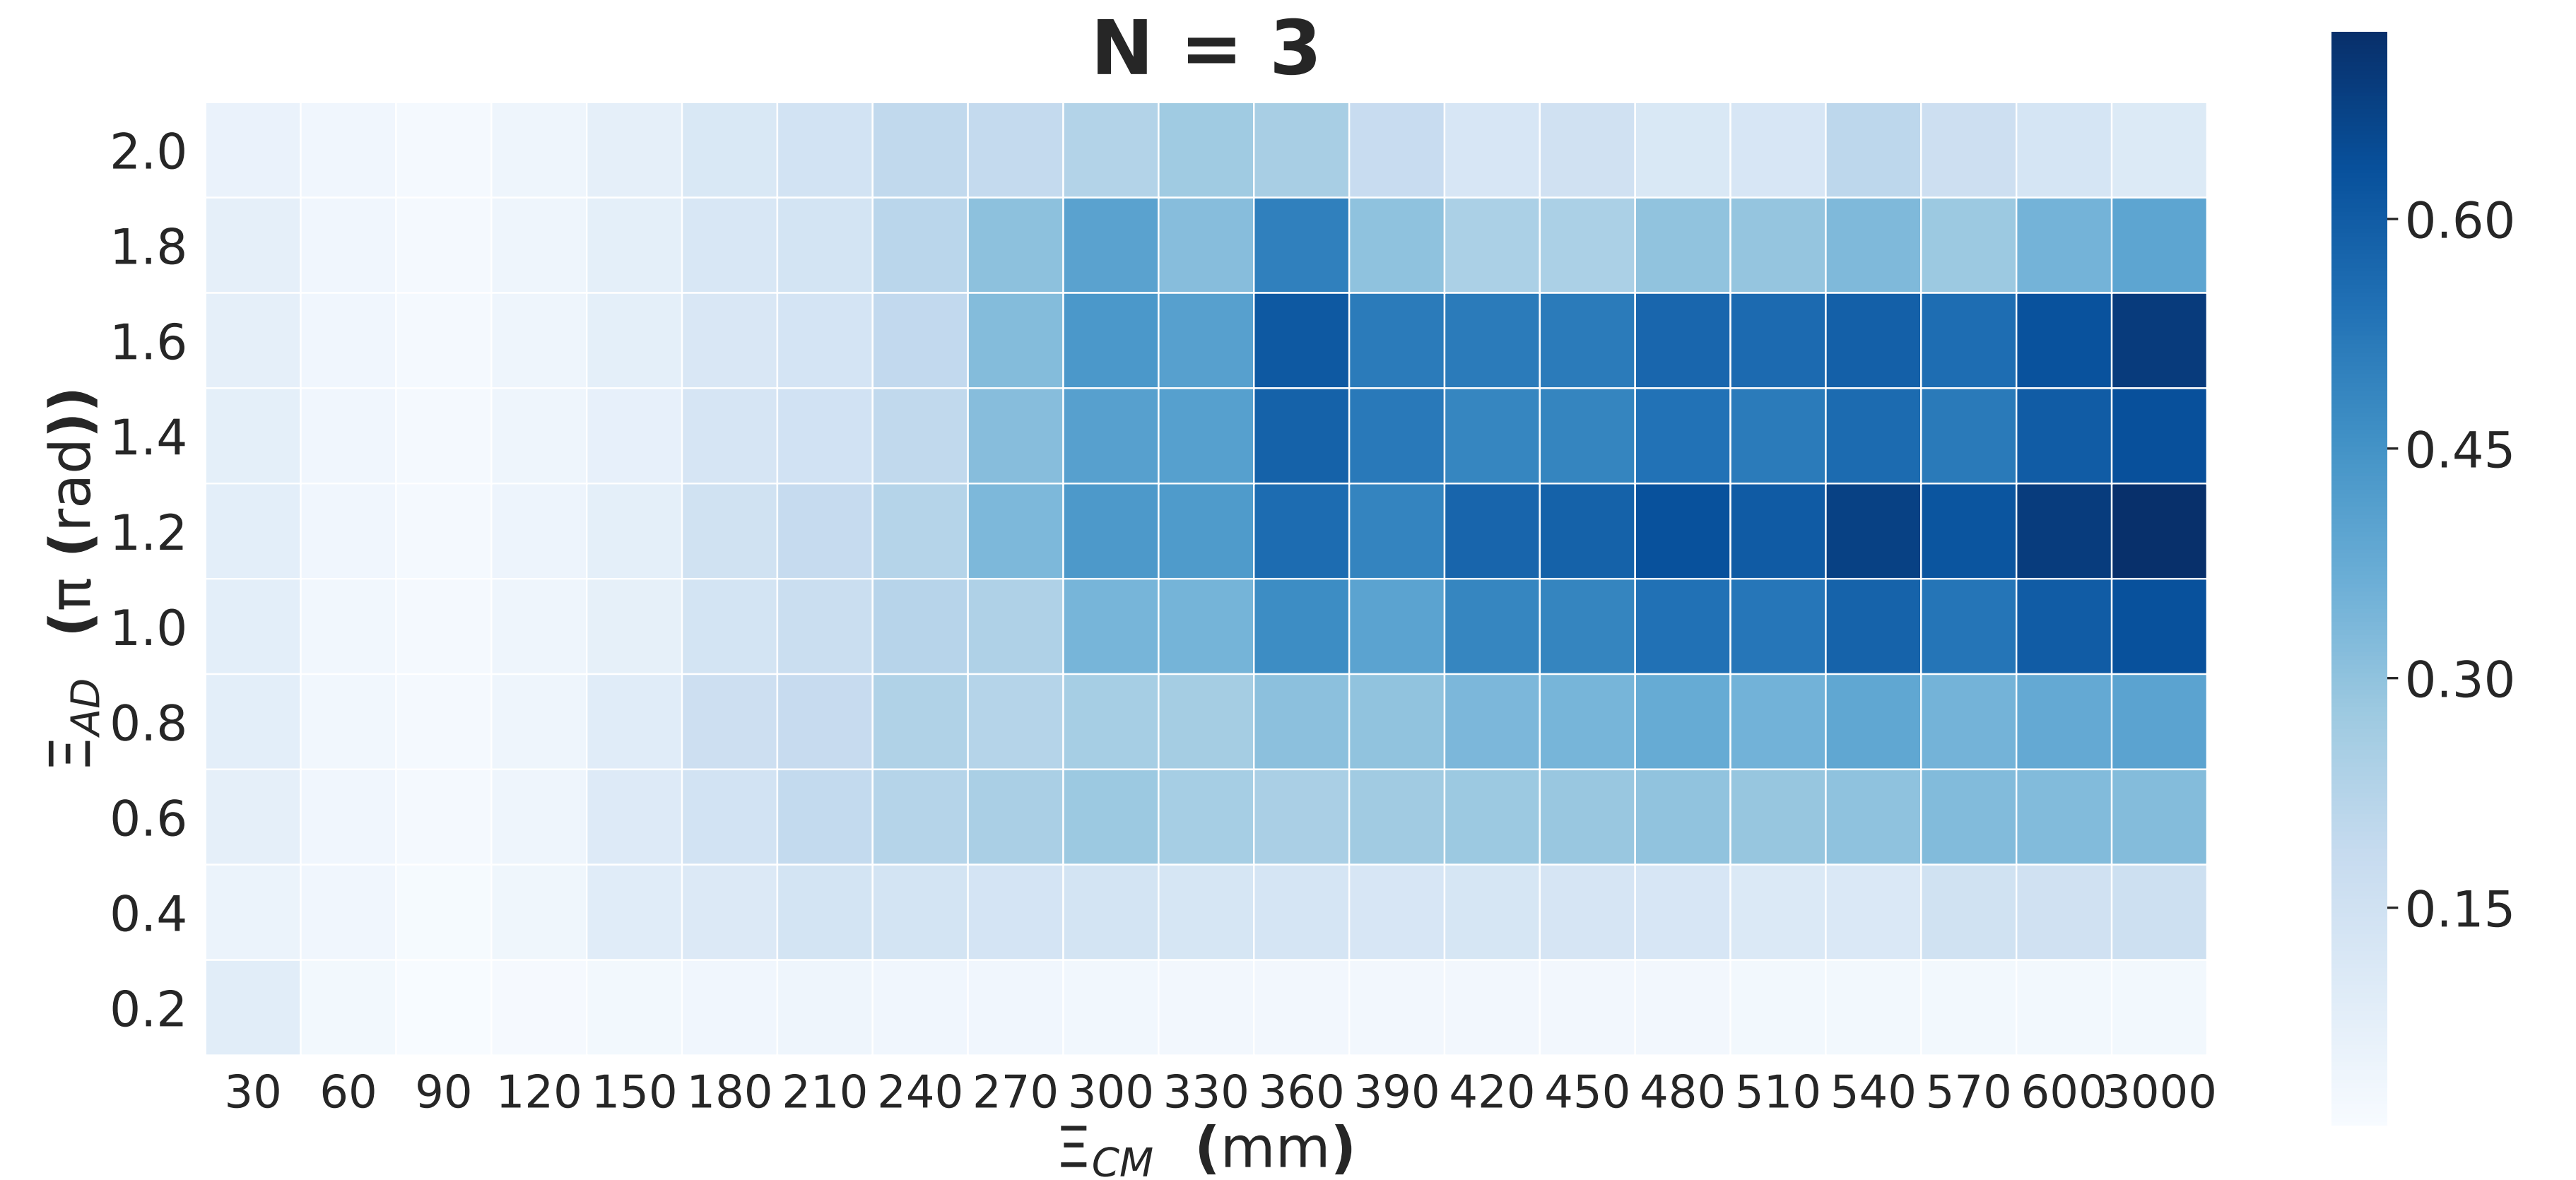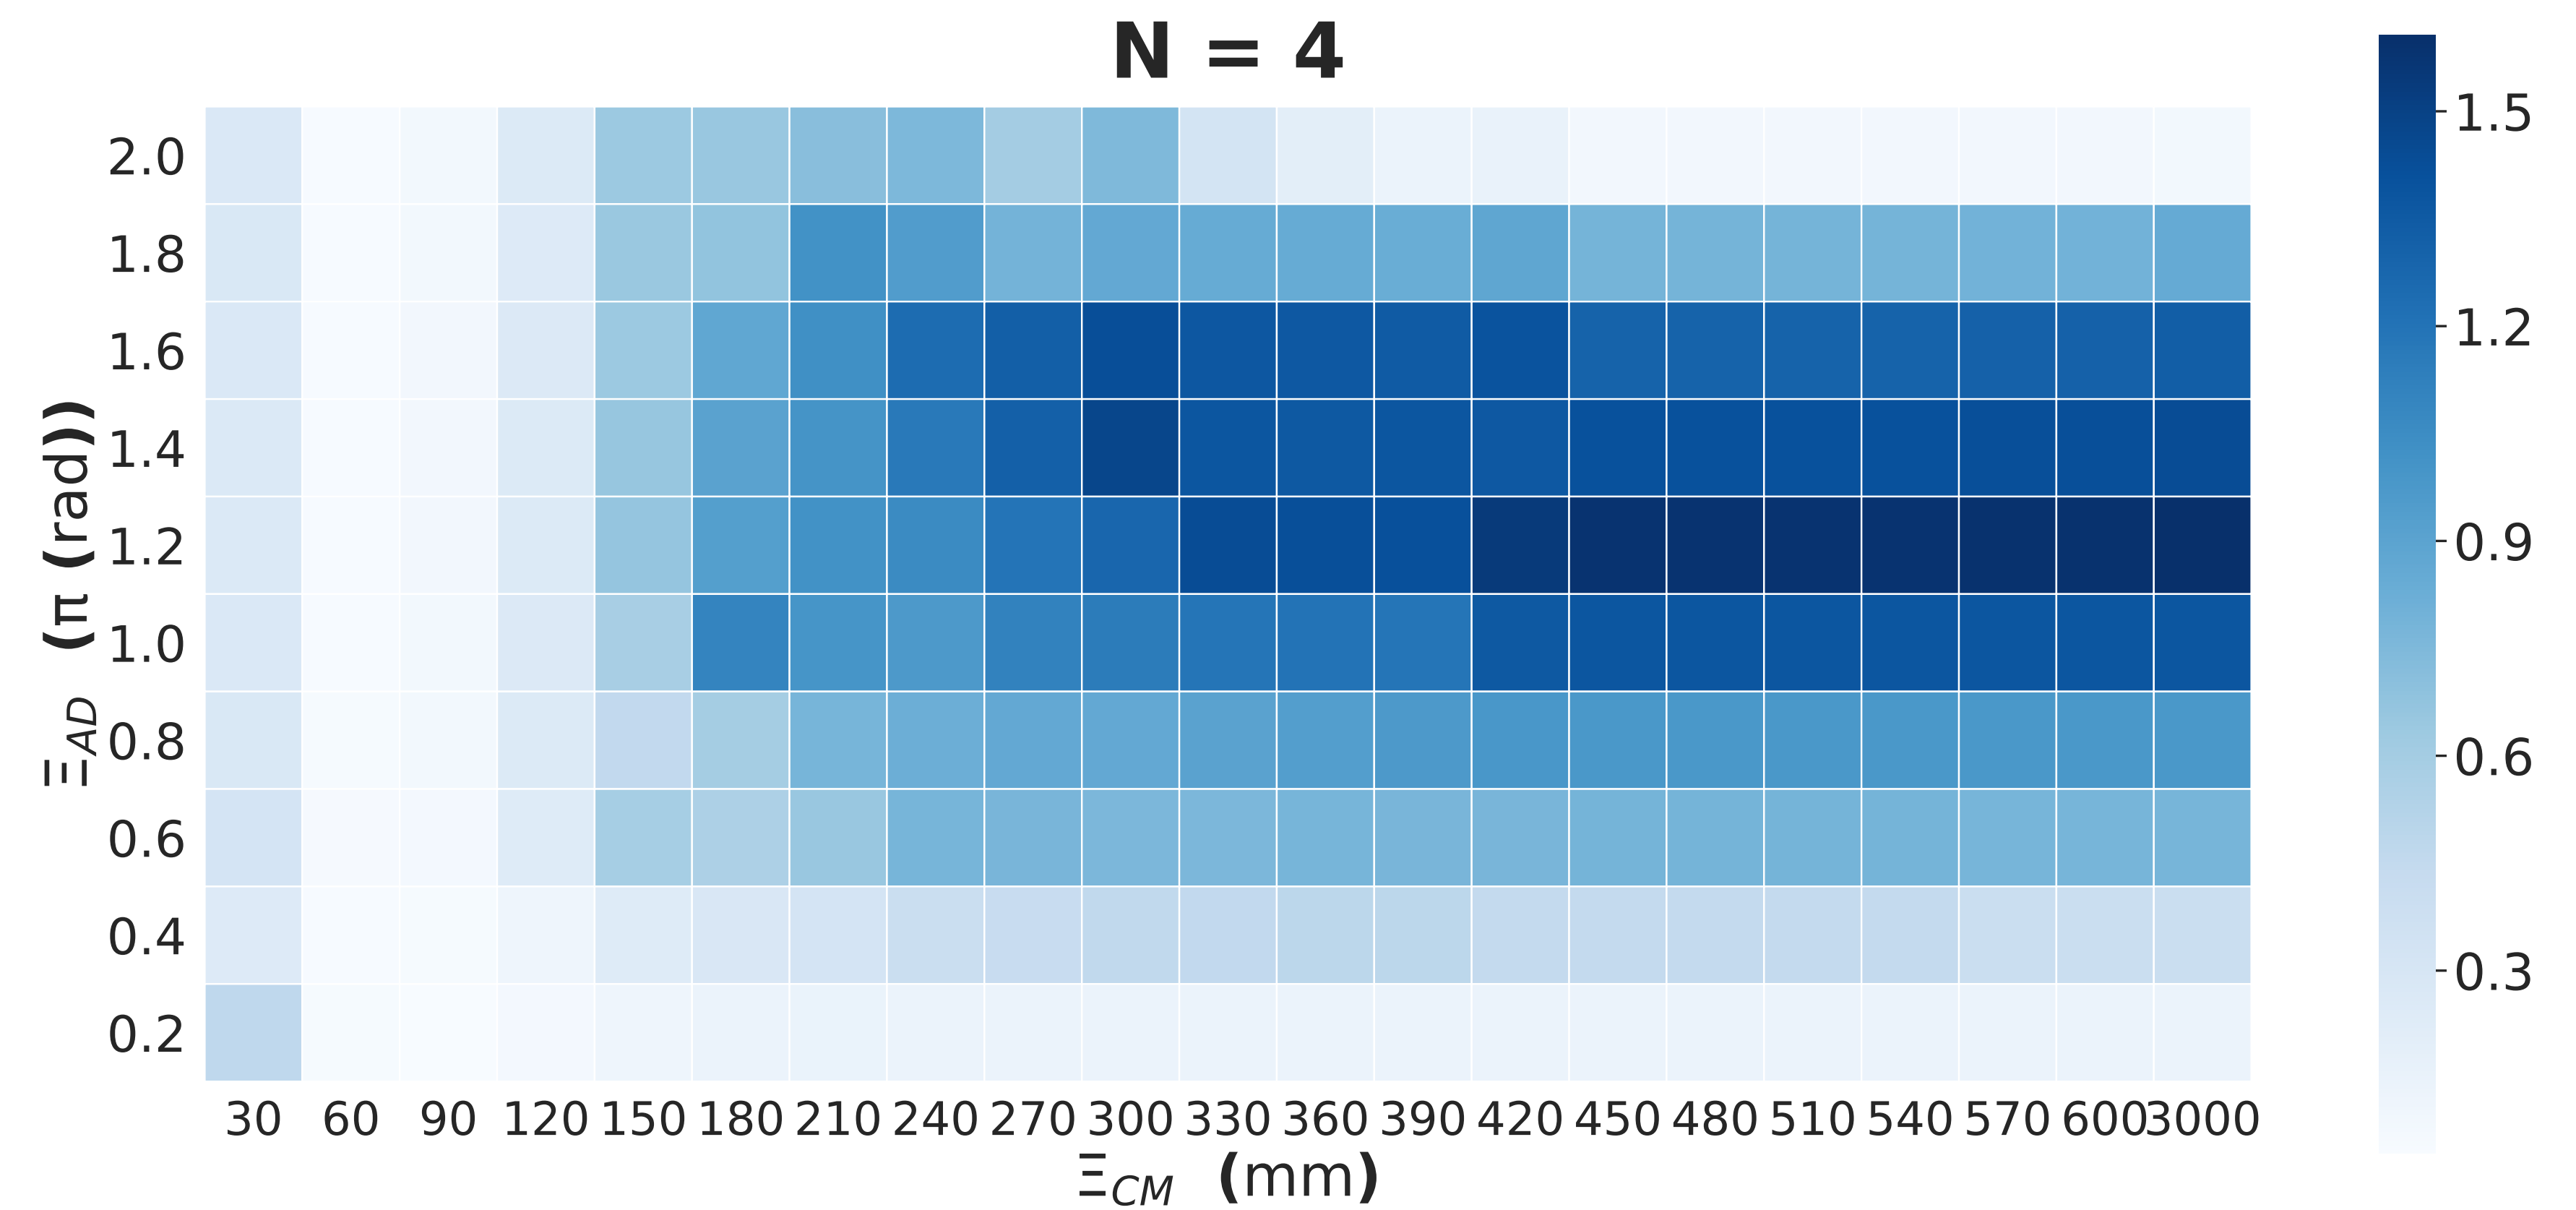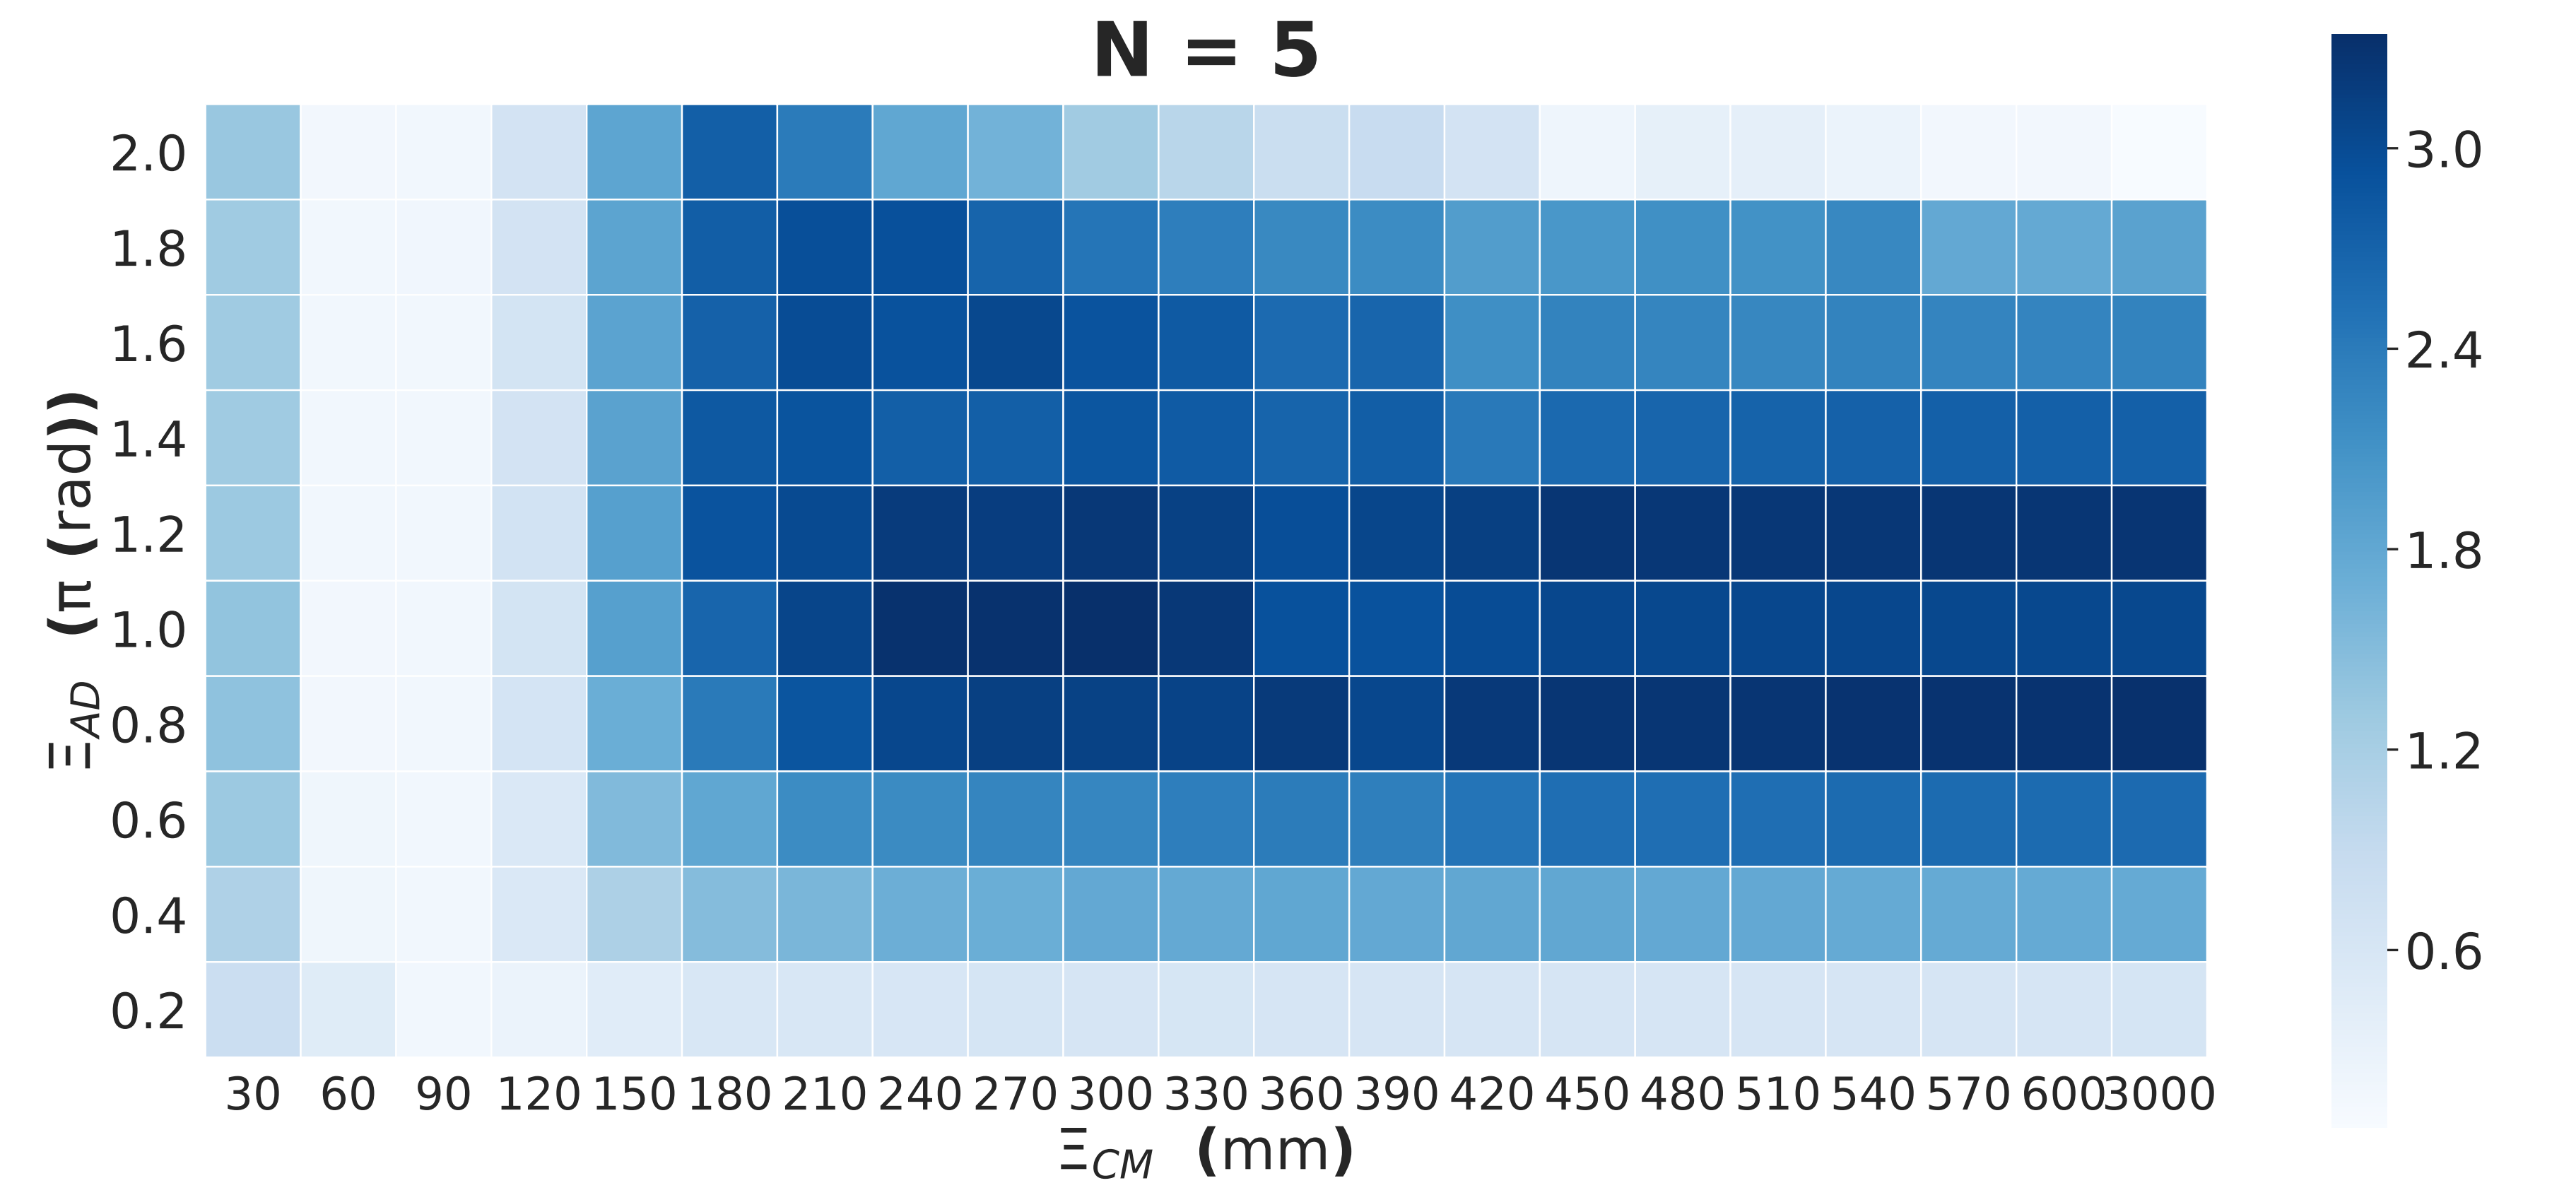

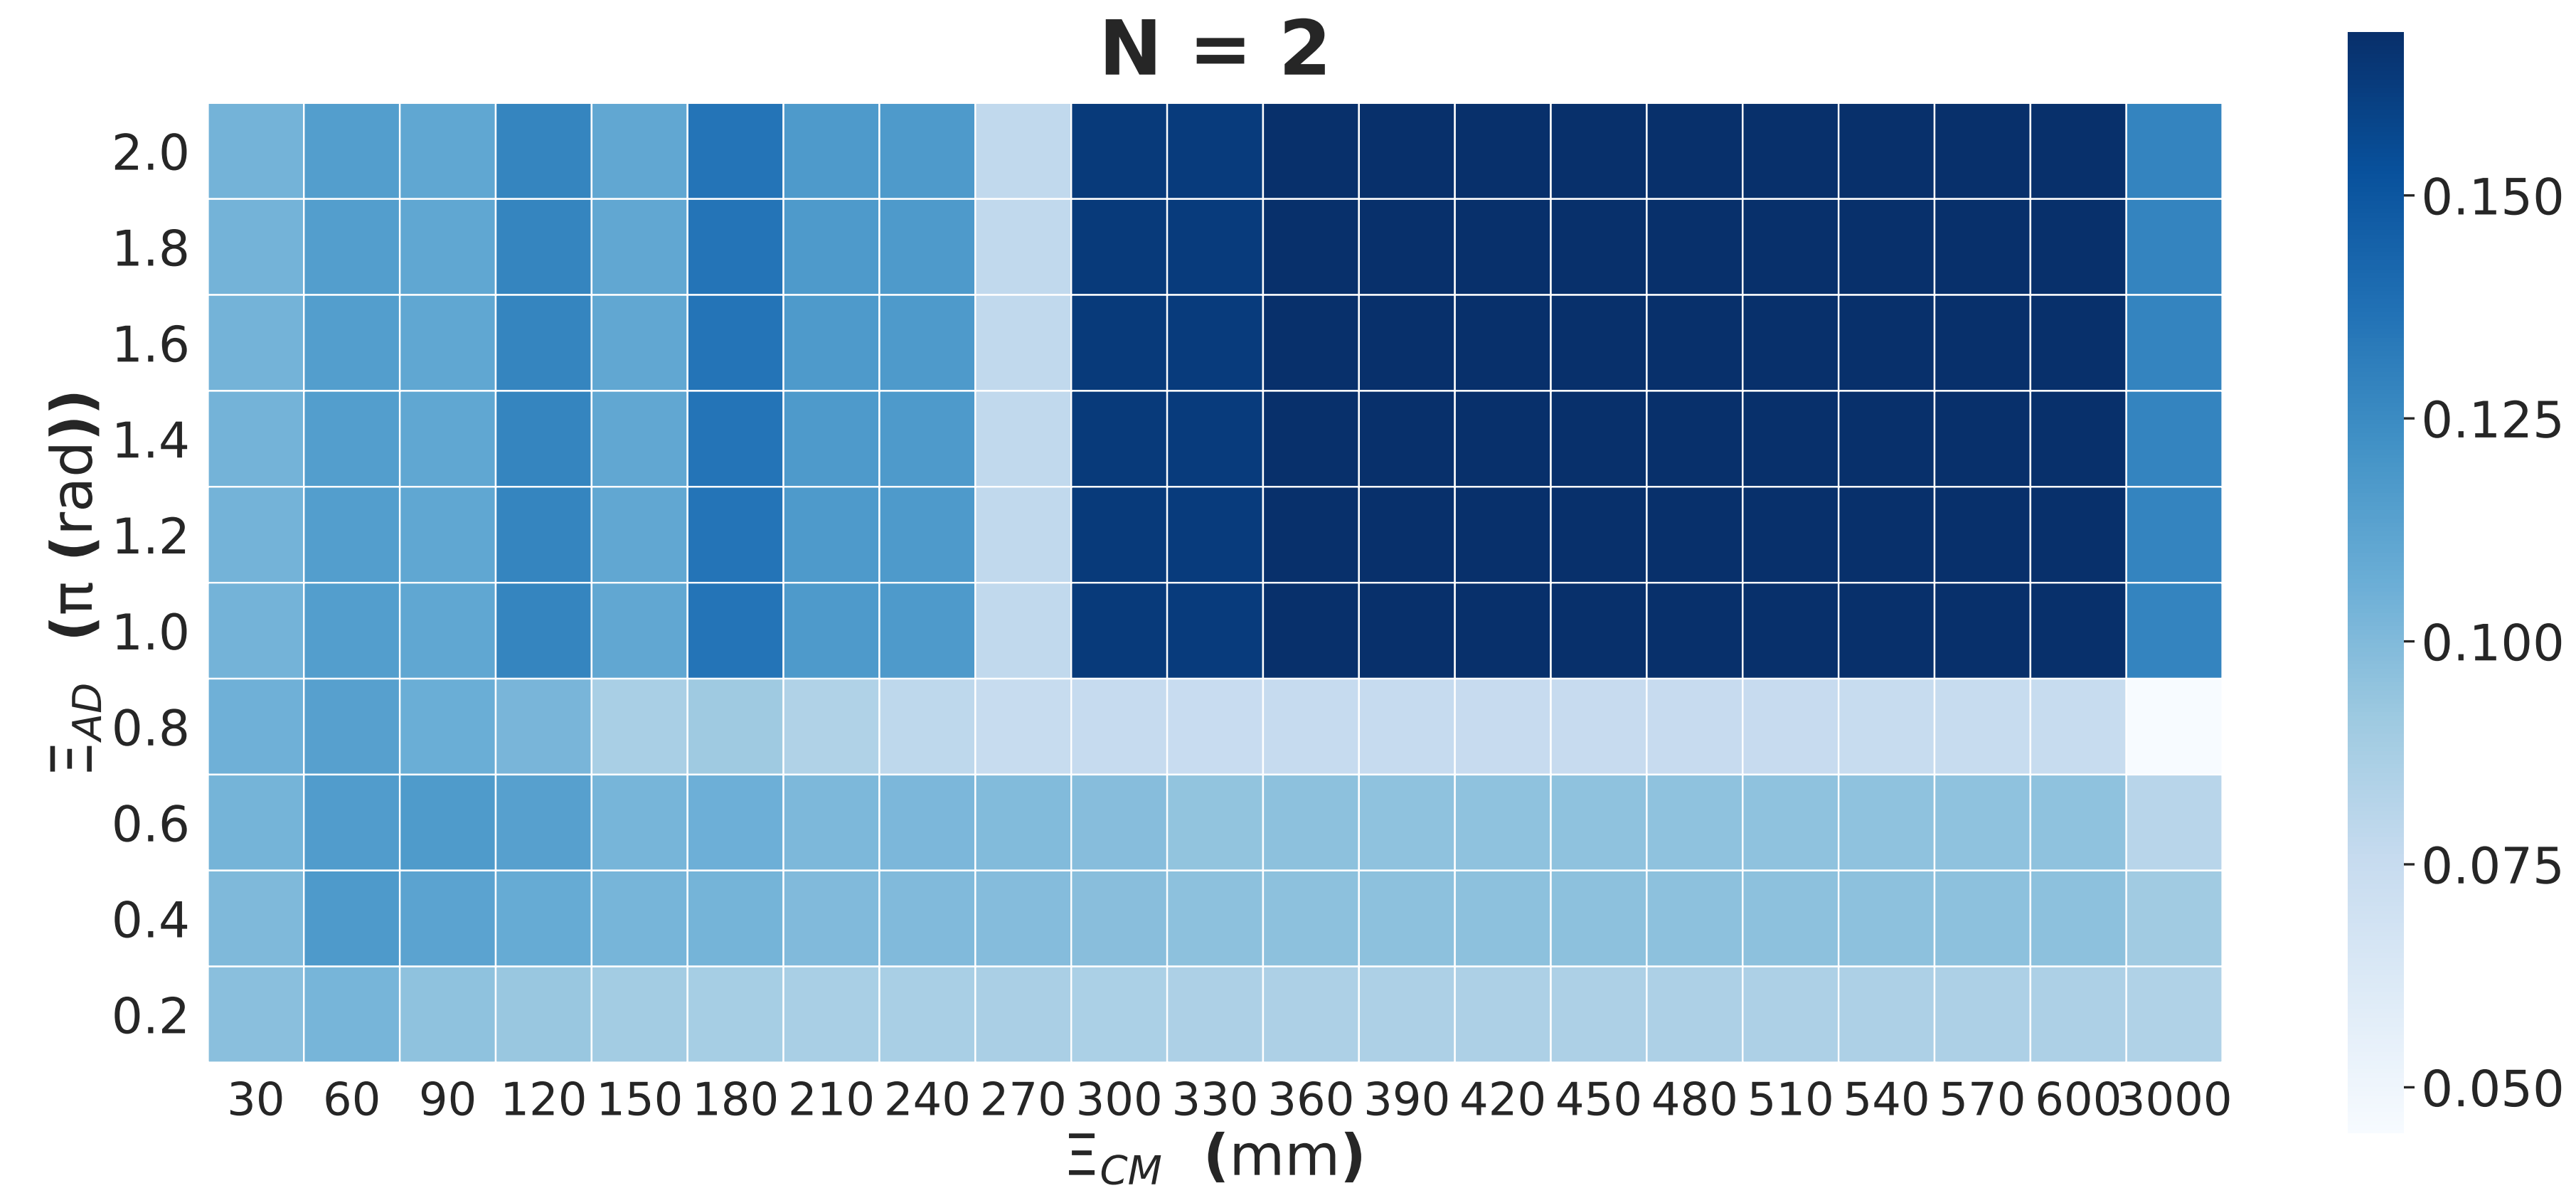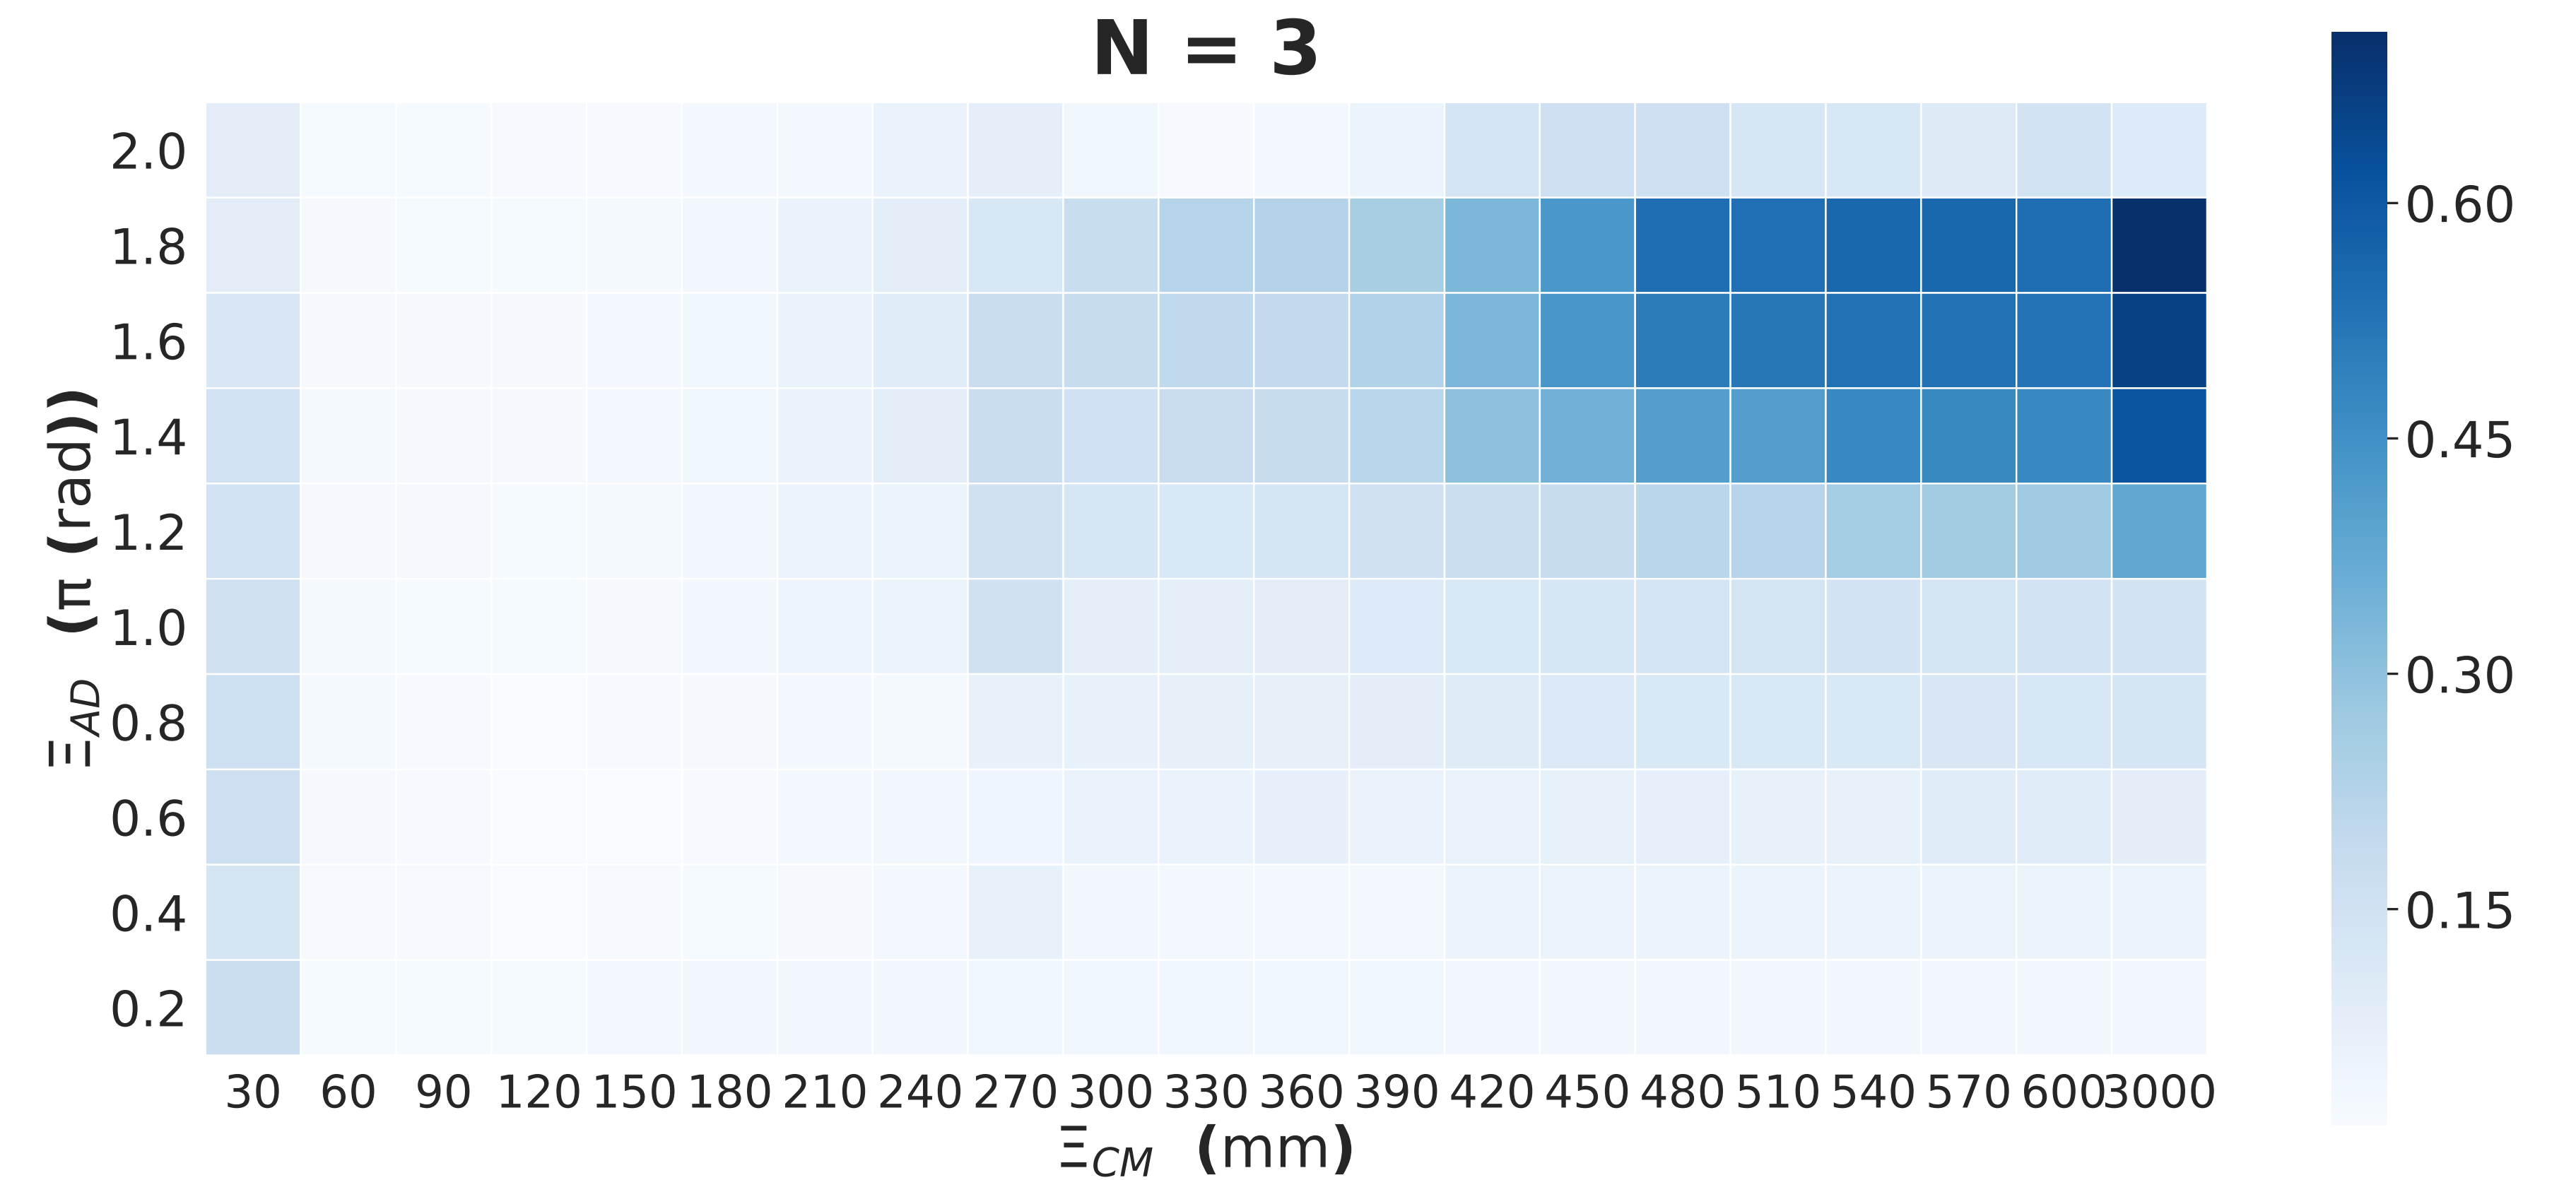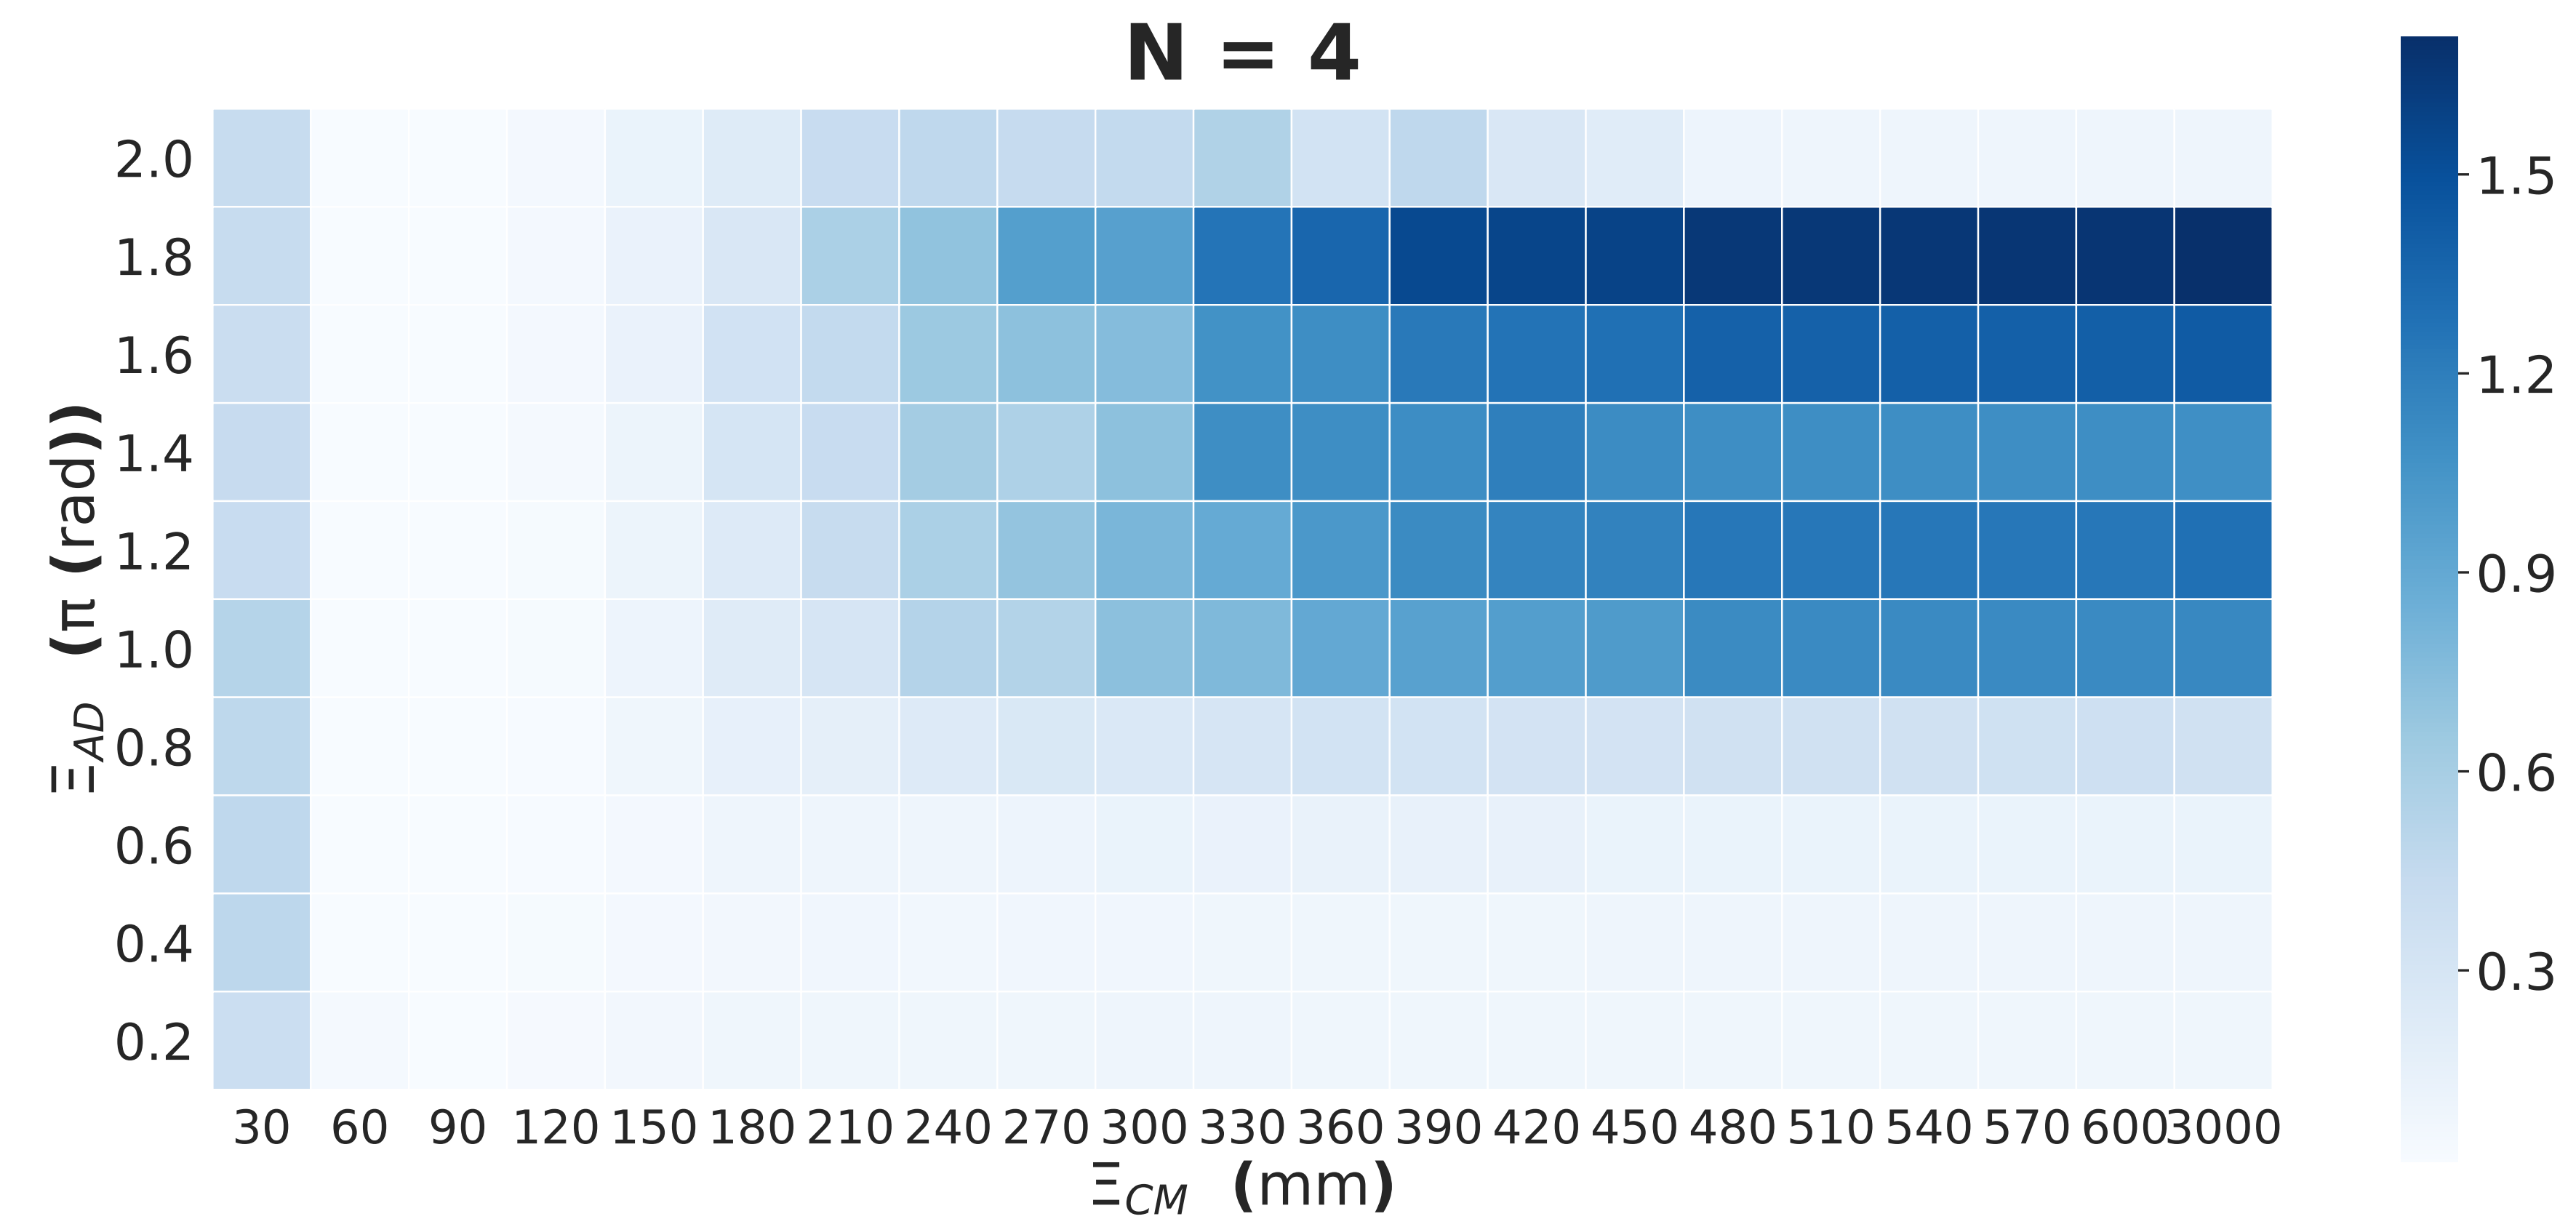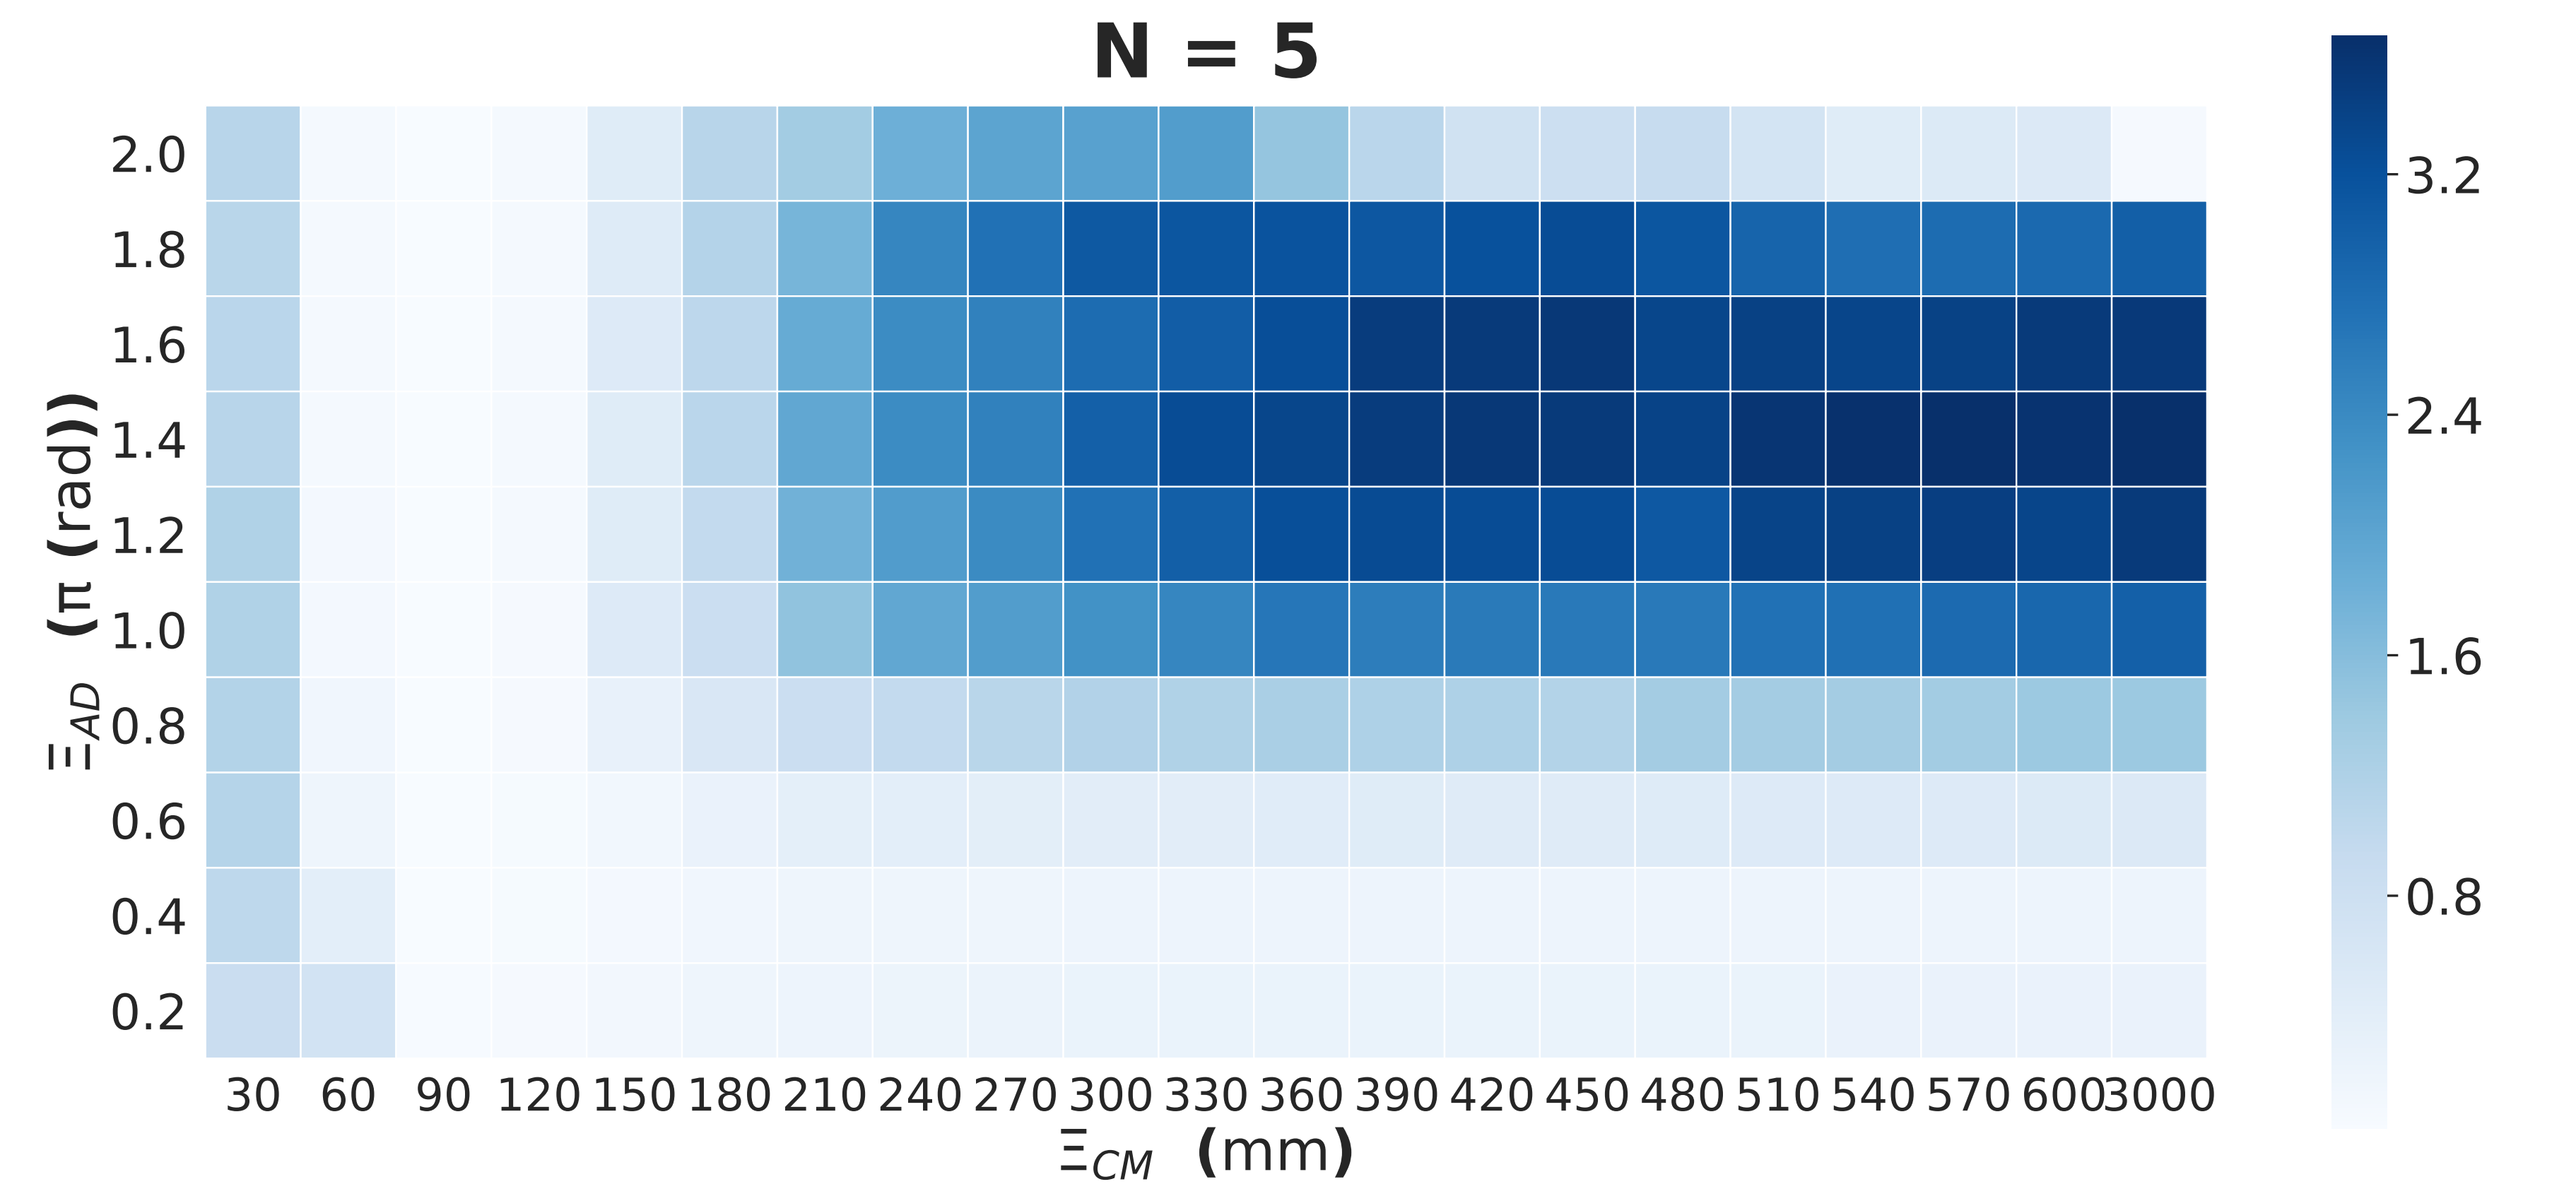

Supplement: s1 [file s1]

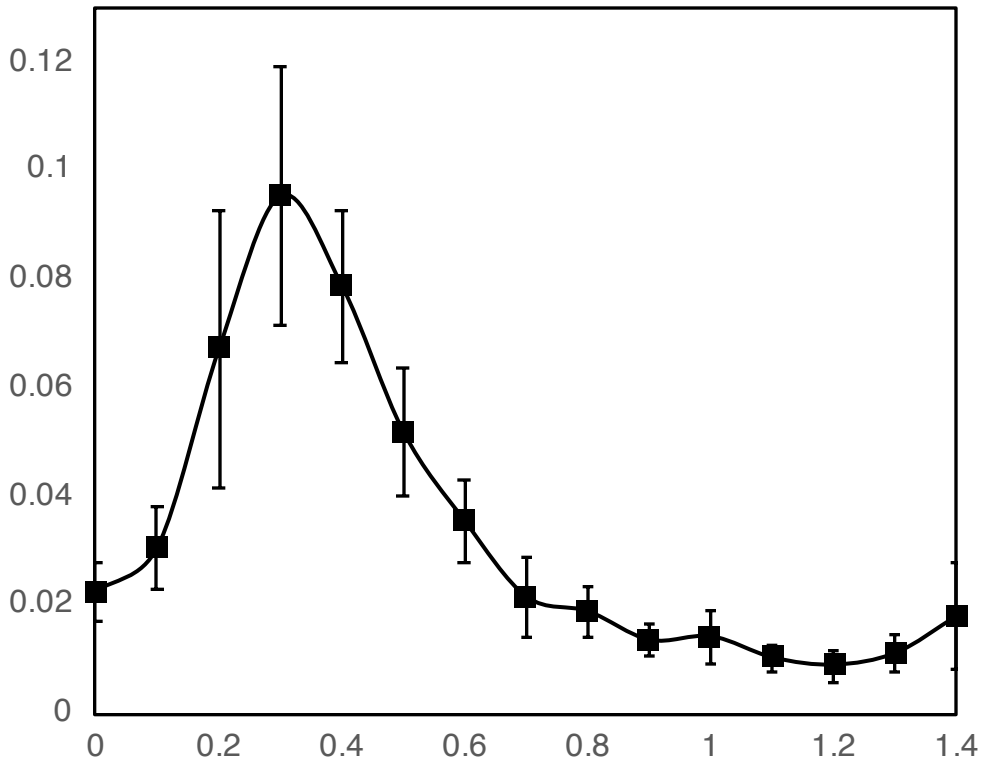

Supplement: s1 [file s1]

dt = 5/120 sec

N=2

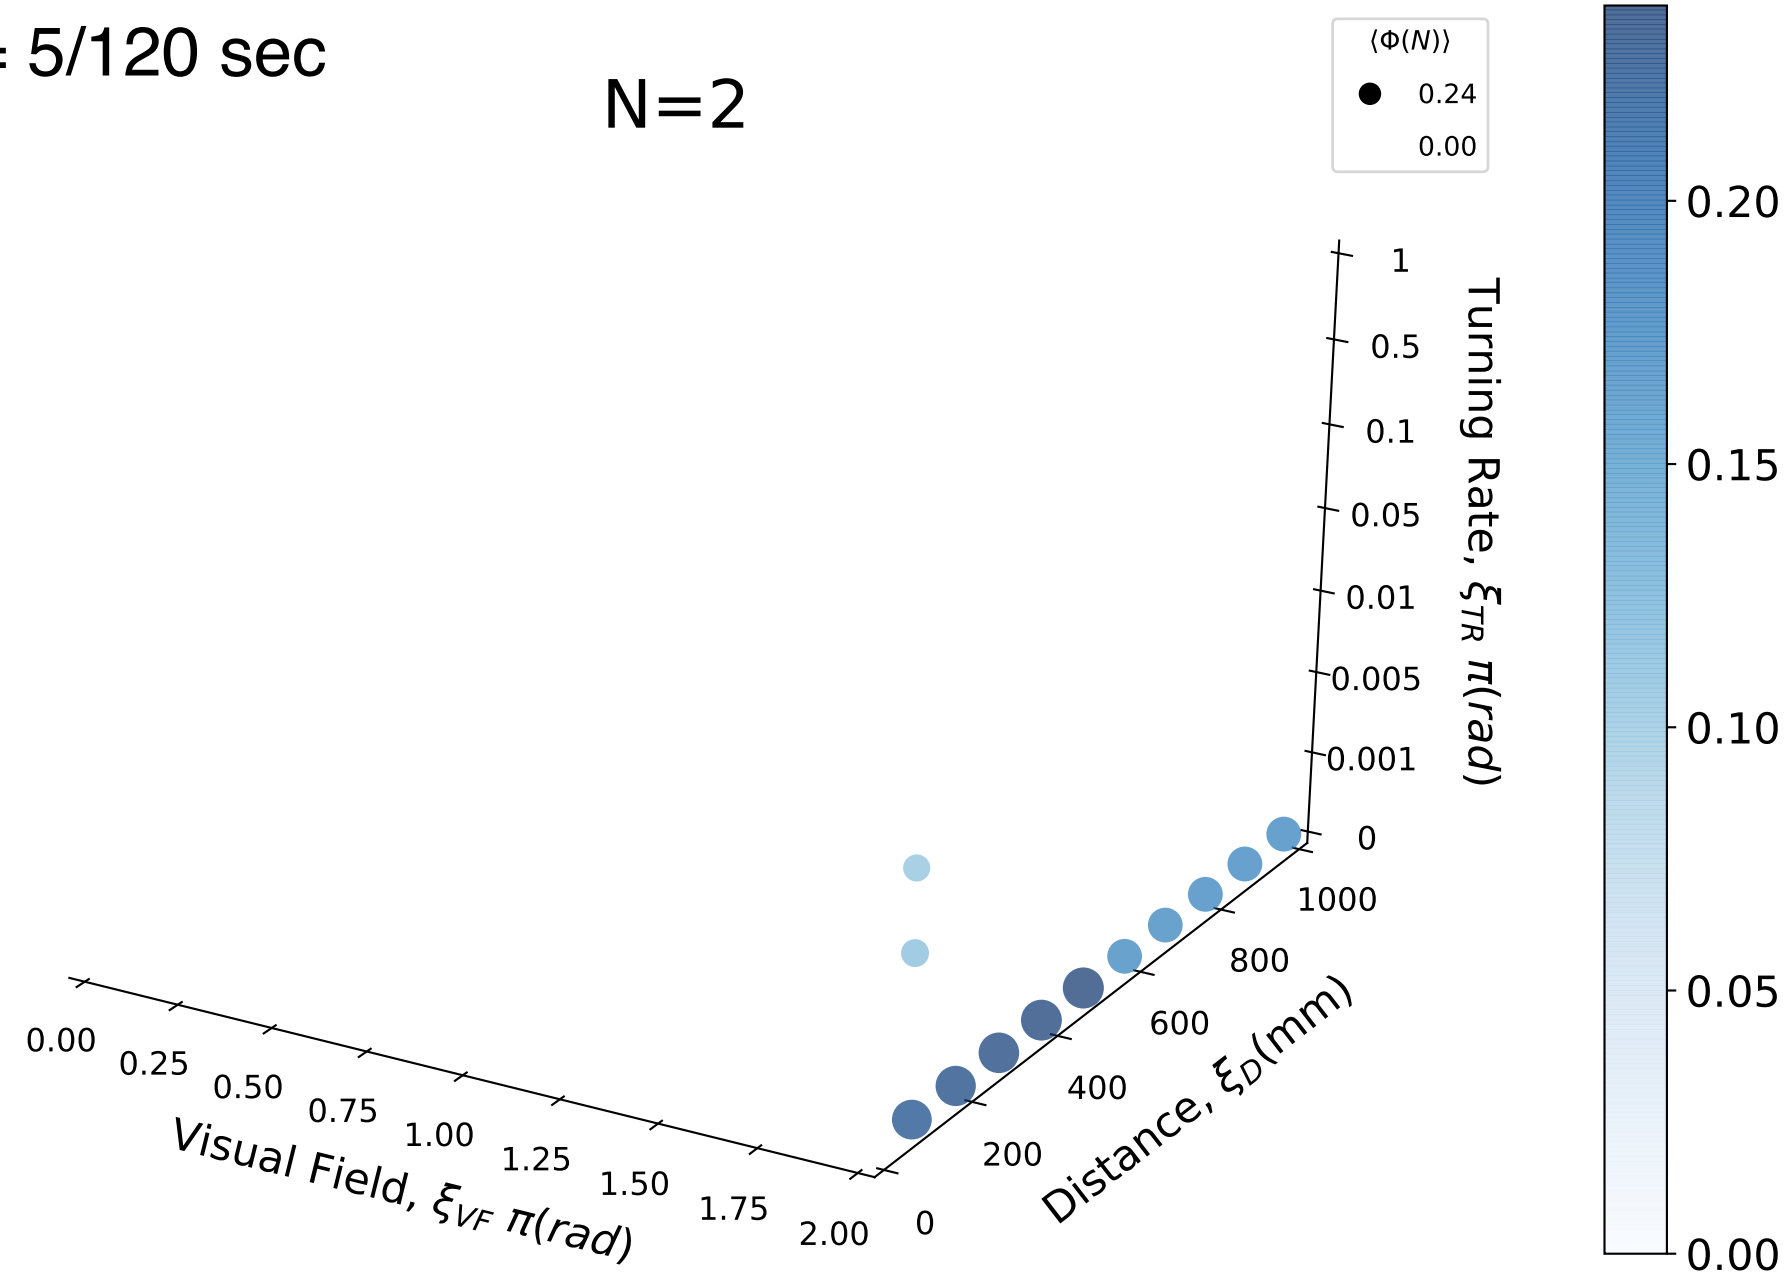

N=3

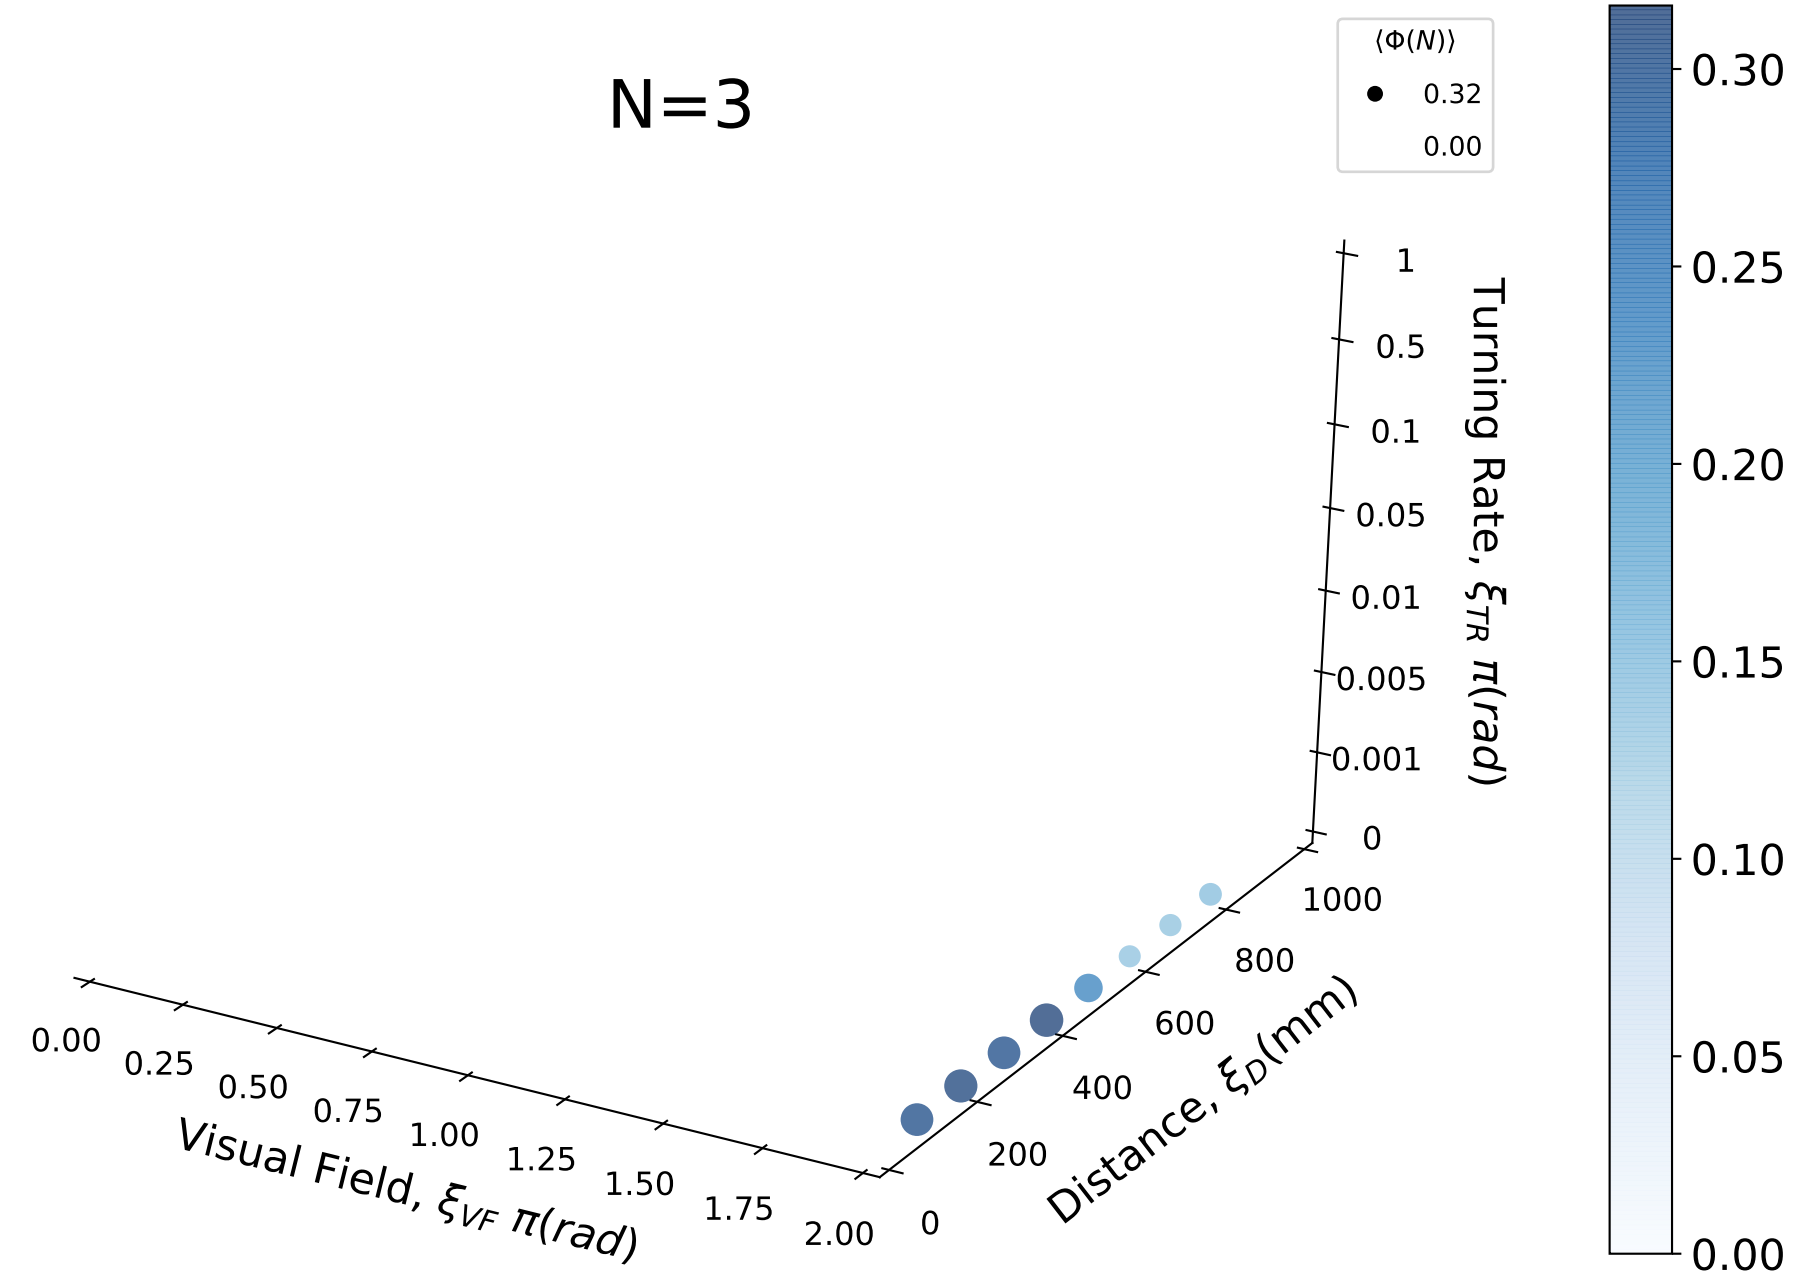

N=4

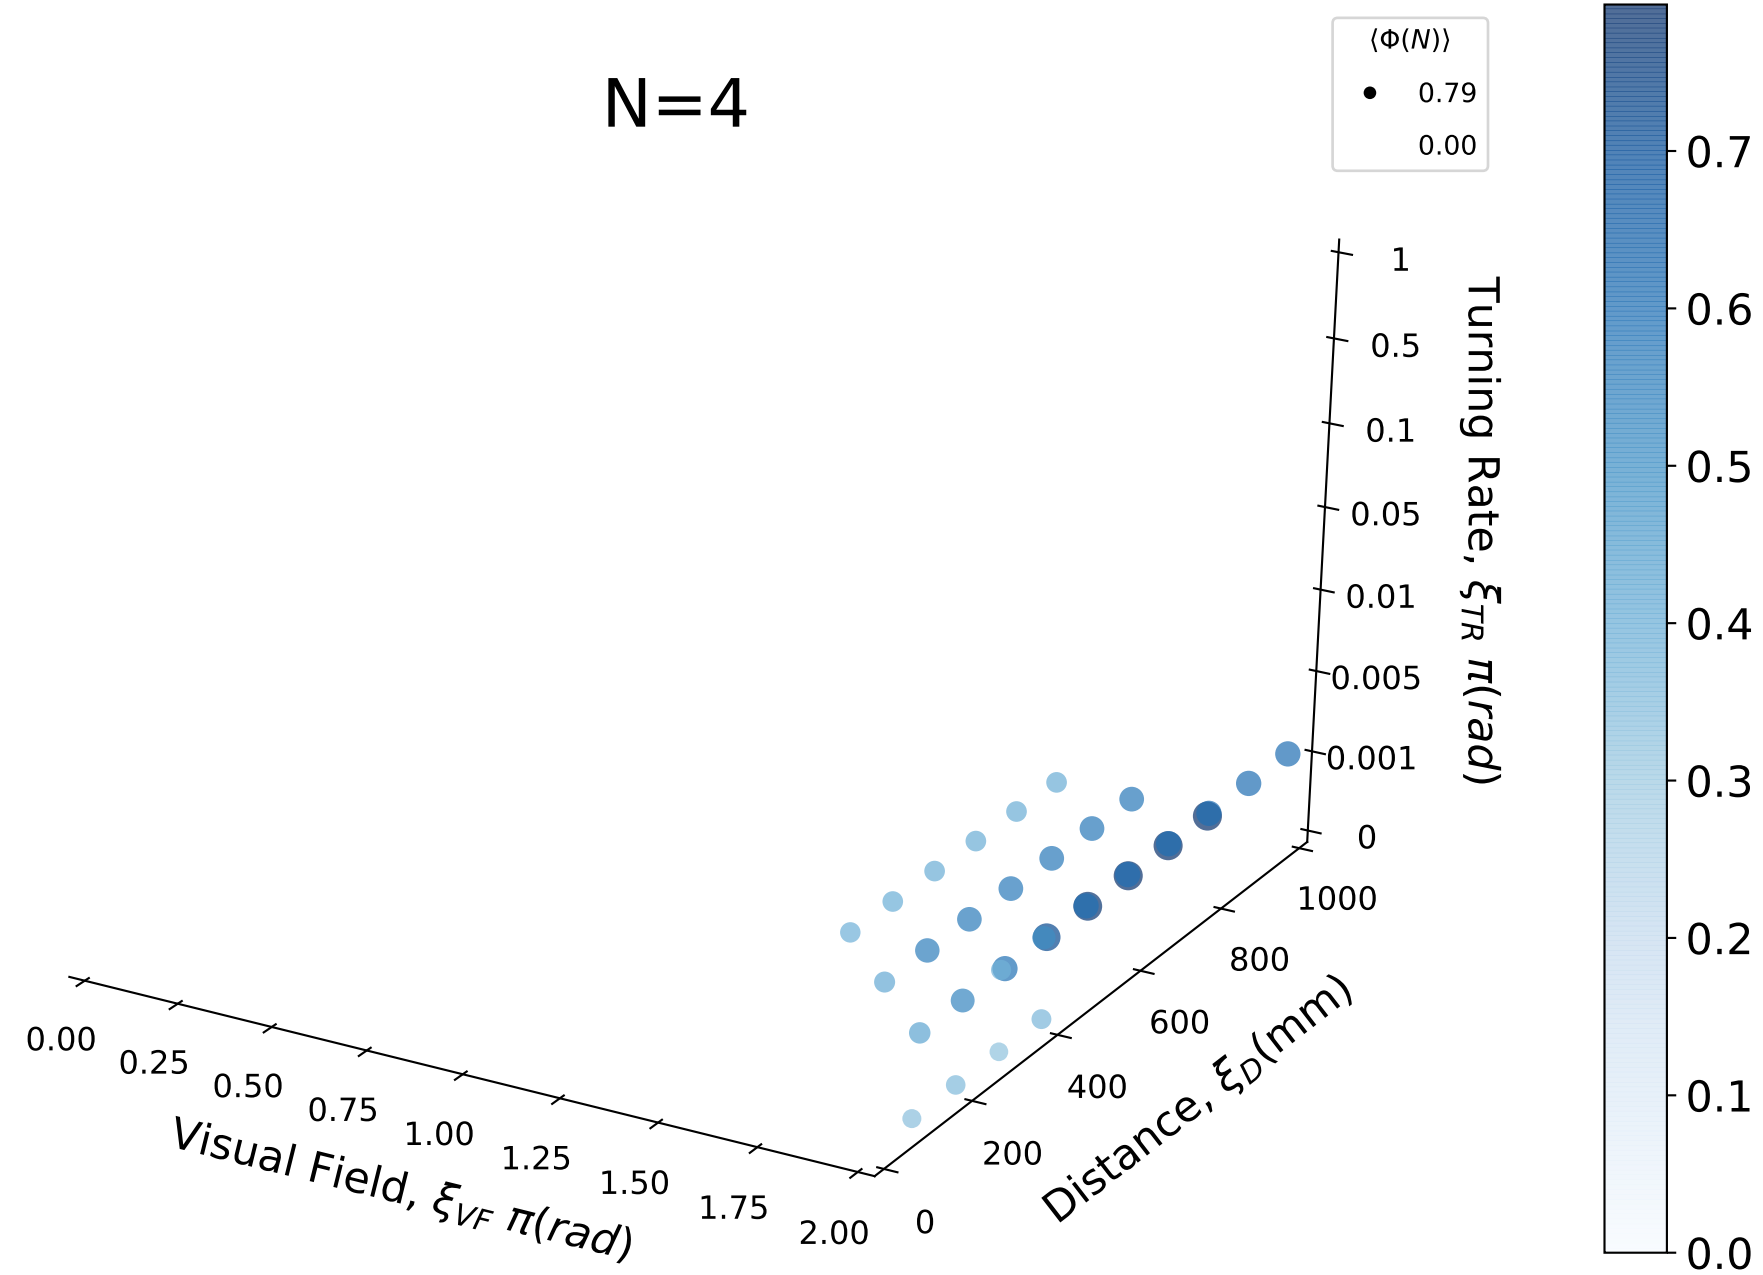

N=5

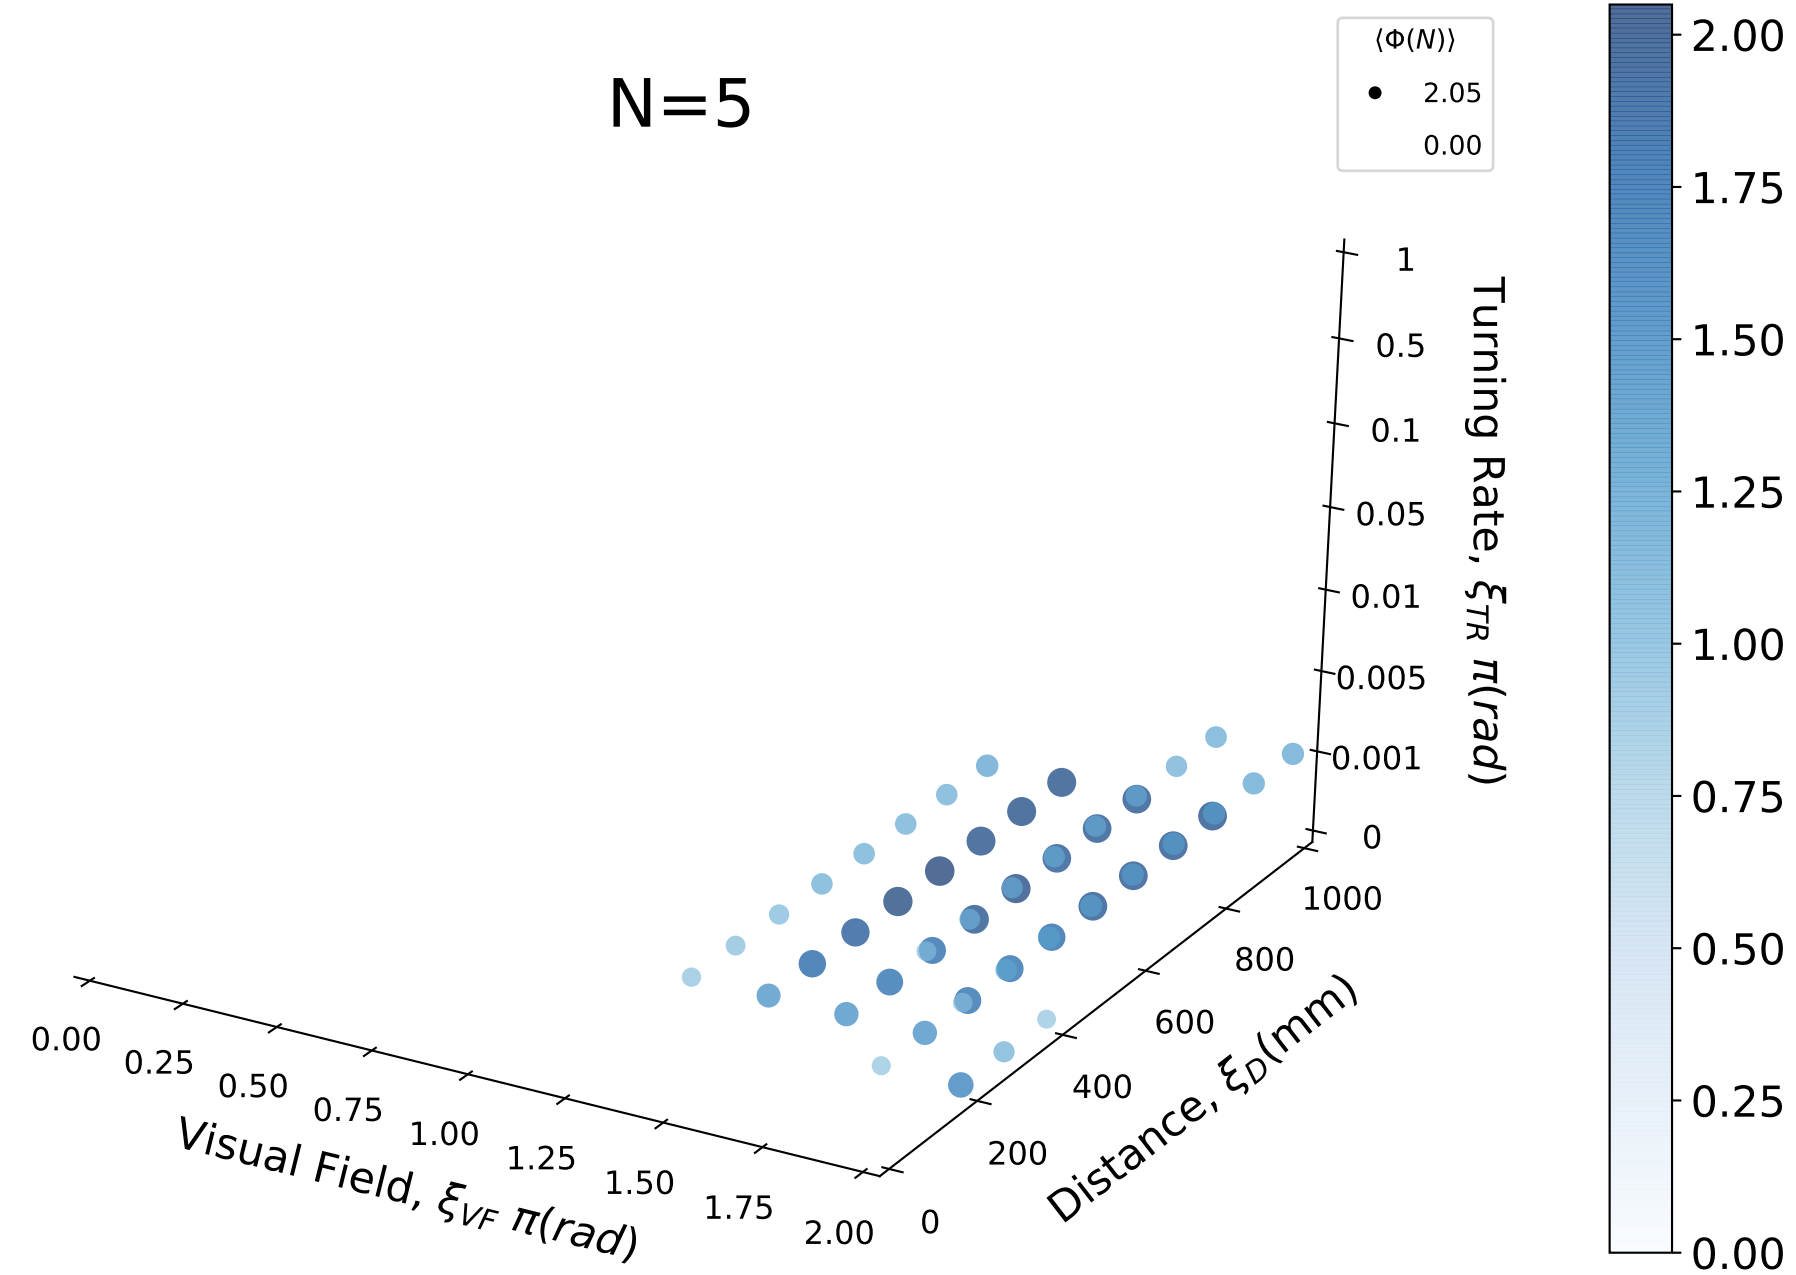

dt = 10/120 sec

N=2

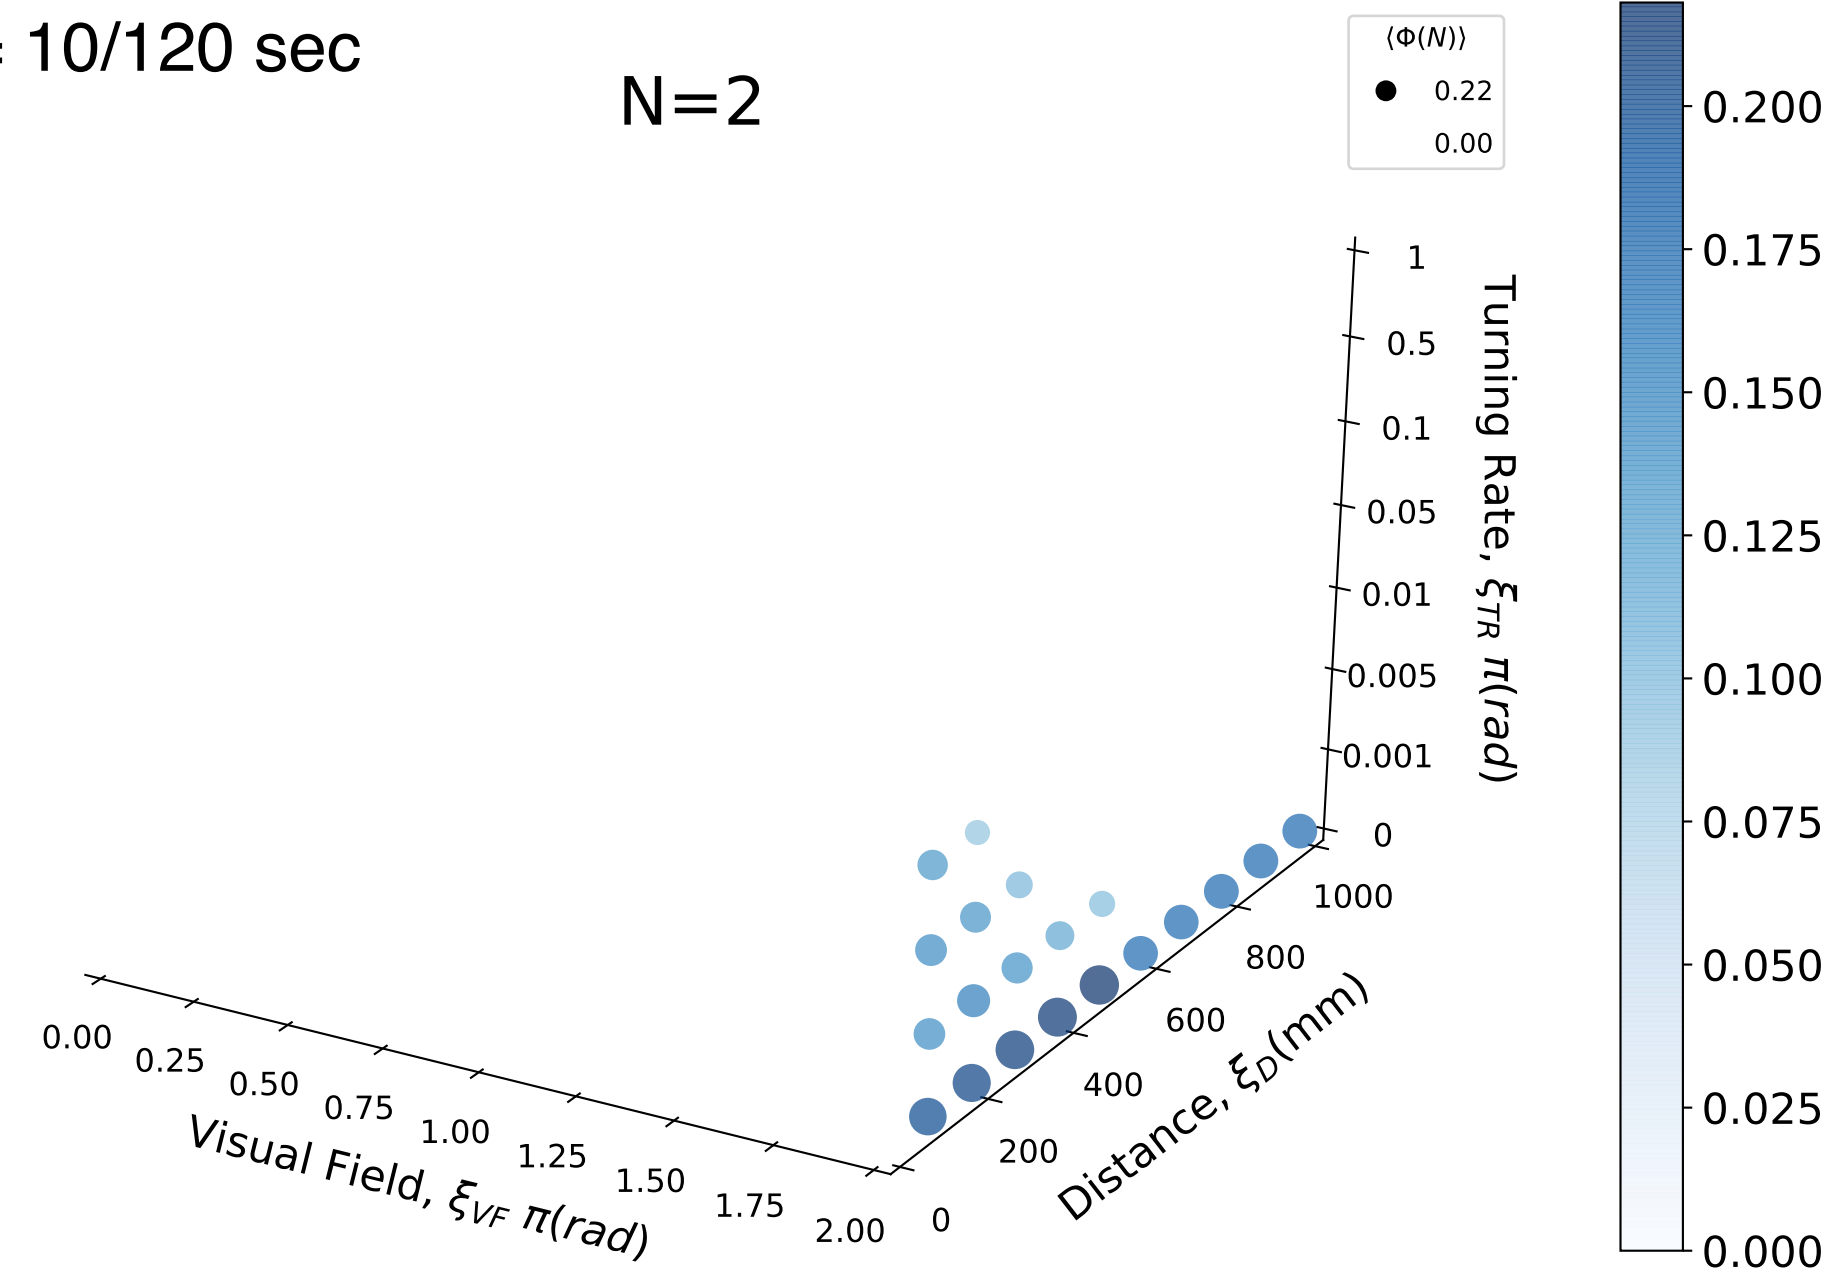

N=3

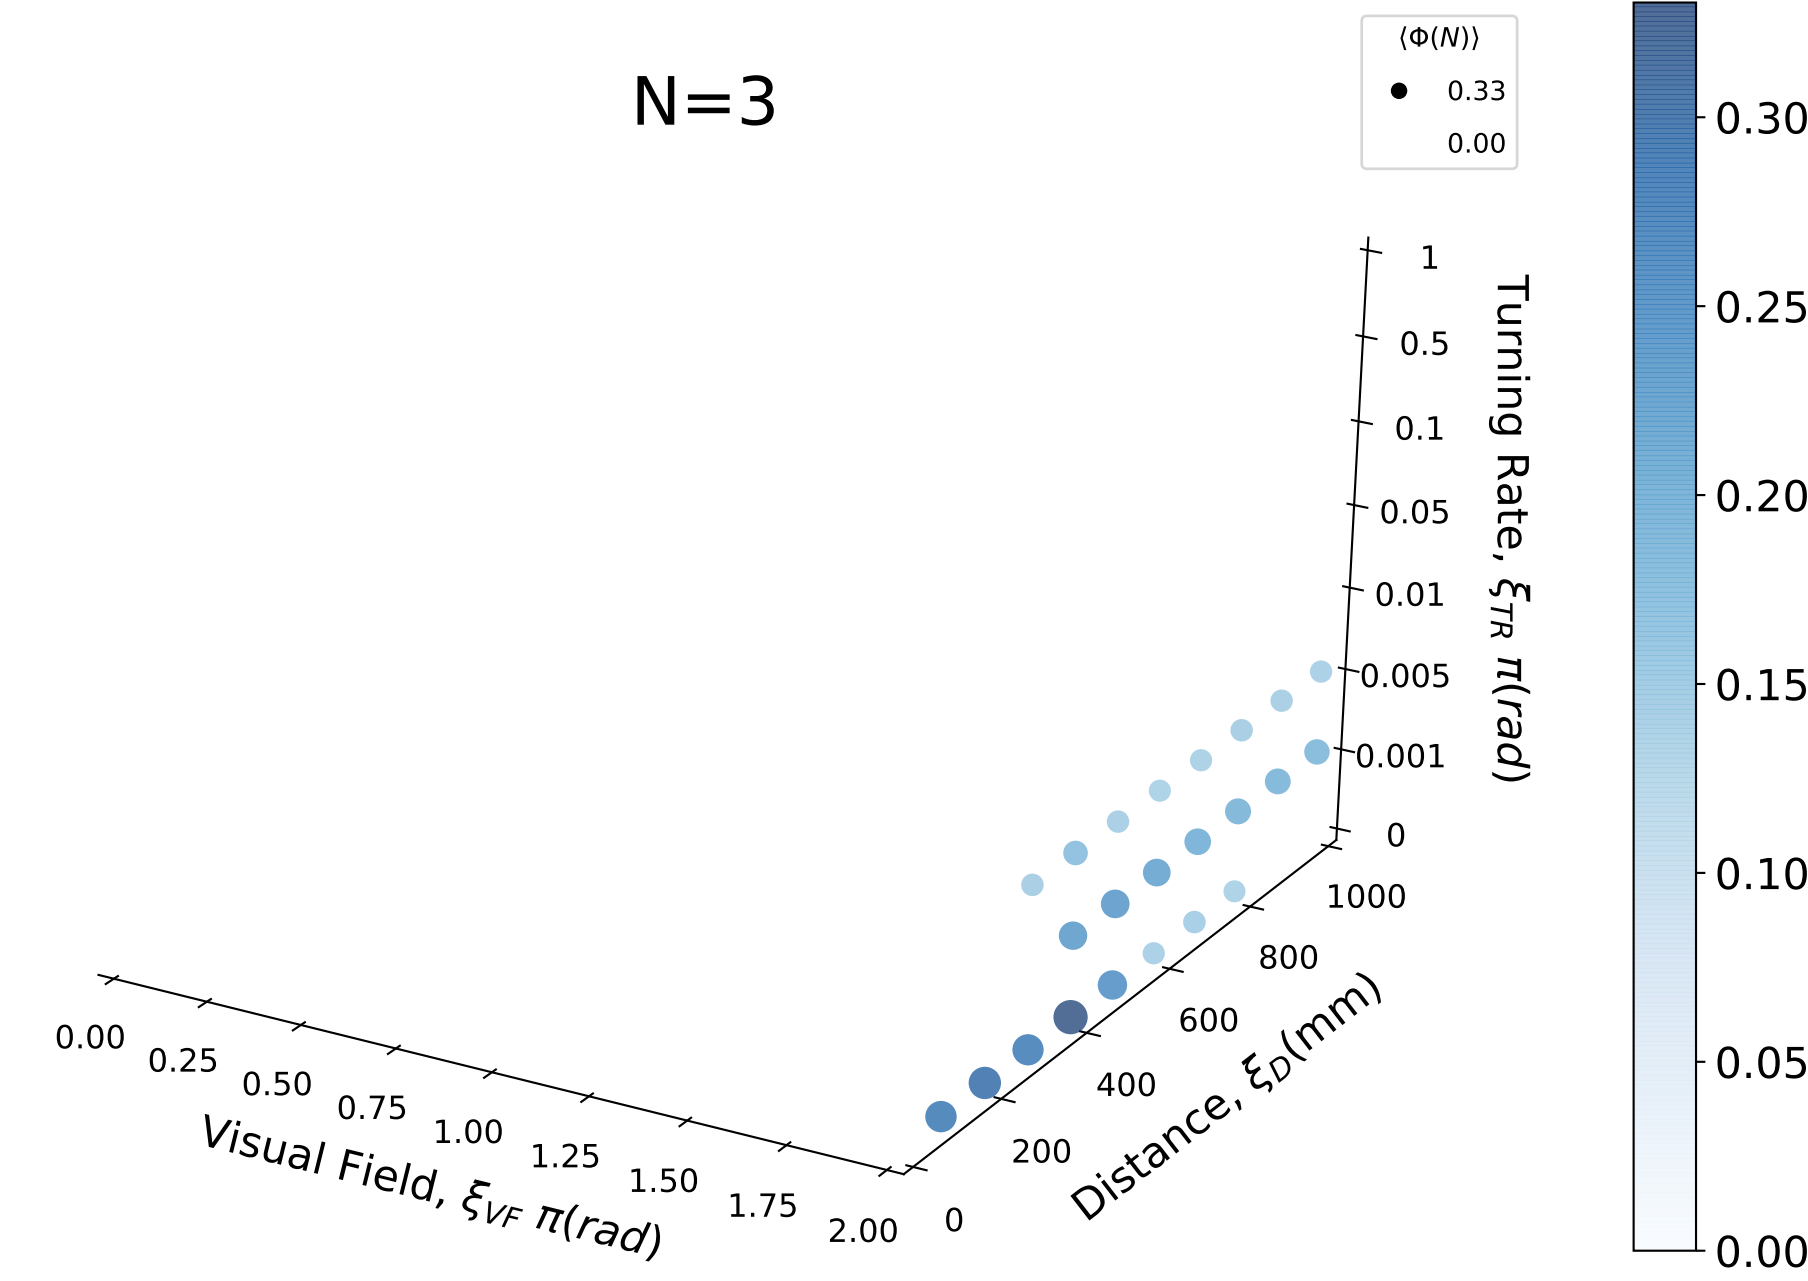

N=4

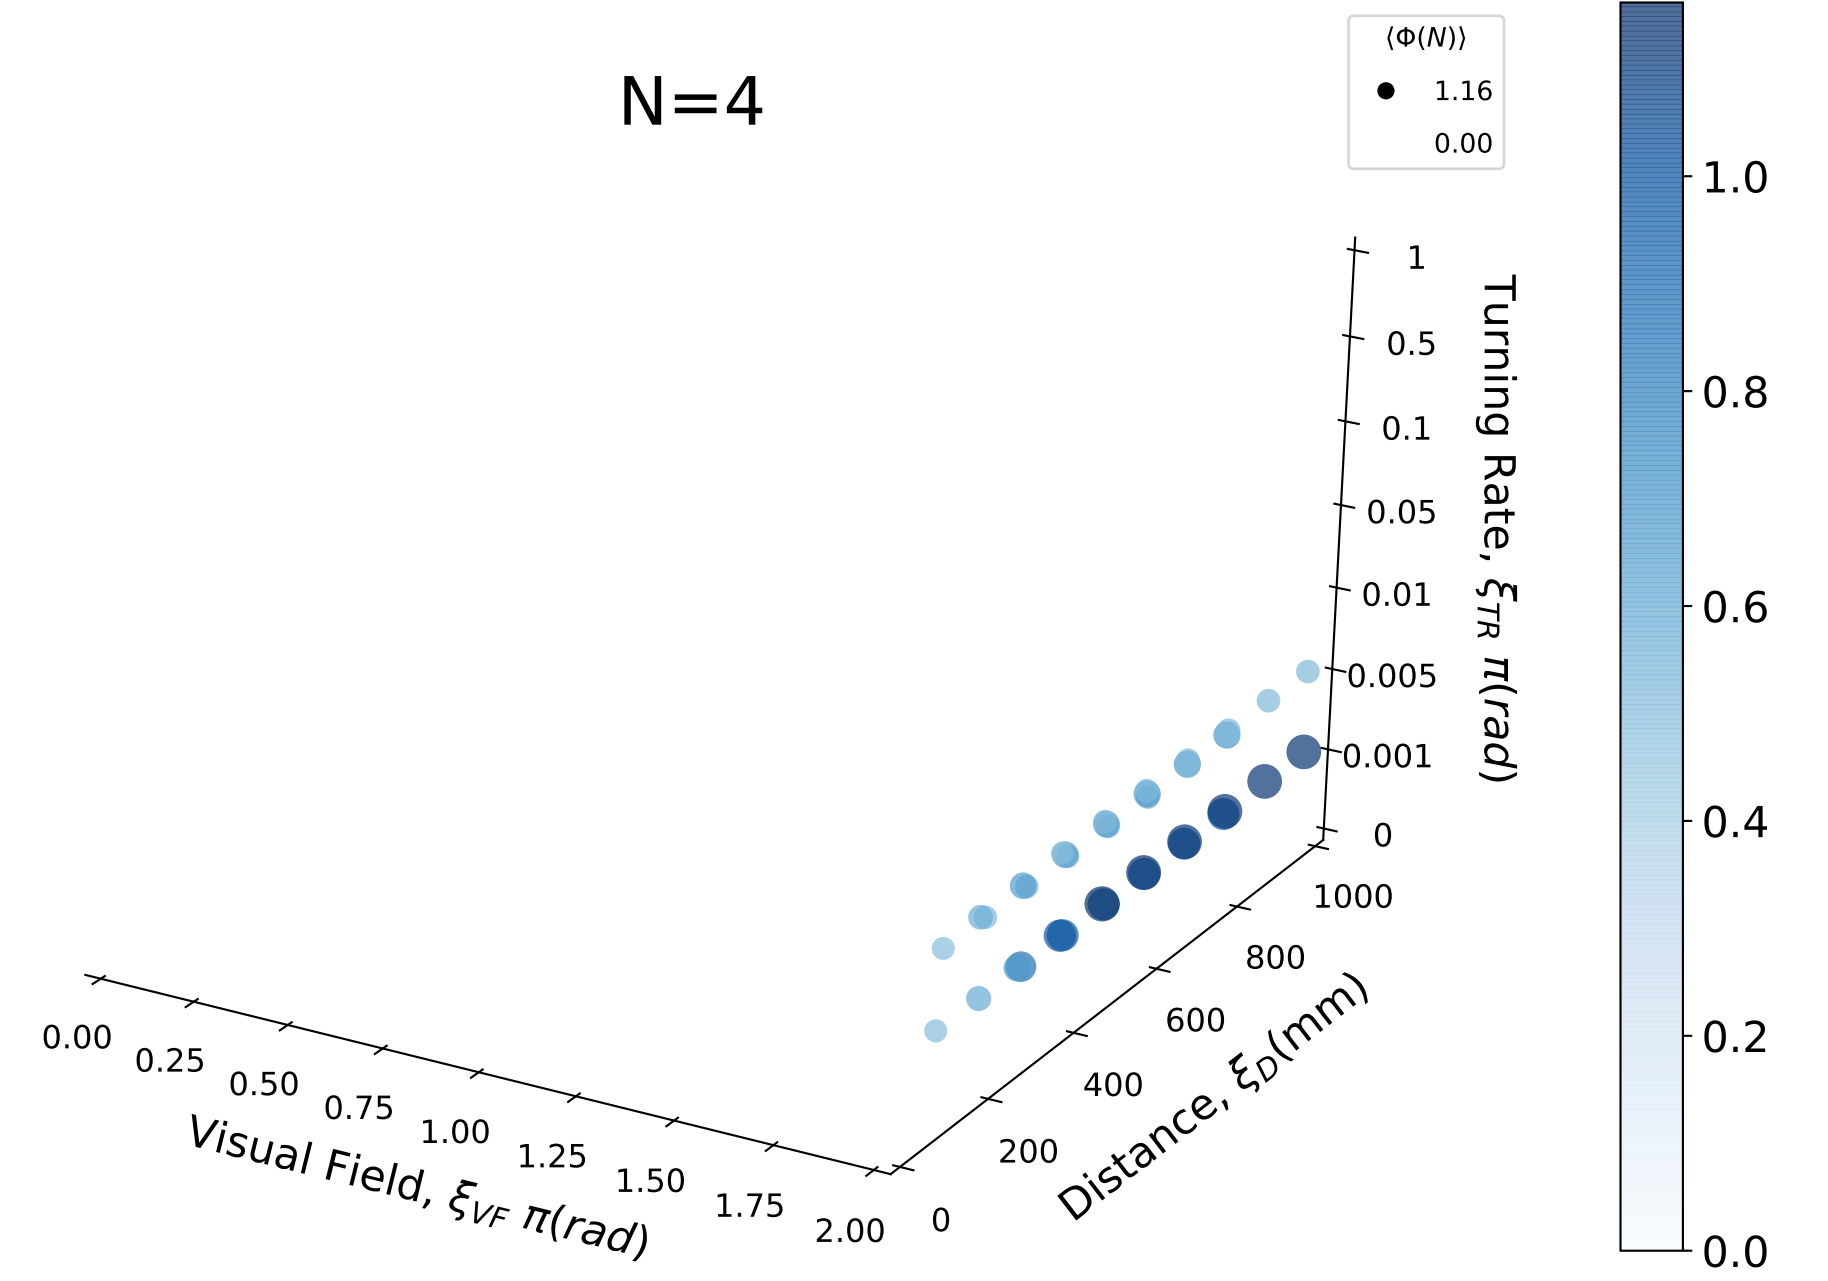

N=5

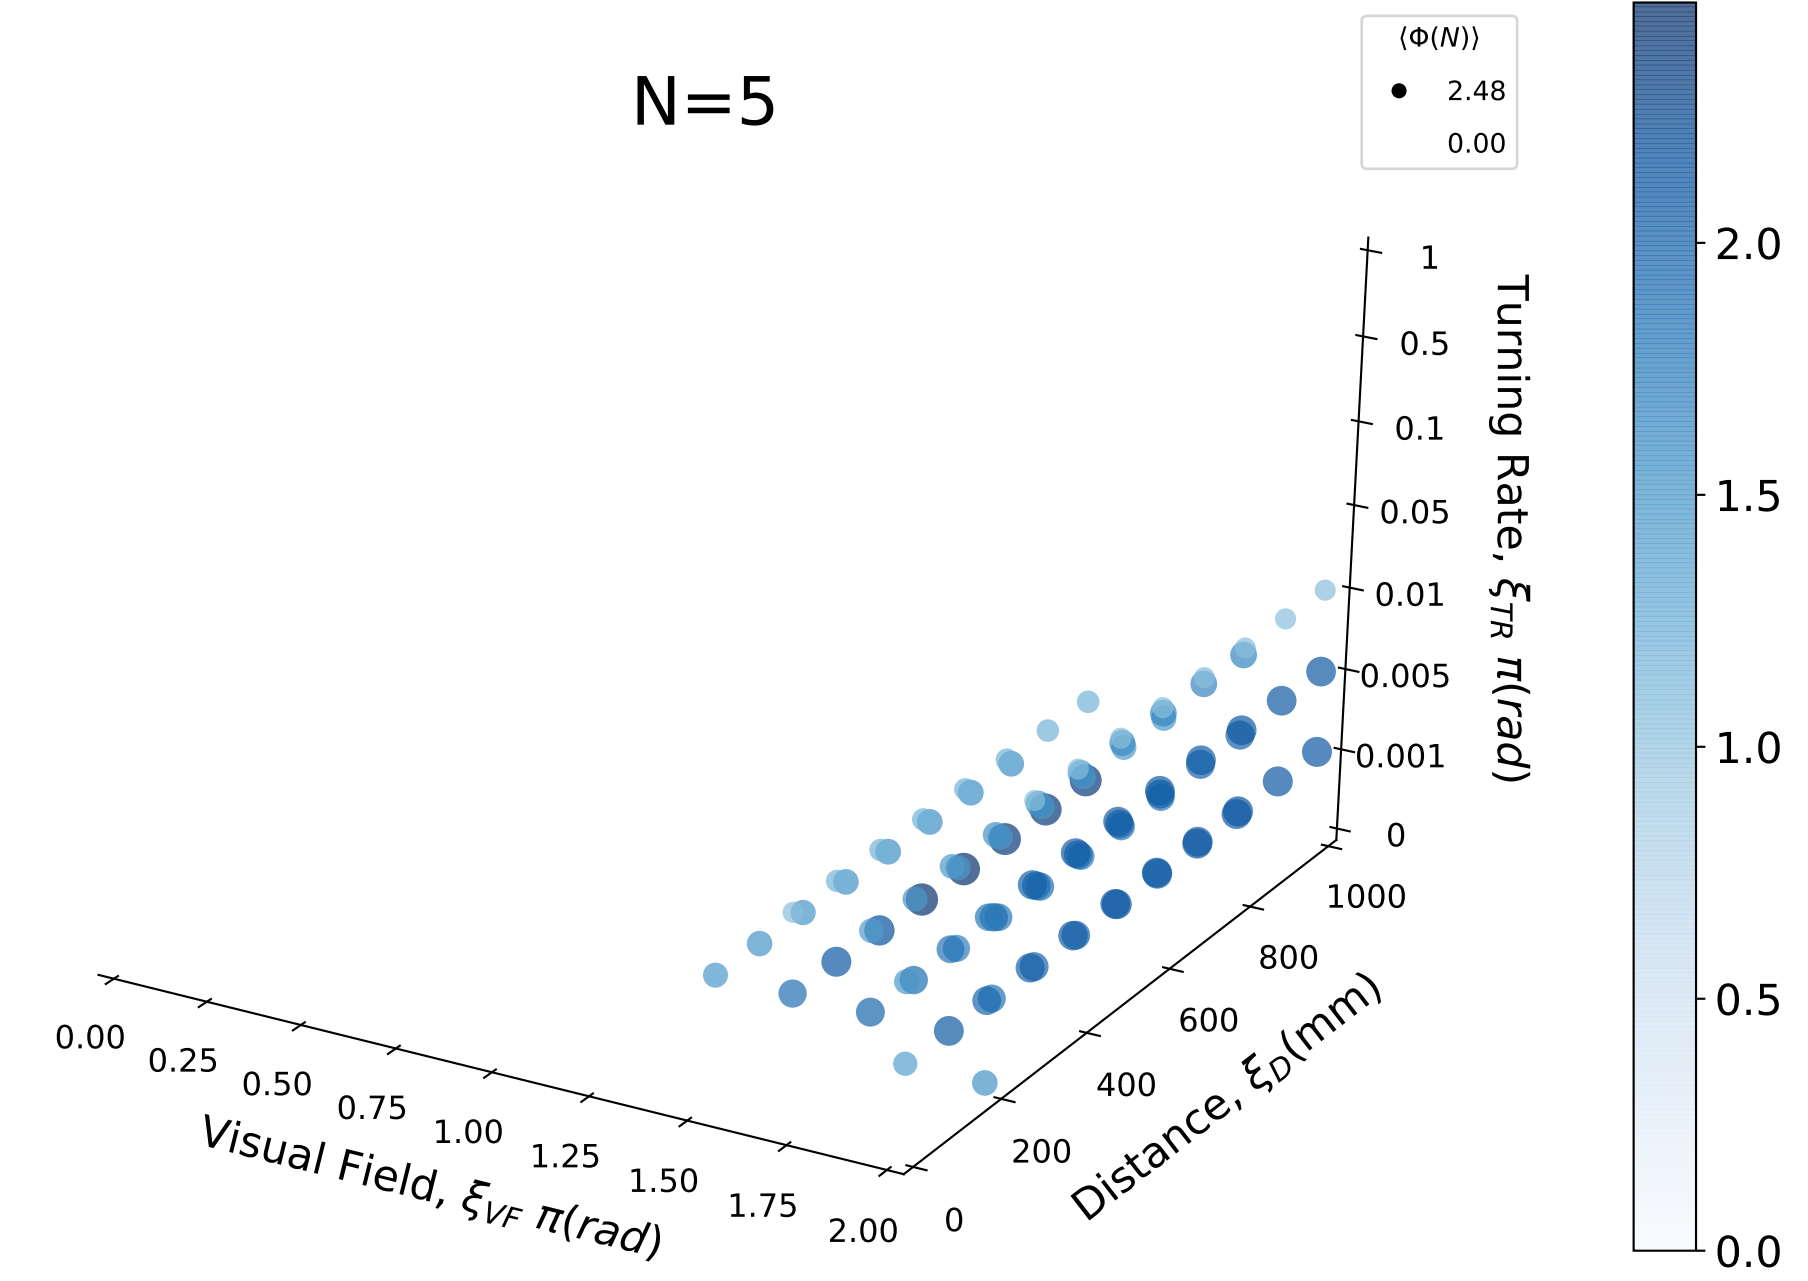

dt = 20/120 sec

N=2

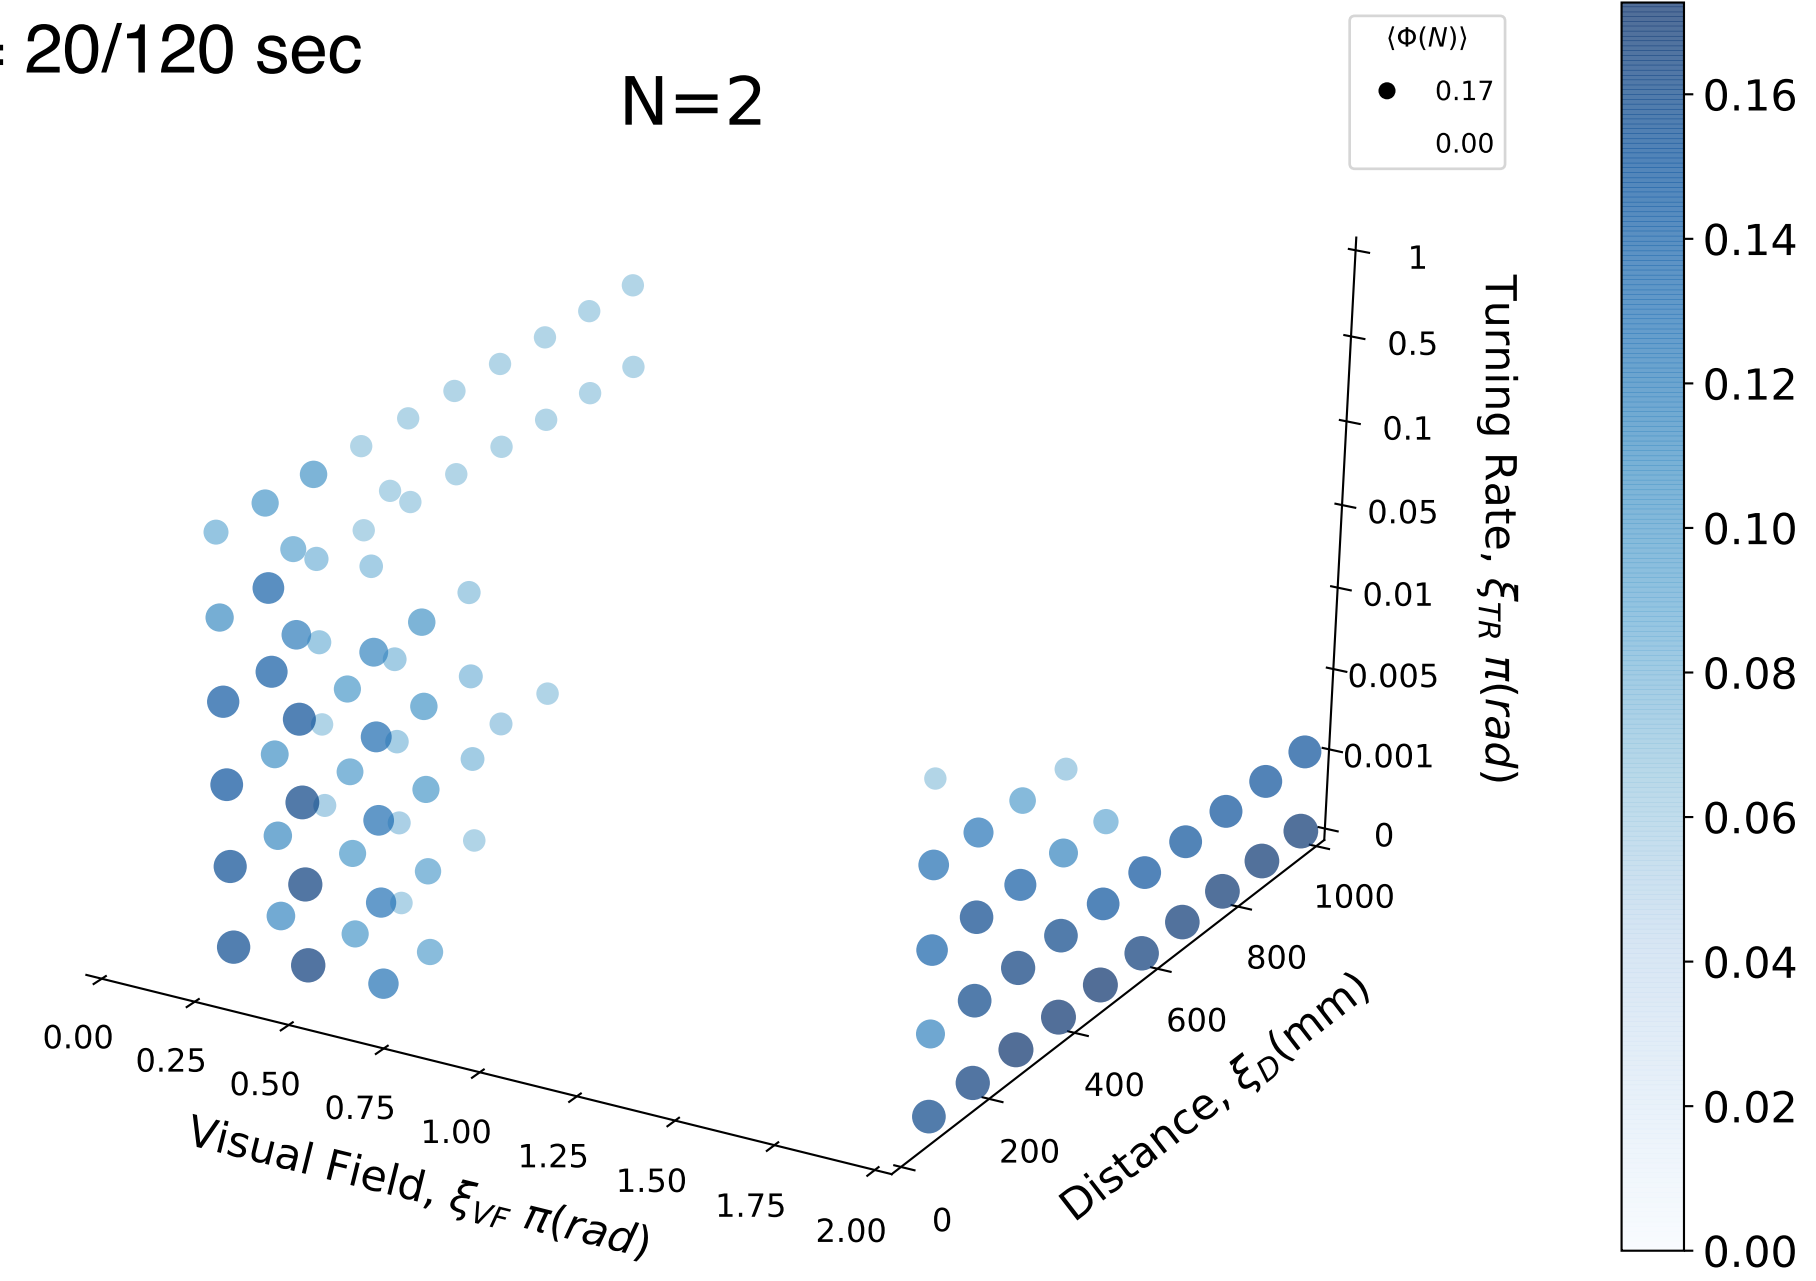

N=3

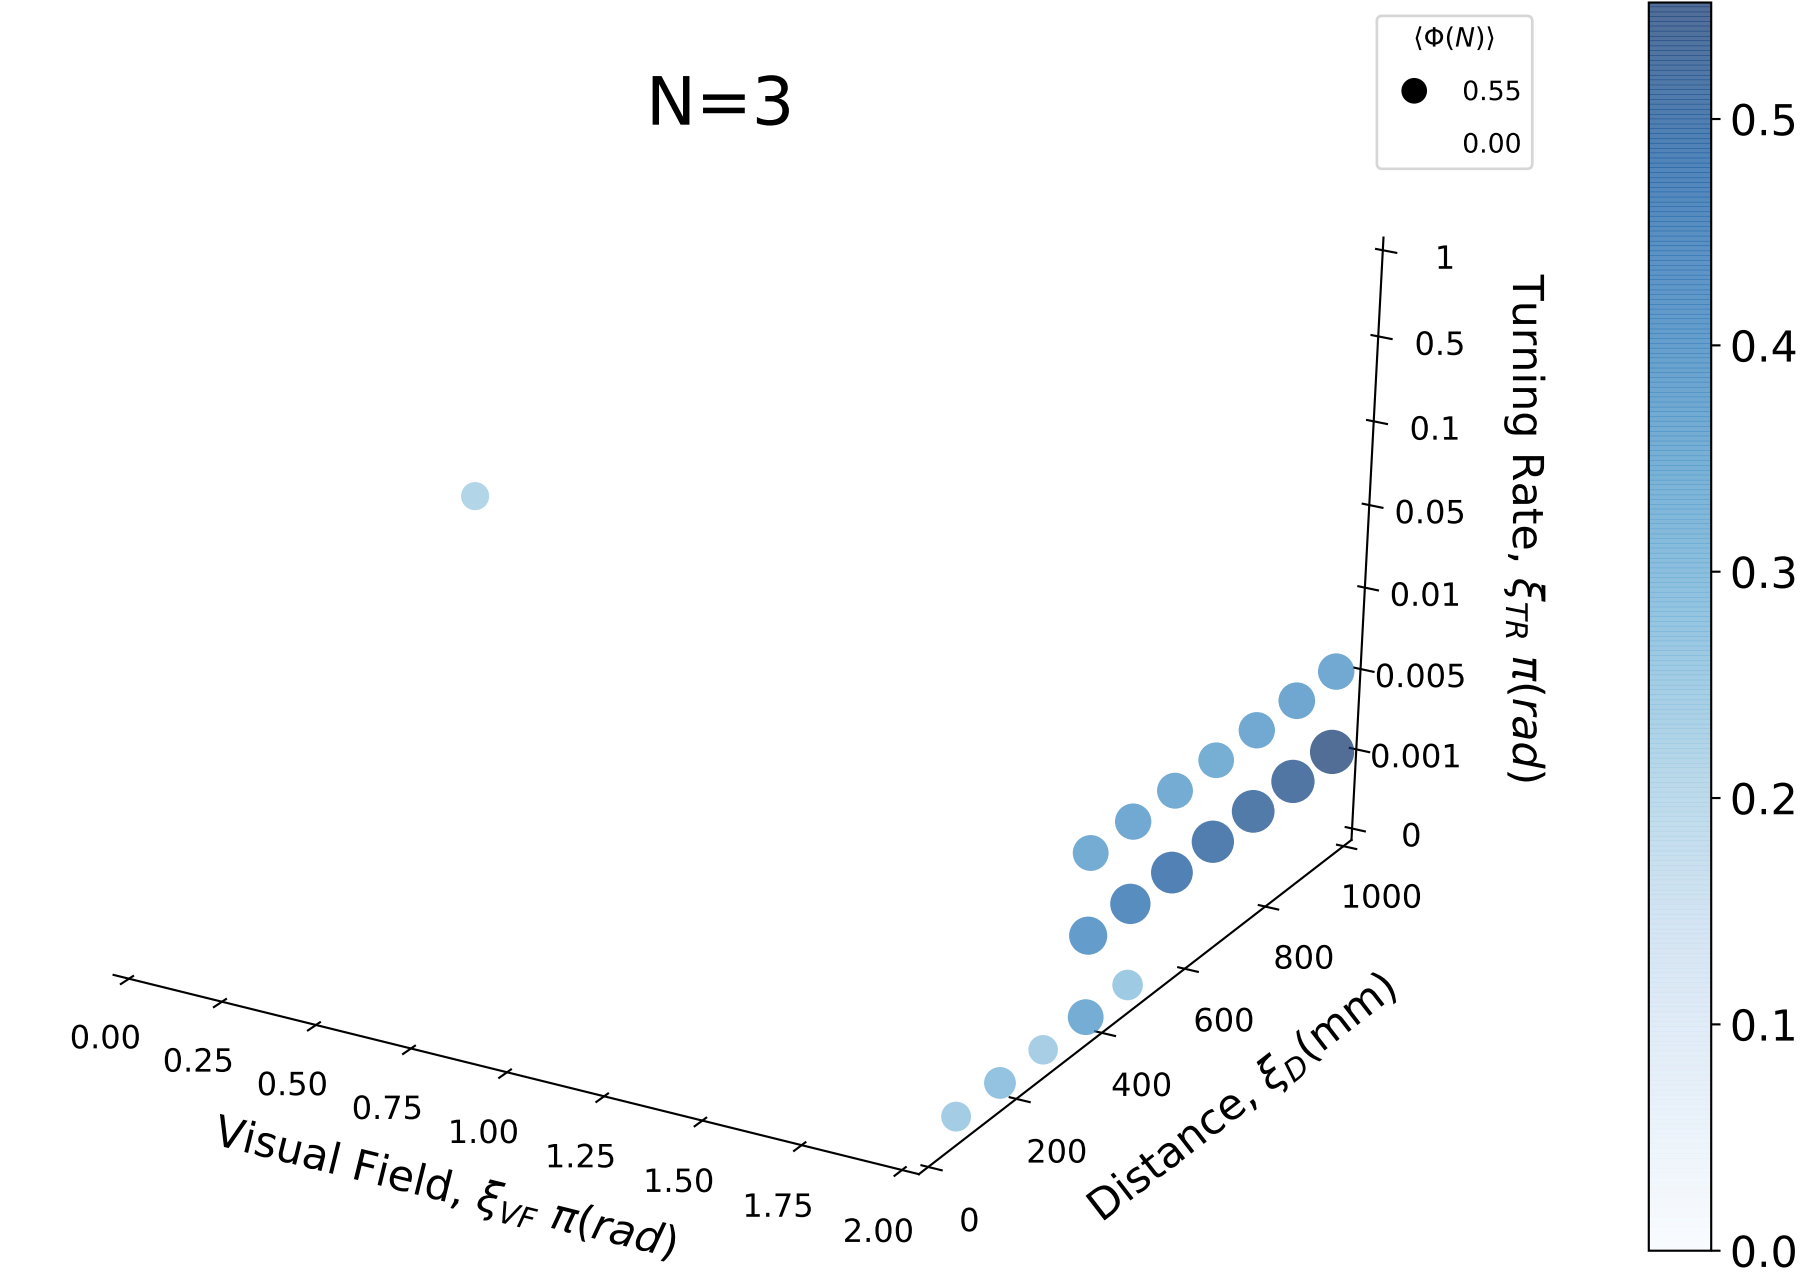

N=4

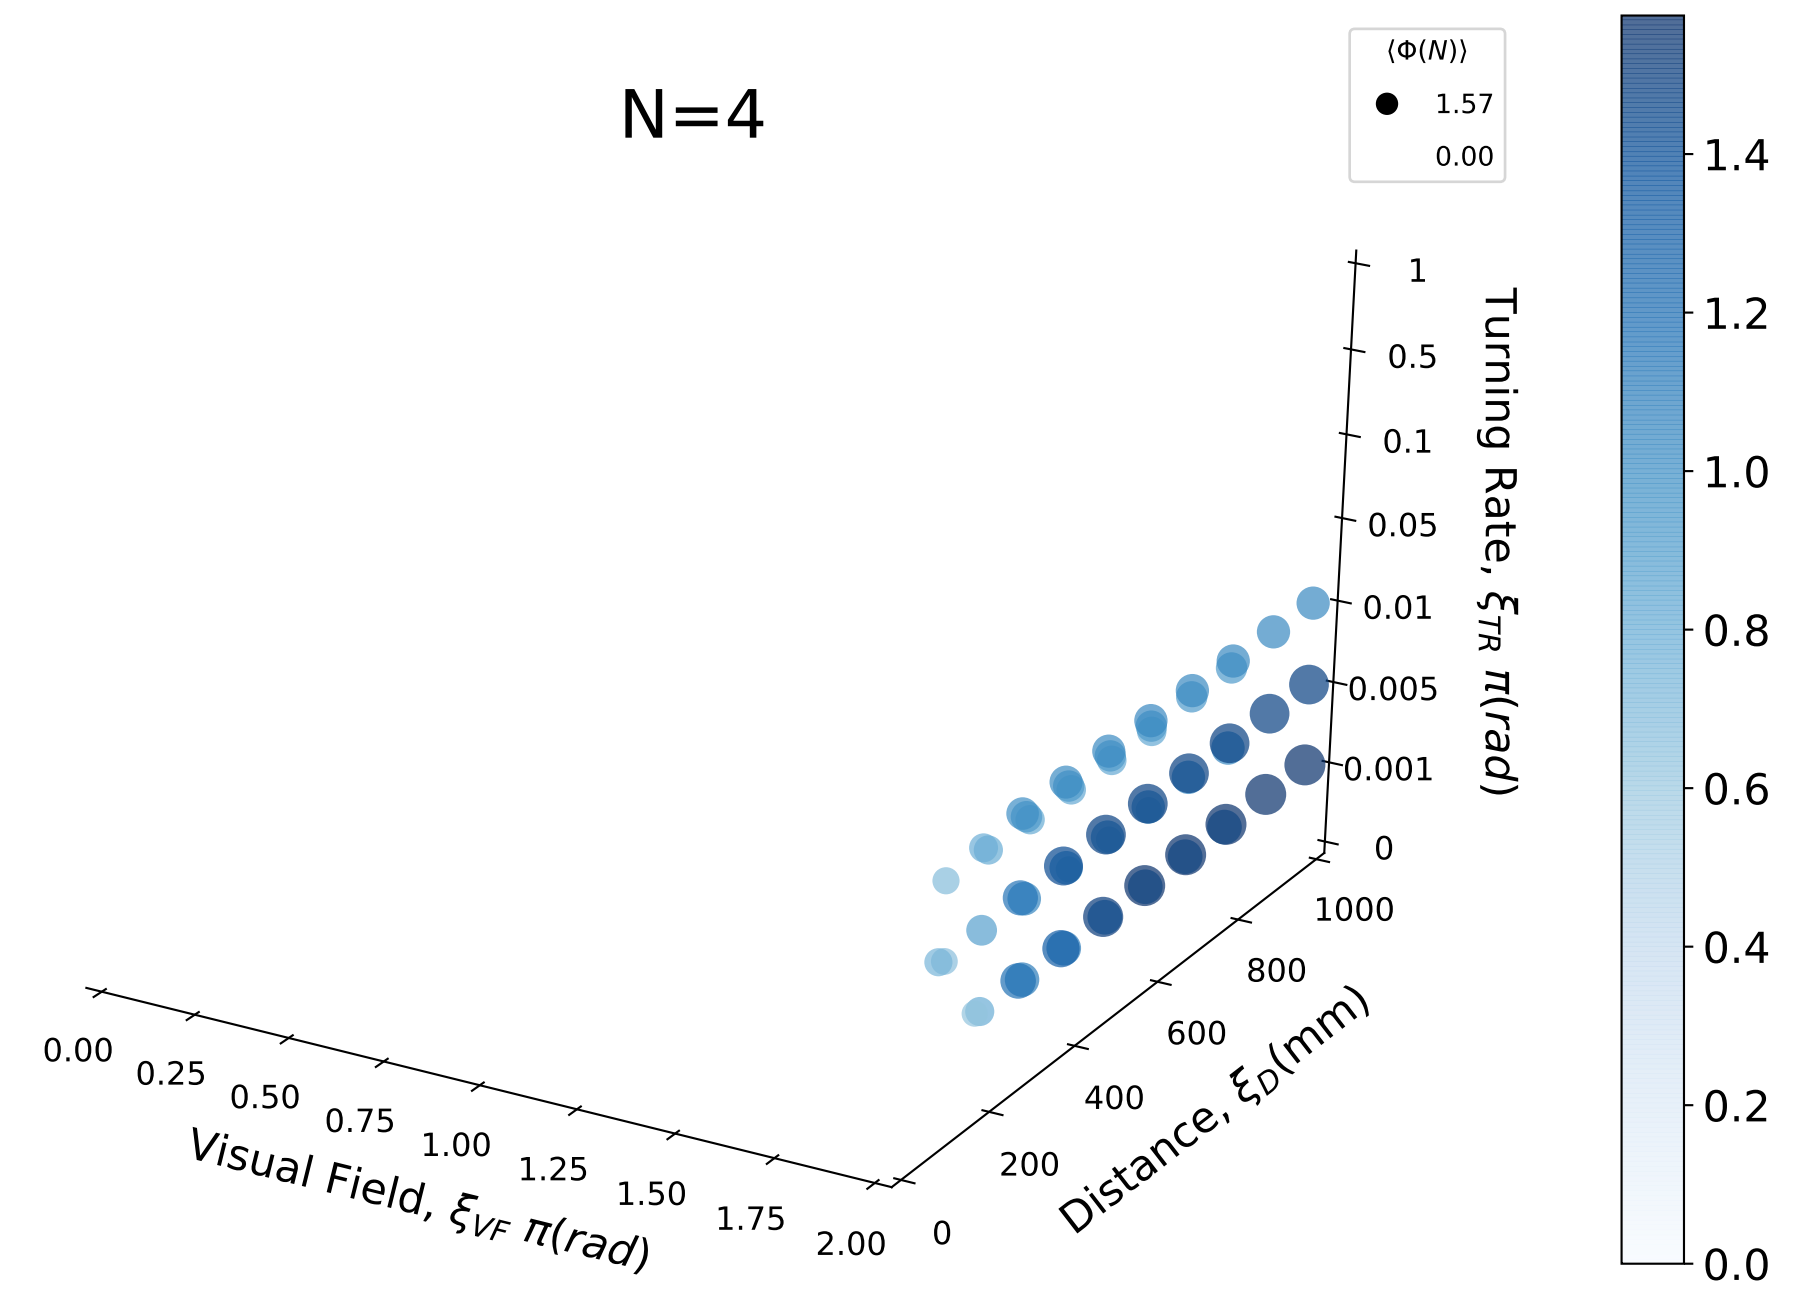

N=5

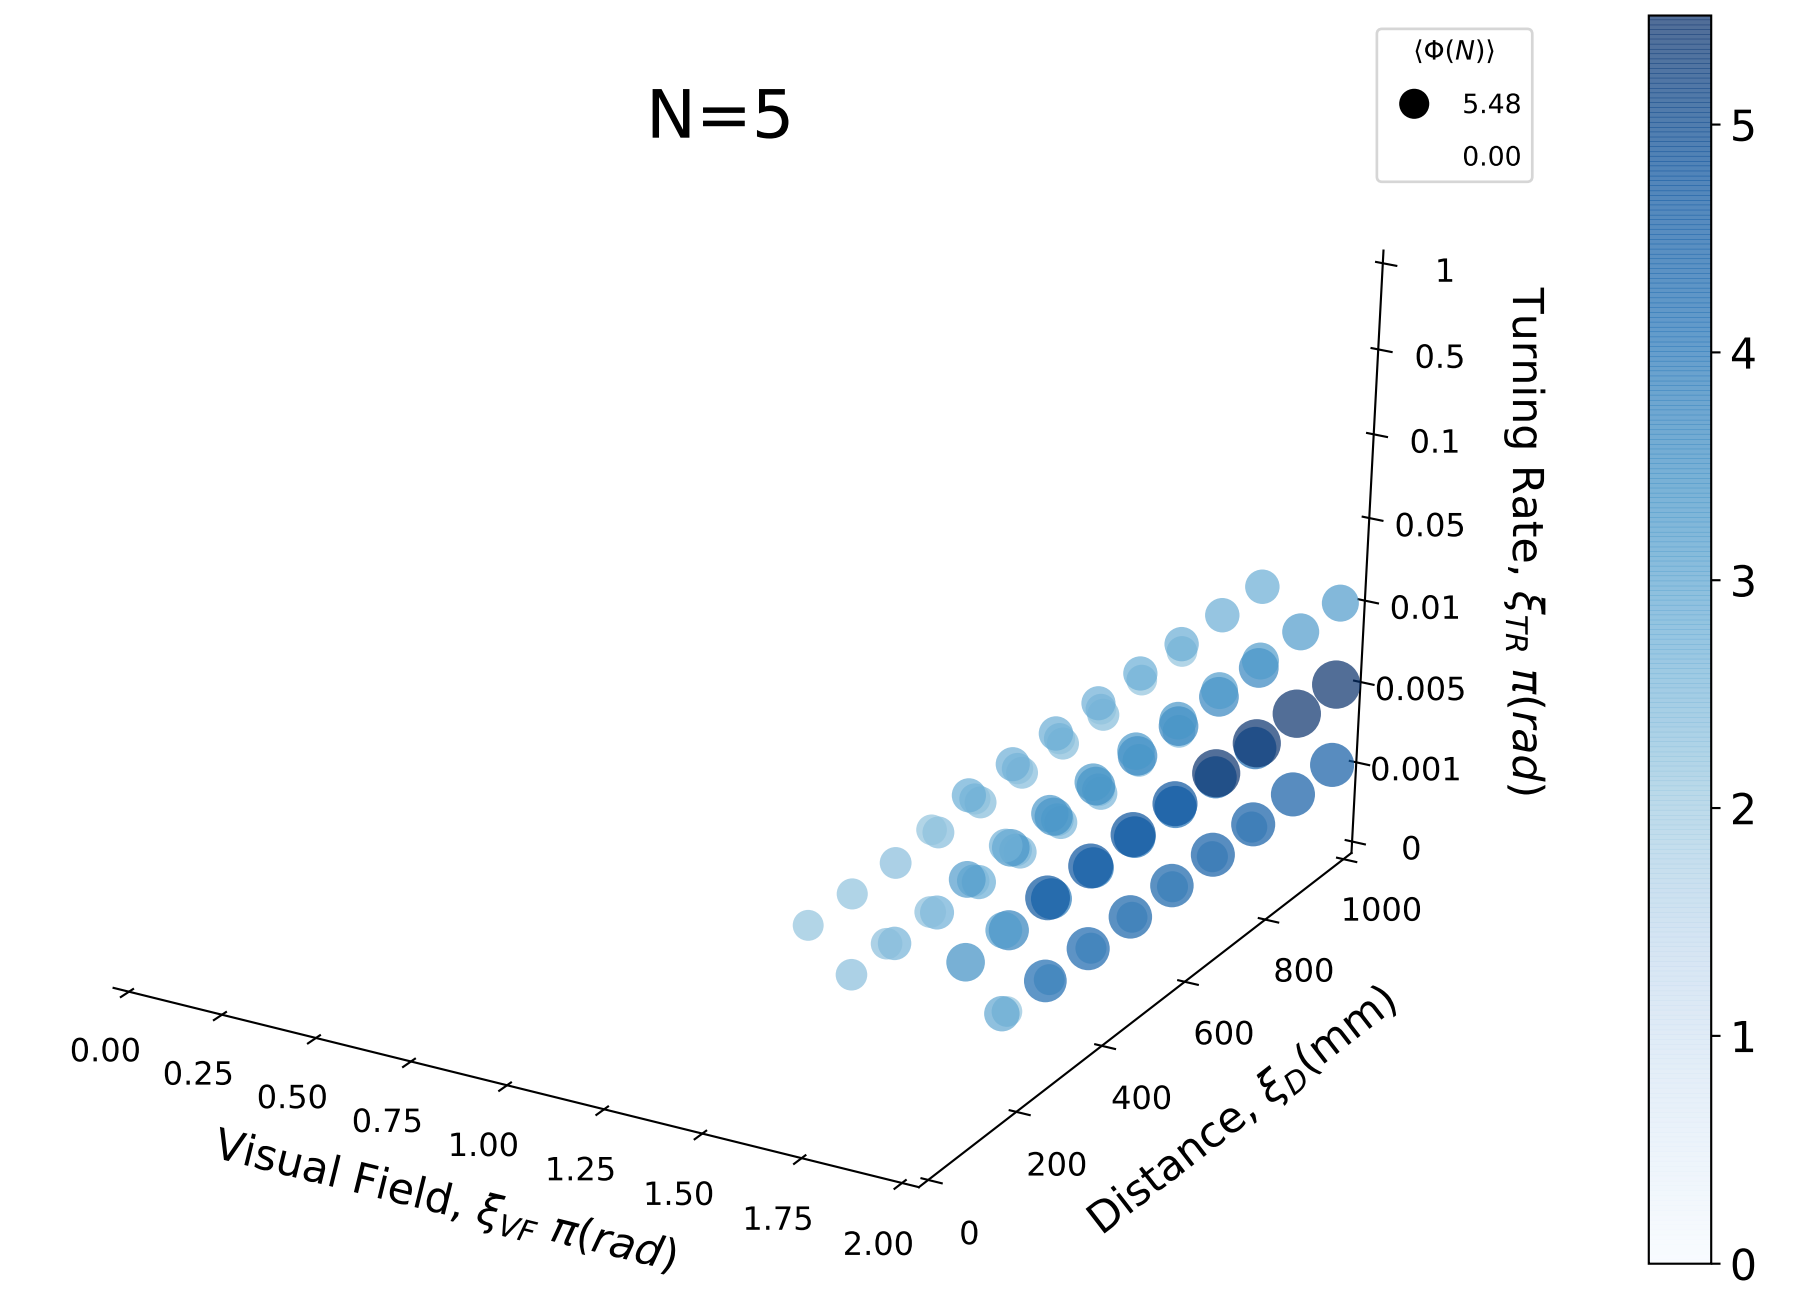

dt = 40/120 sec

N=2

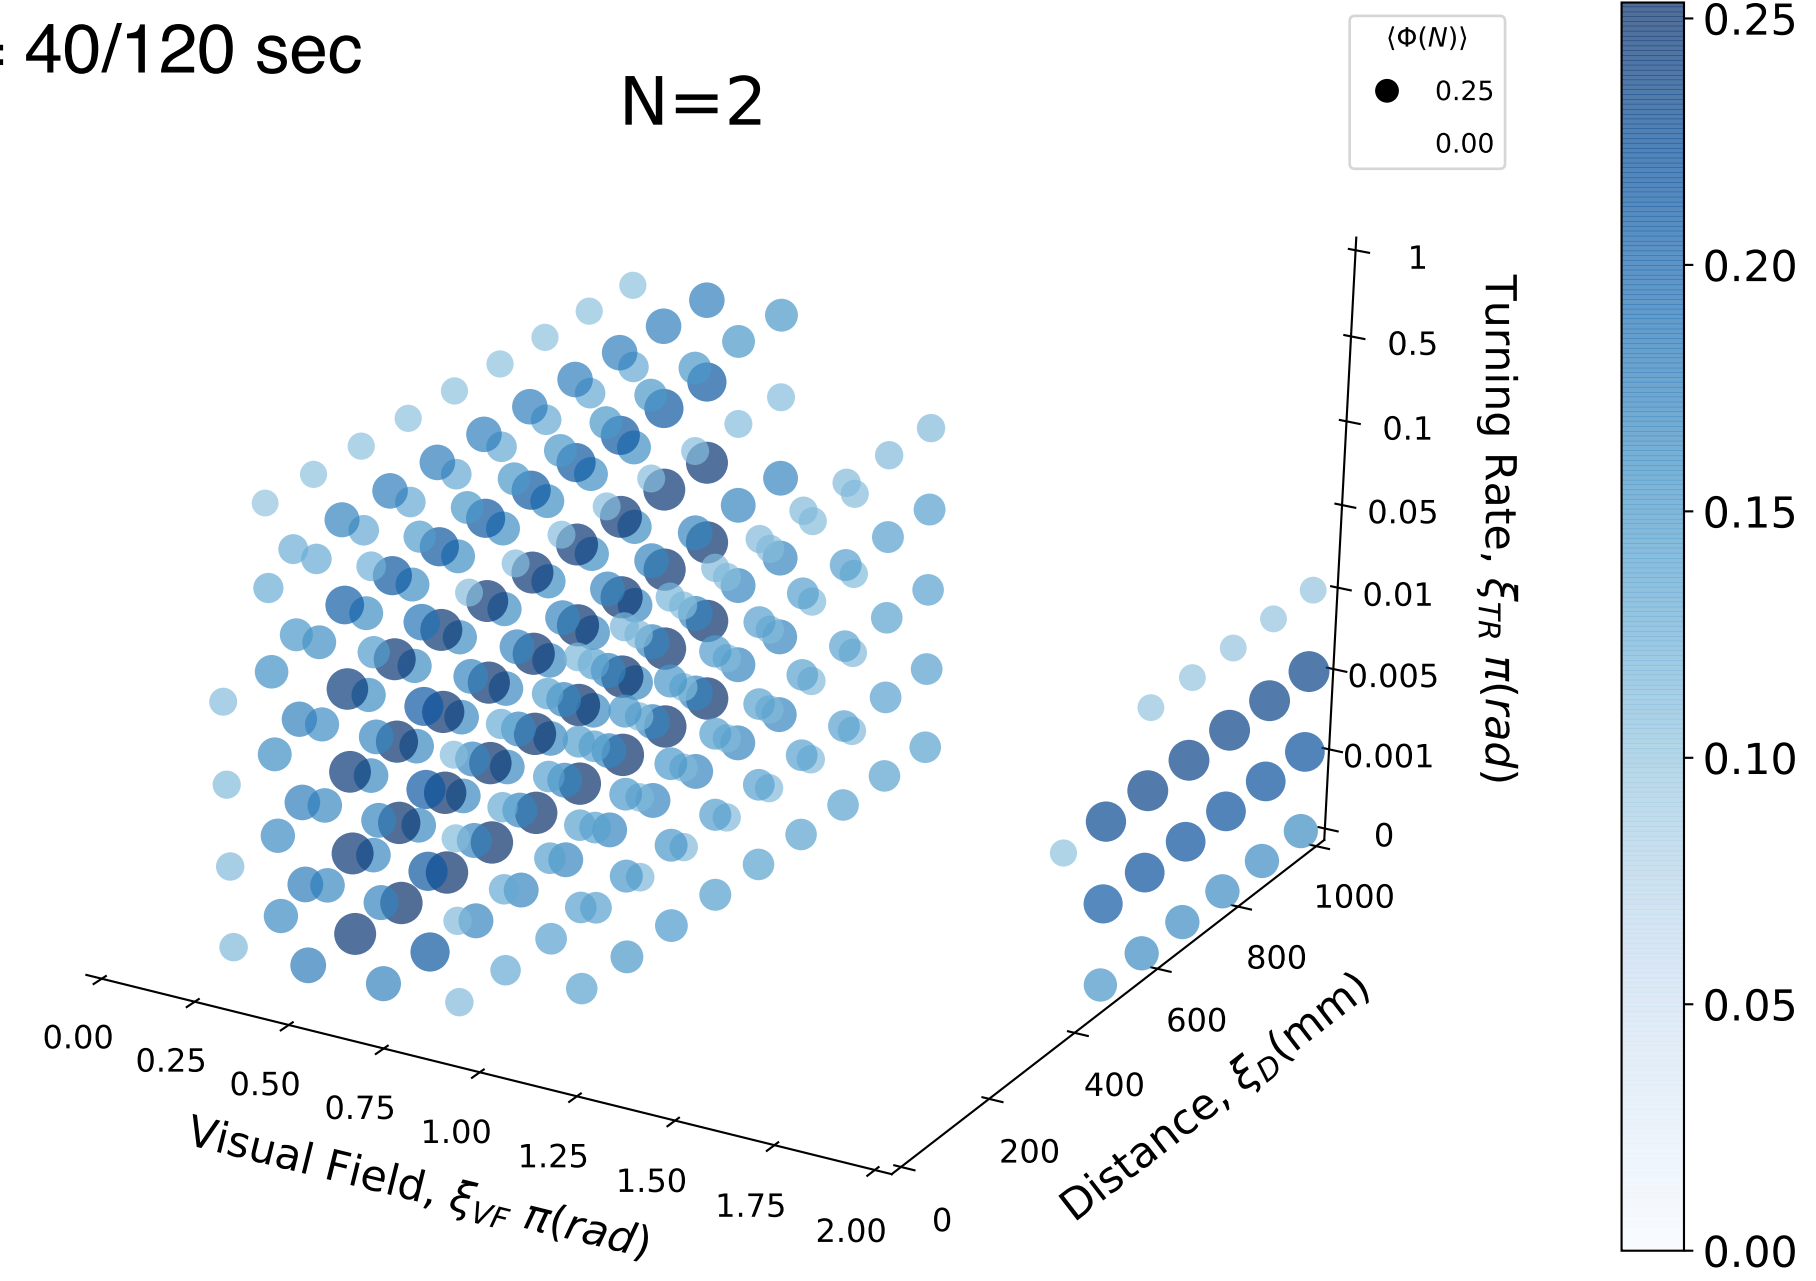

N=3

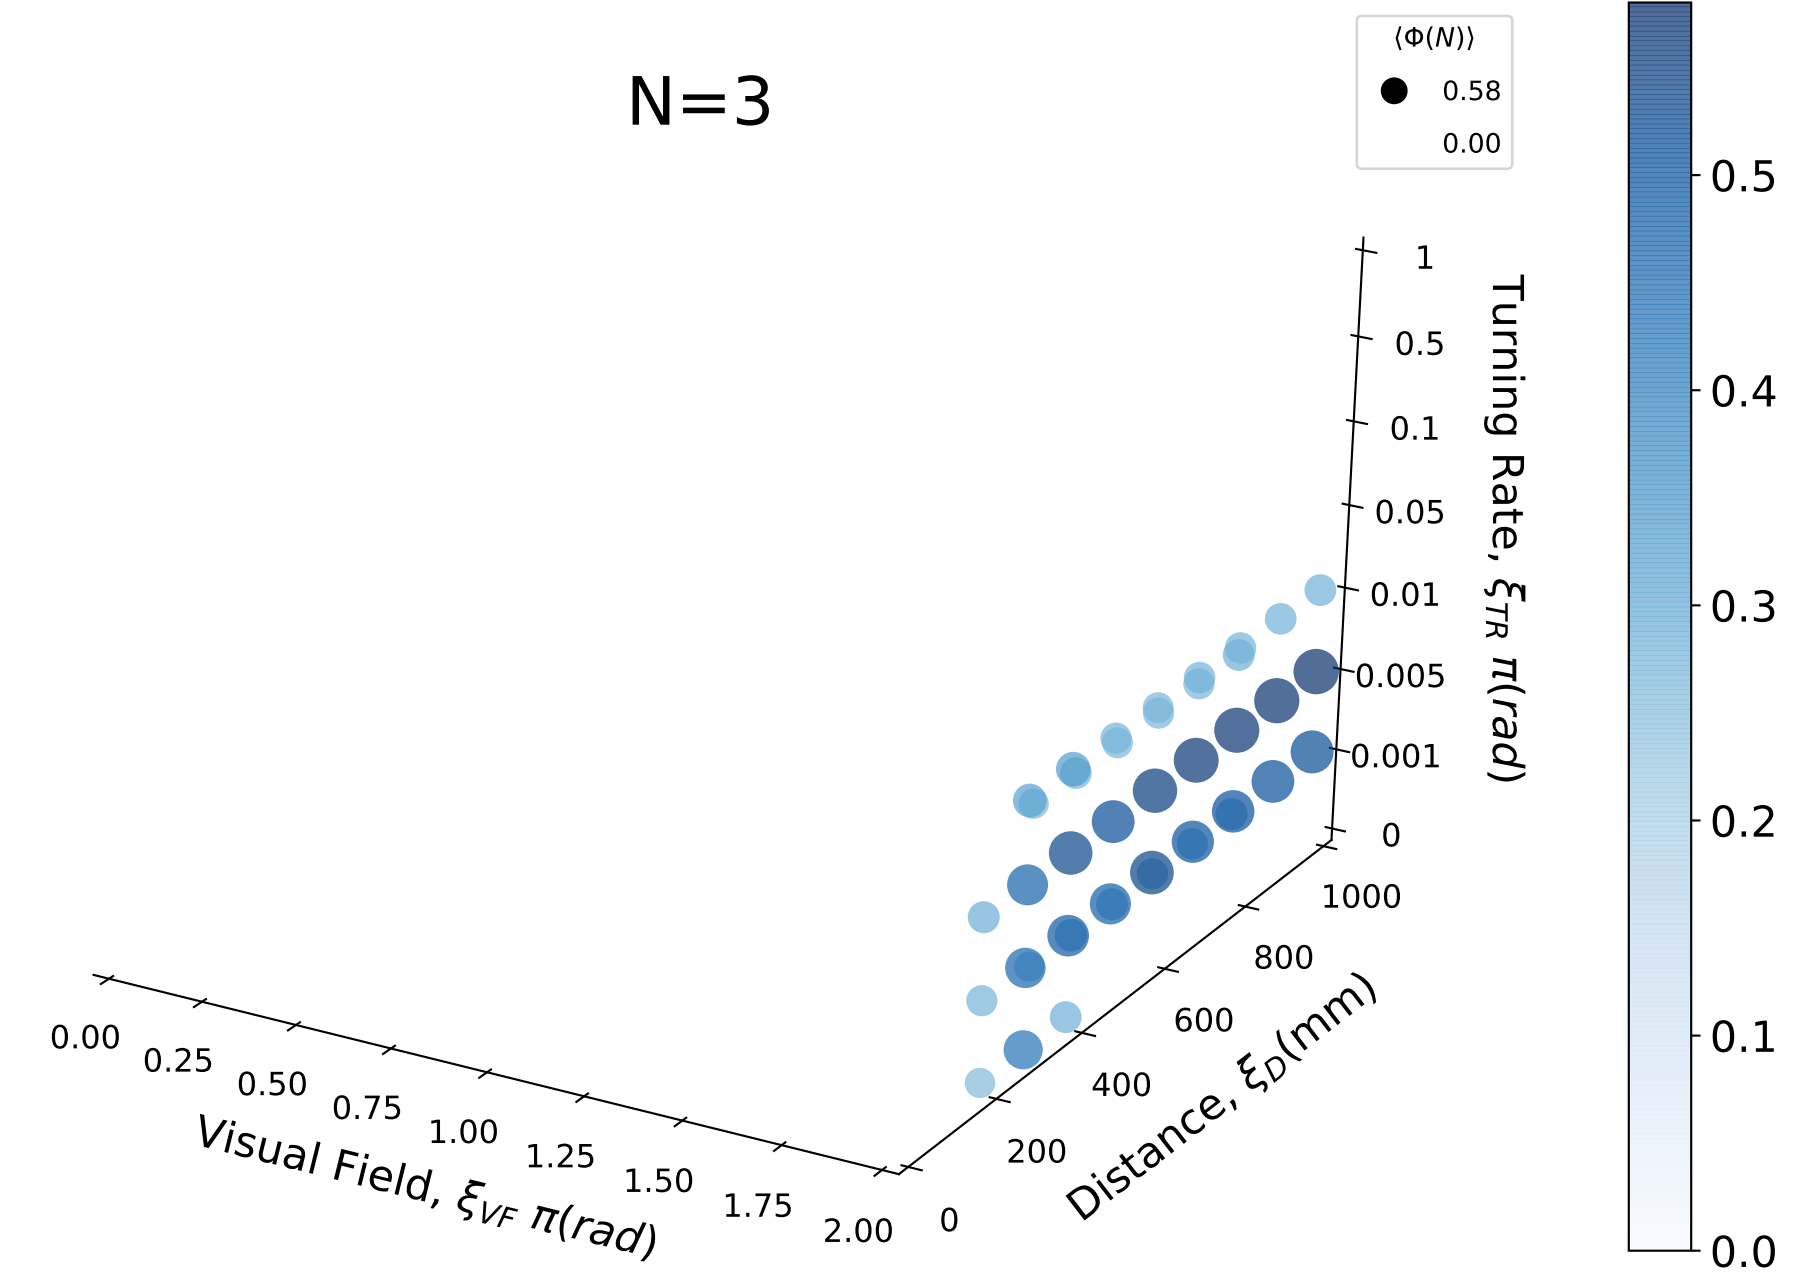

N=4

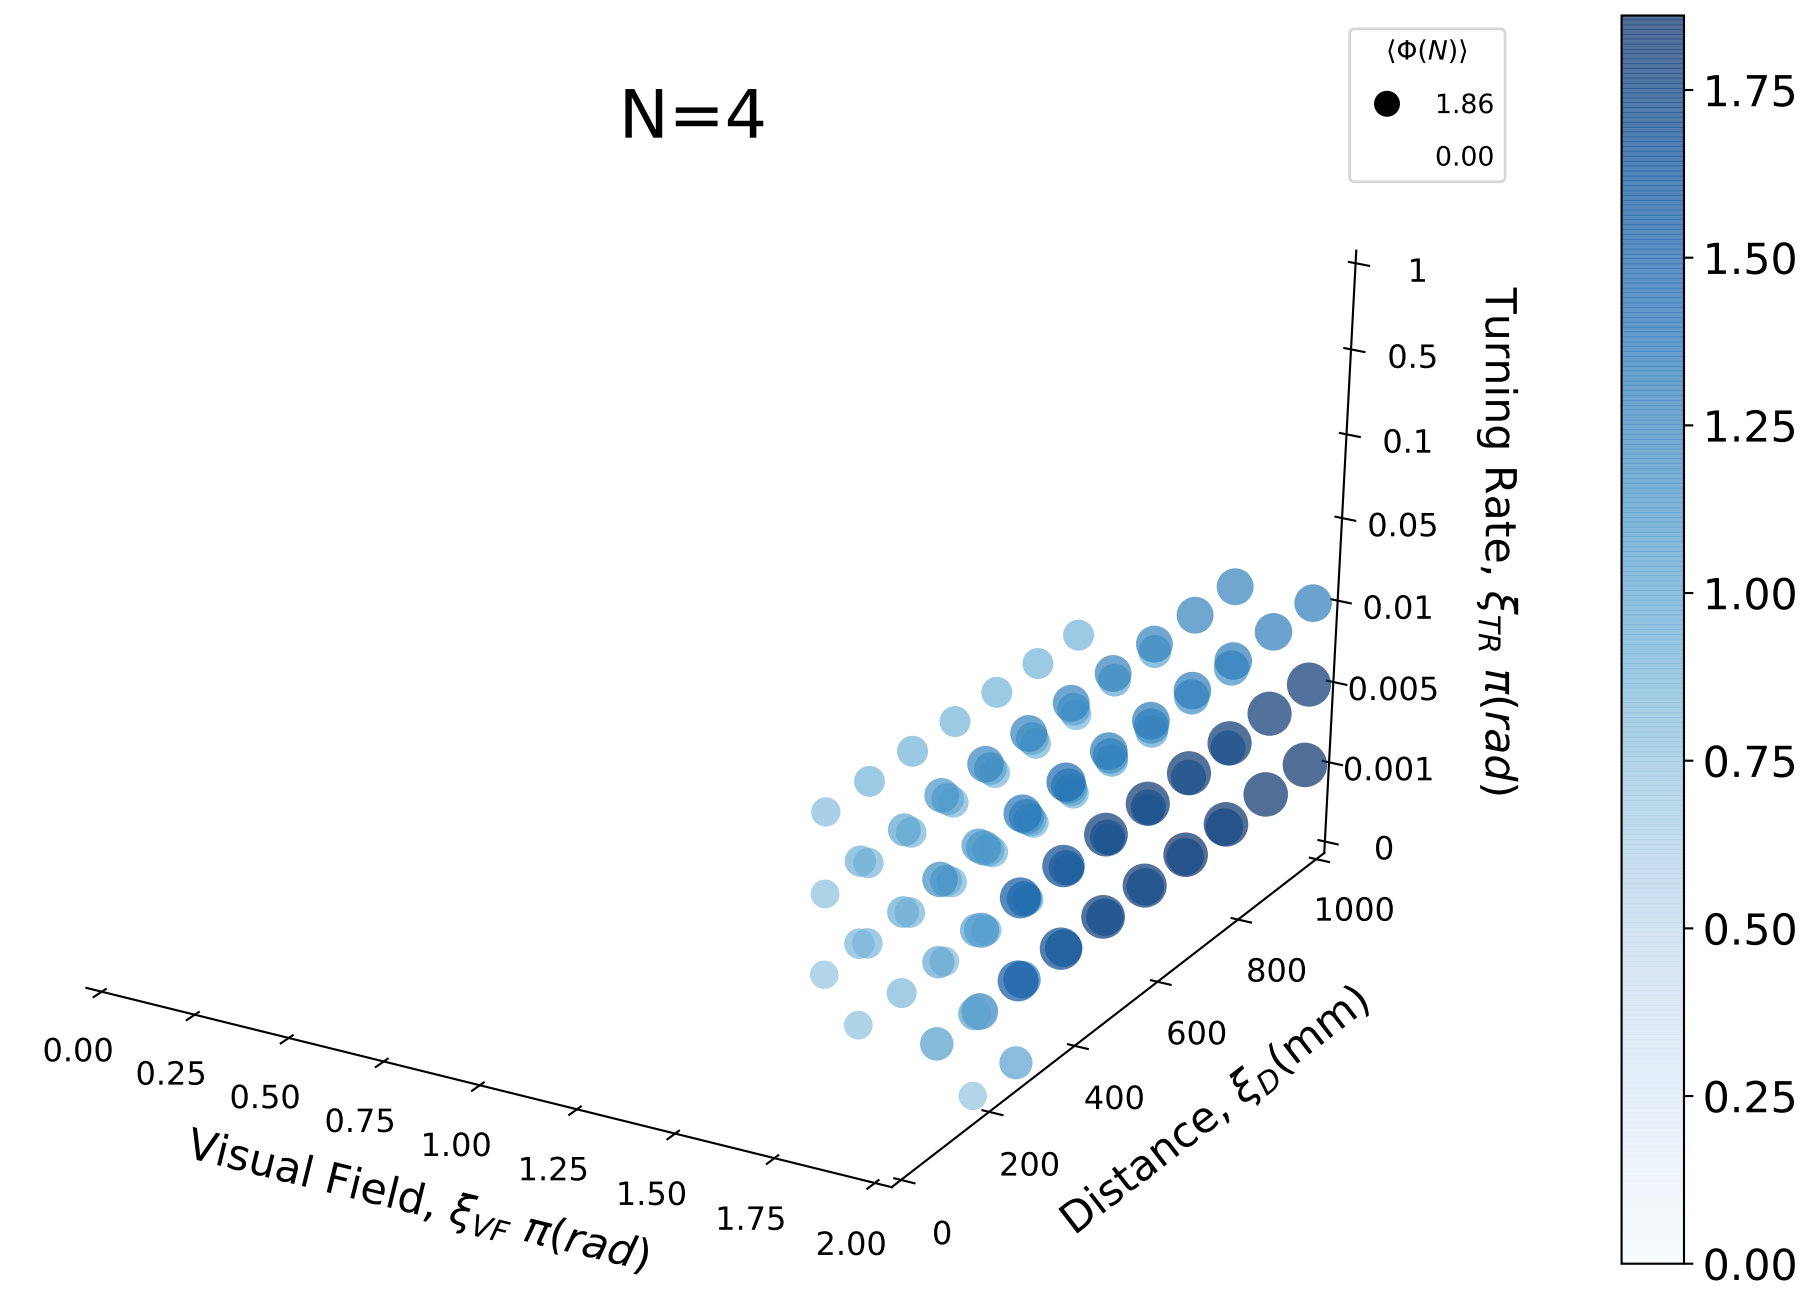

N=5

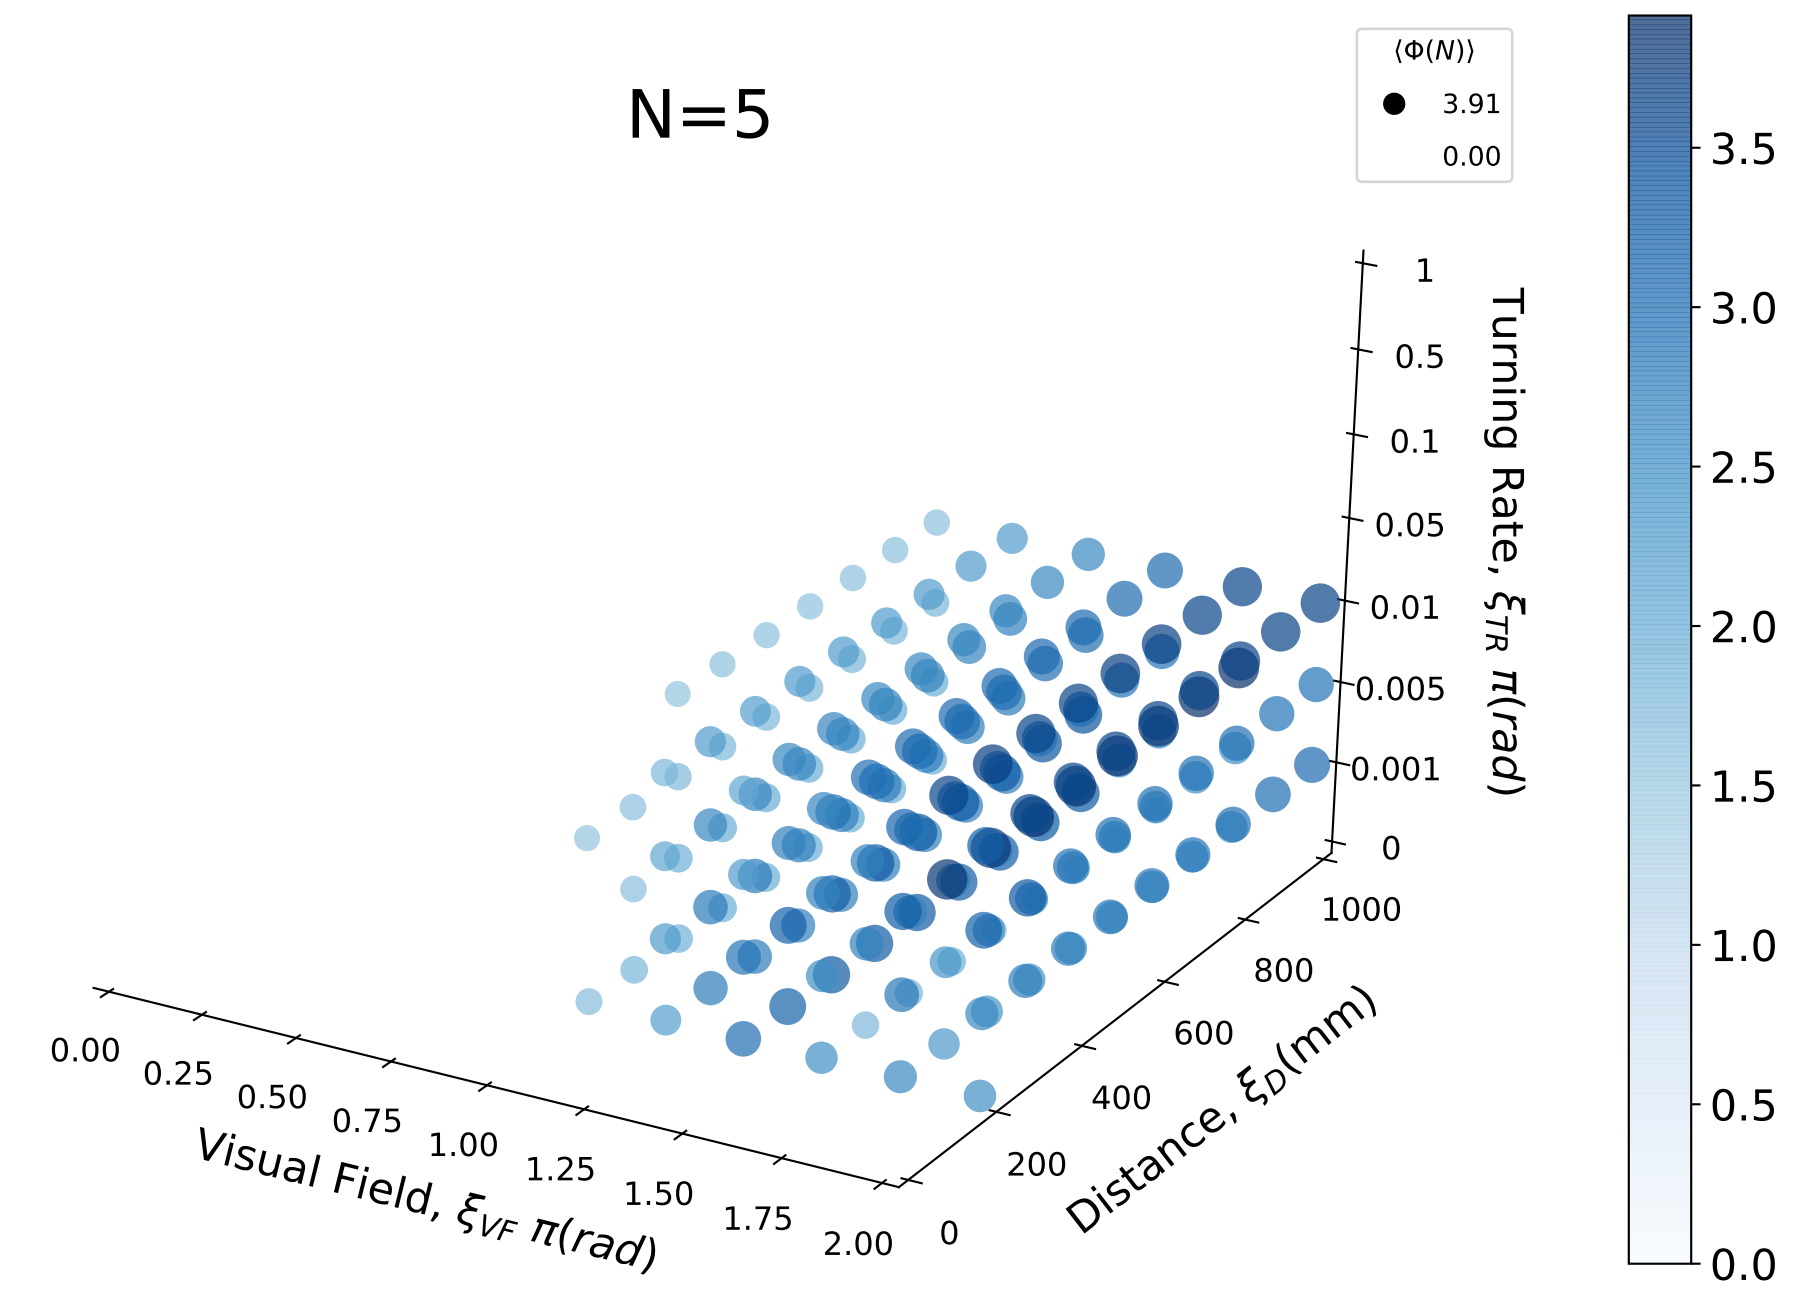

dt = 80/120 sec

N=2

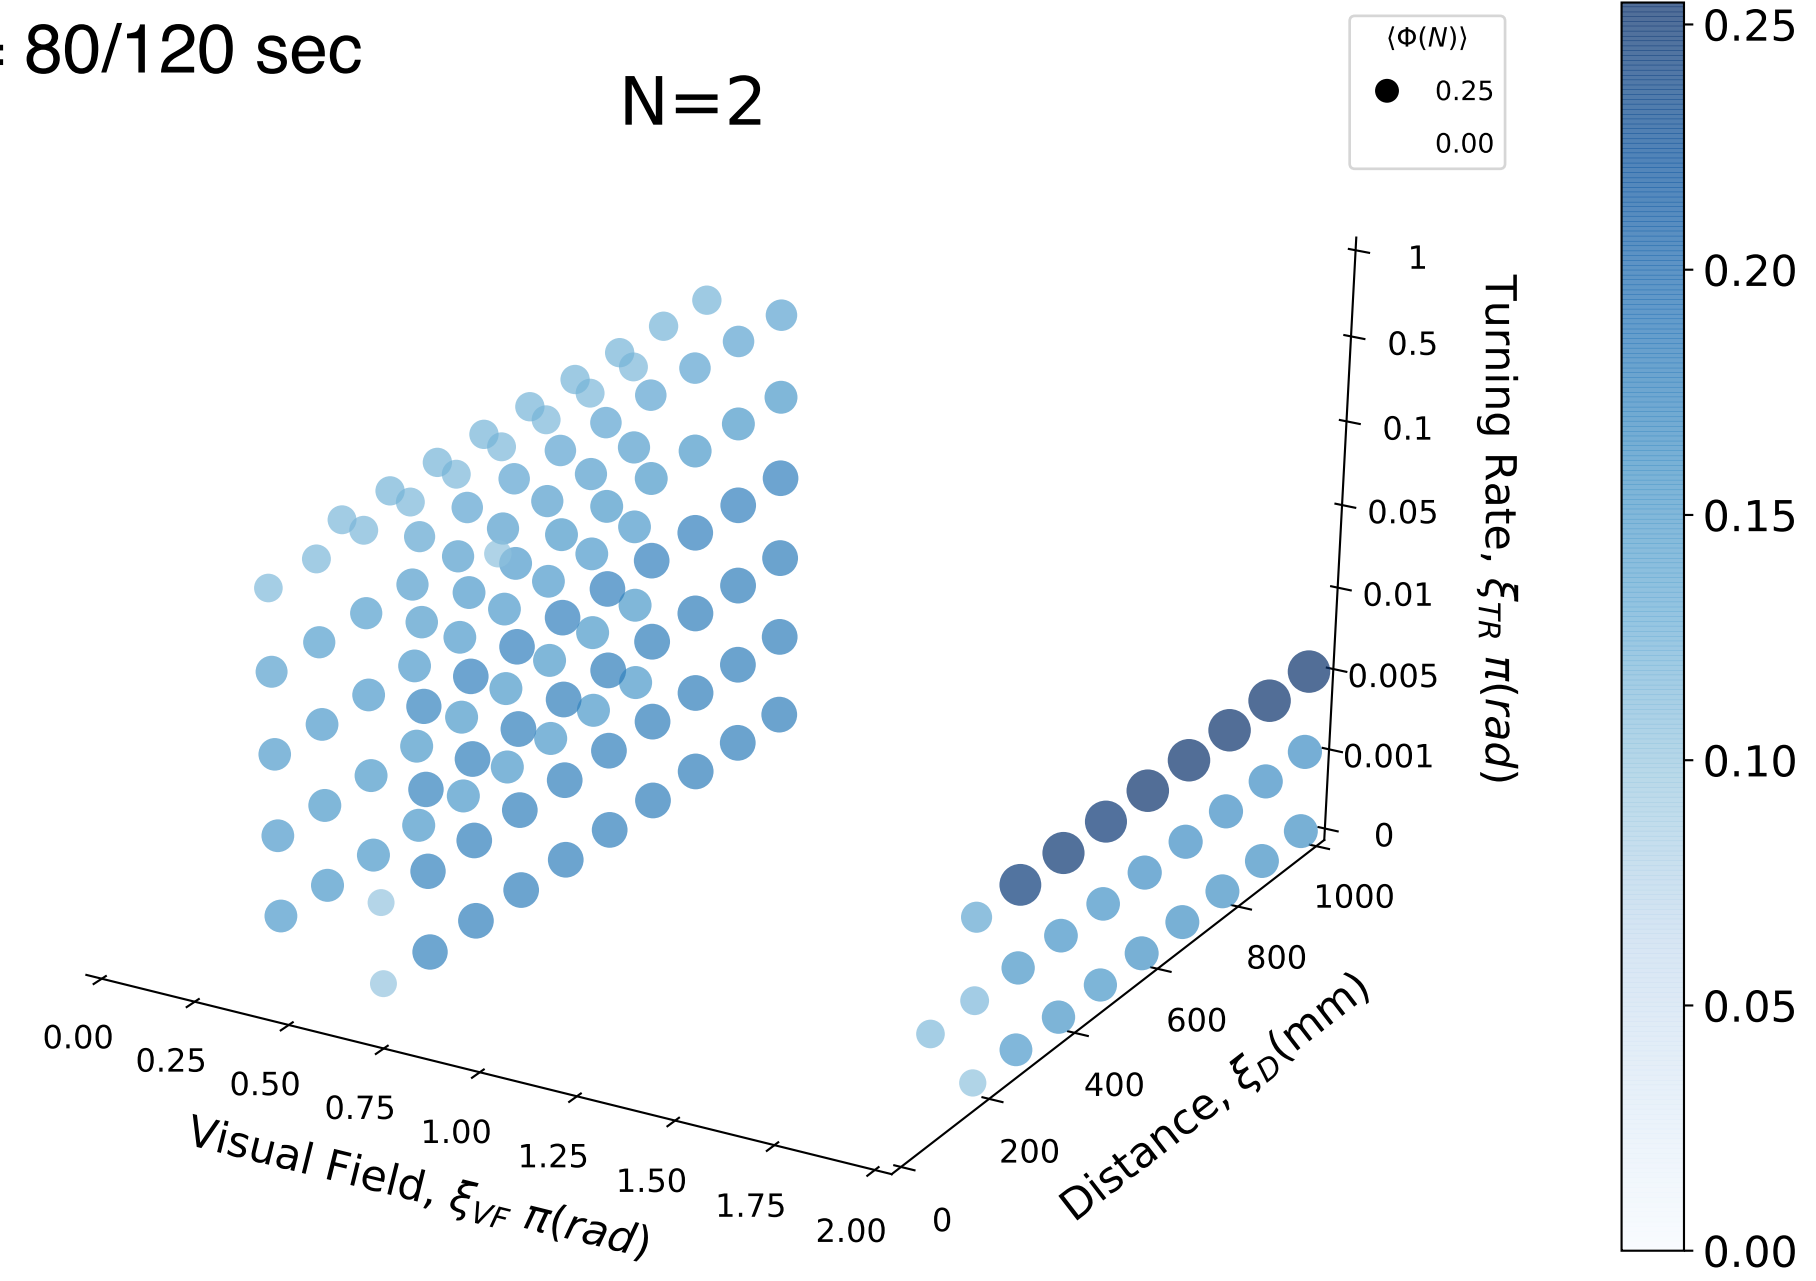

N=3

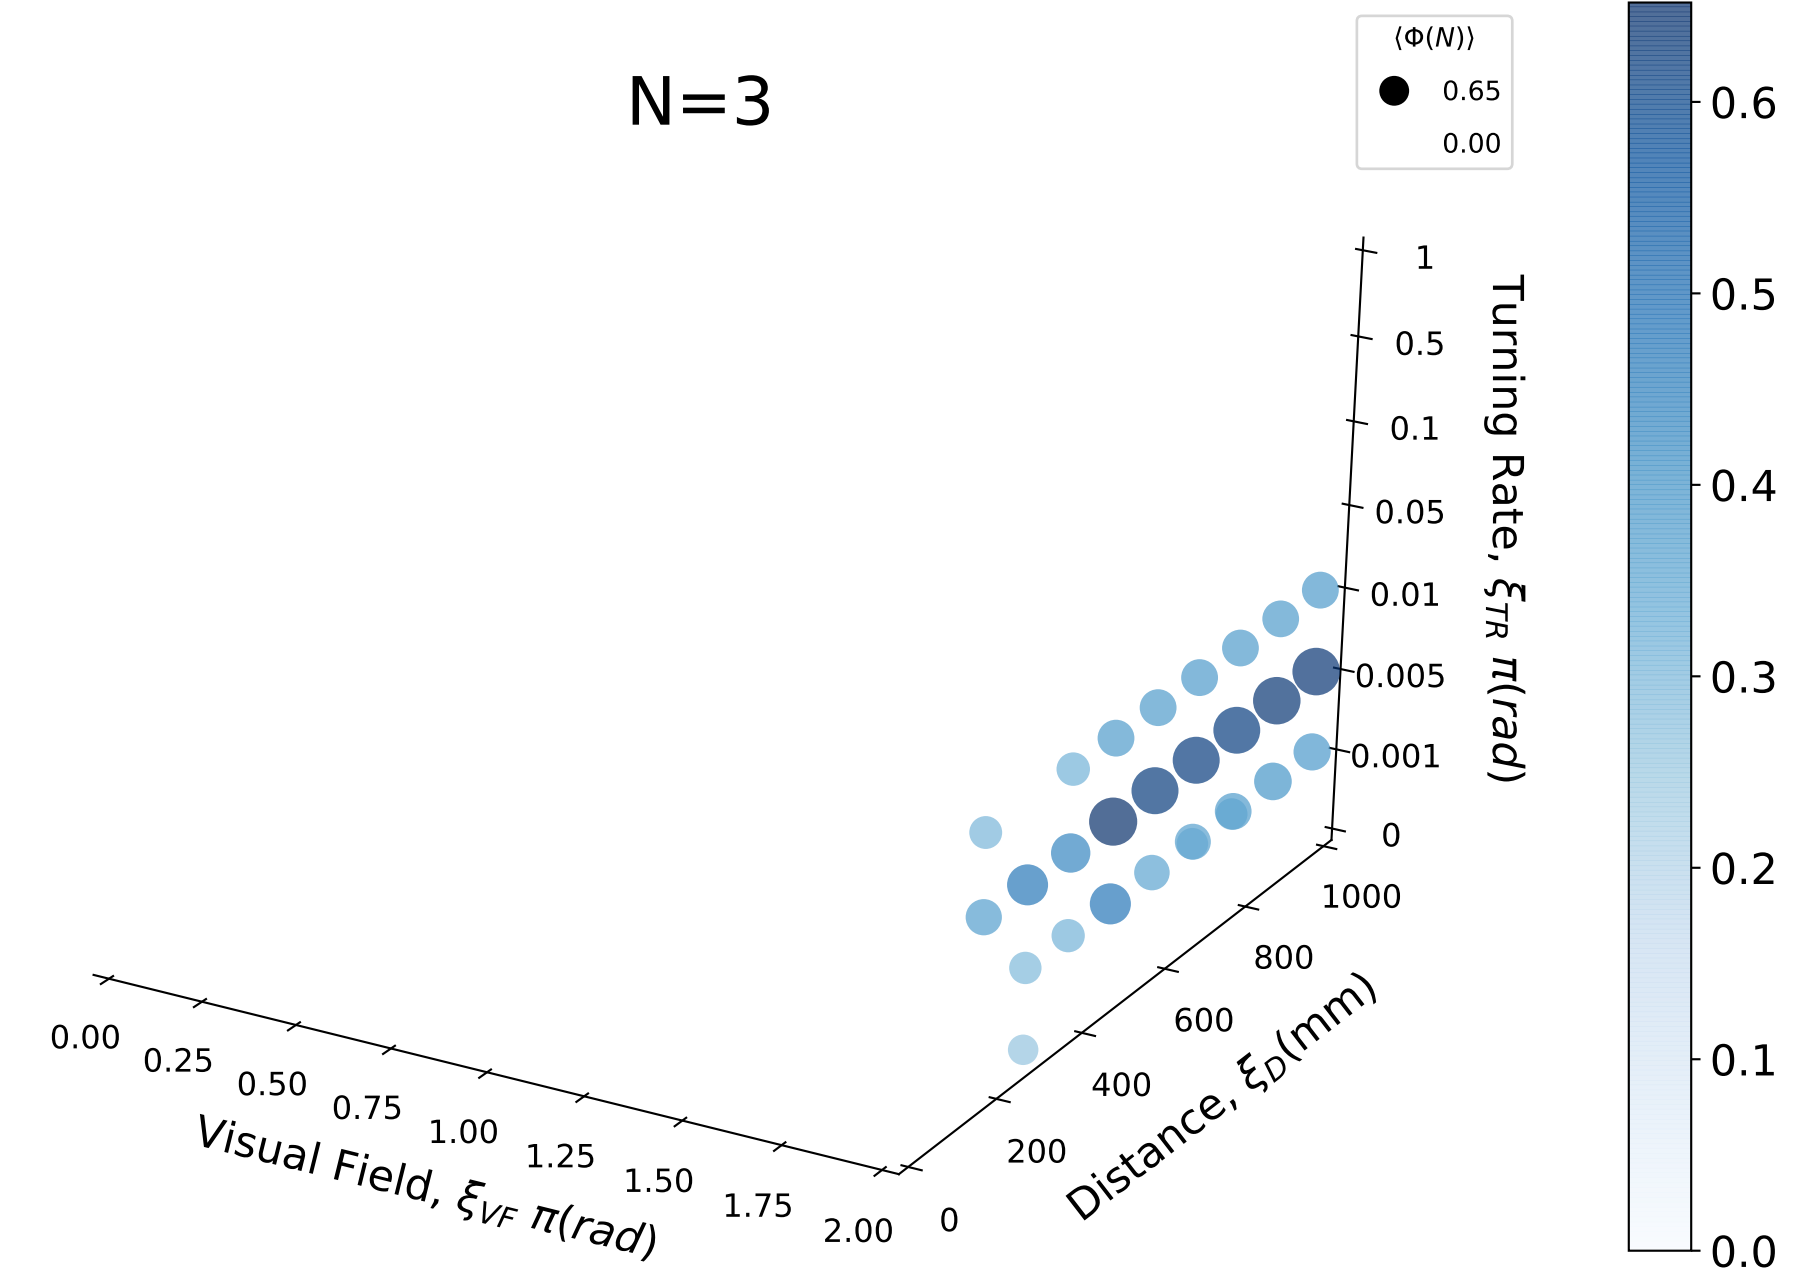

N=4

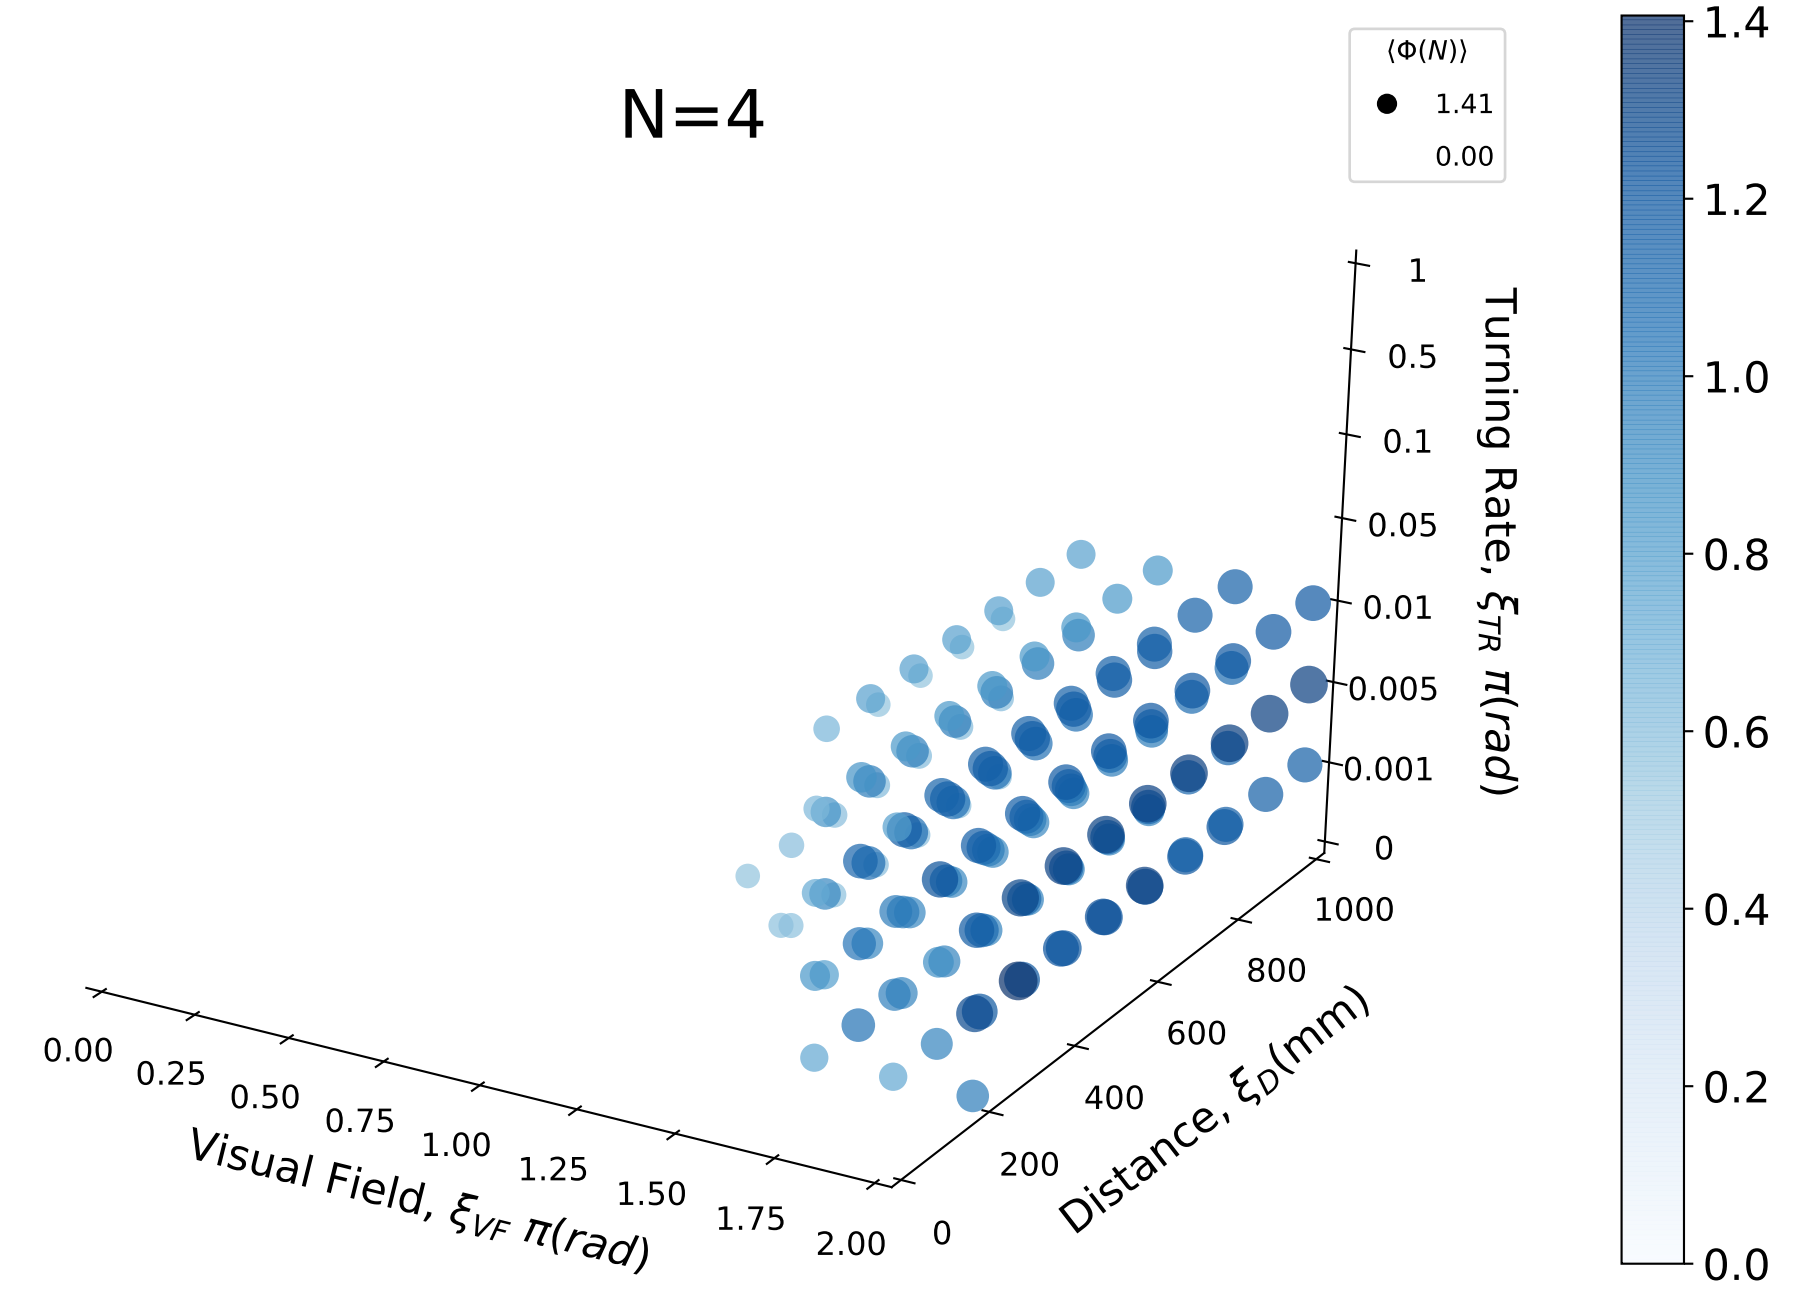

N=5

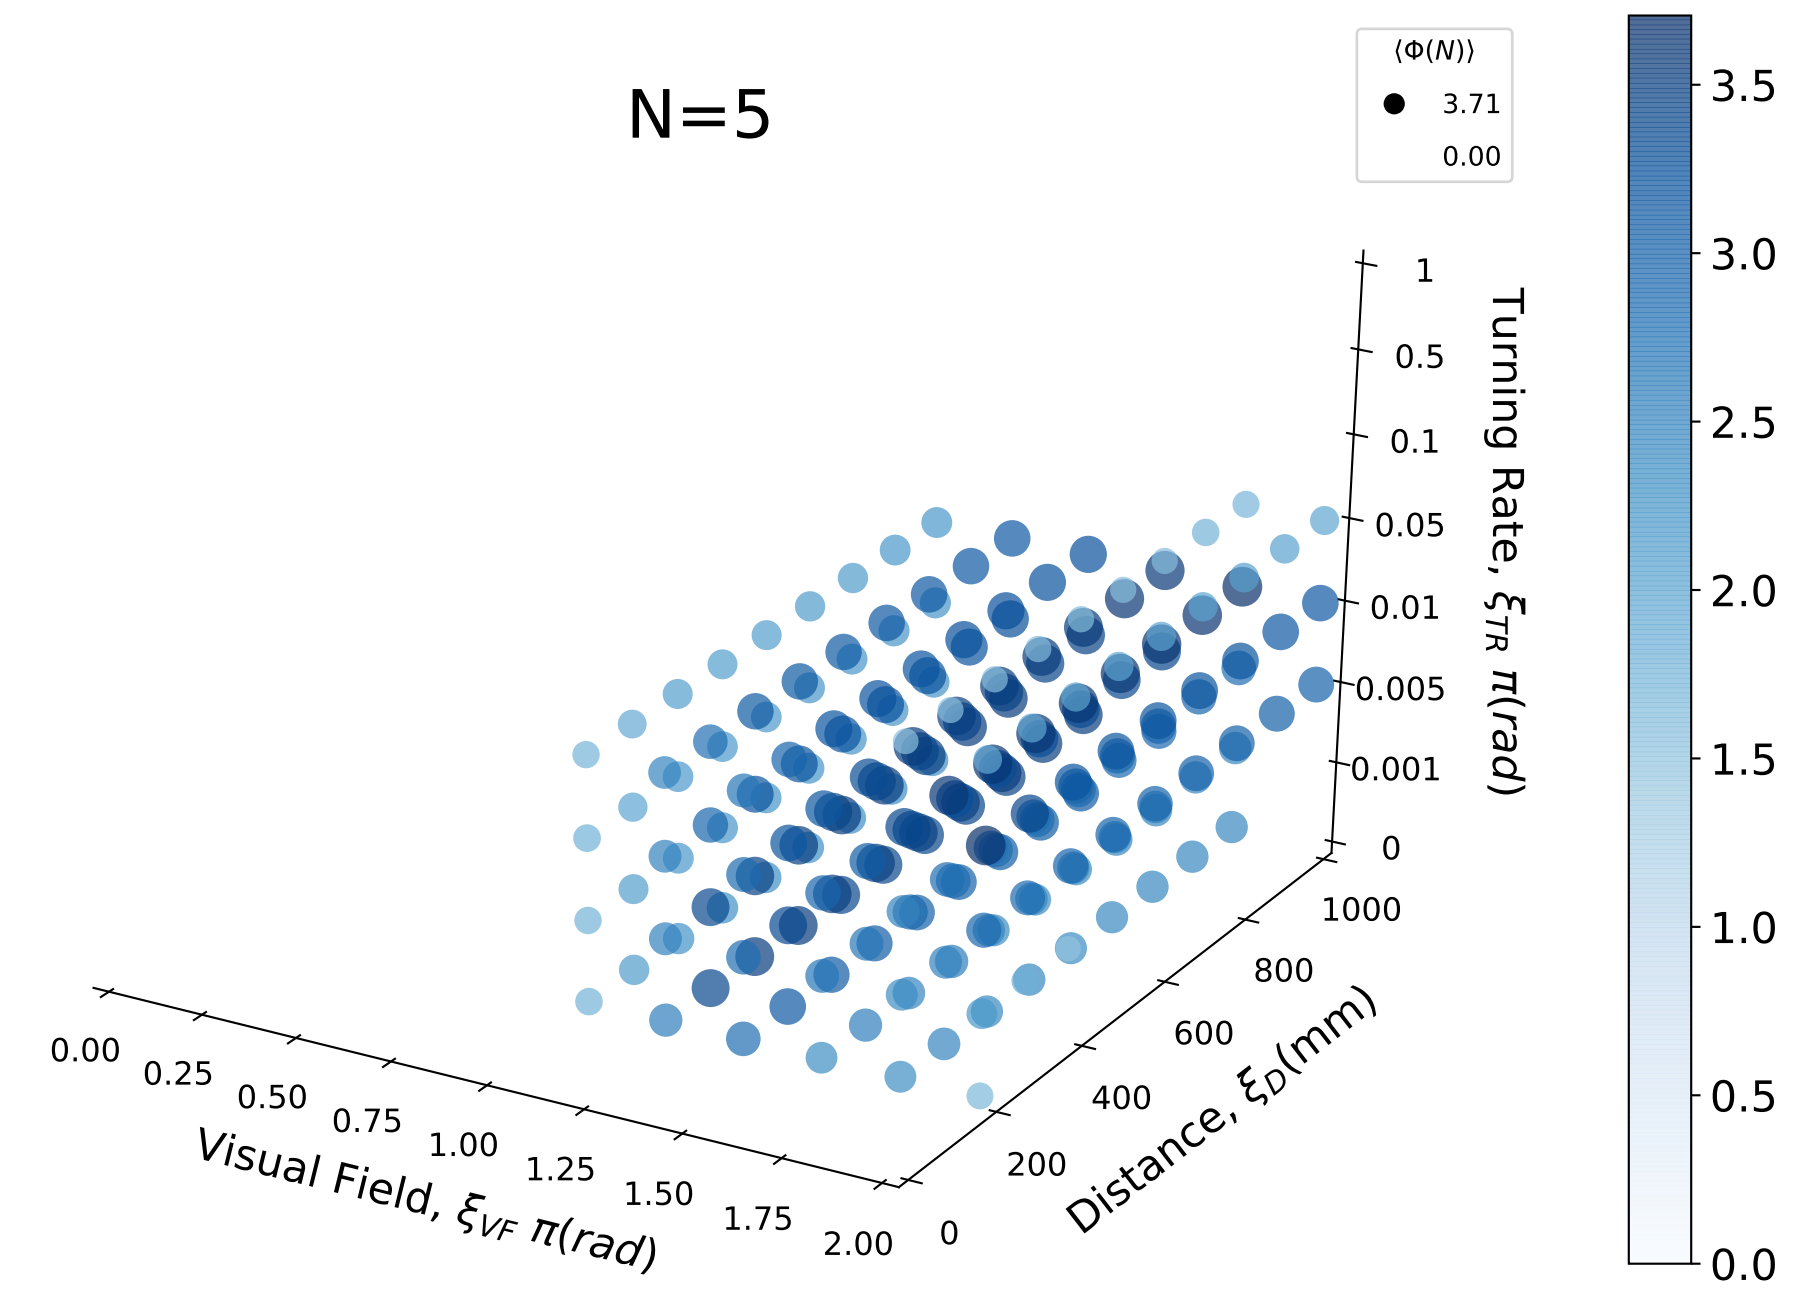



dt = 120/120 sec

N=2

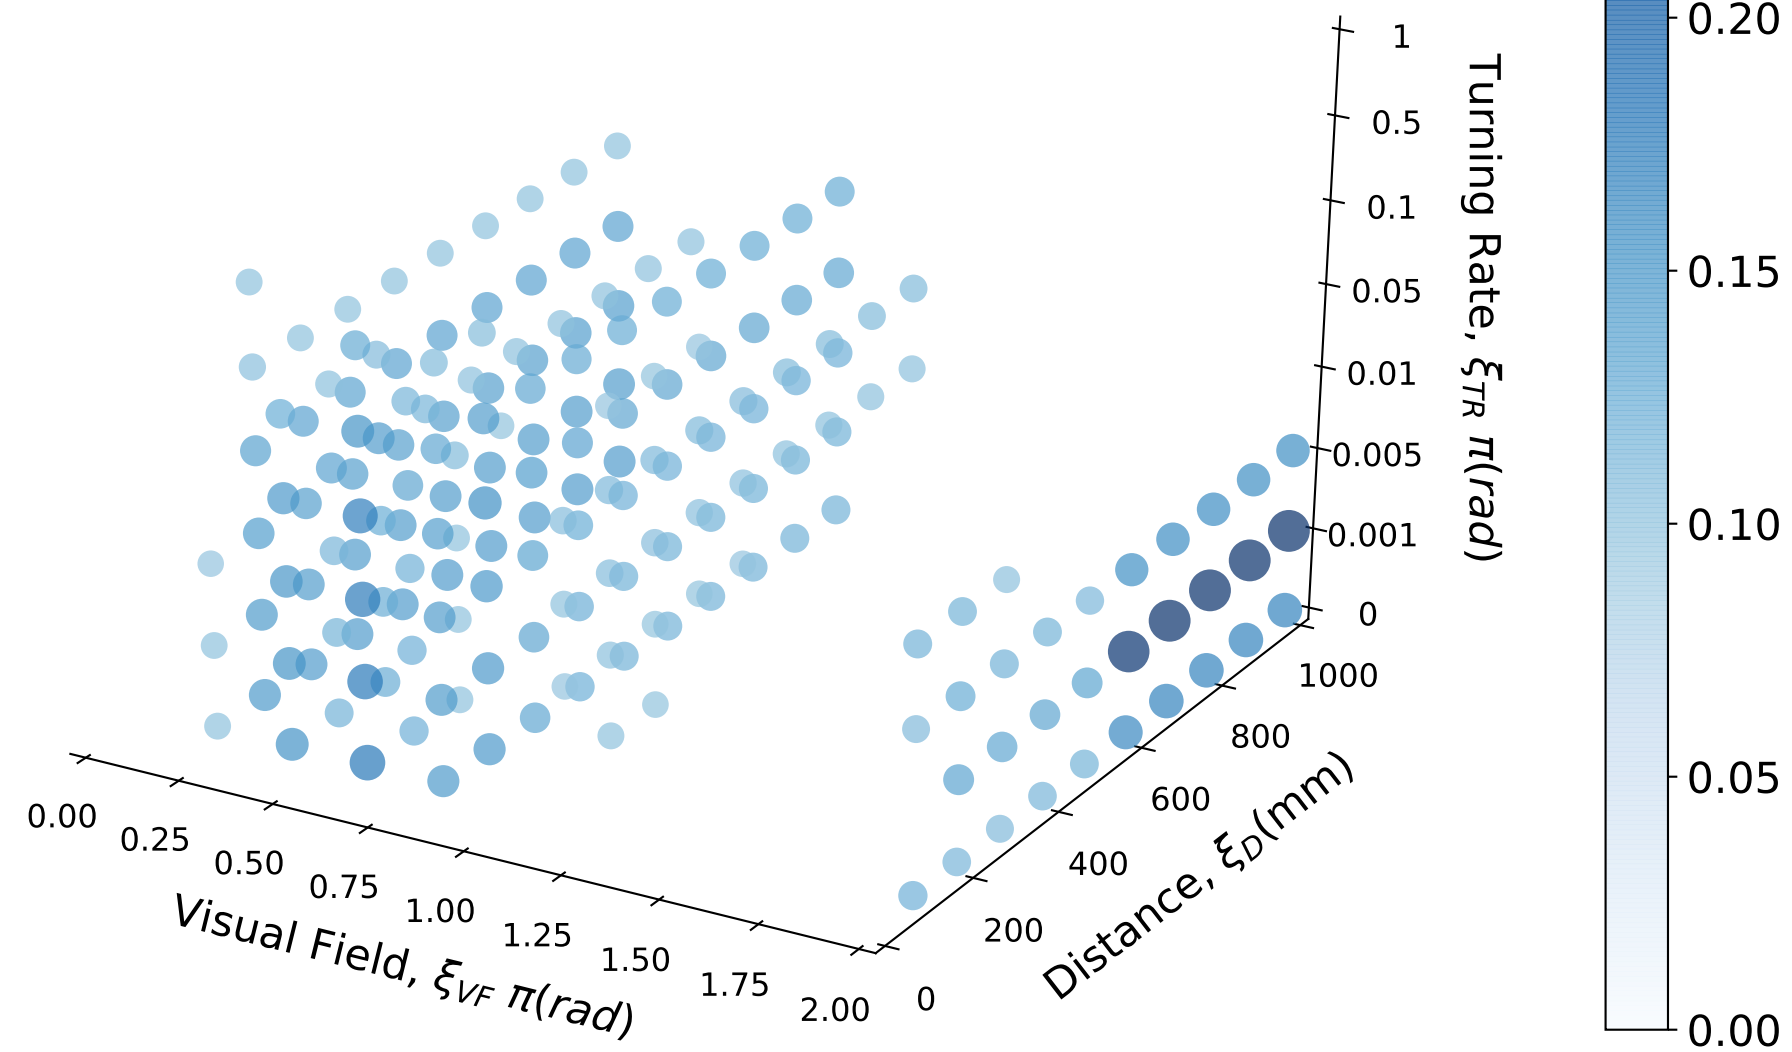

N=3

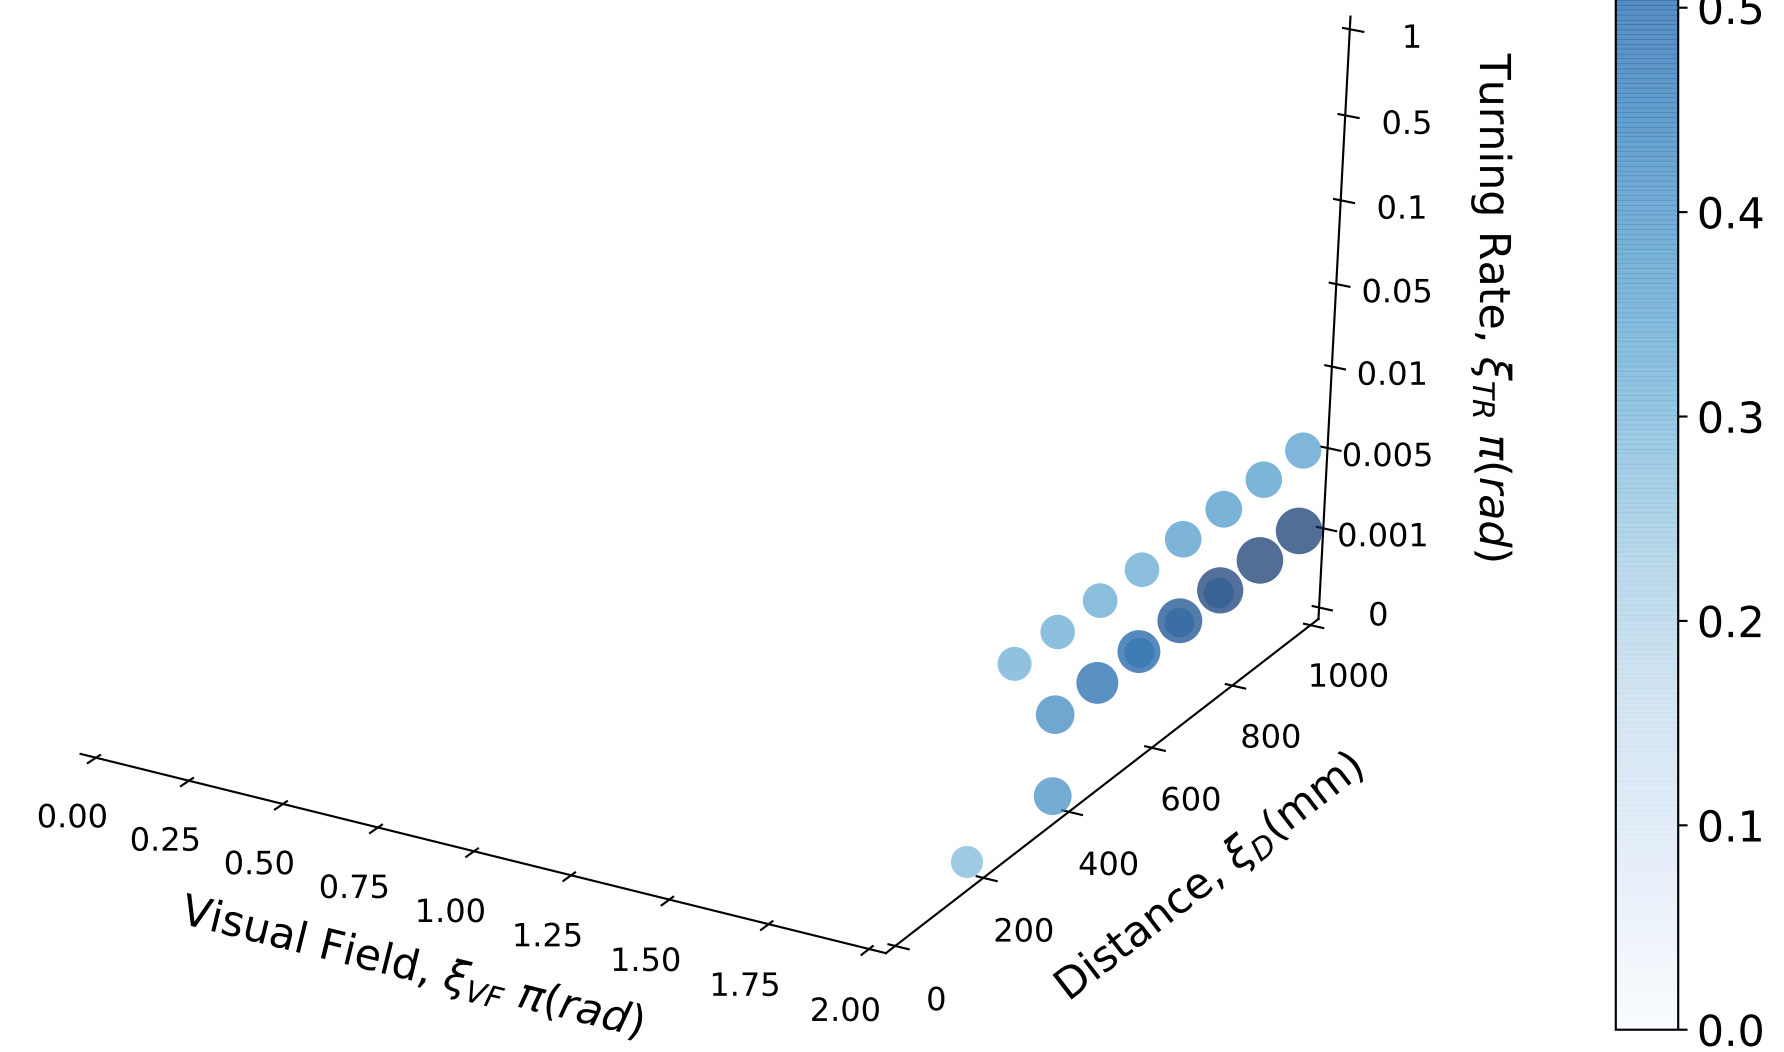

N=4

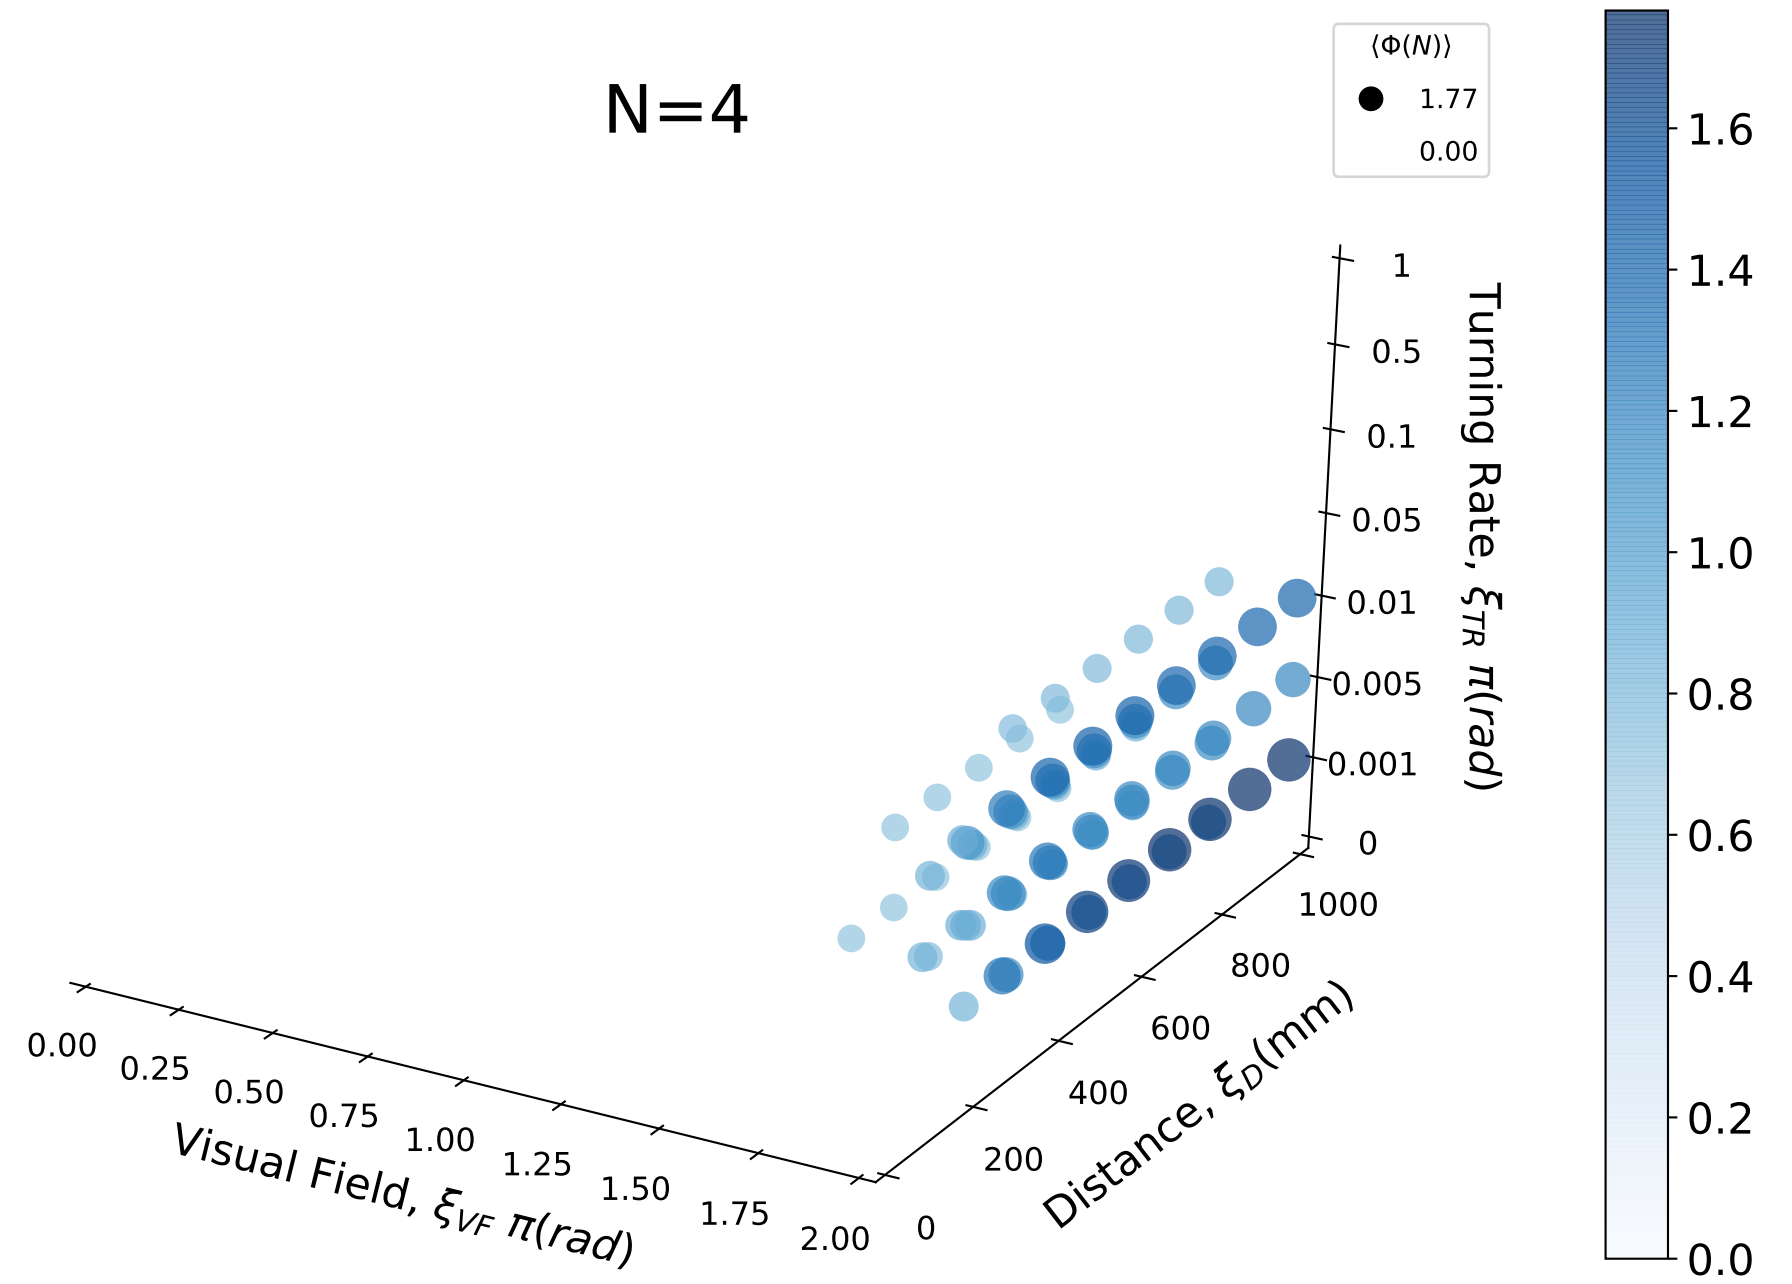

N=5

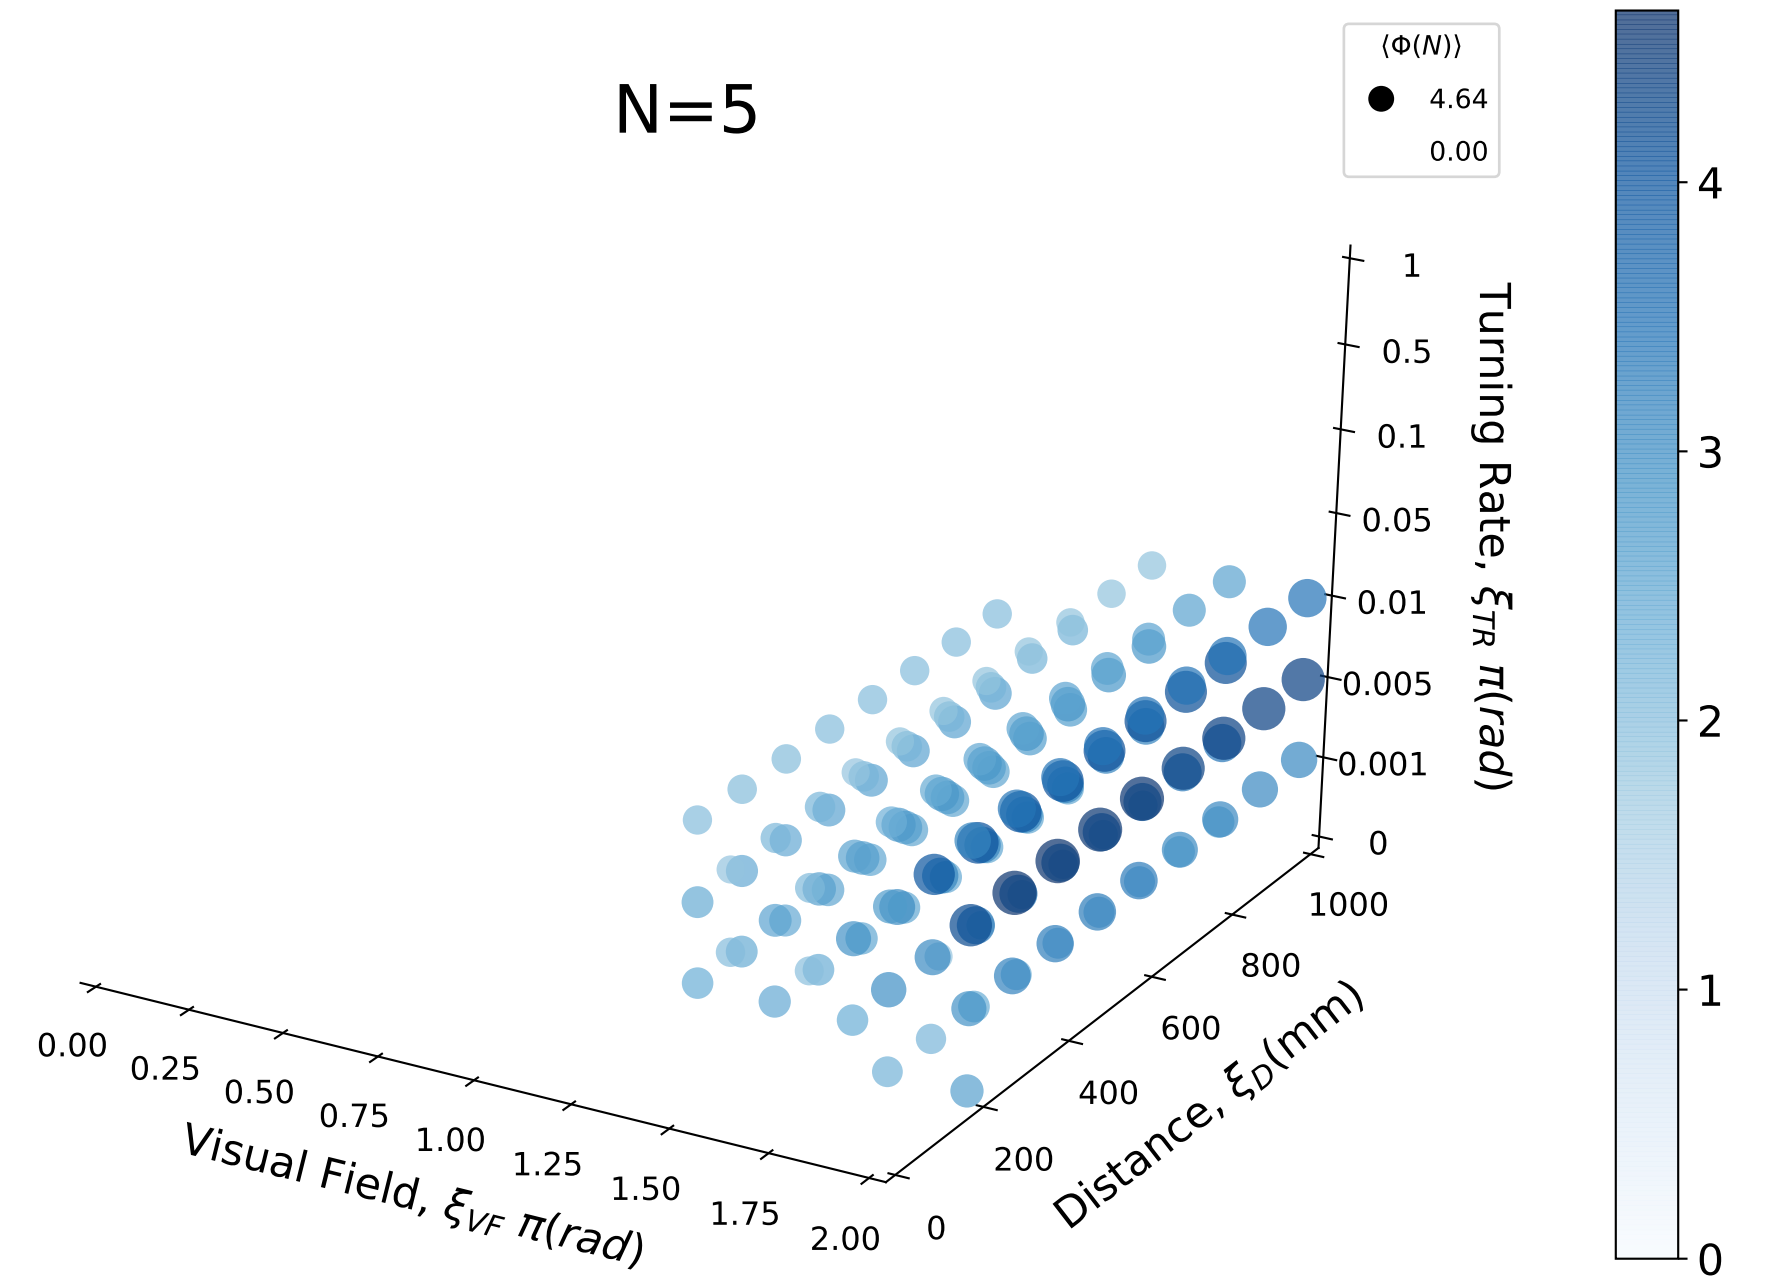

Supplement: s1 [file s1]

dt = 5/120 sec

N=2

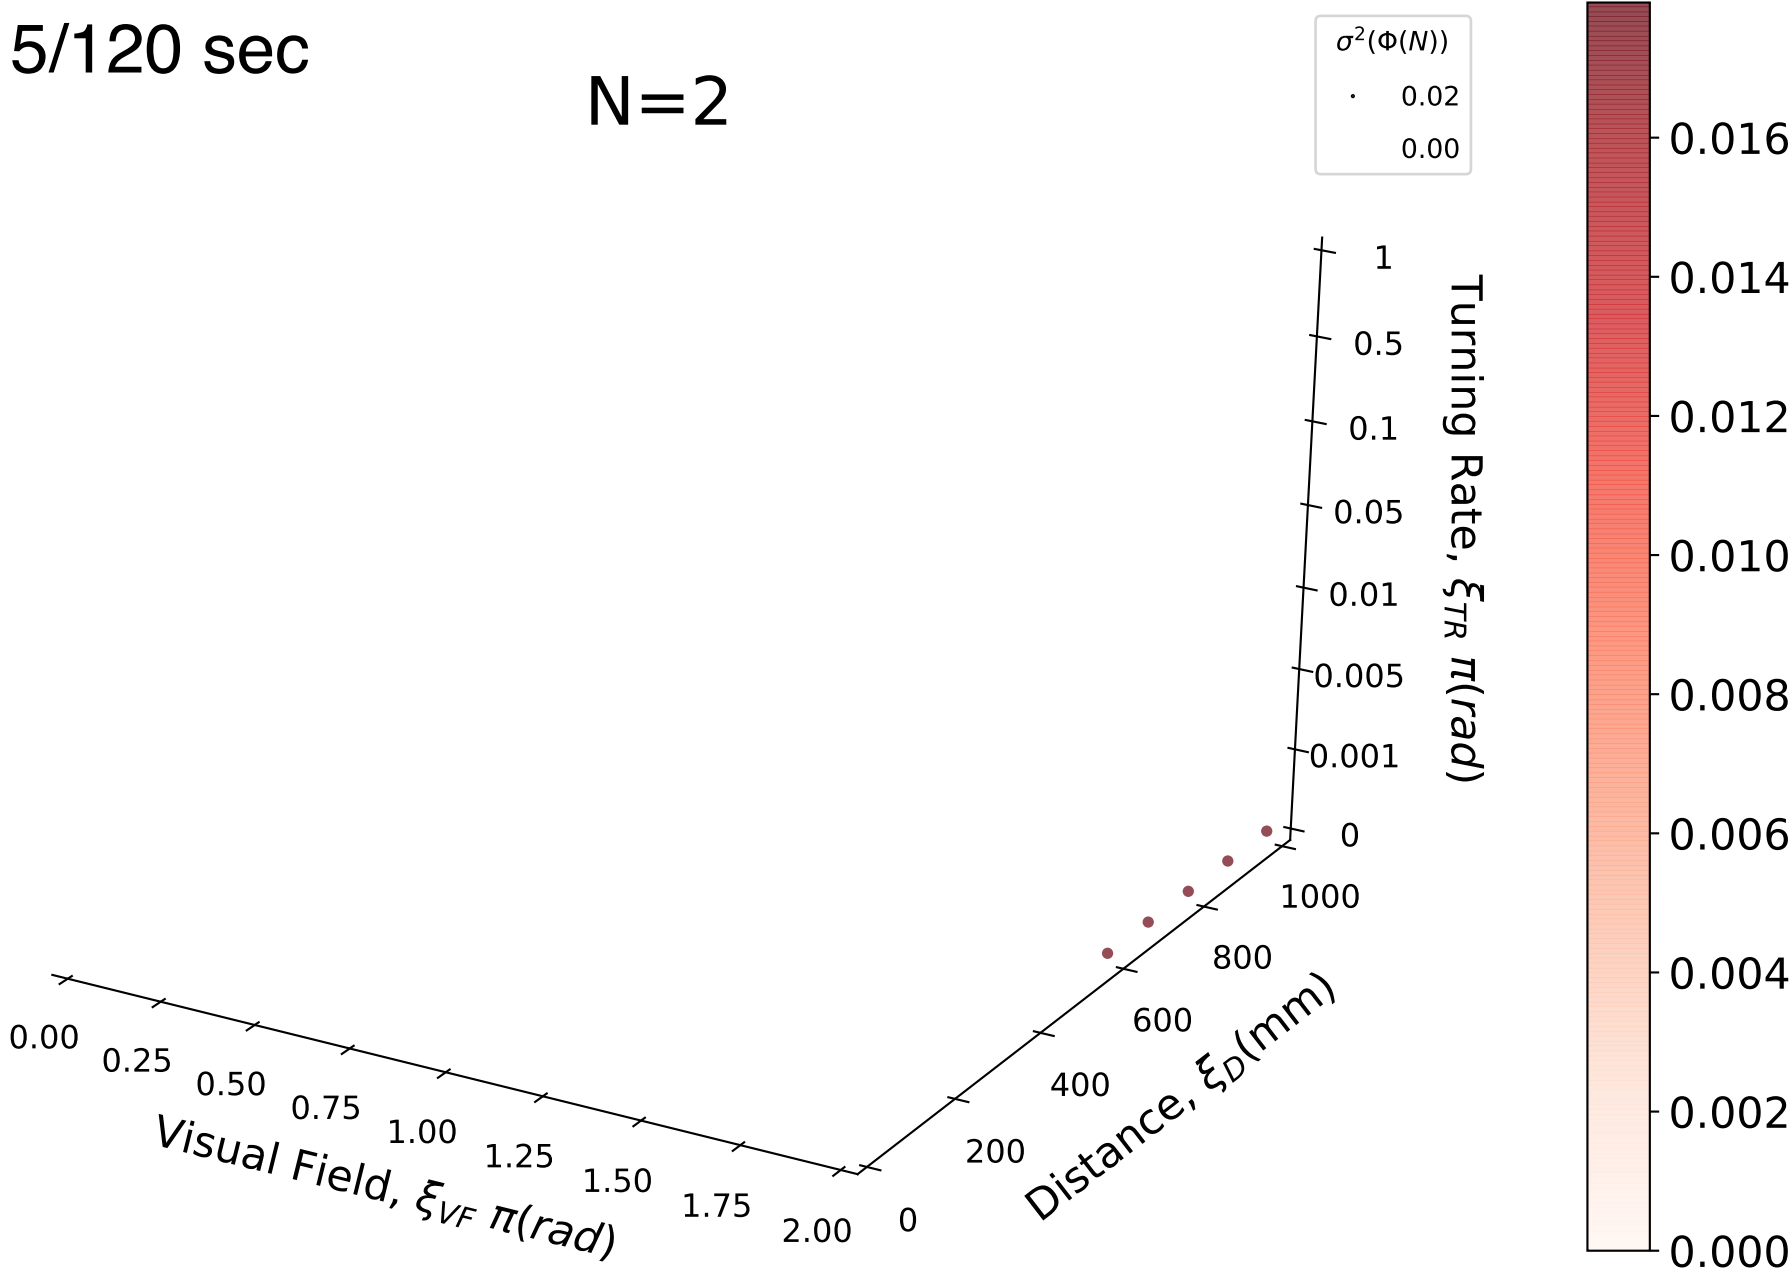

N=3

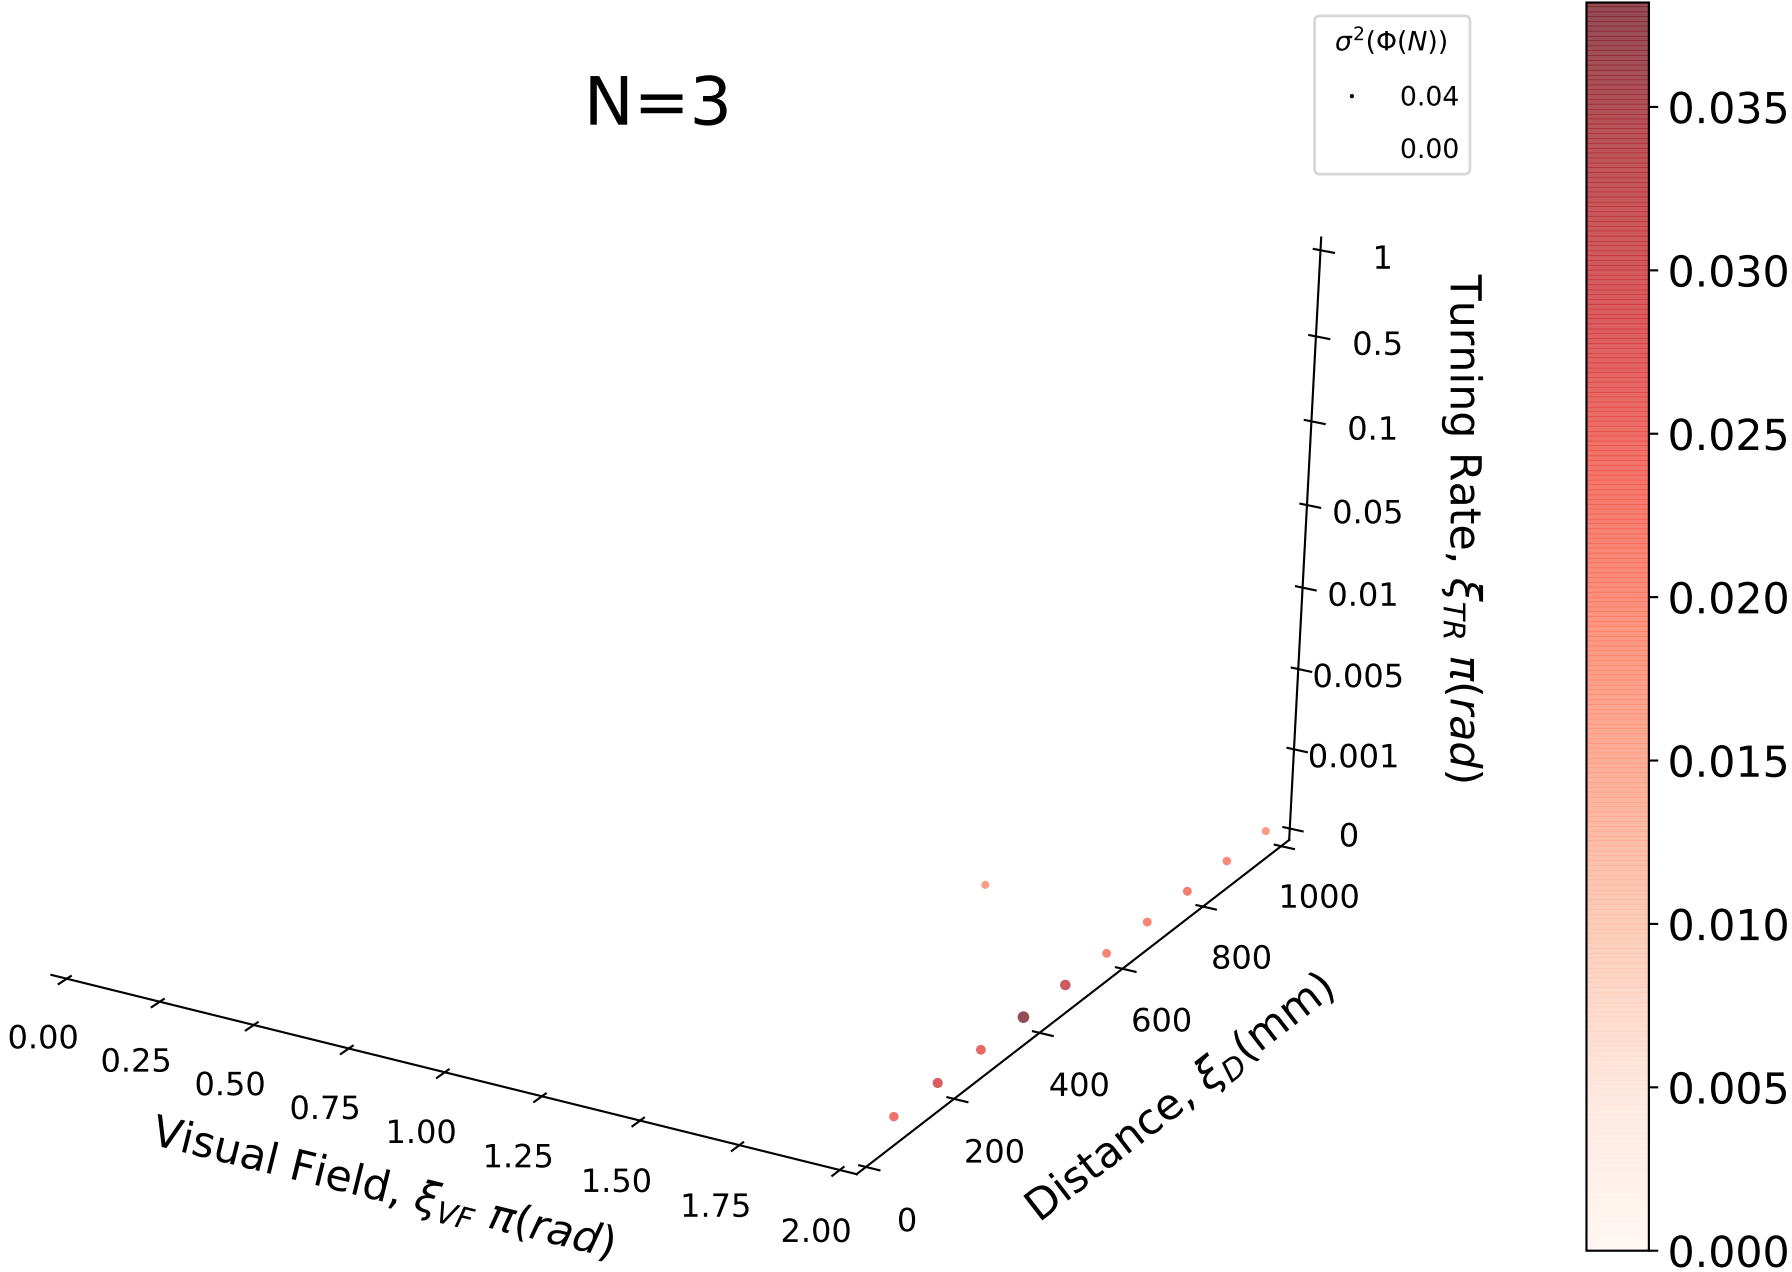

N=4

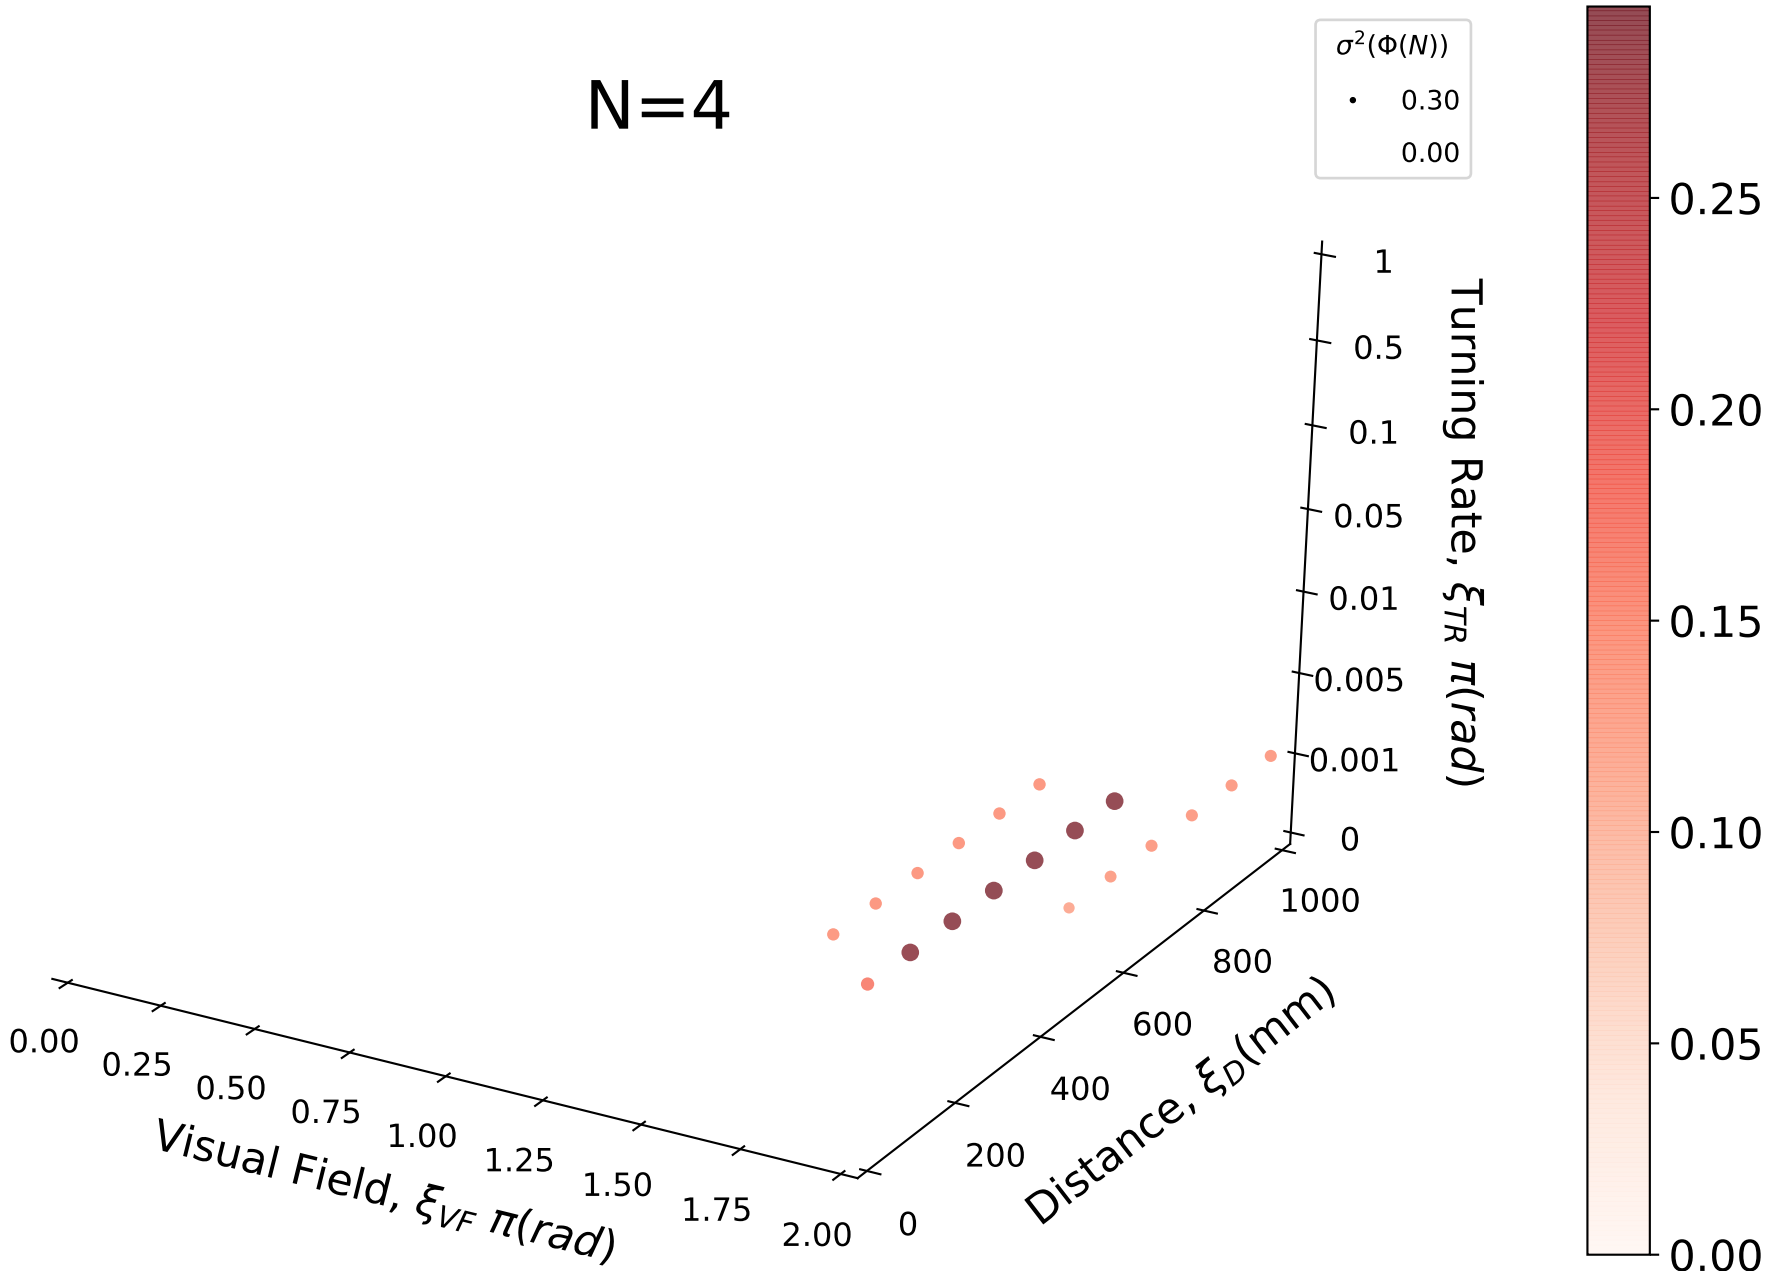

N=5

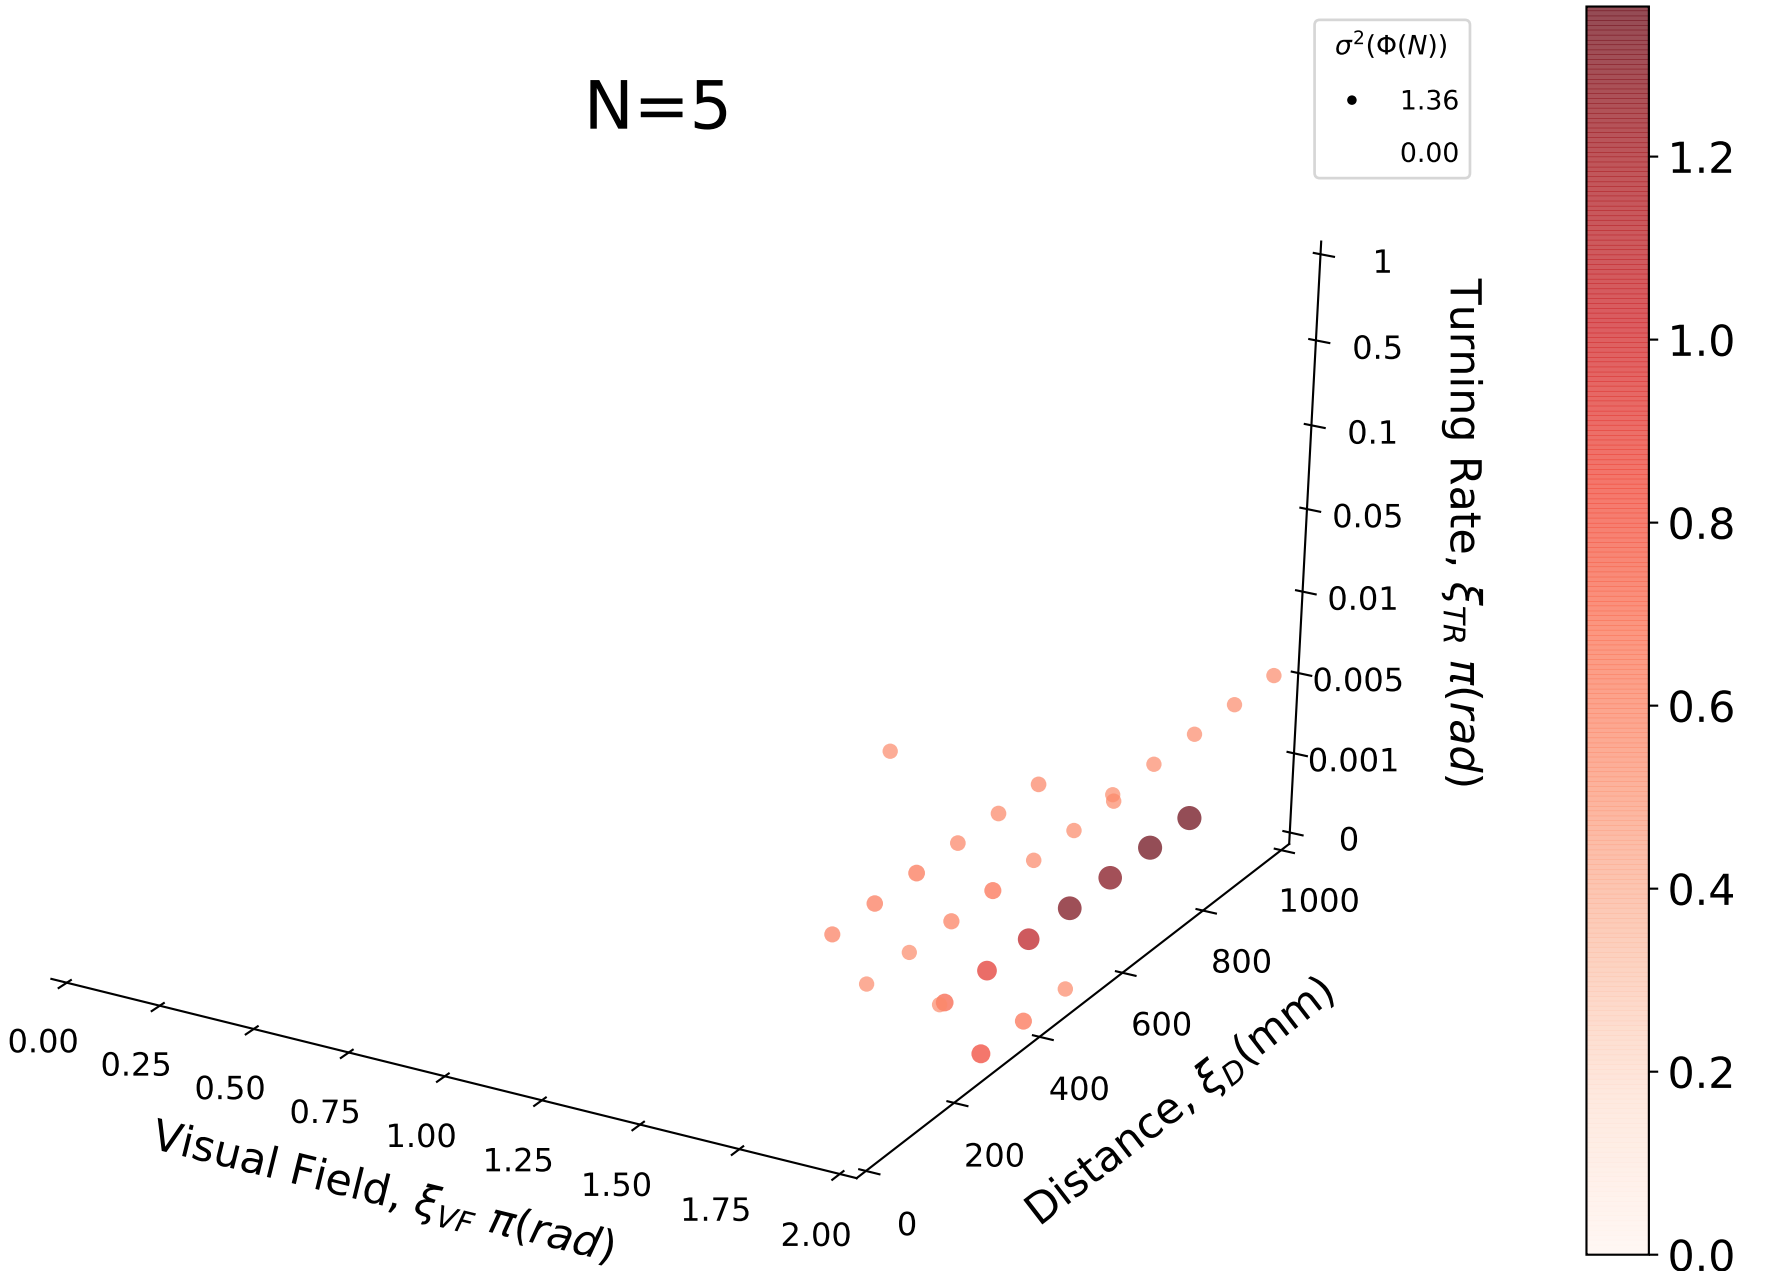

dt = 10/120 sec

N=2

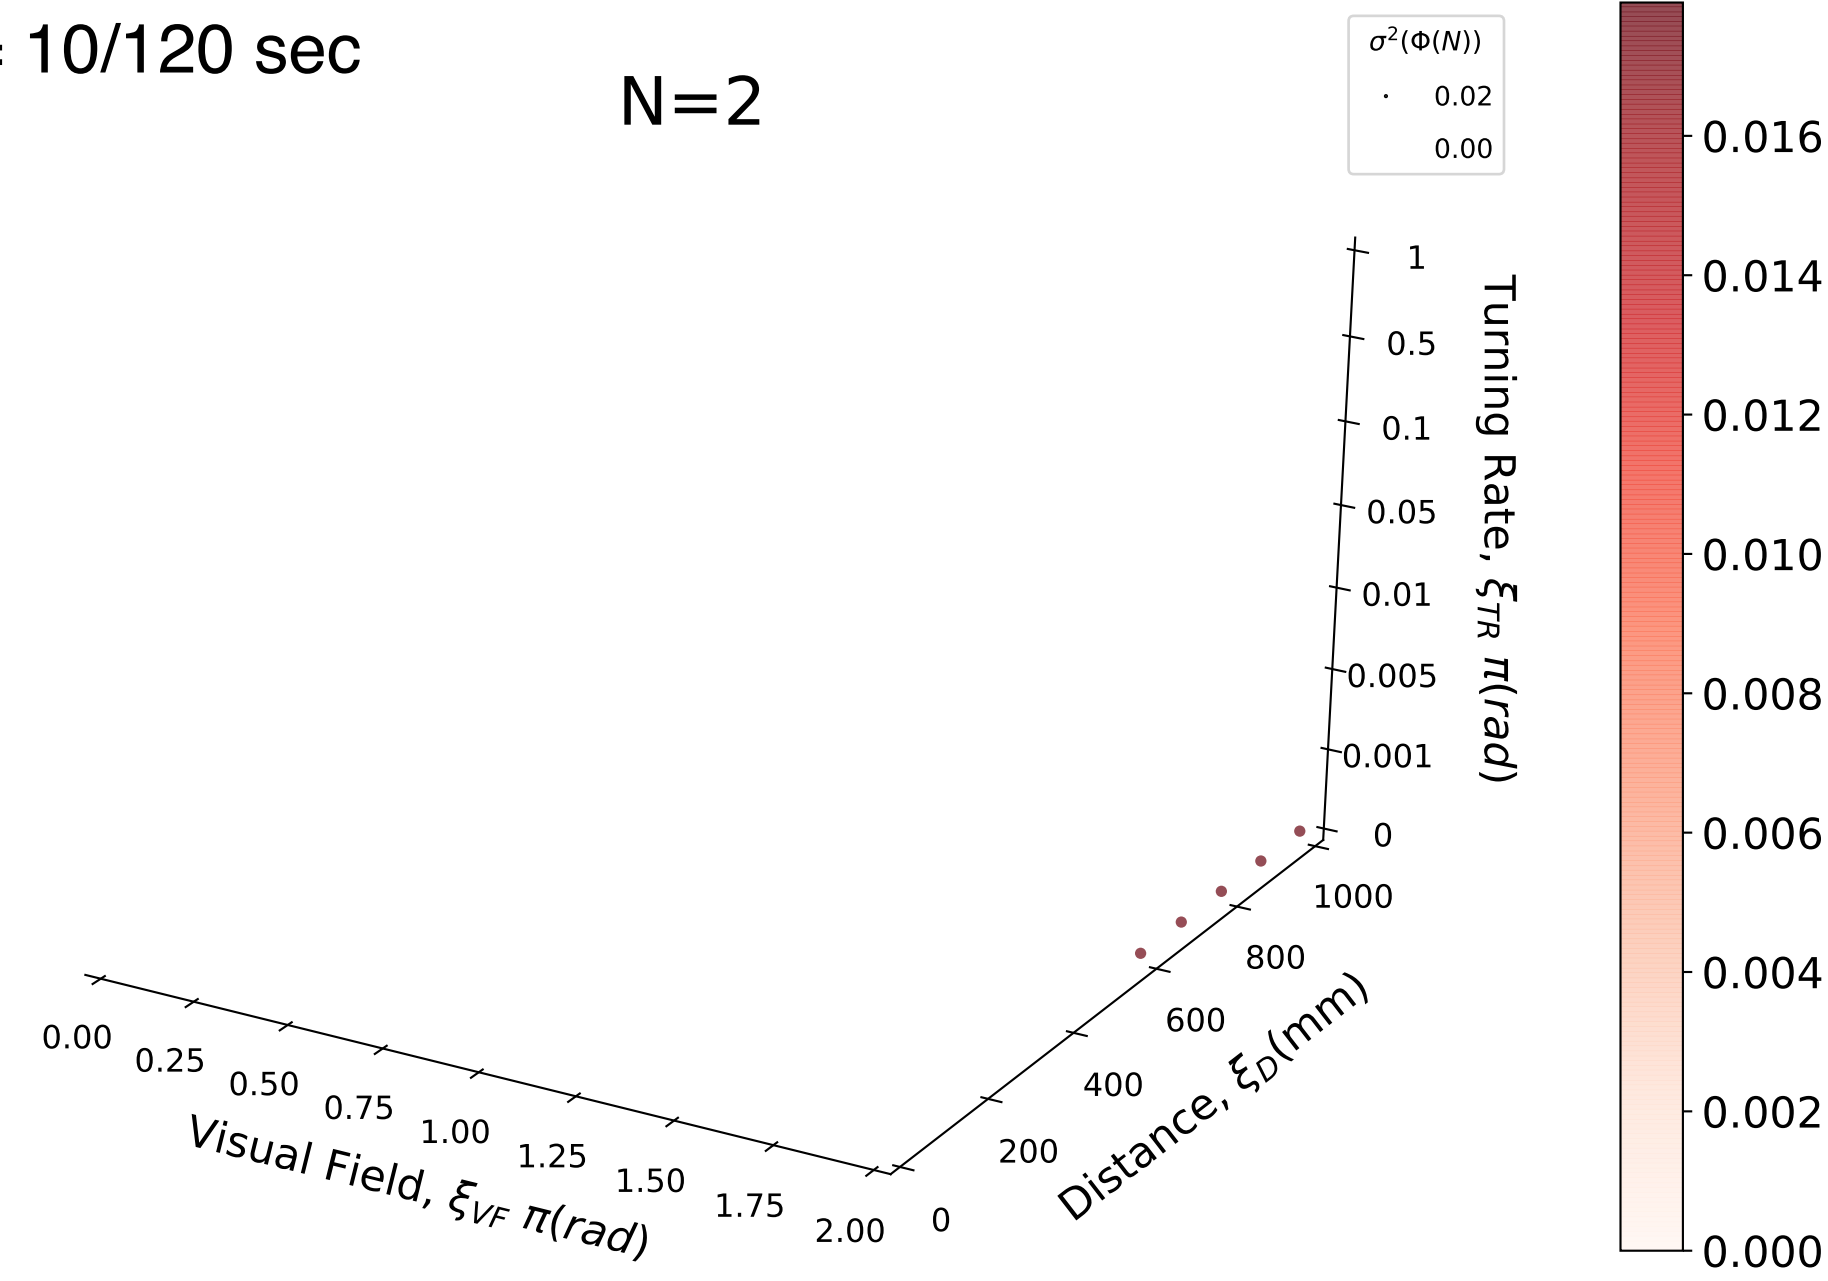

N=3

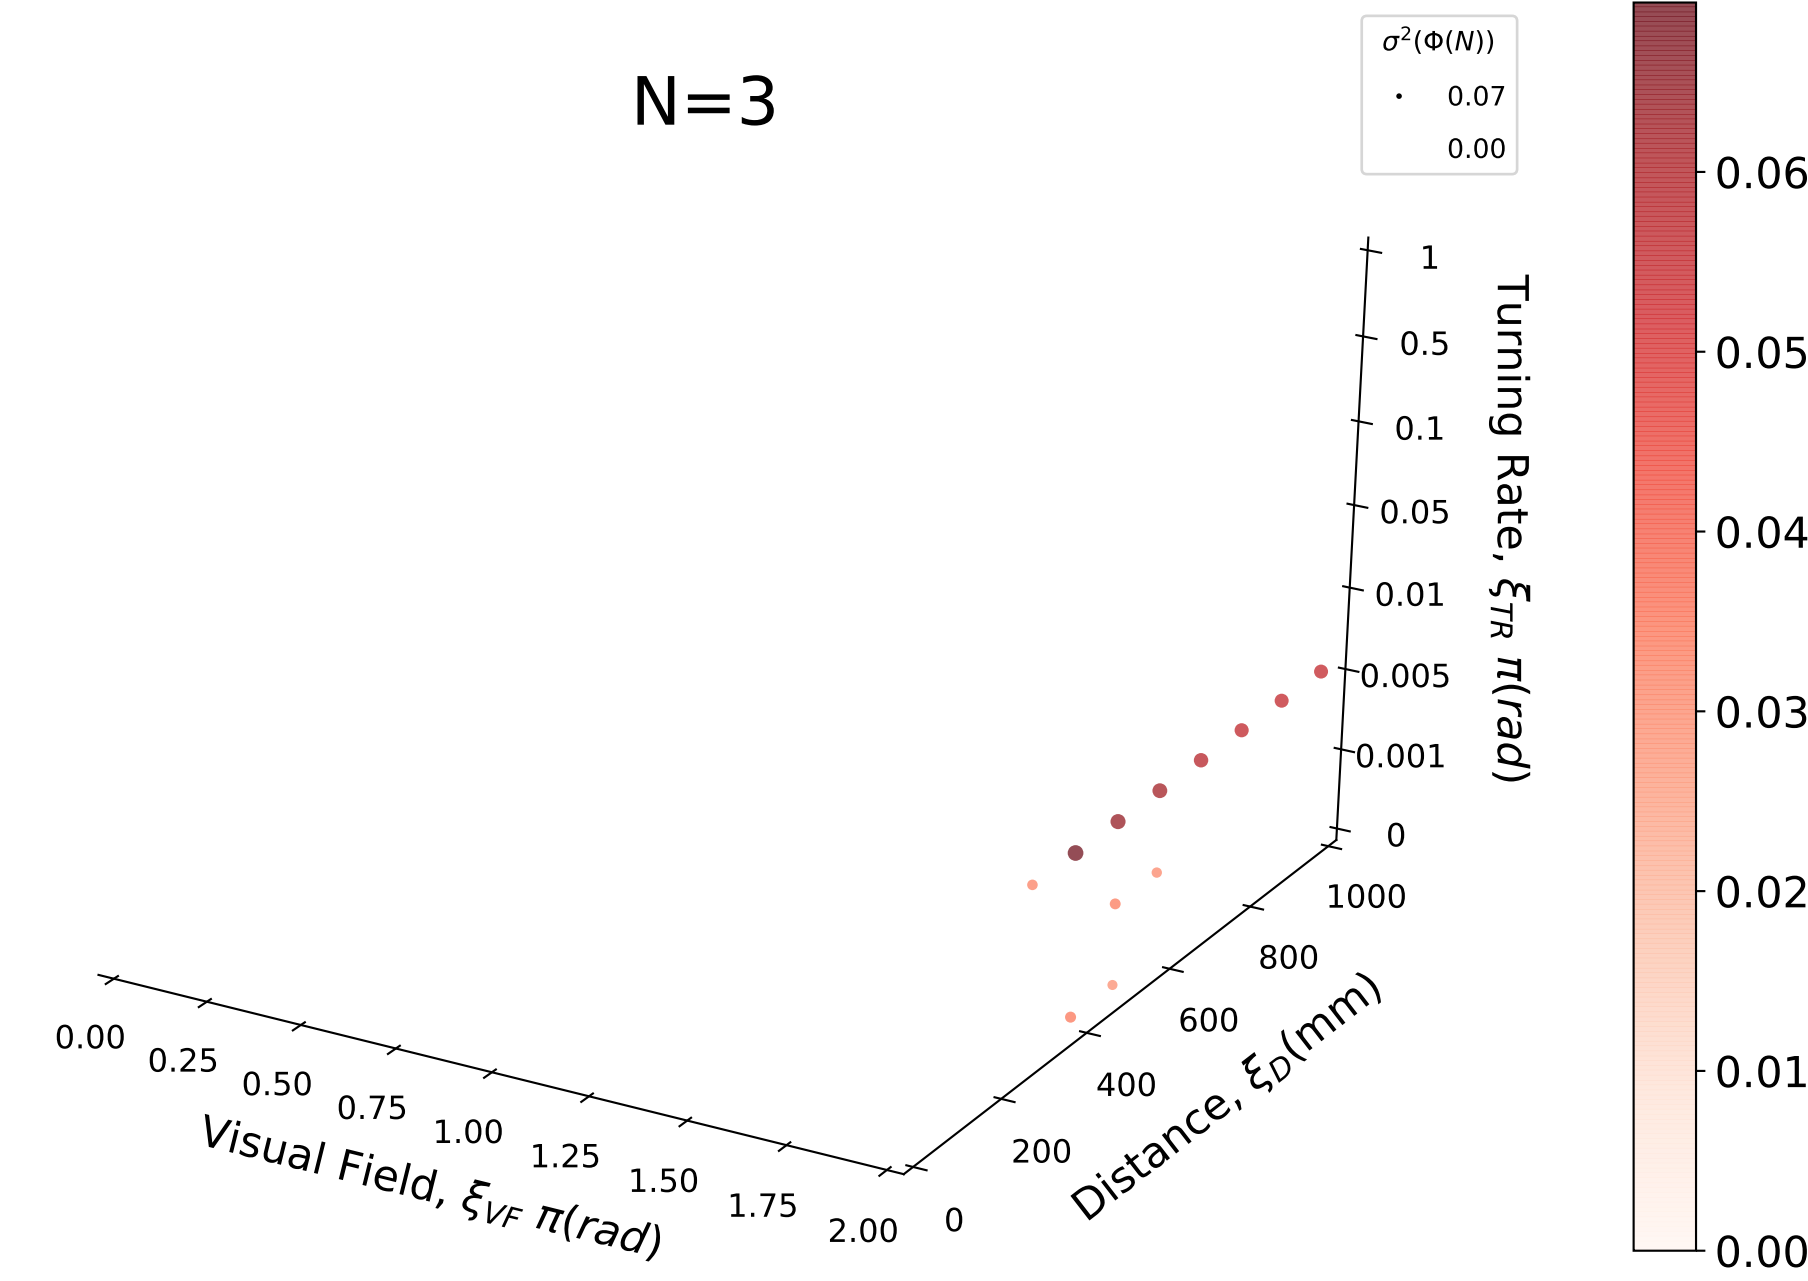

N=4

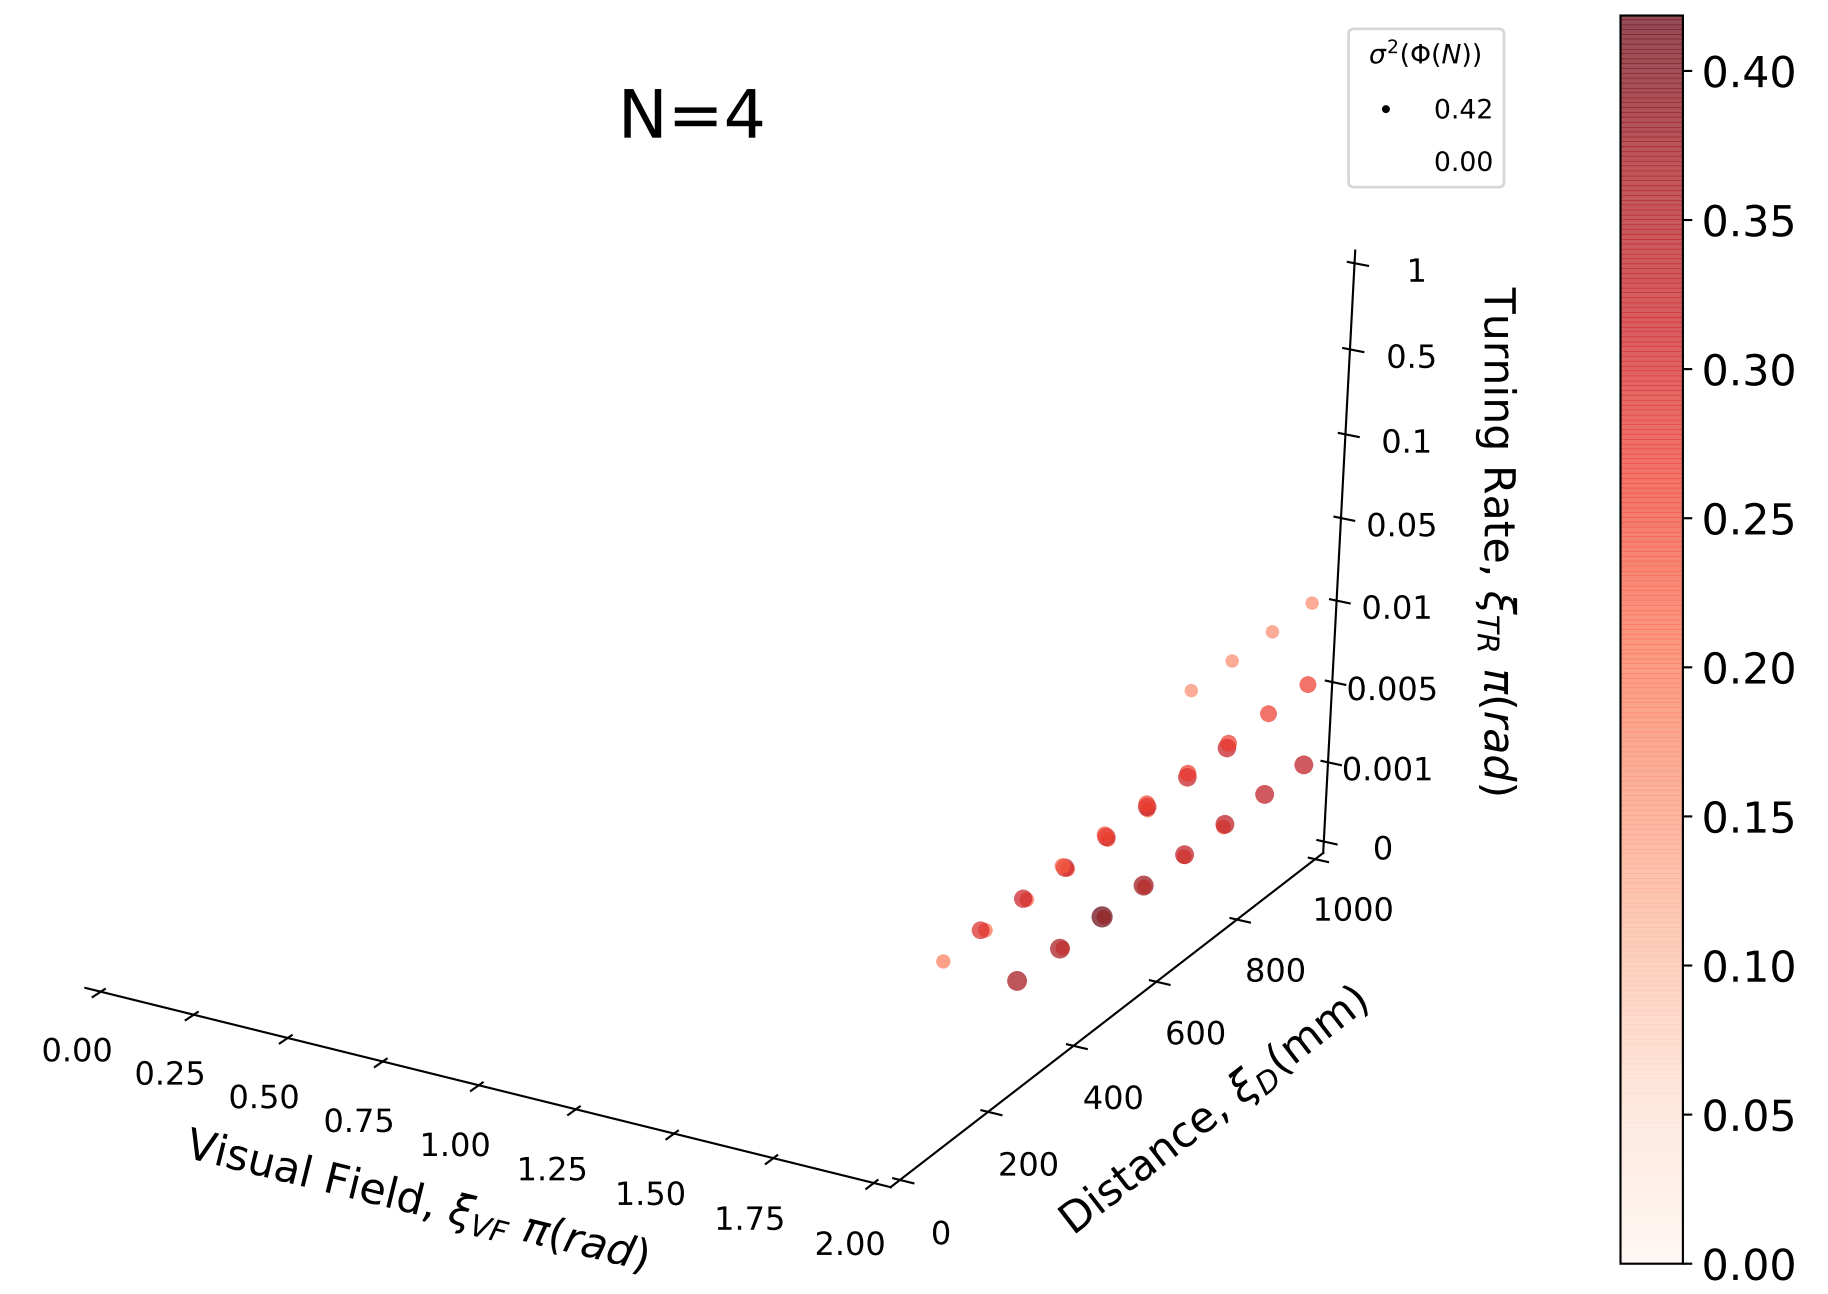

N=5

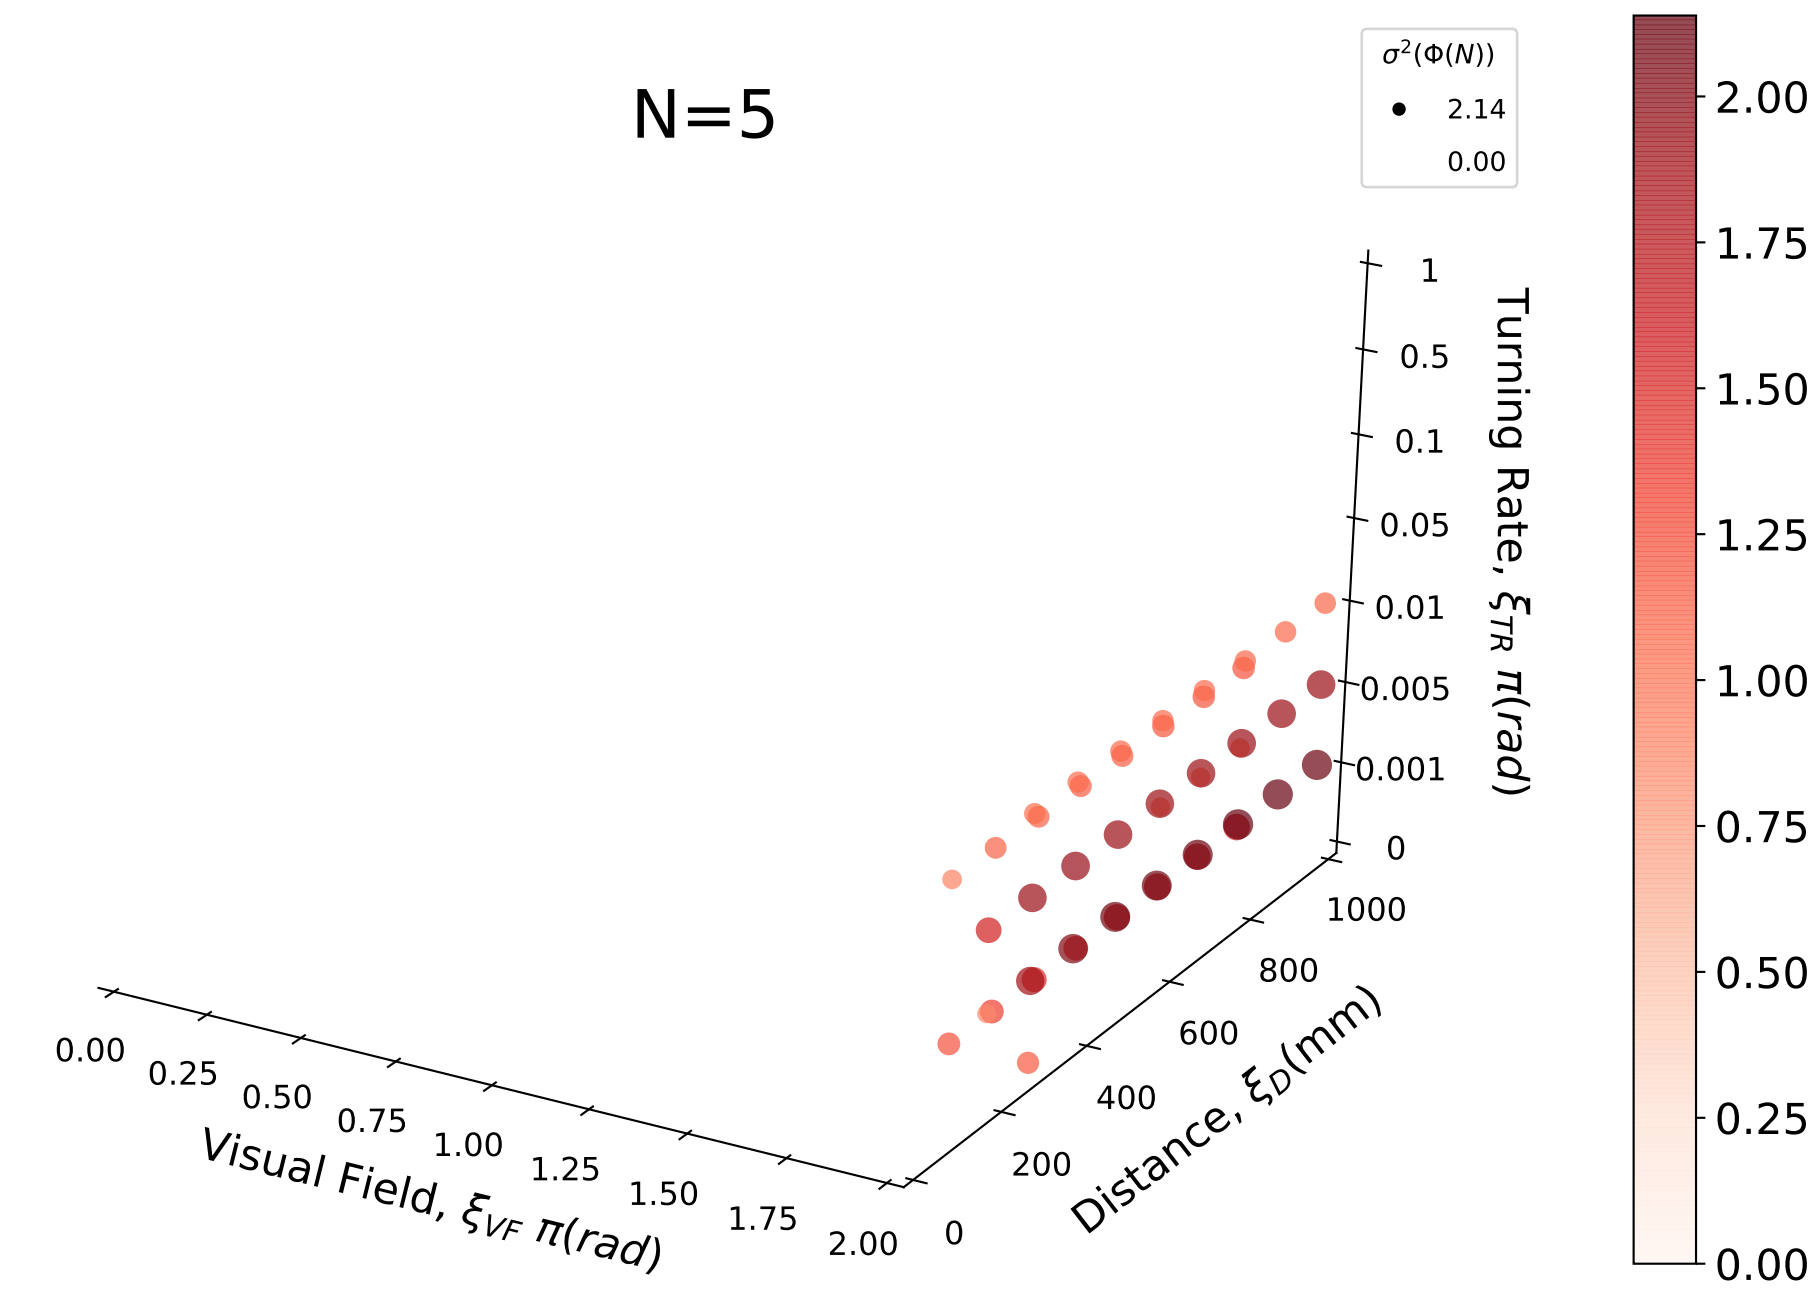

dt = 20/120 sec

N=2

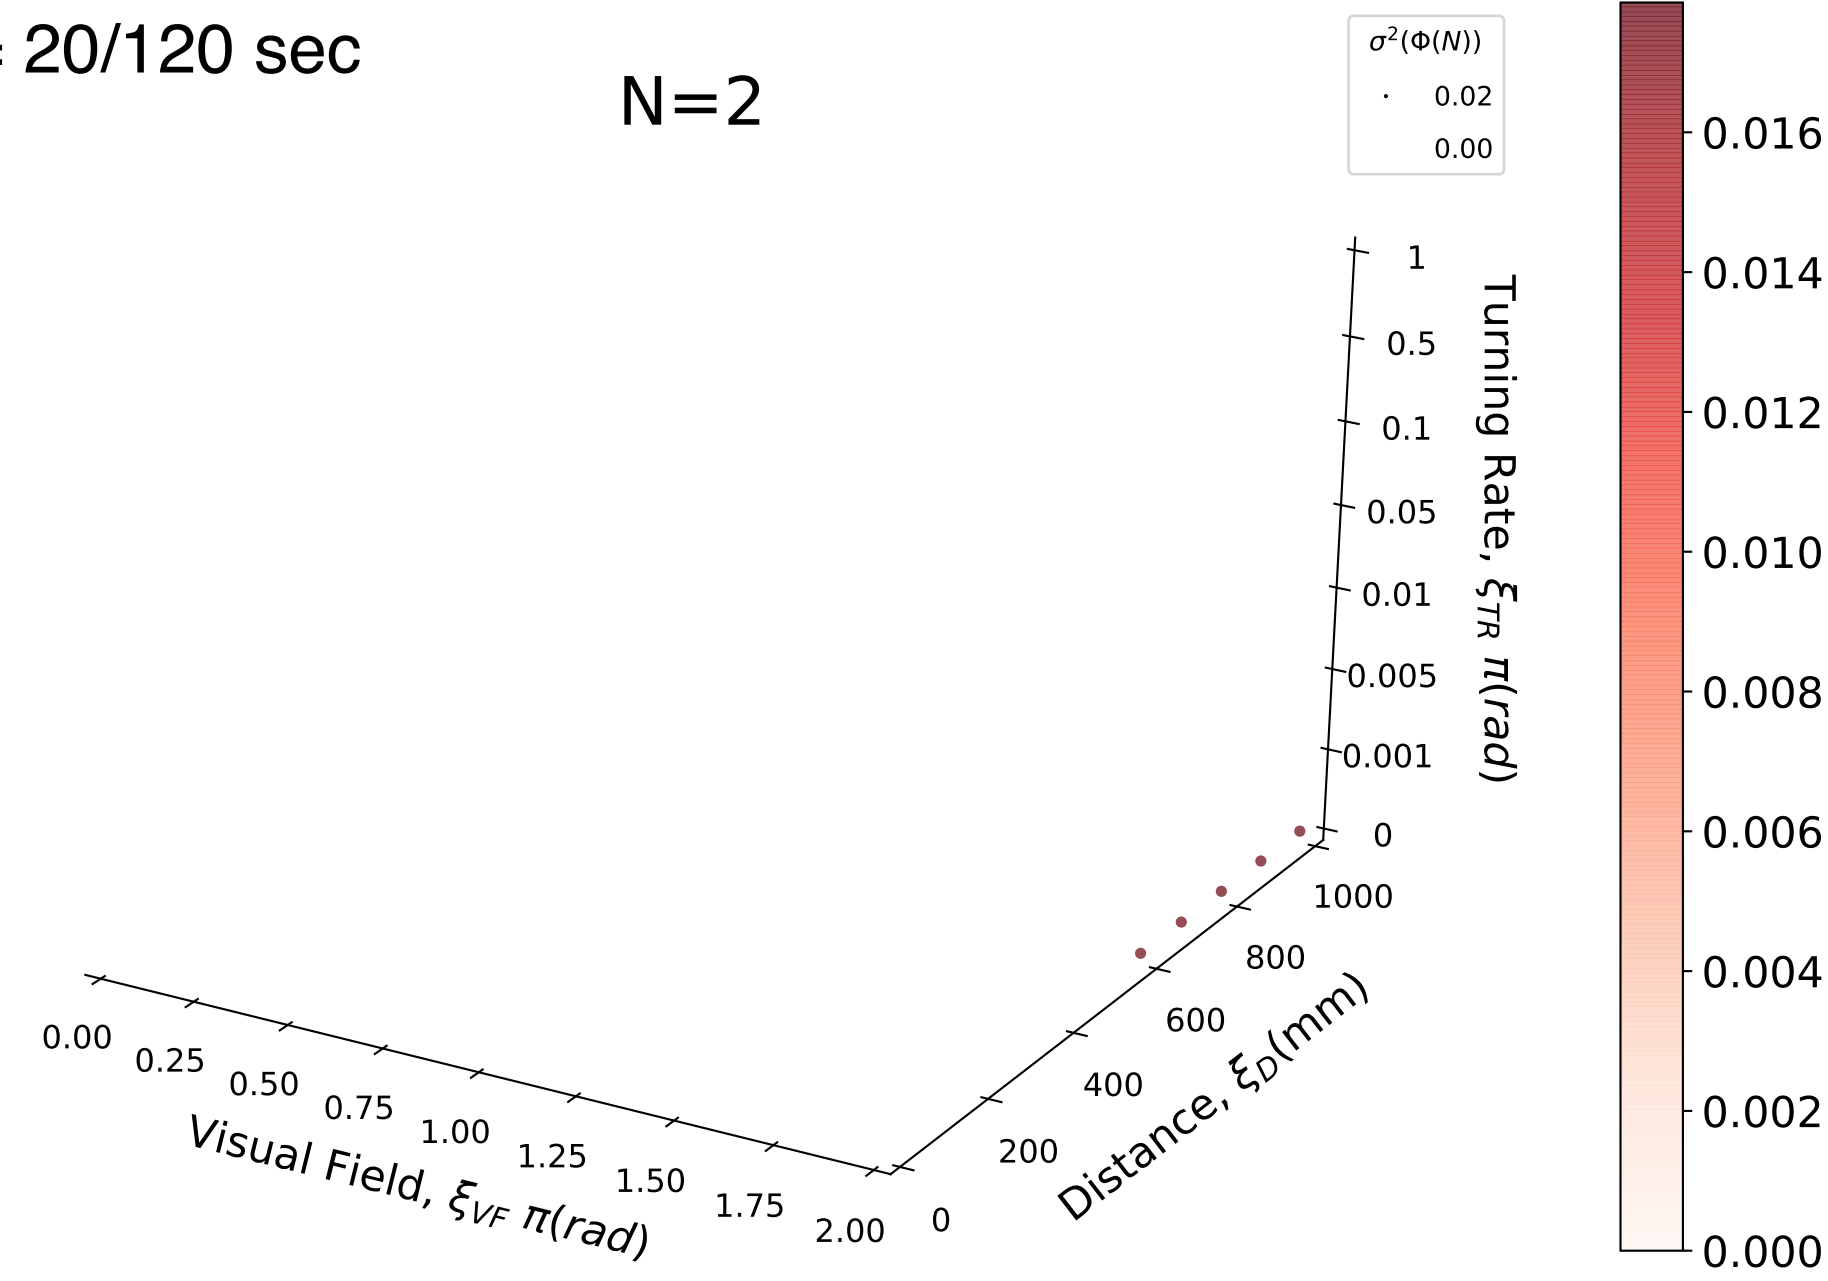

N=3

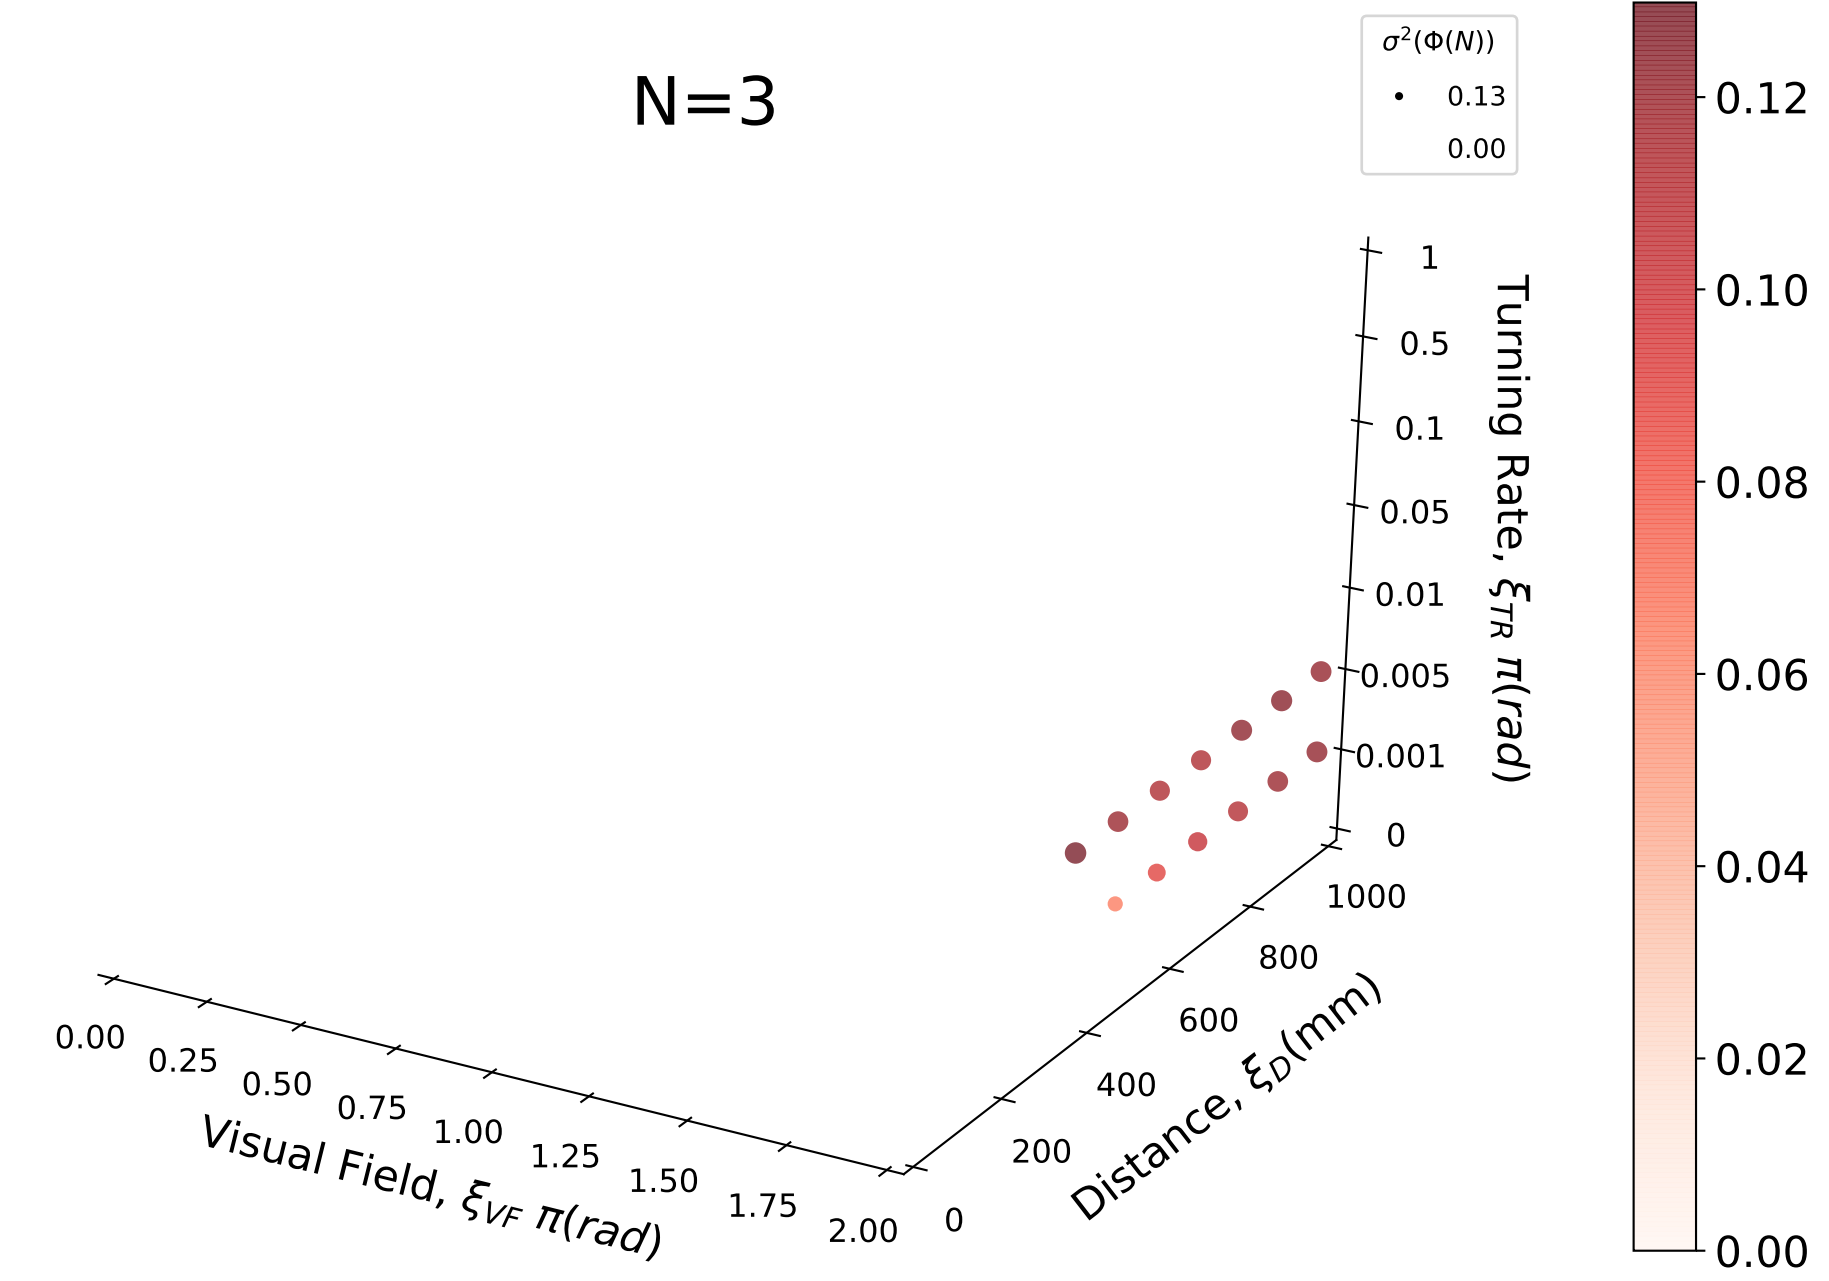

N=4

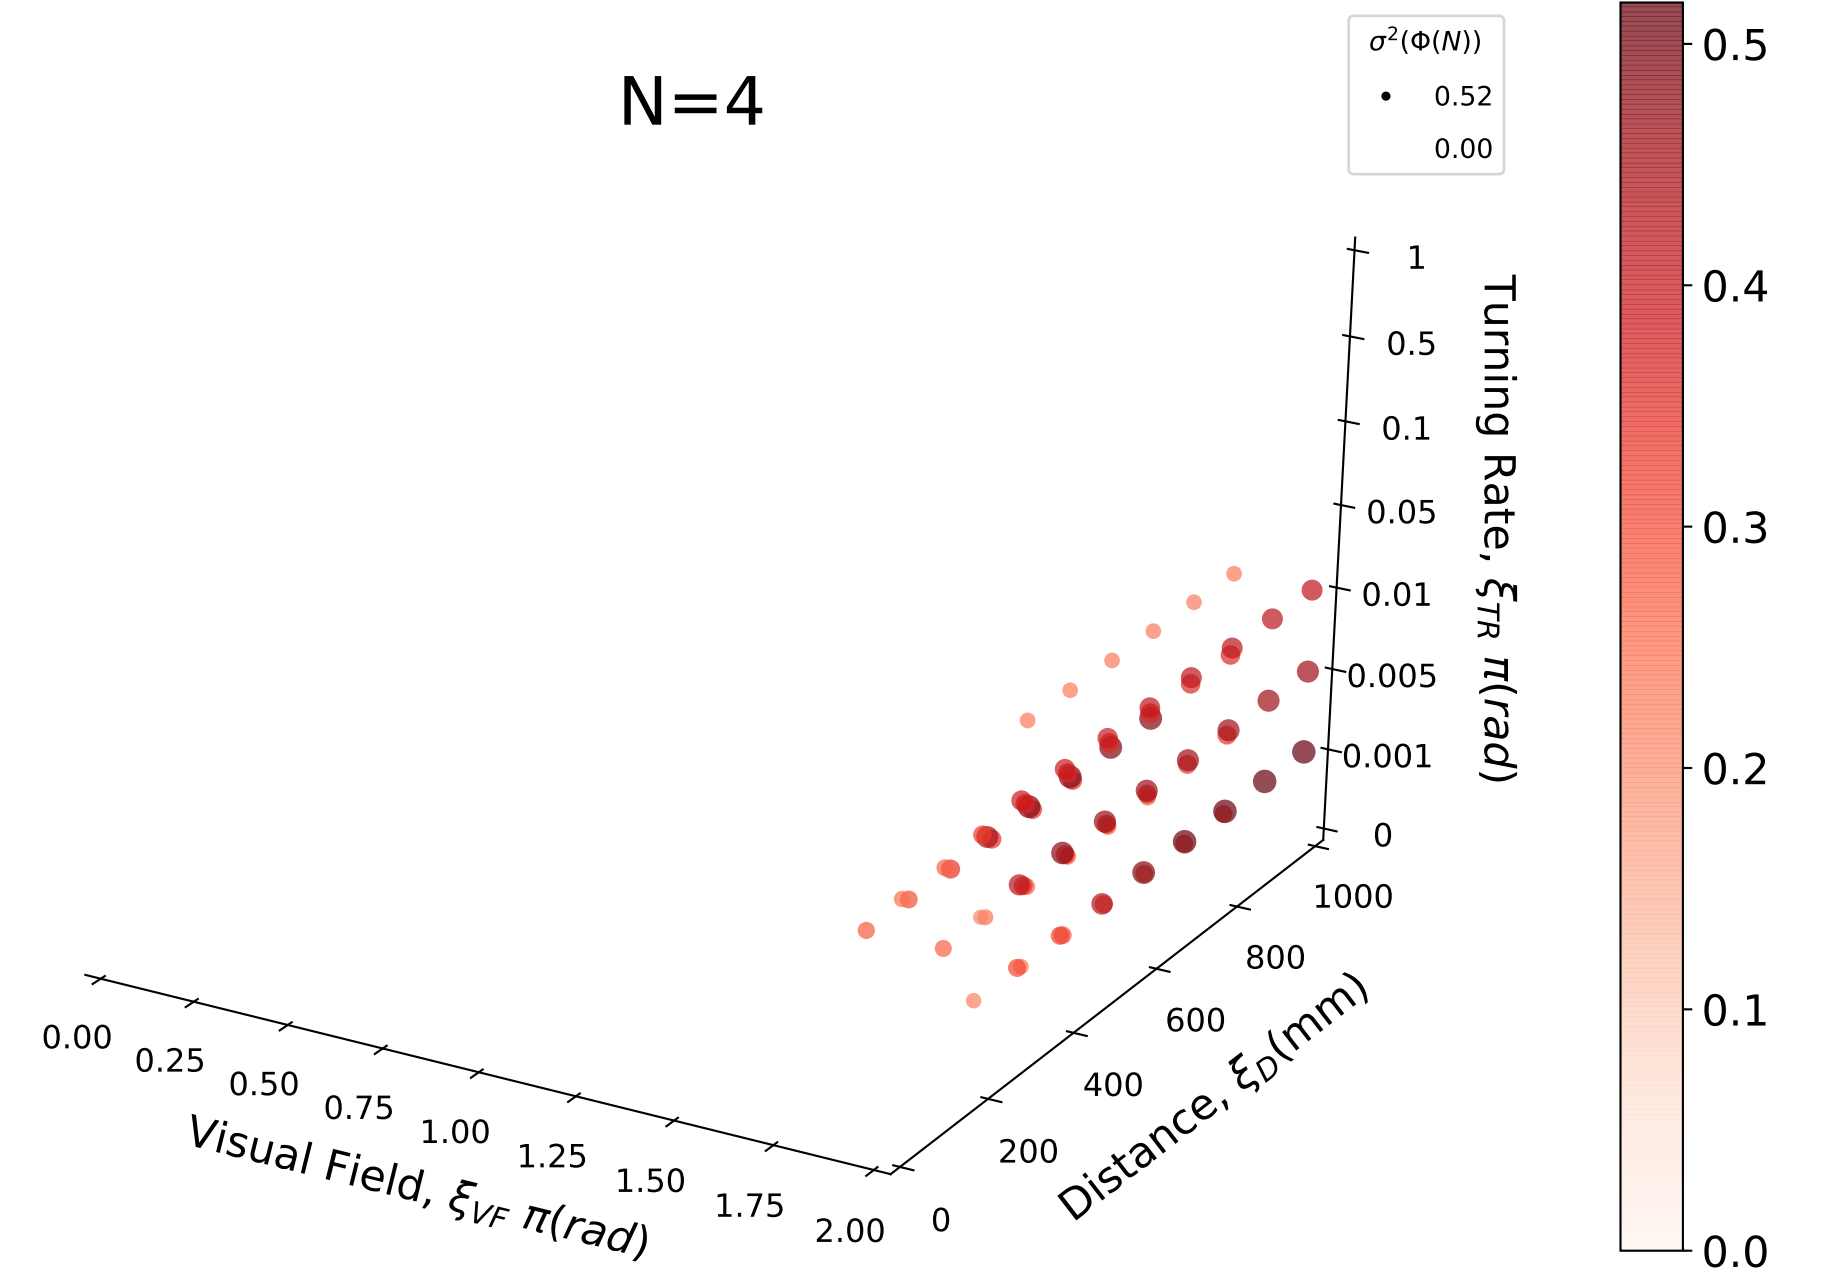

N=5

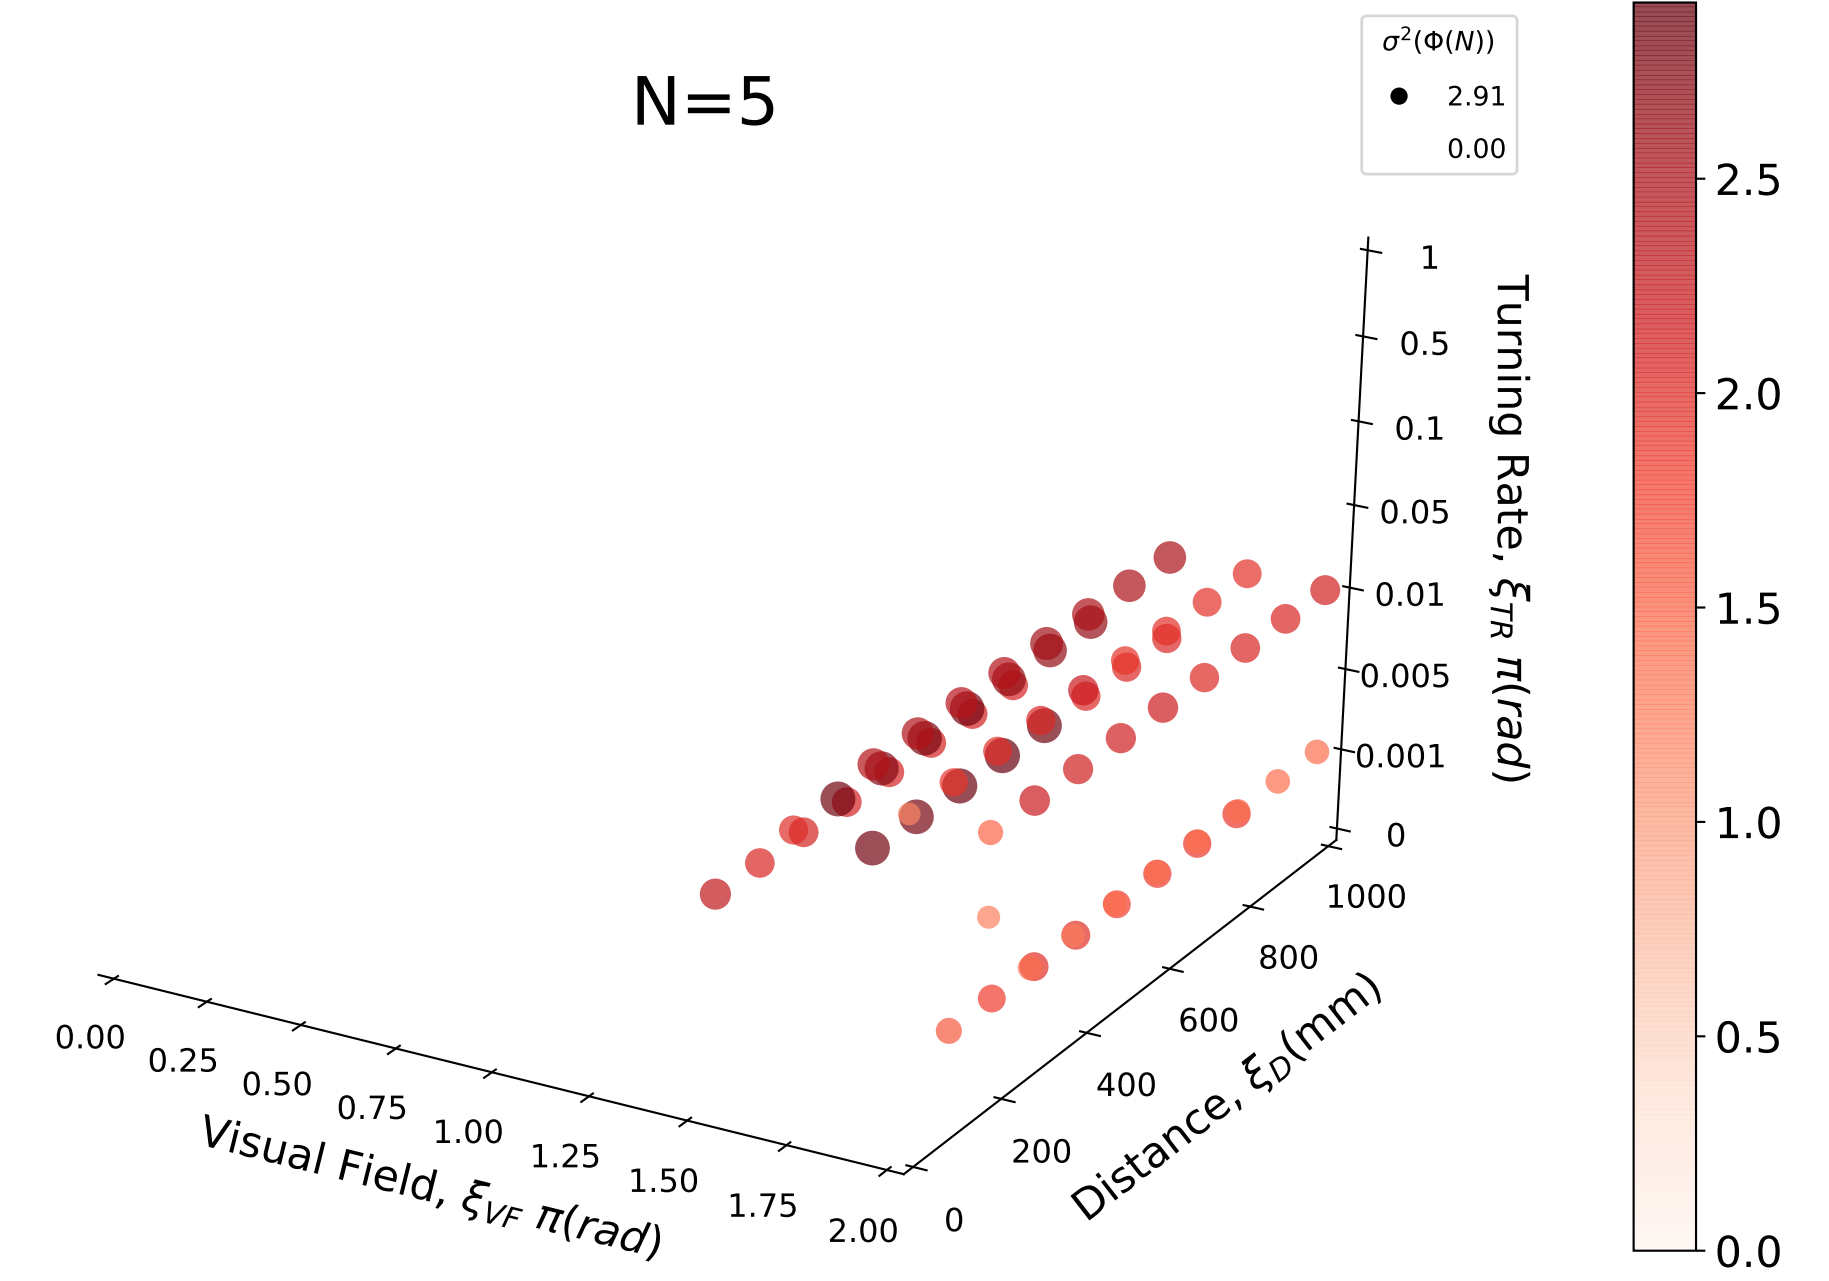

dt = 40/120 sec

N=2

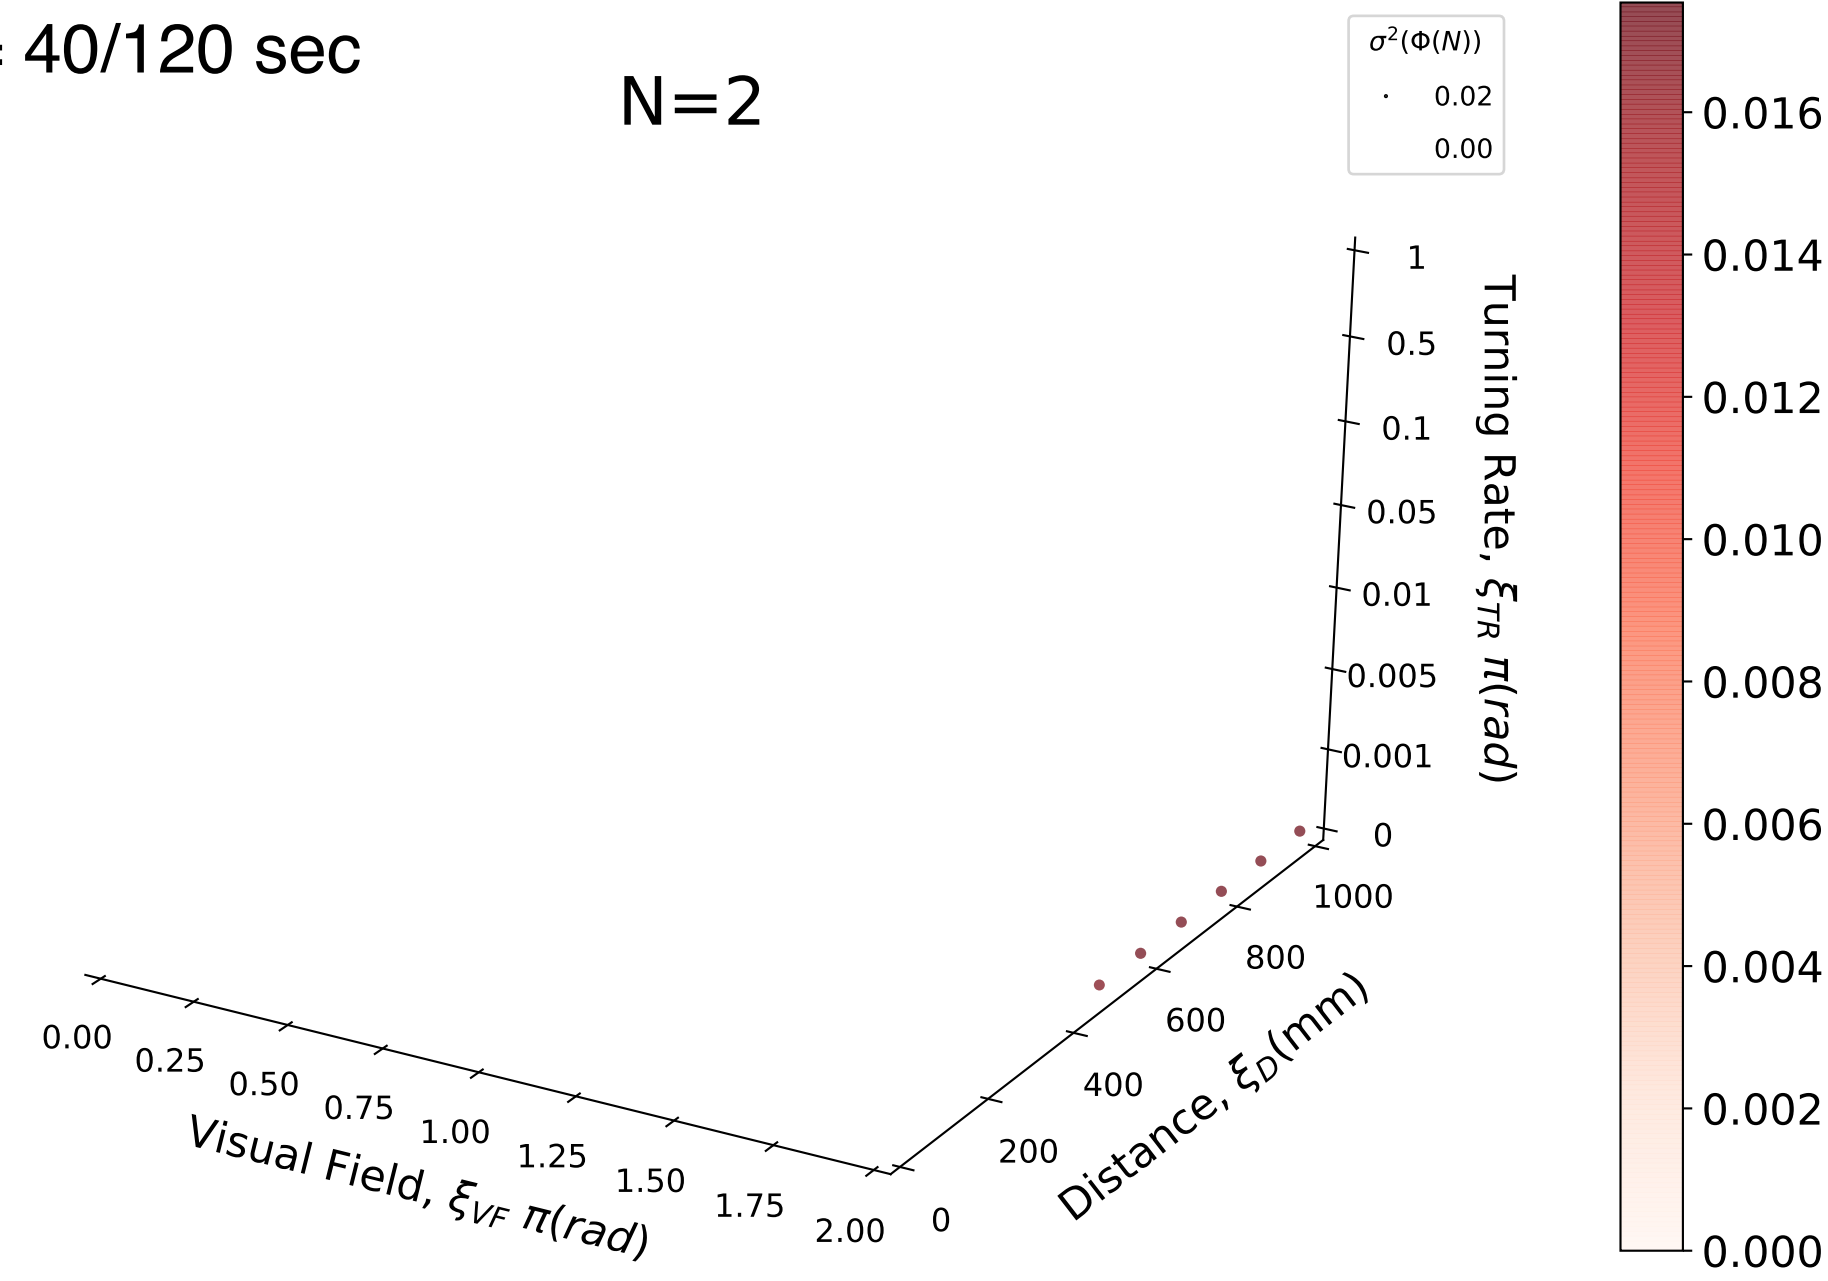

N=3

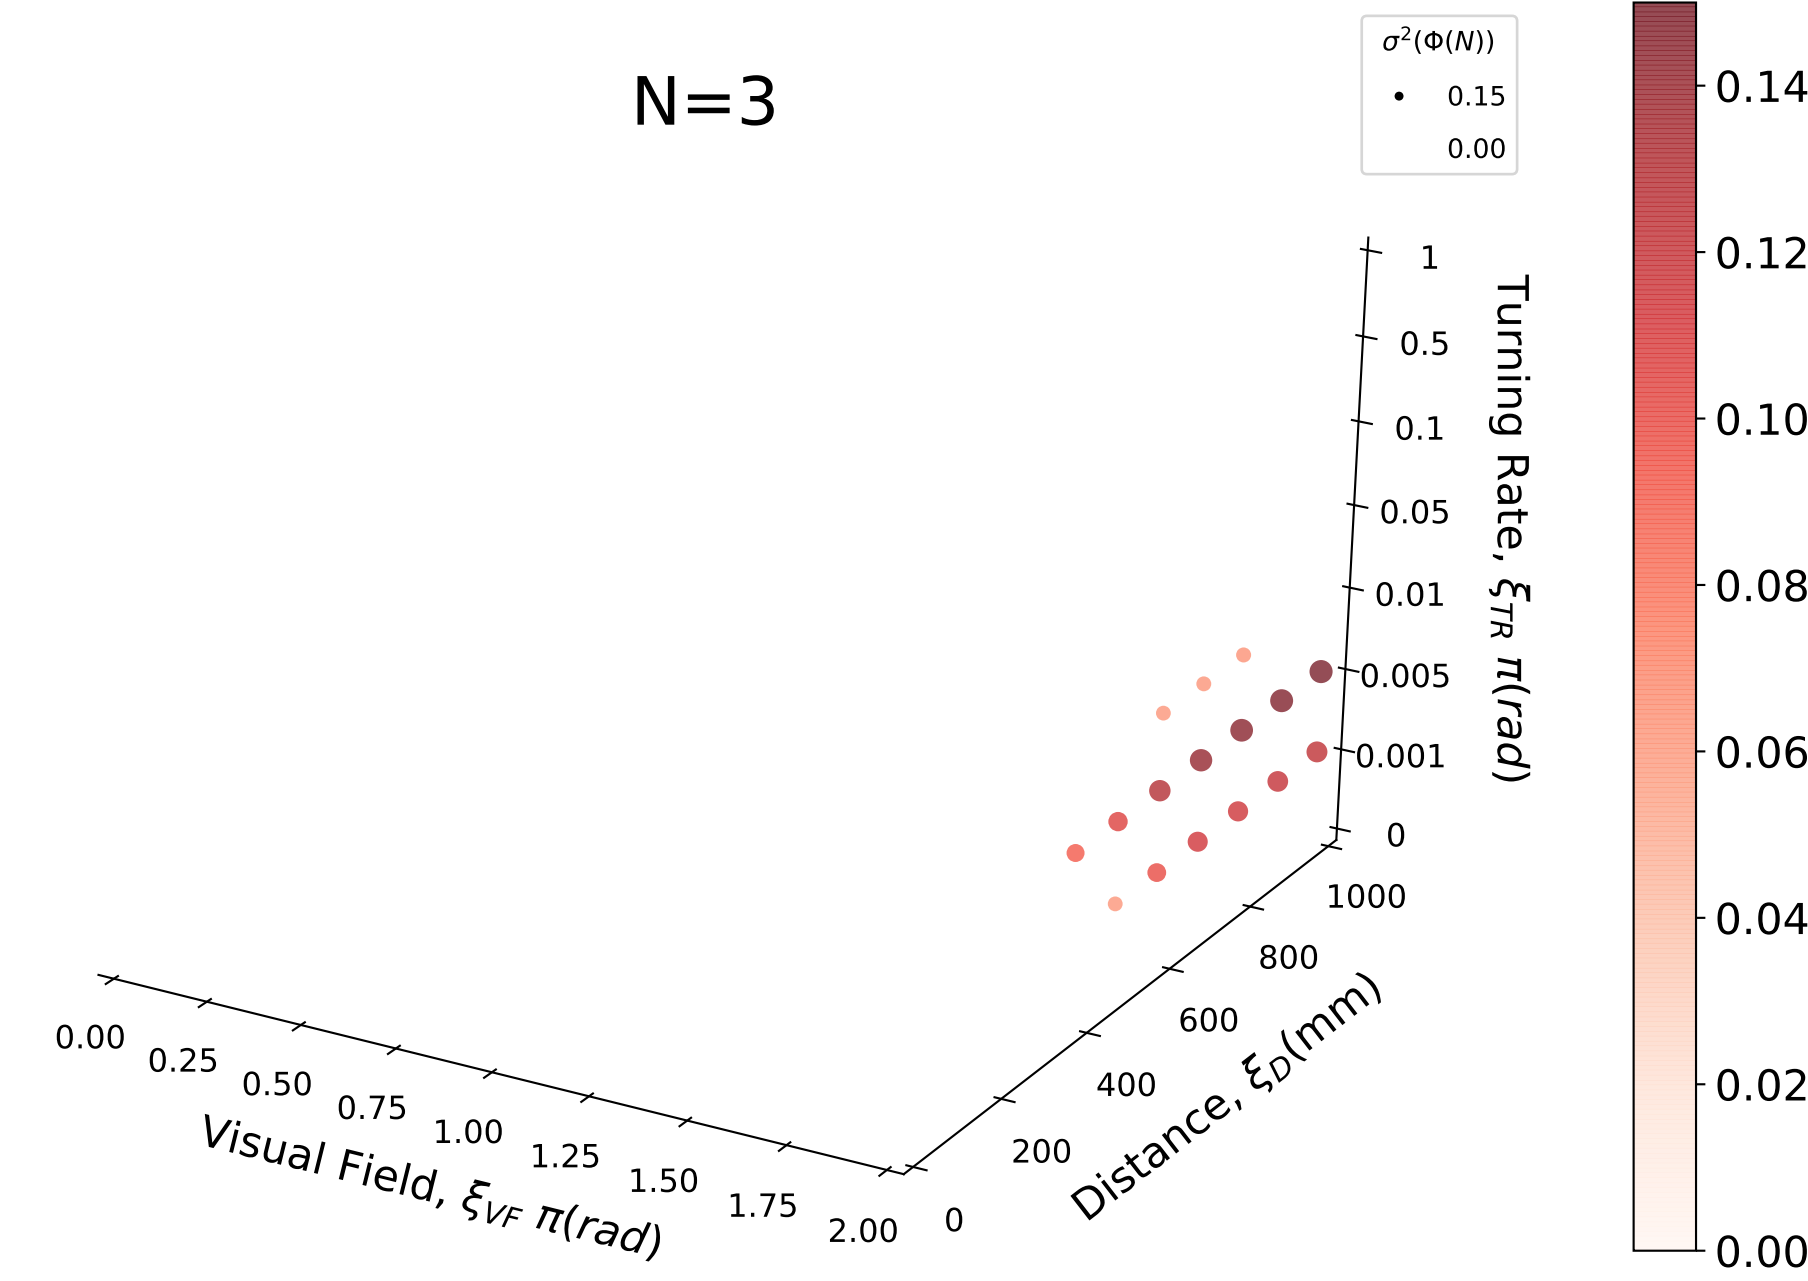

N=4

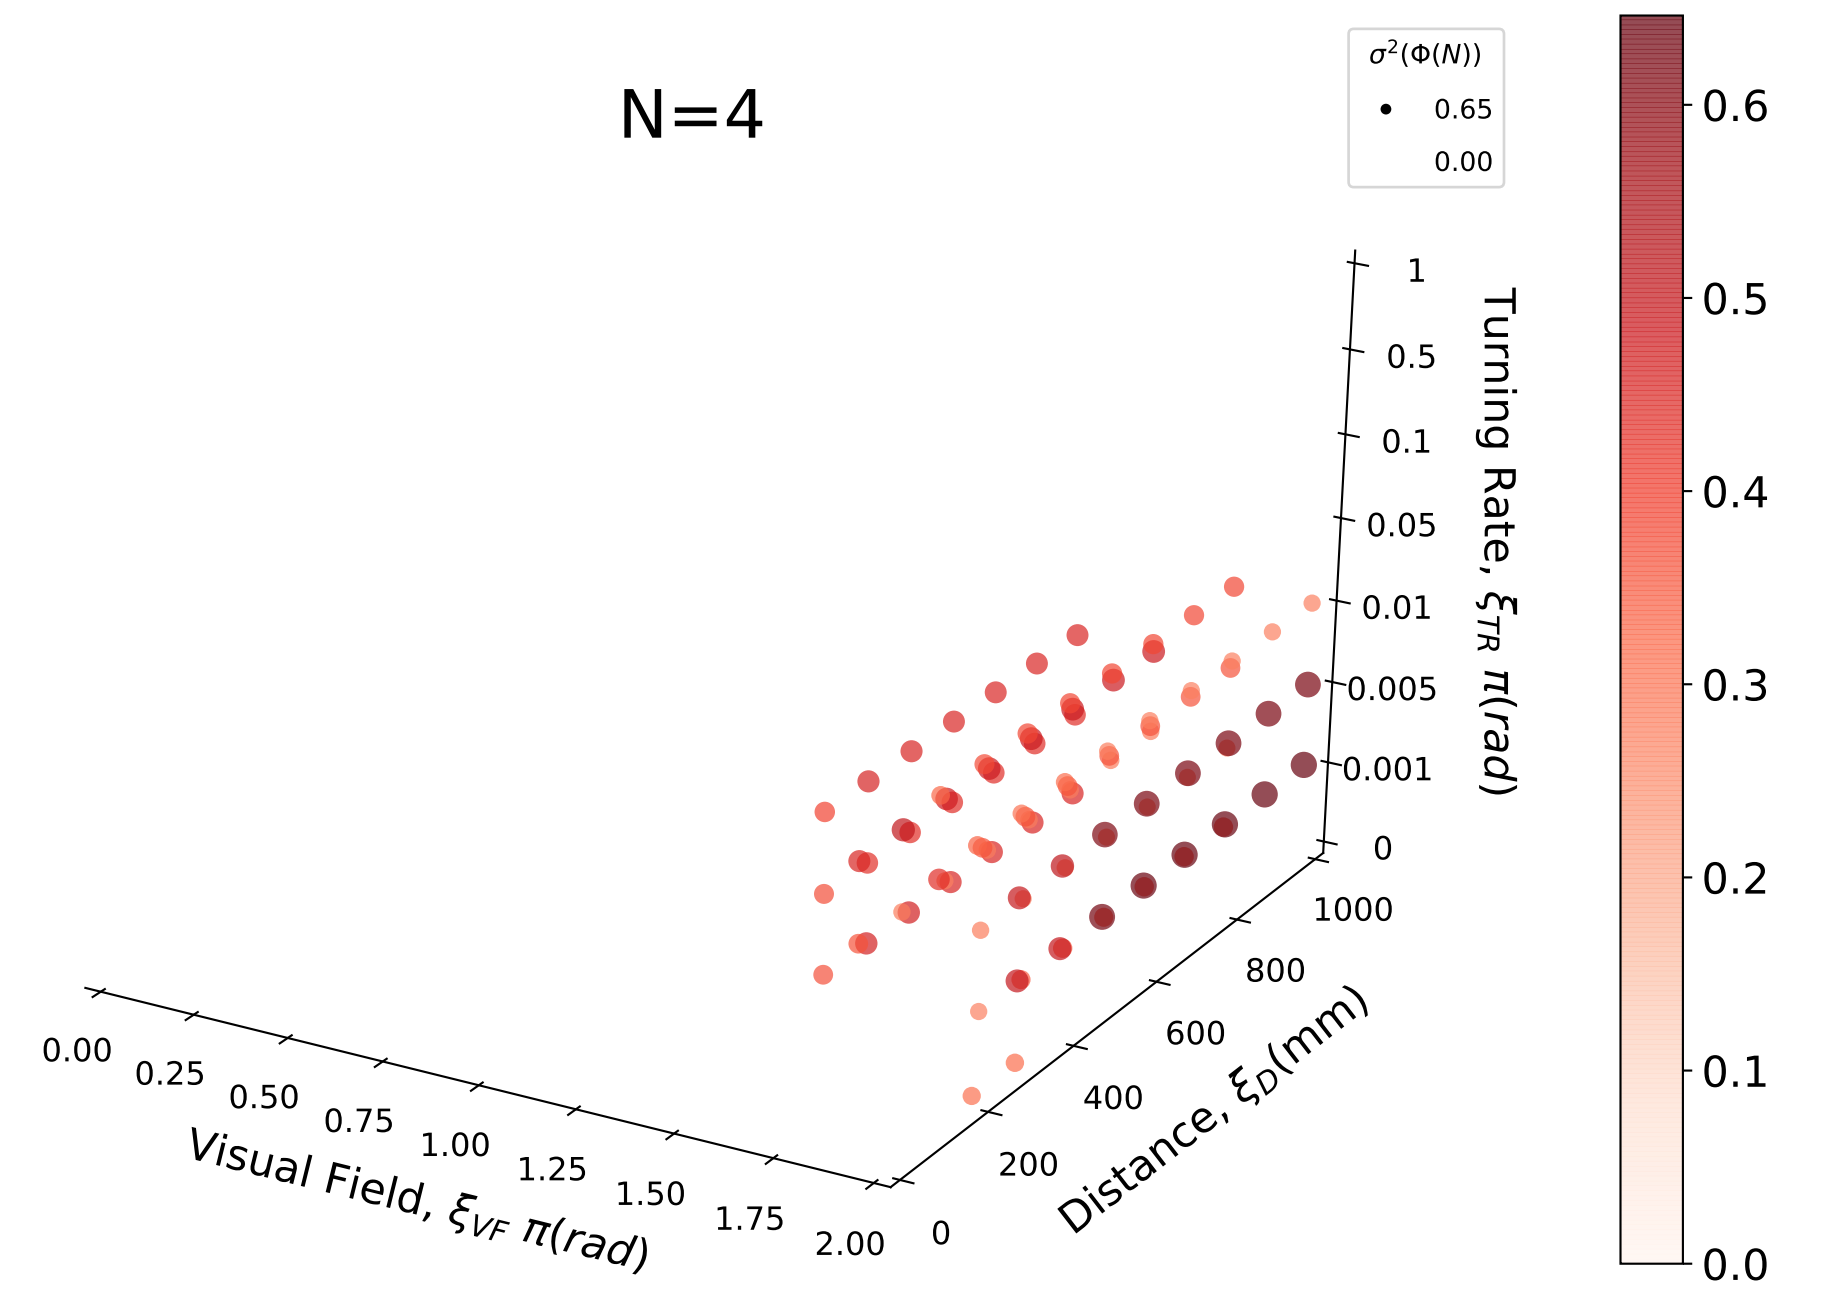

N=5

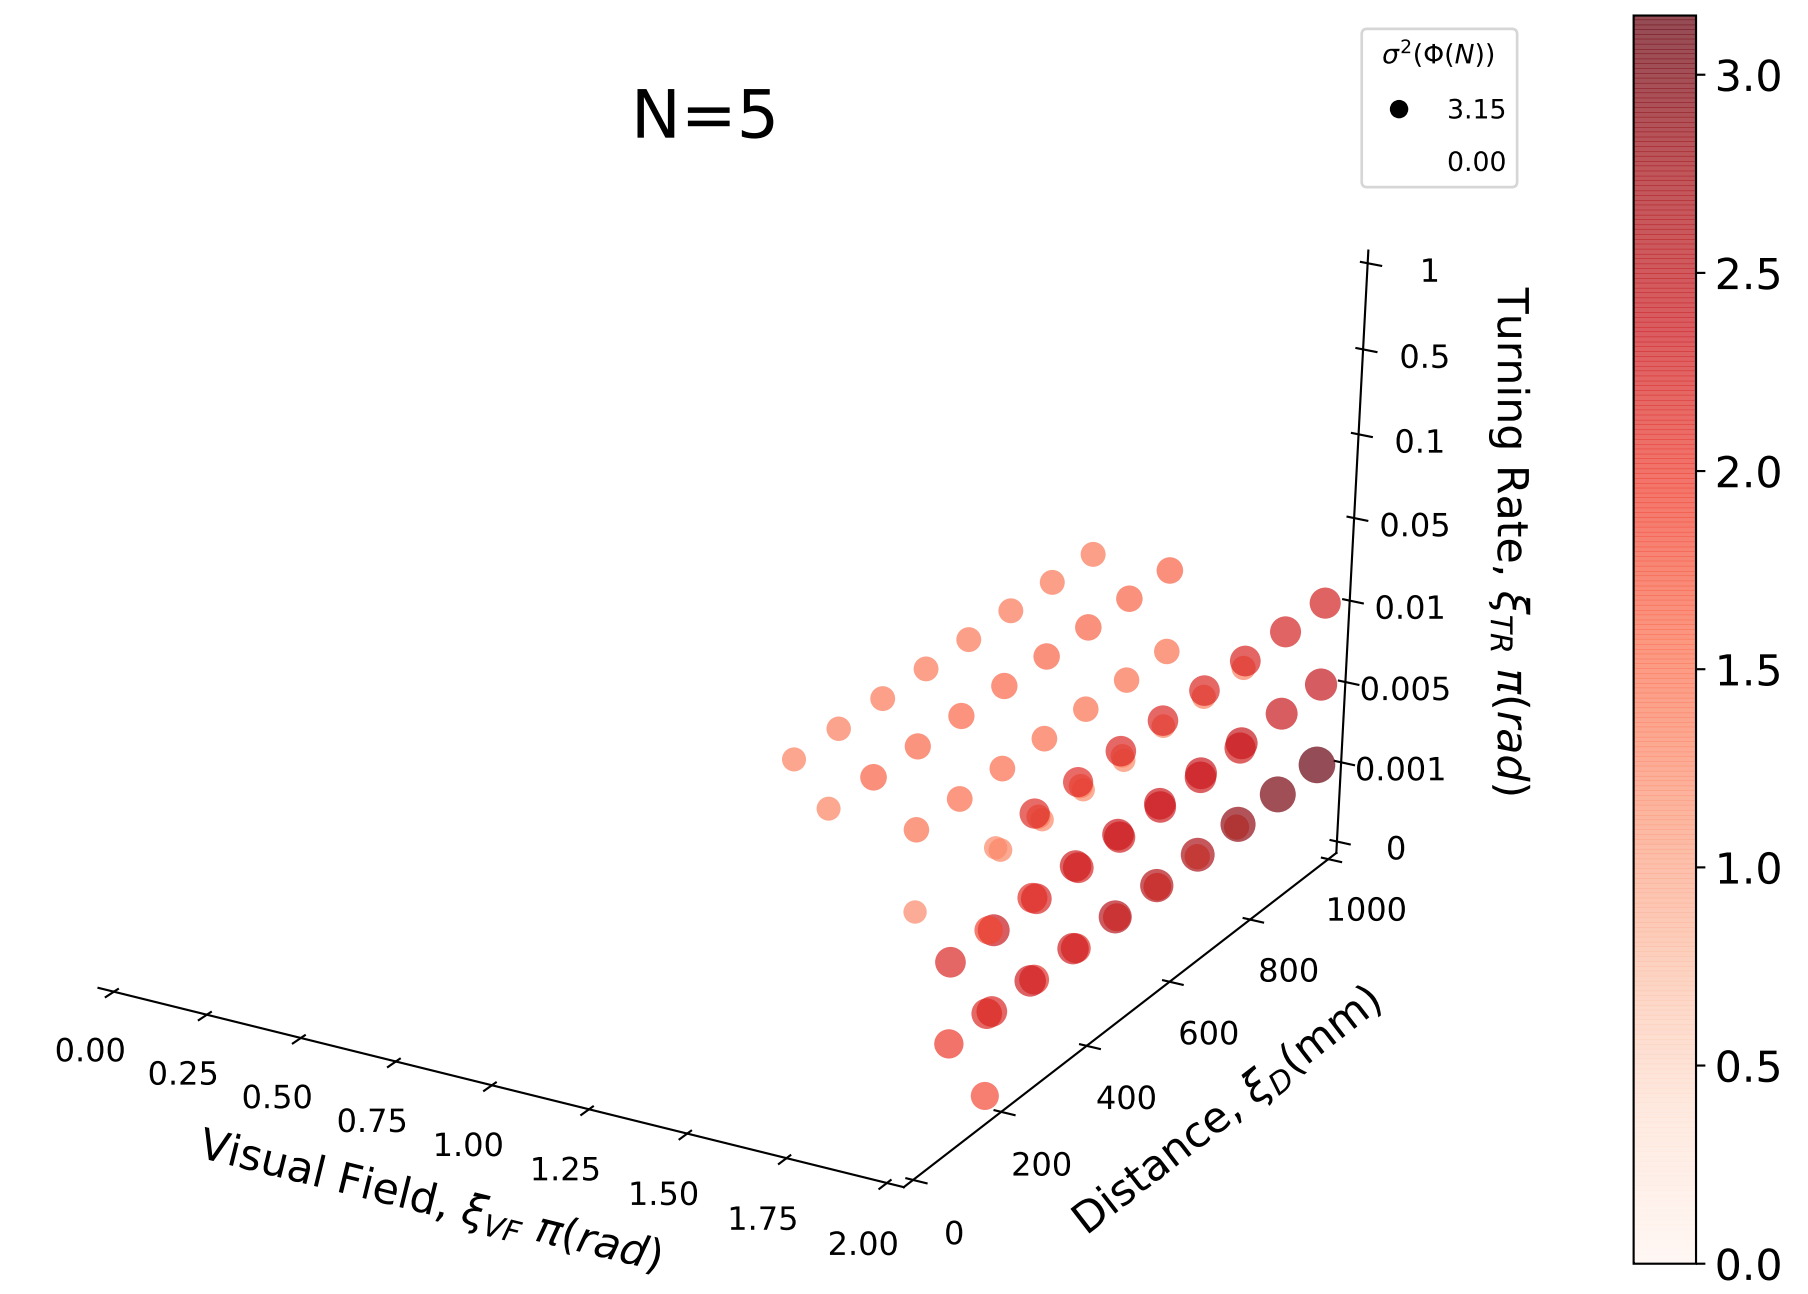

dt = 80/120 sec

N=2

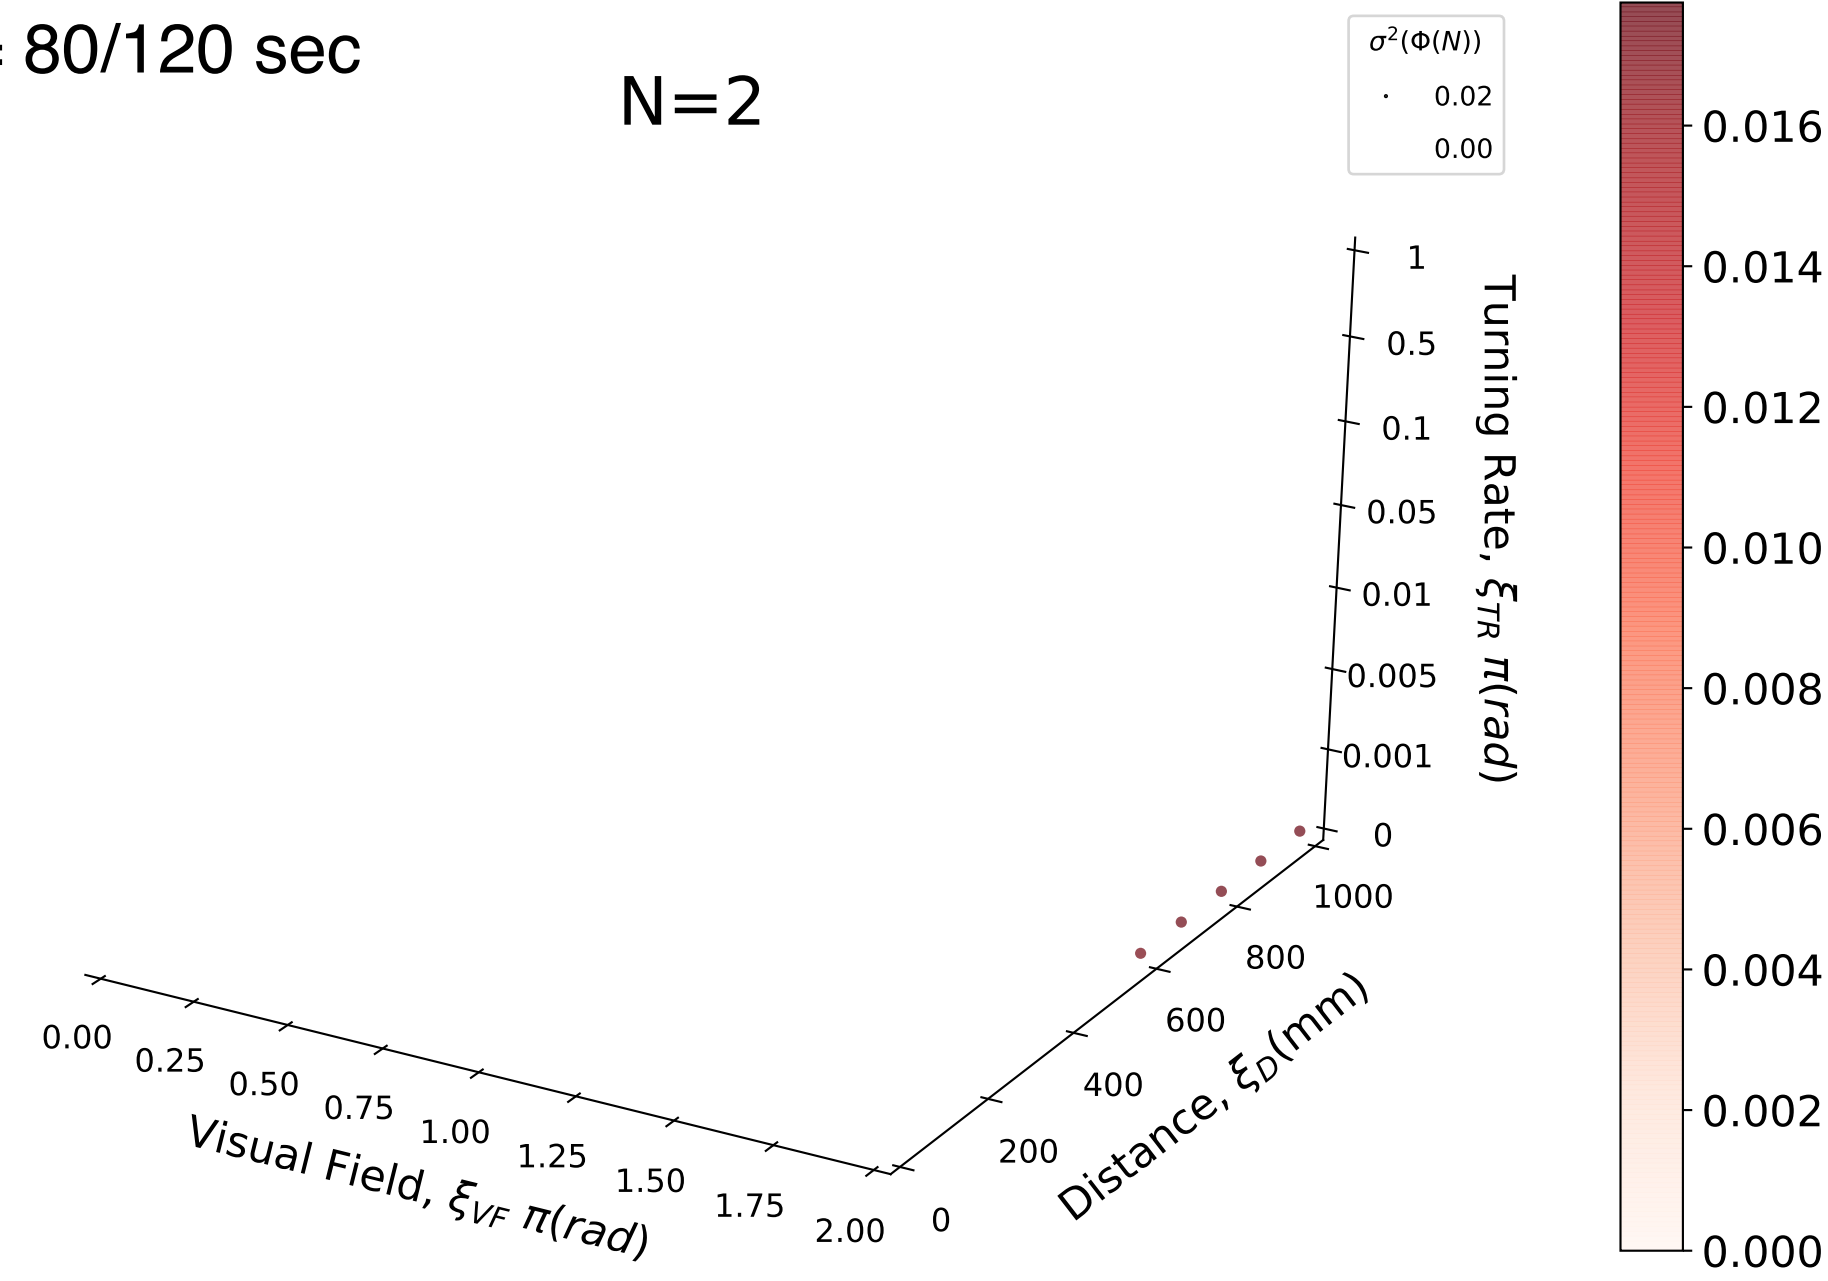

N=3

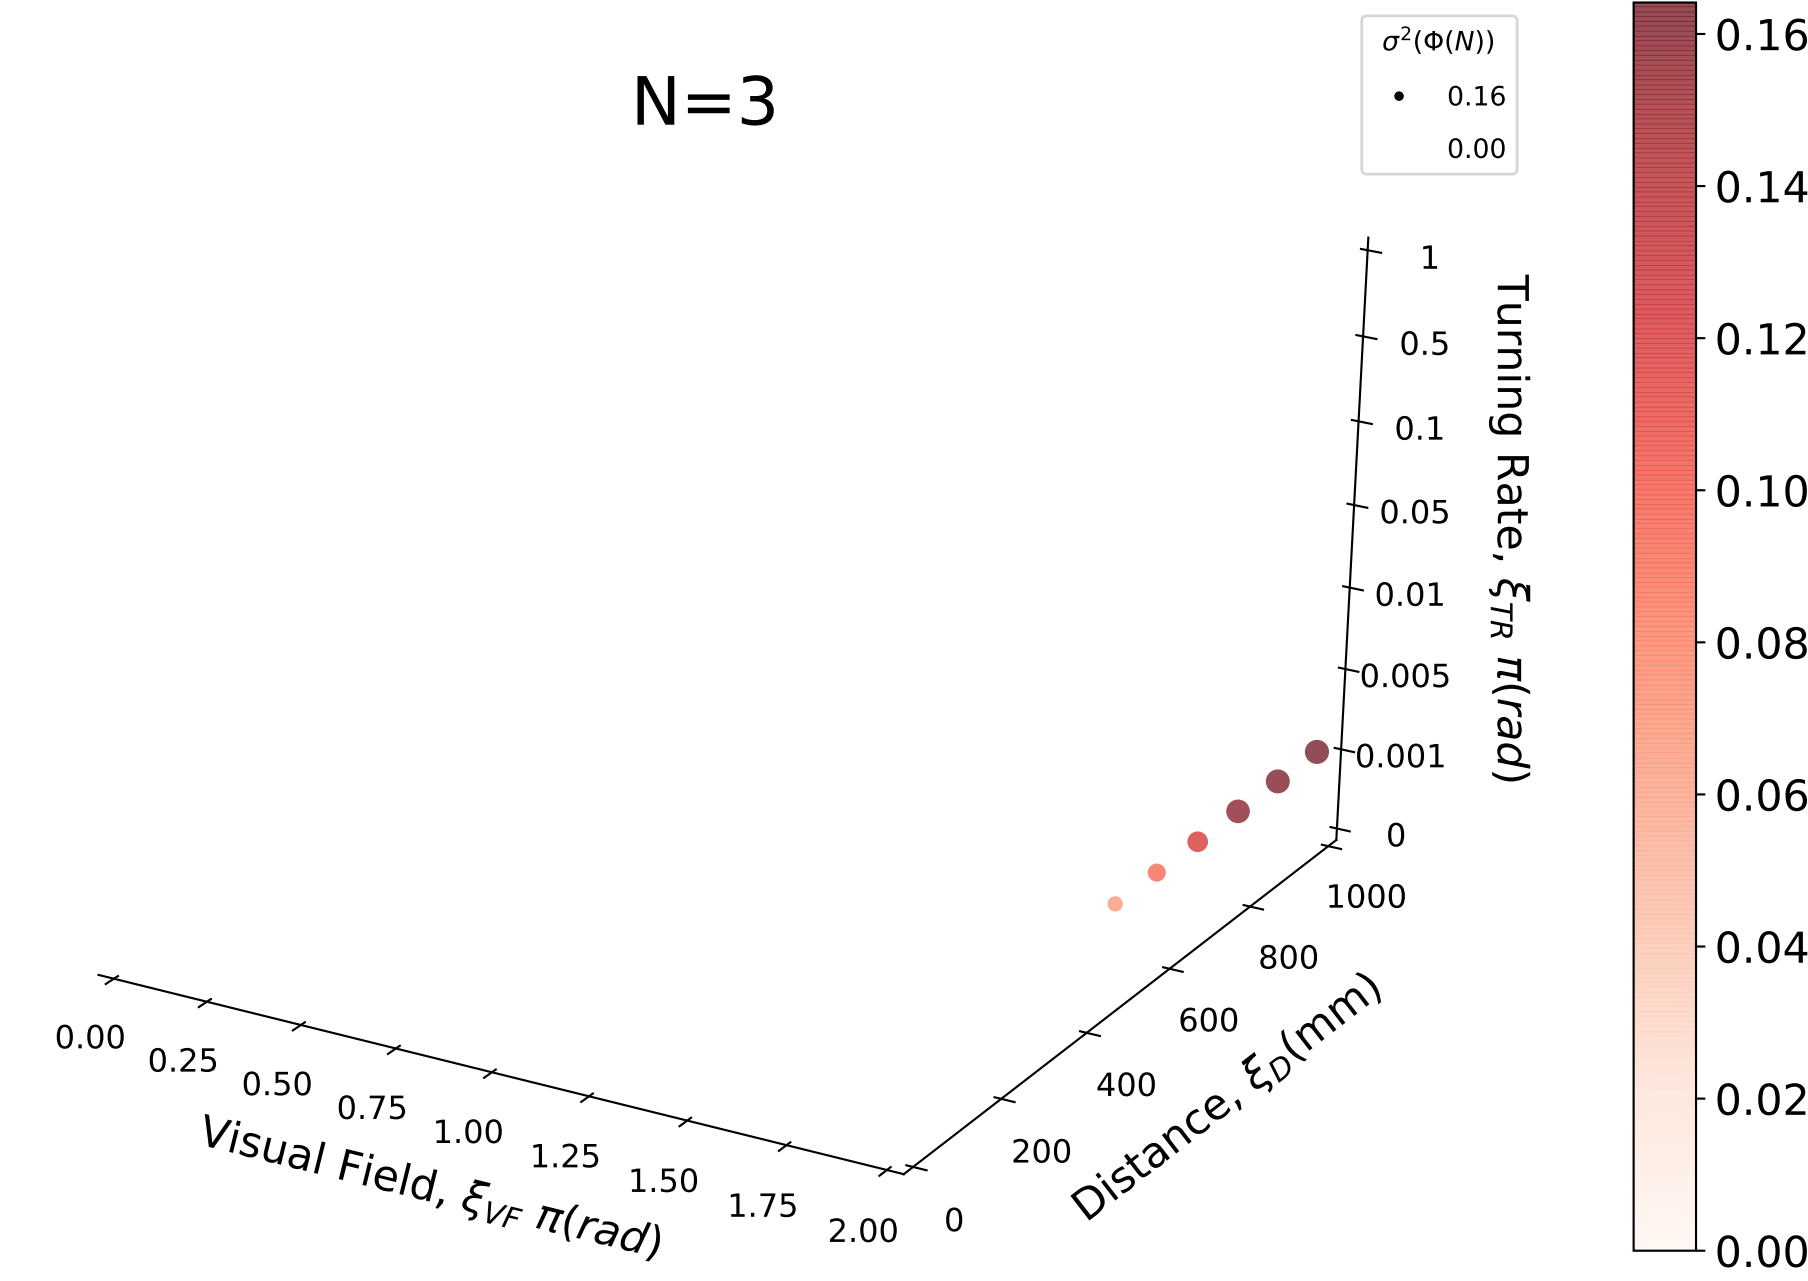

N=4

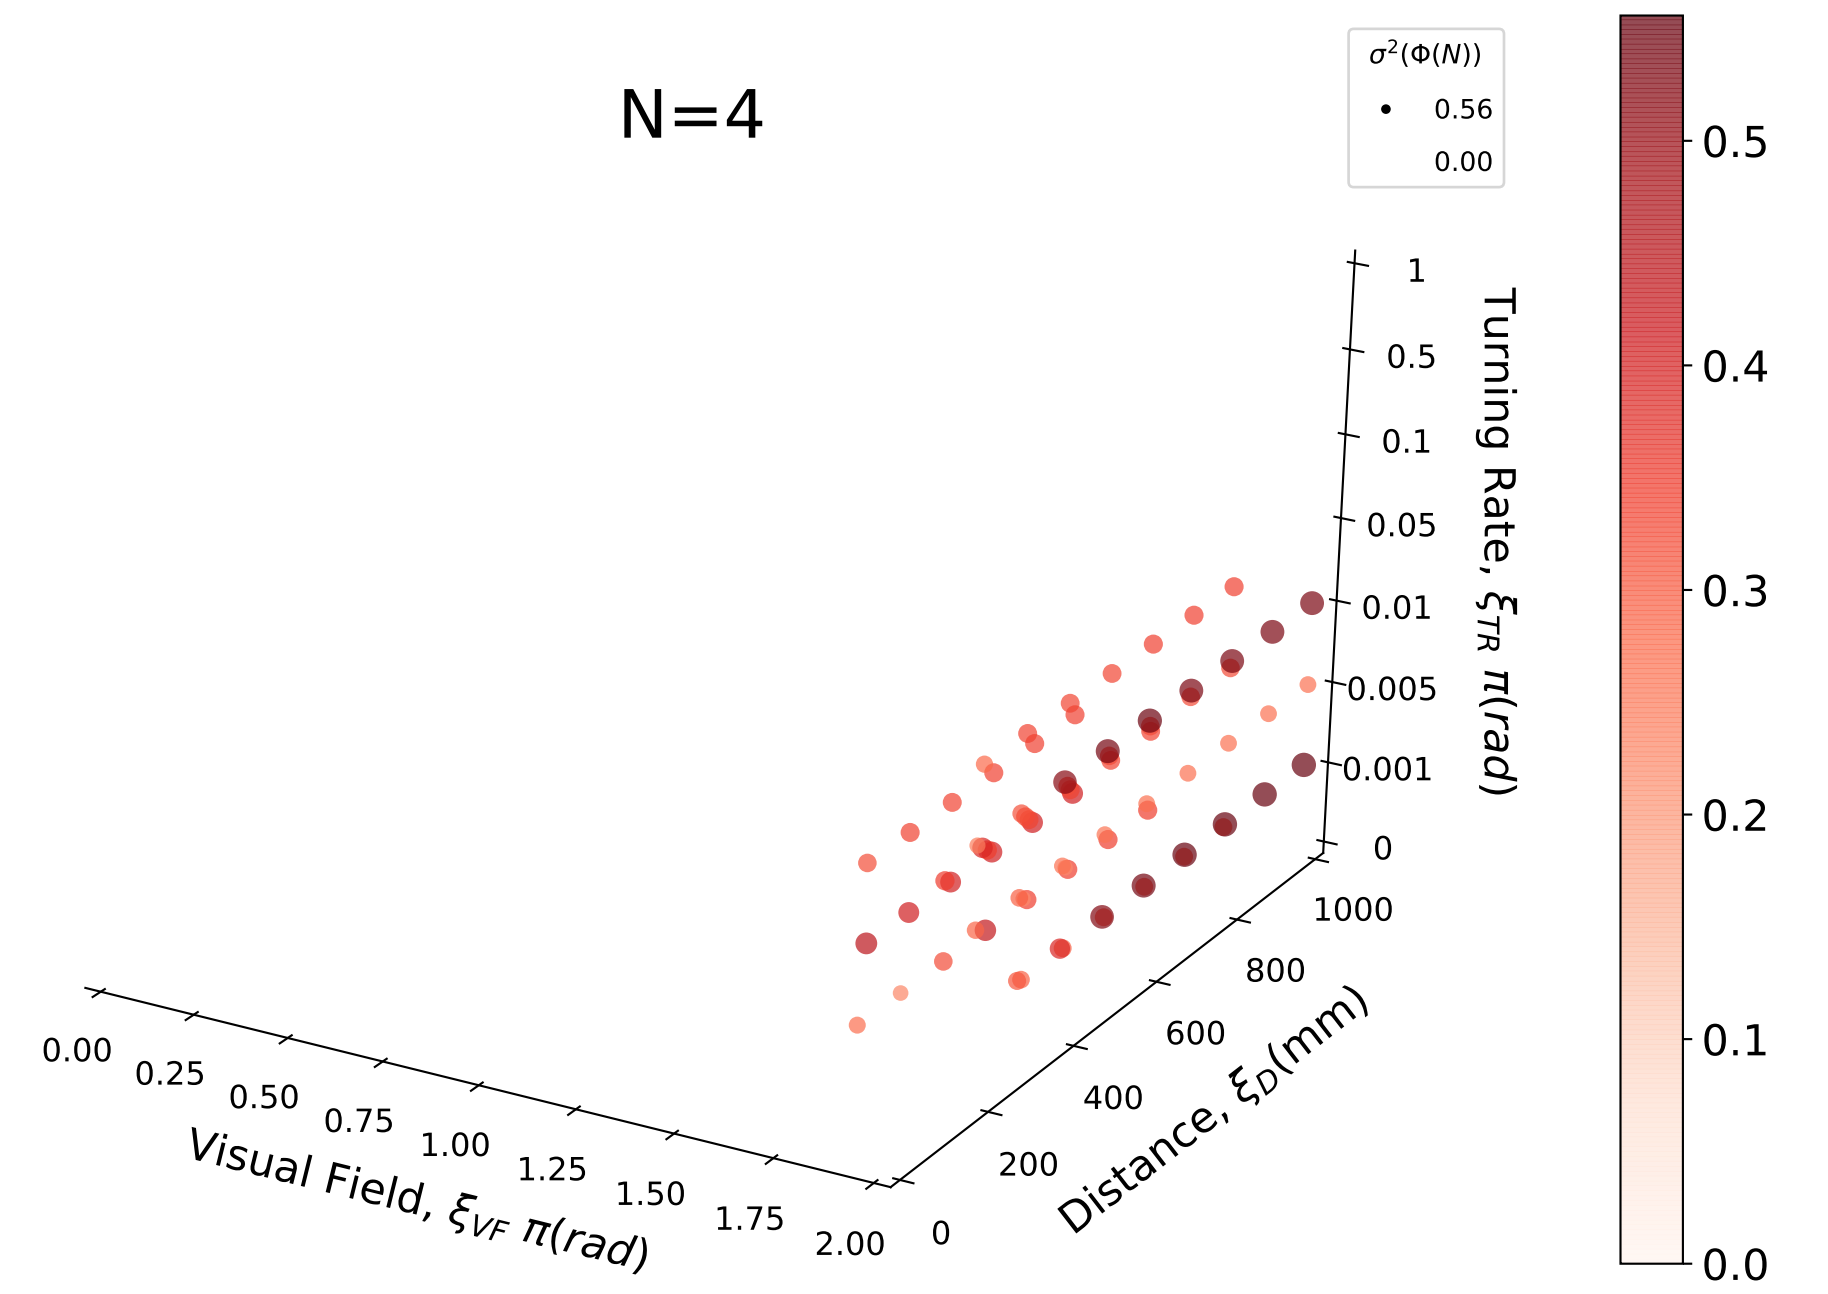

N=5

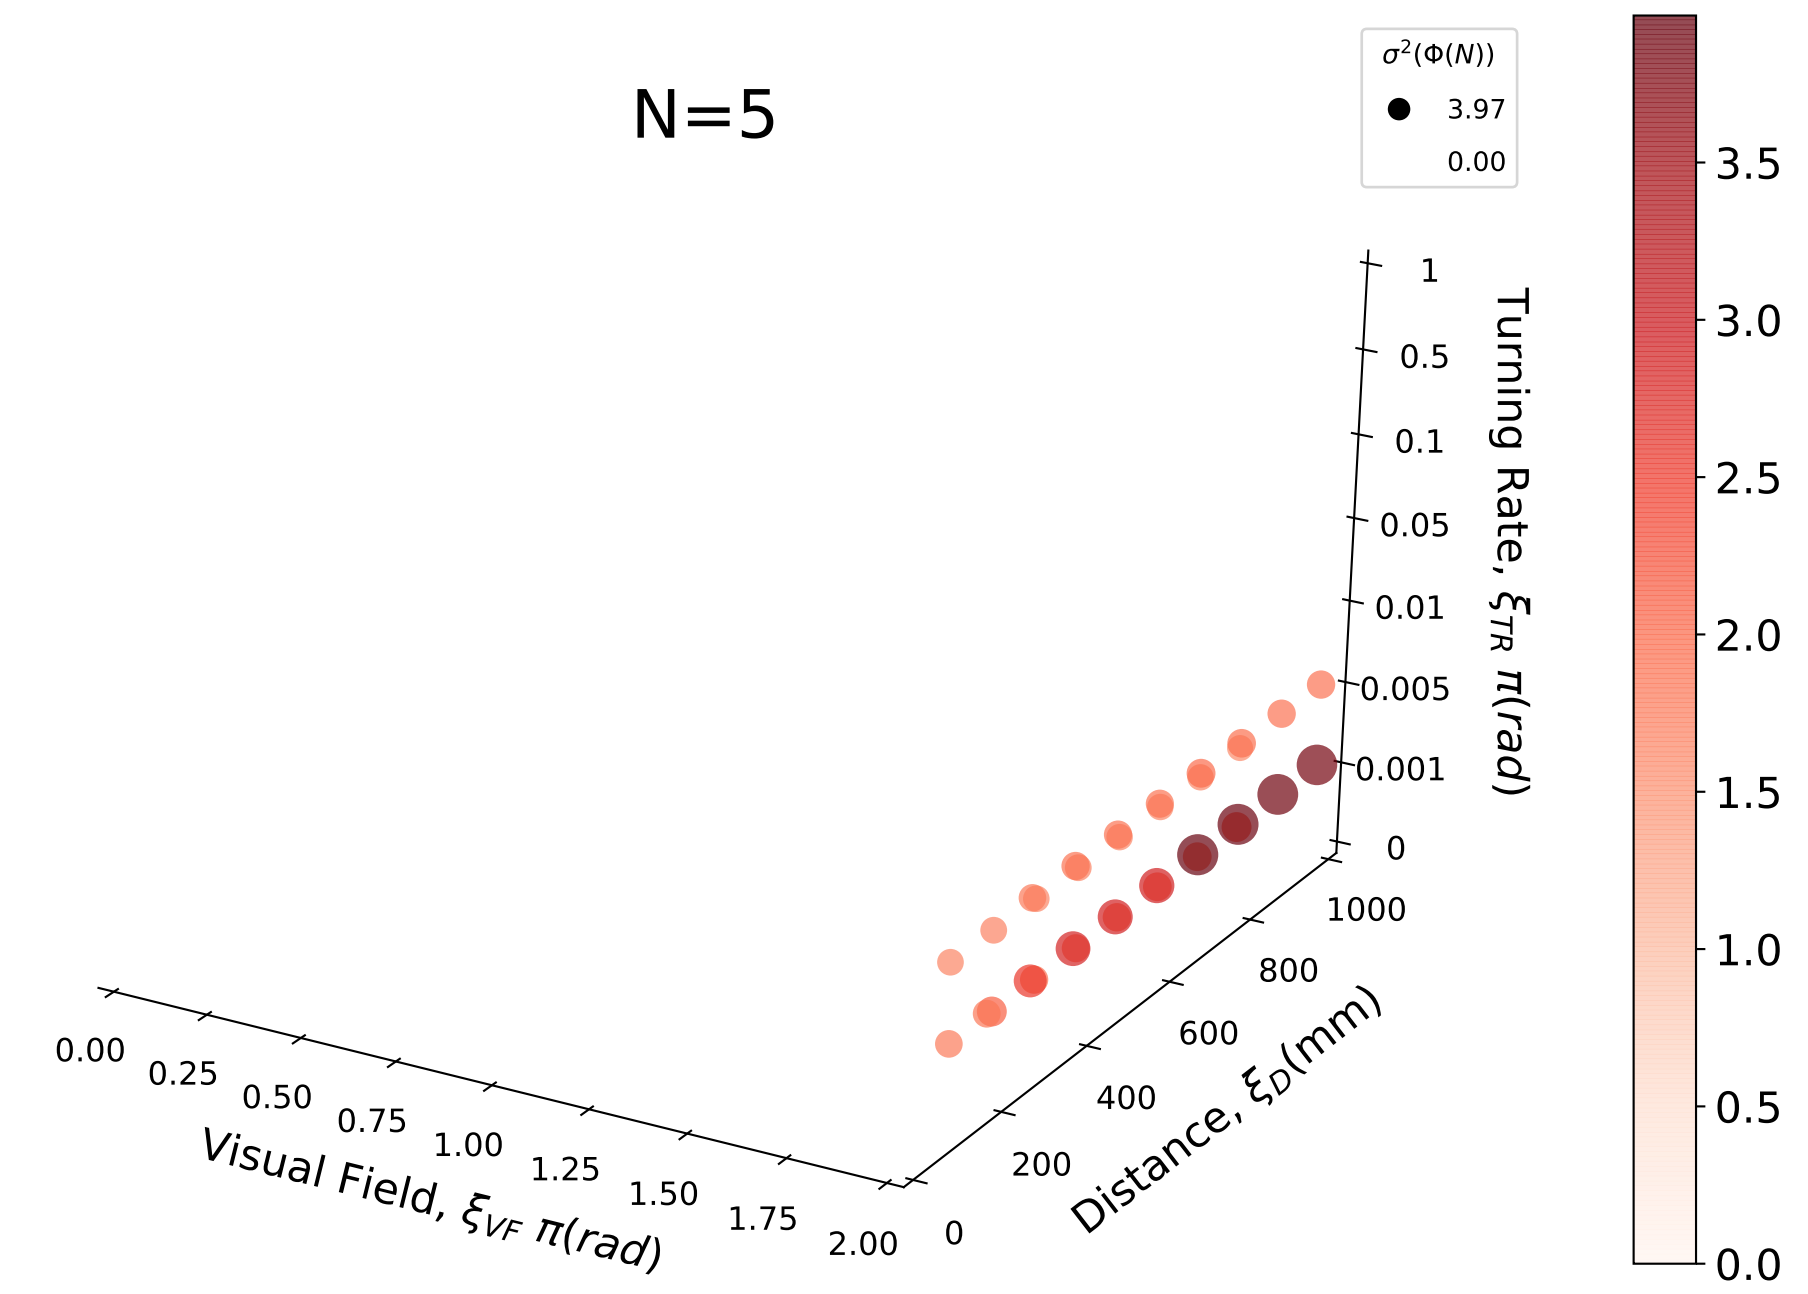

dt = 120/120 sec

N=2

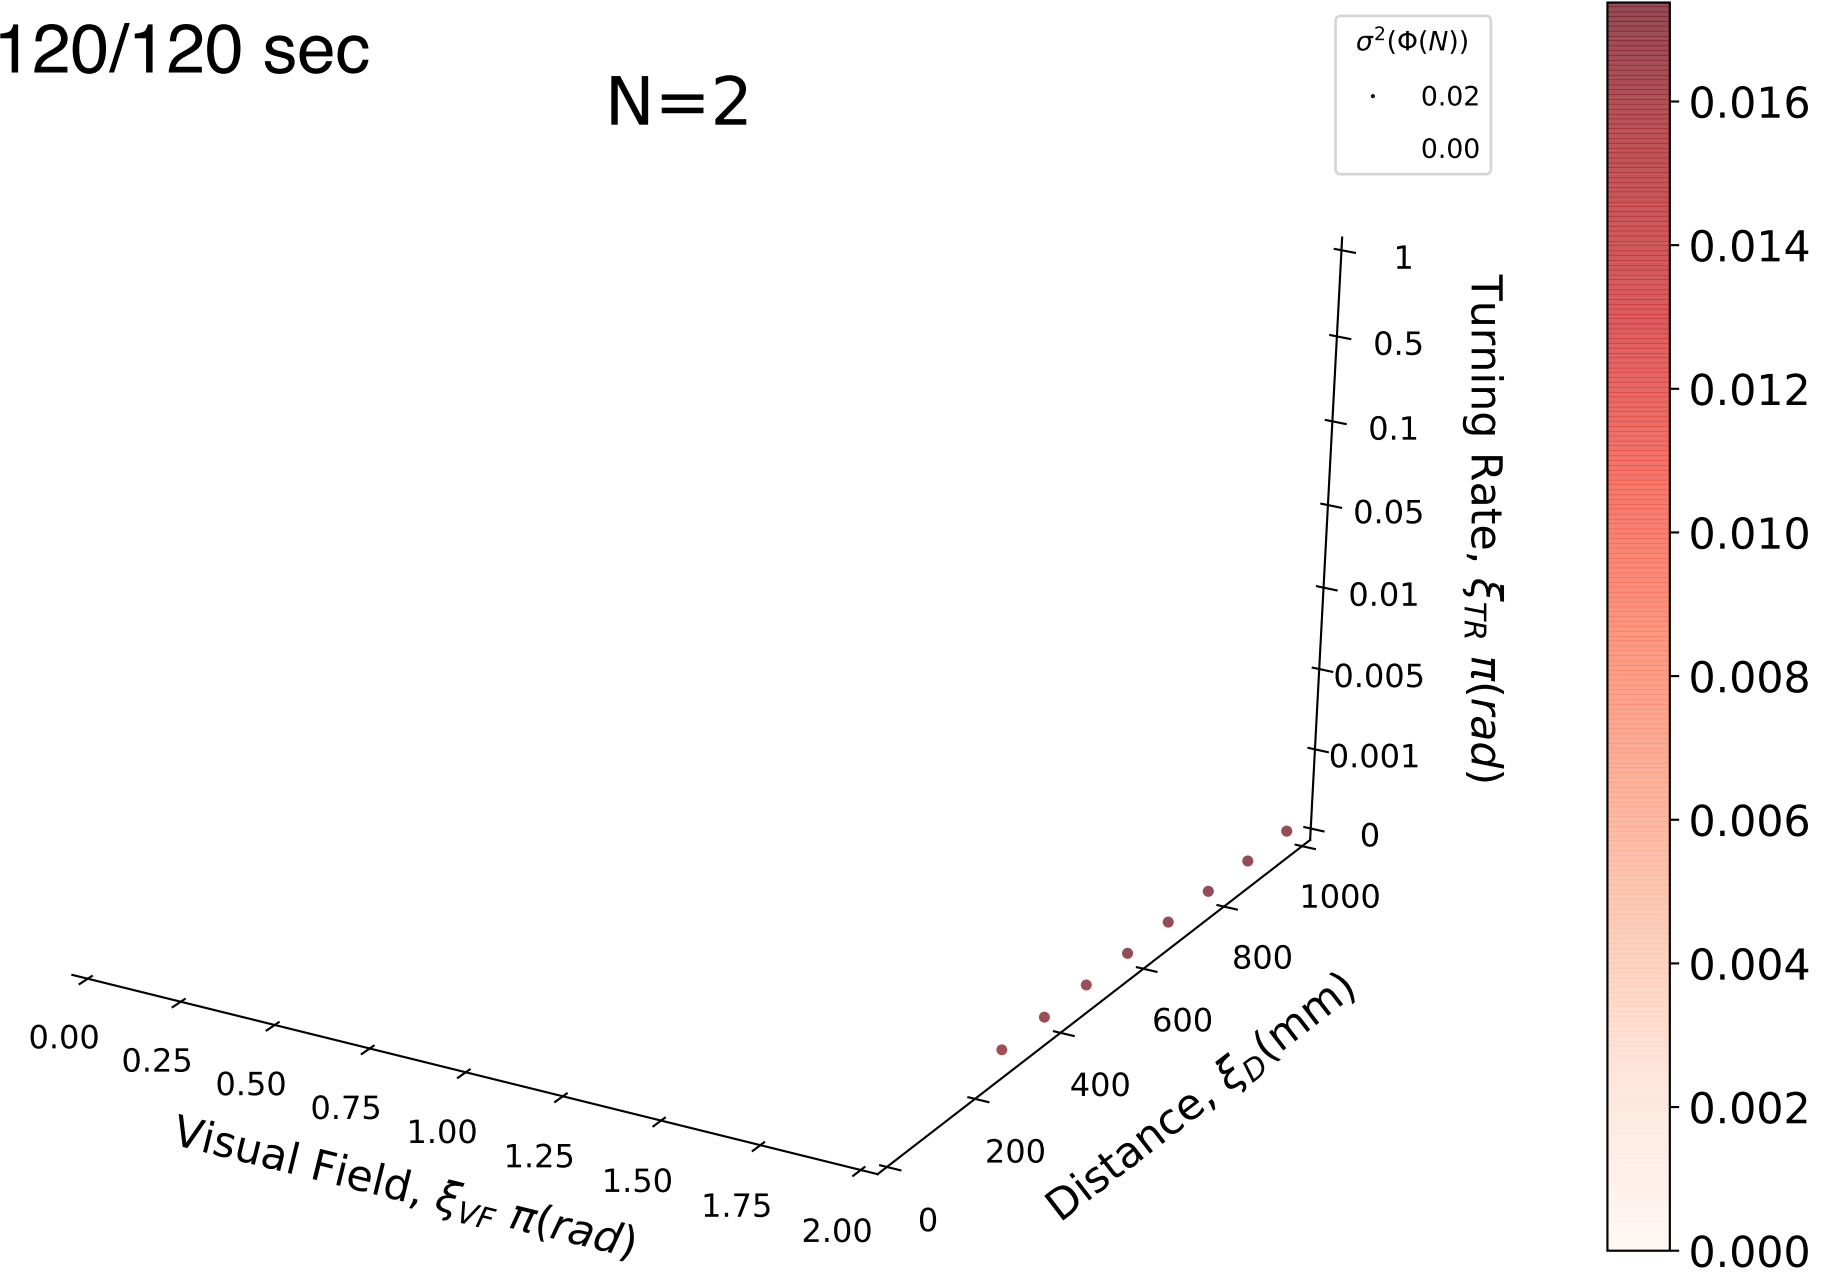

N=3

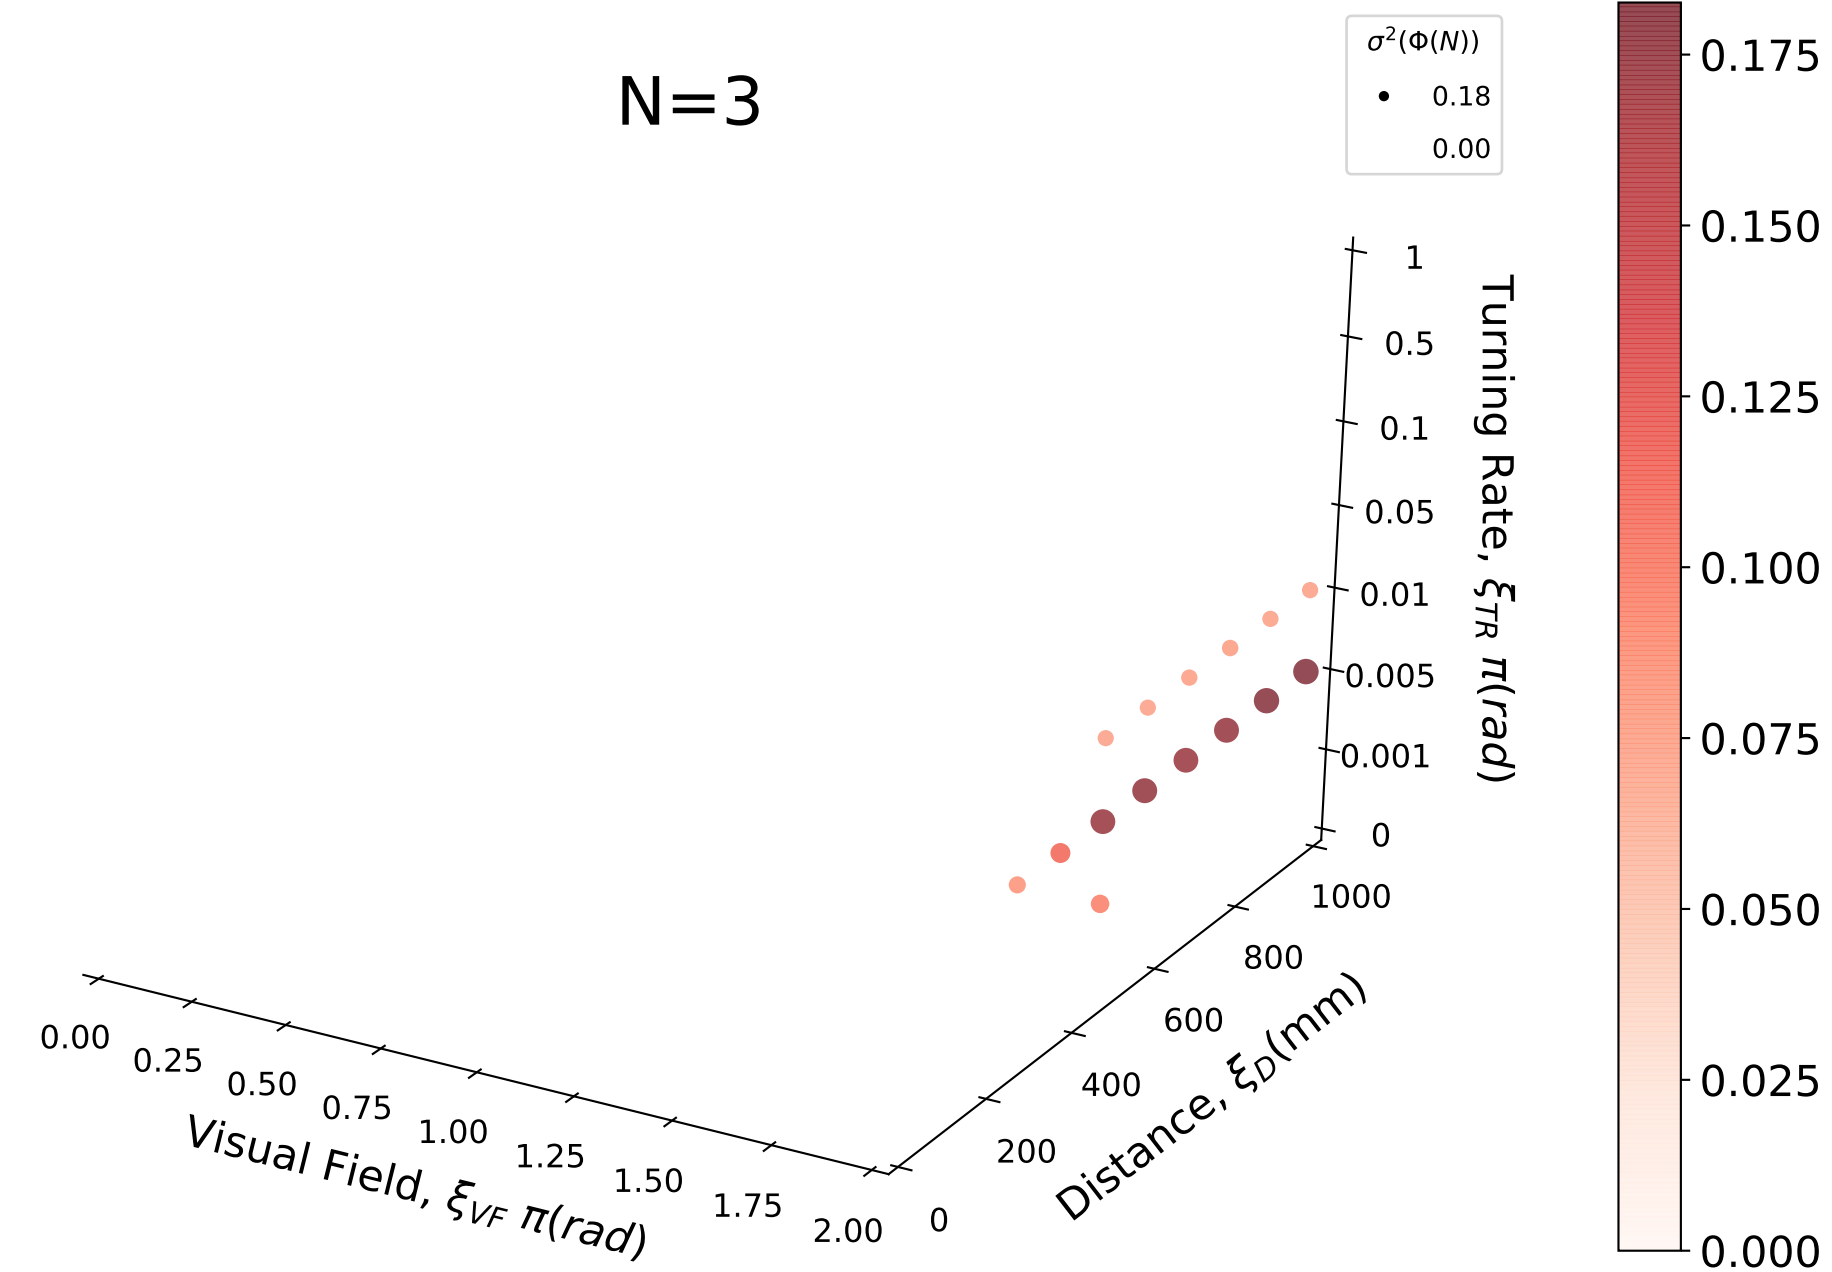

N=4

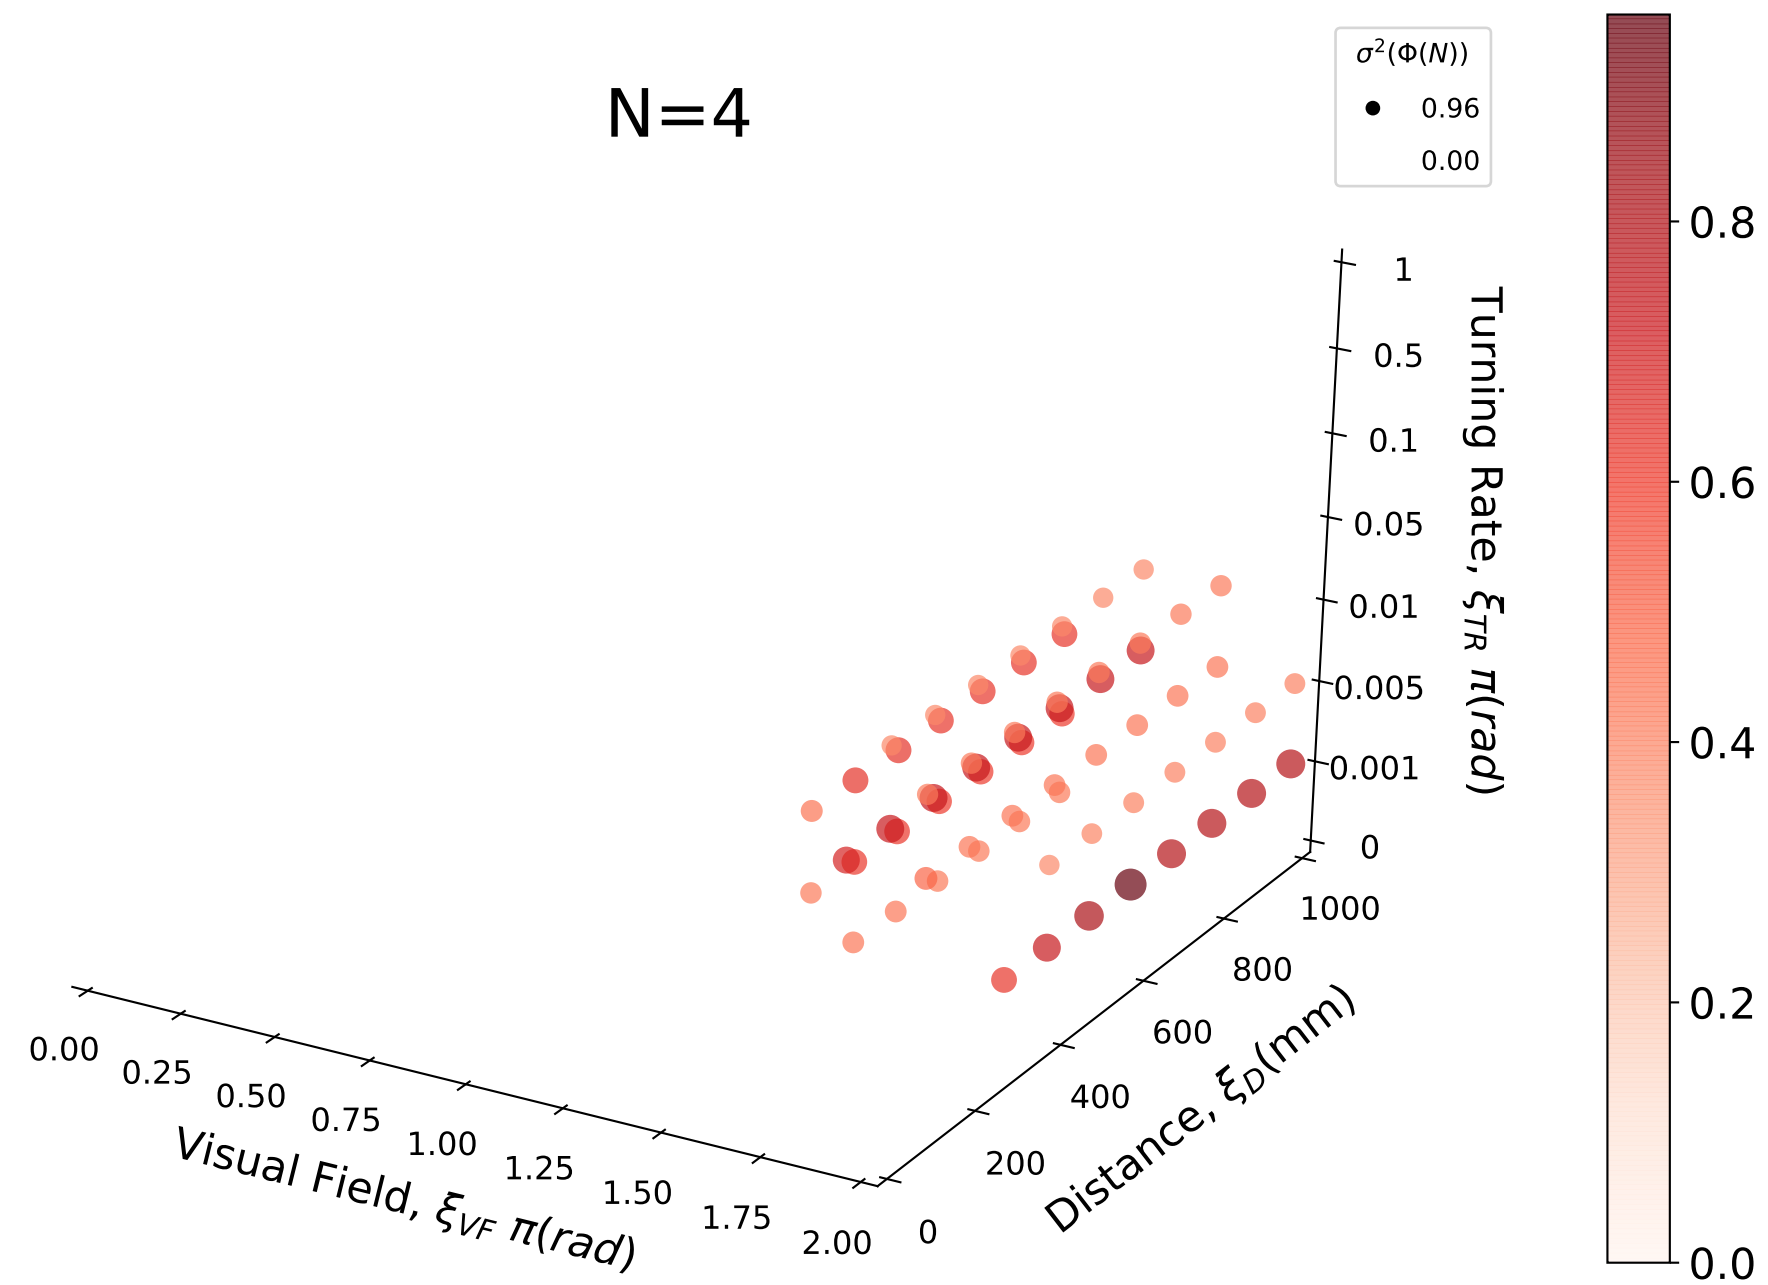

N=5

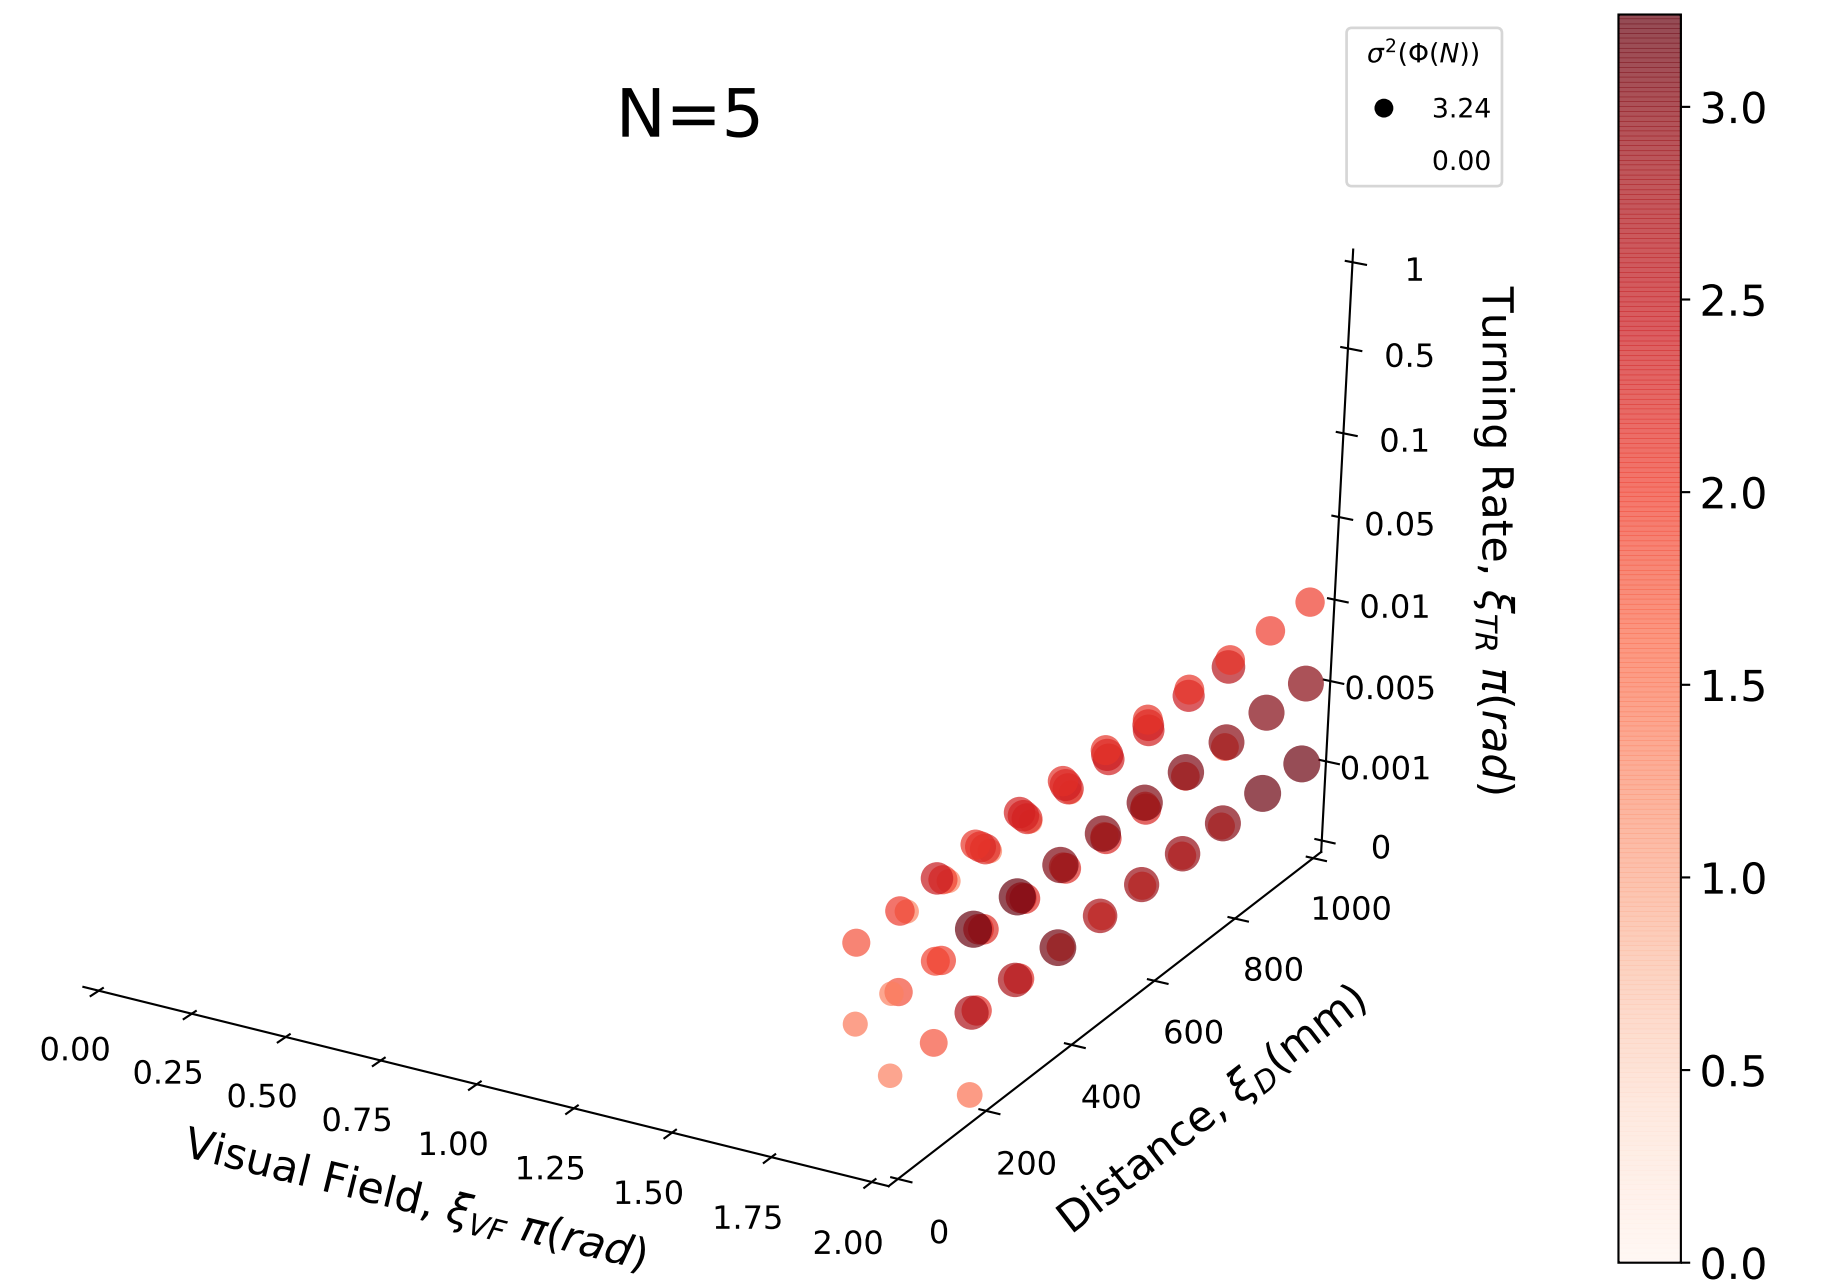

Supplement: s1 [file s1]

$$\xi_{TR}=0 \text{ (rad/step)}$$

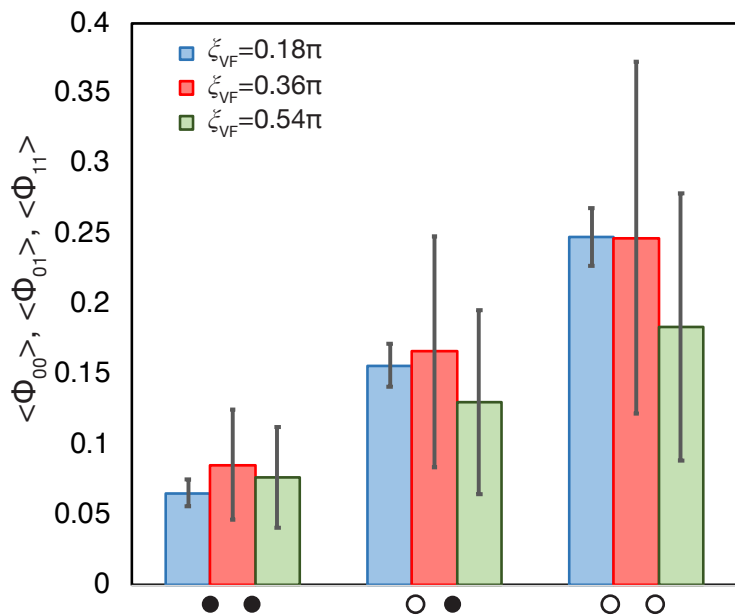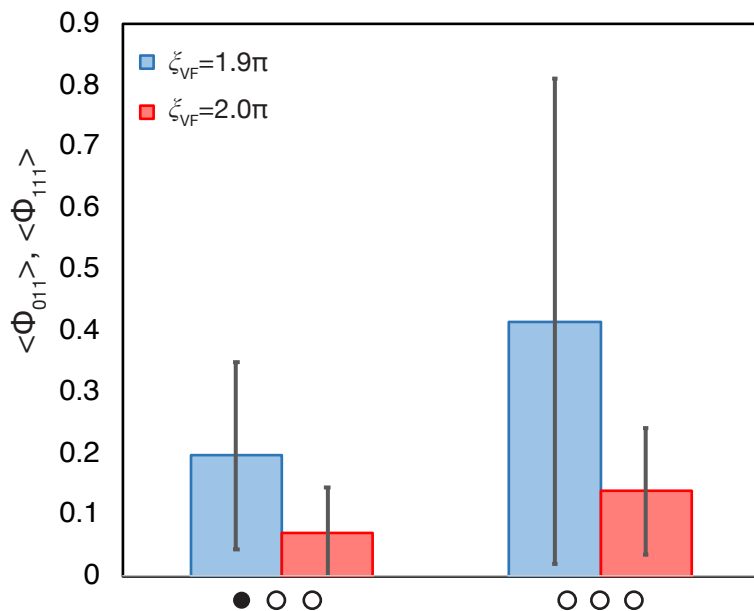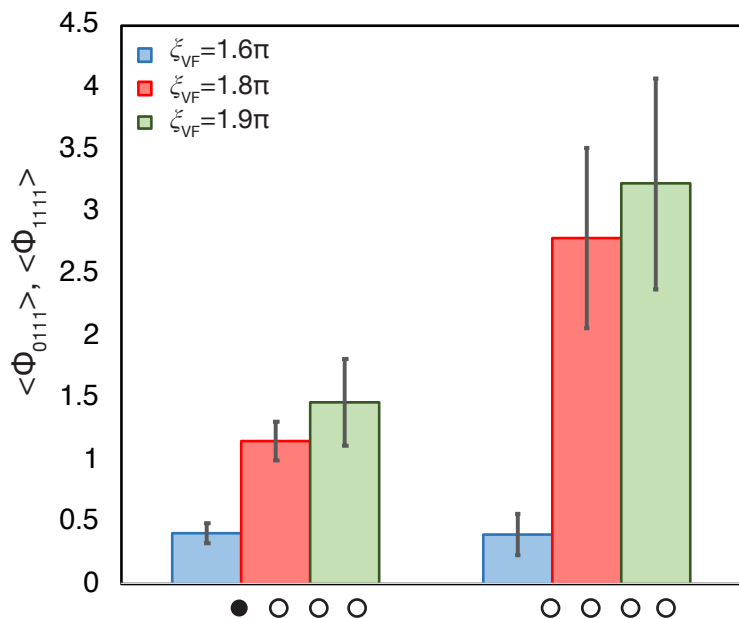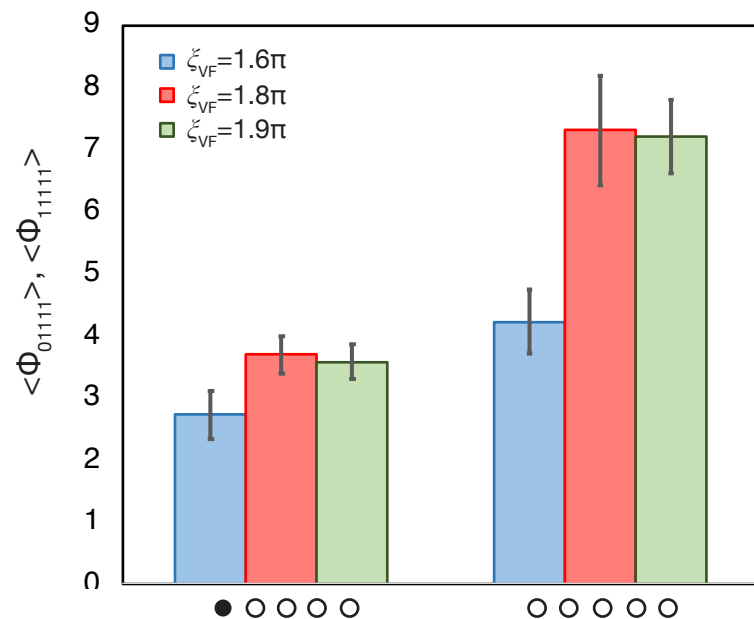

$$\xi_{TR}=0.005 \text{ (rad/step)}$$

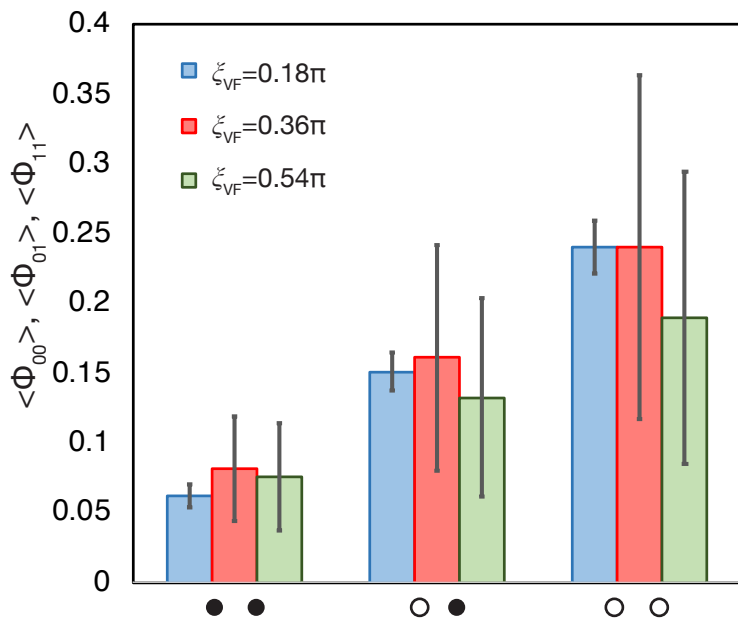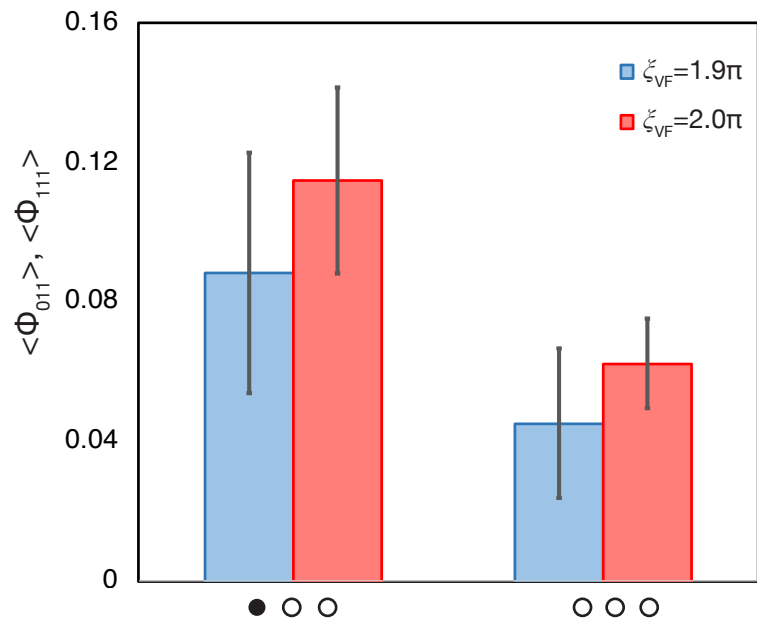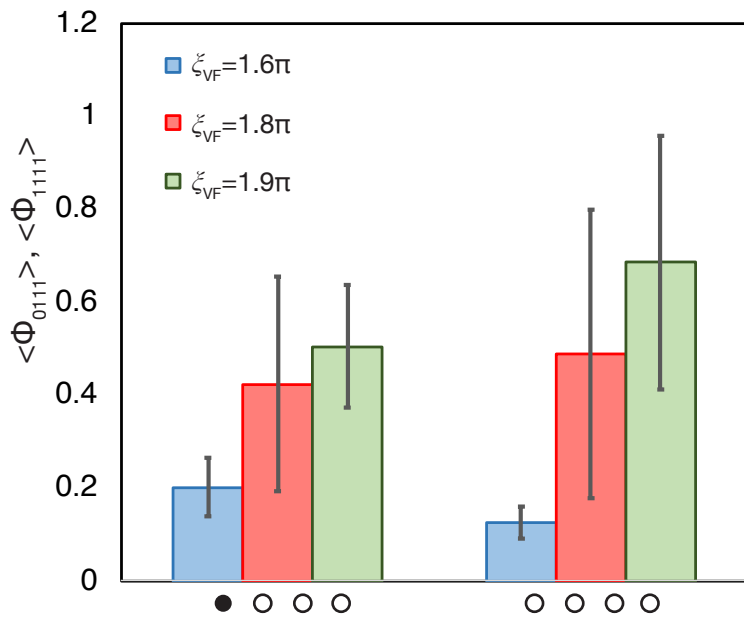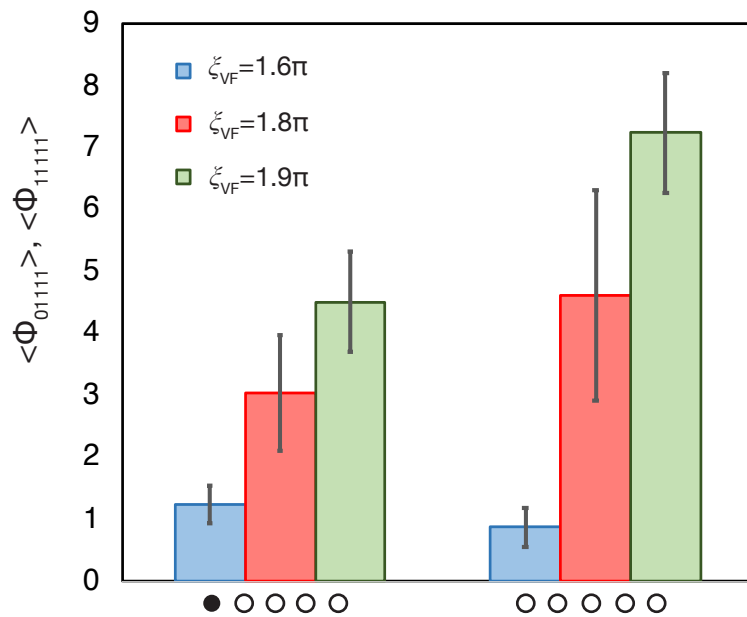

Supplement: s1 [file s1]

time : 700

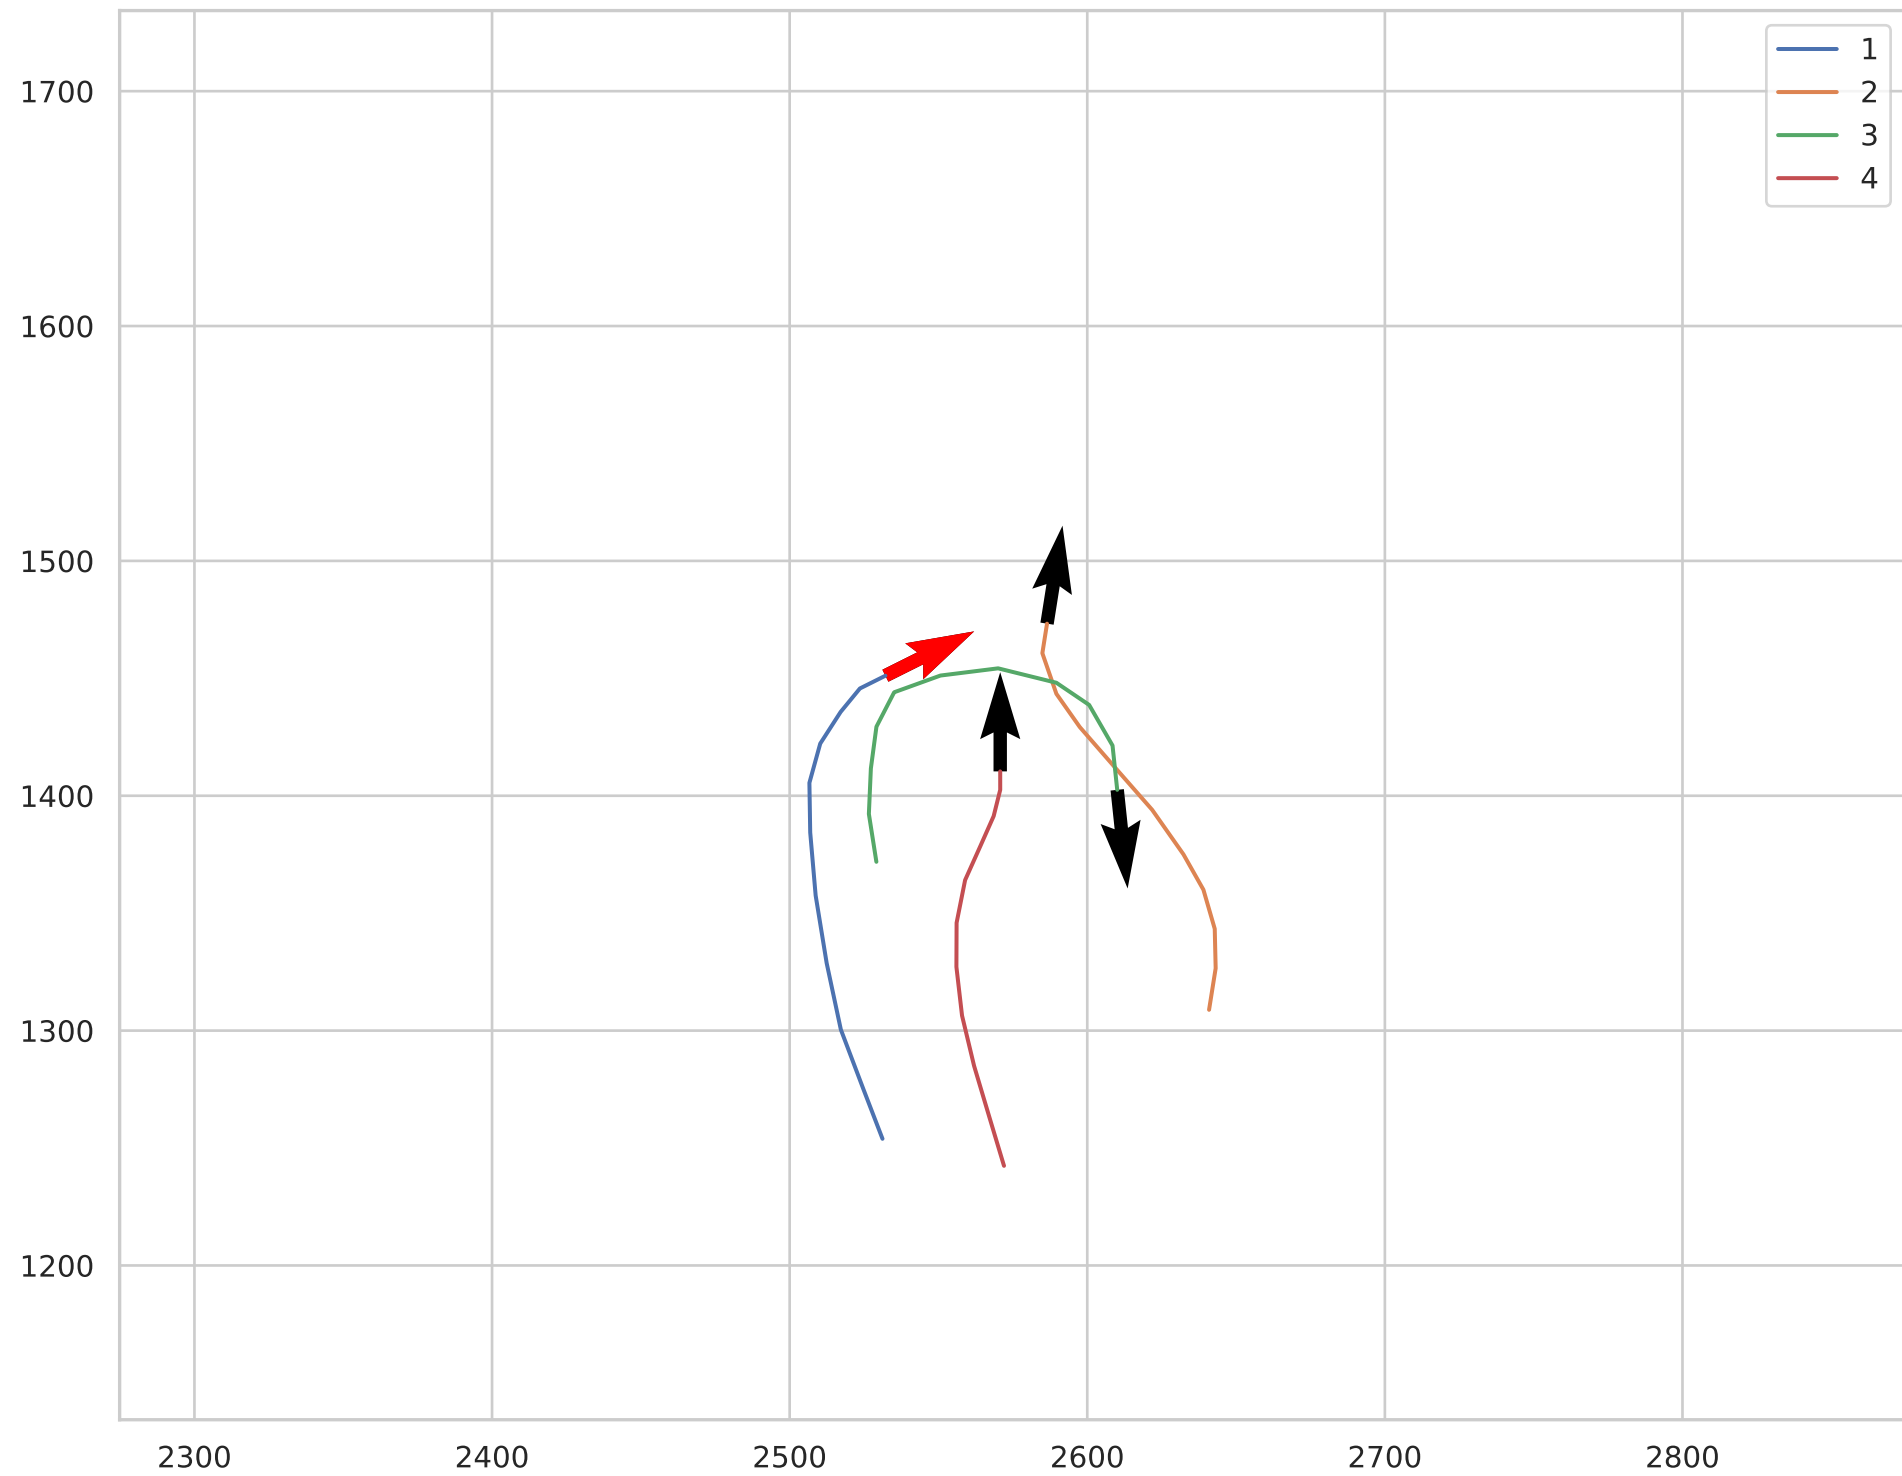

time : 1554

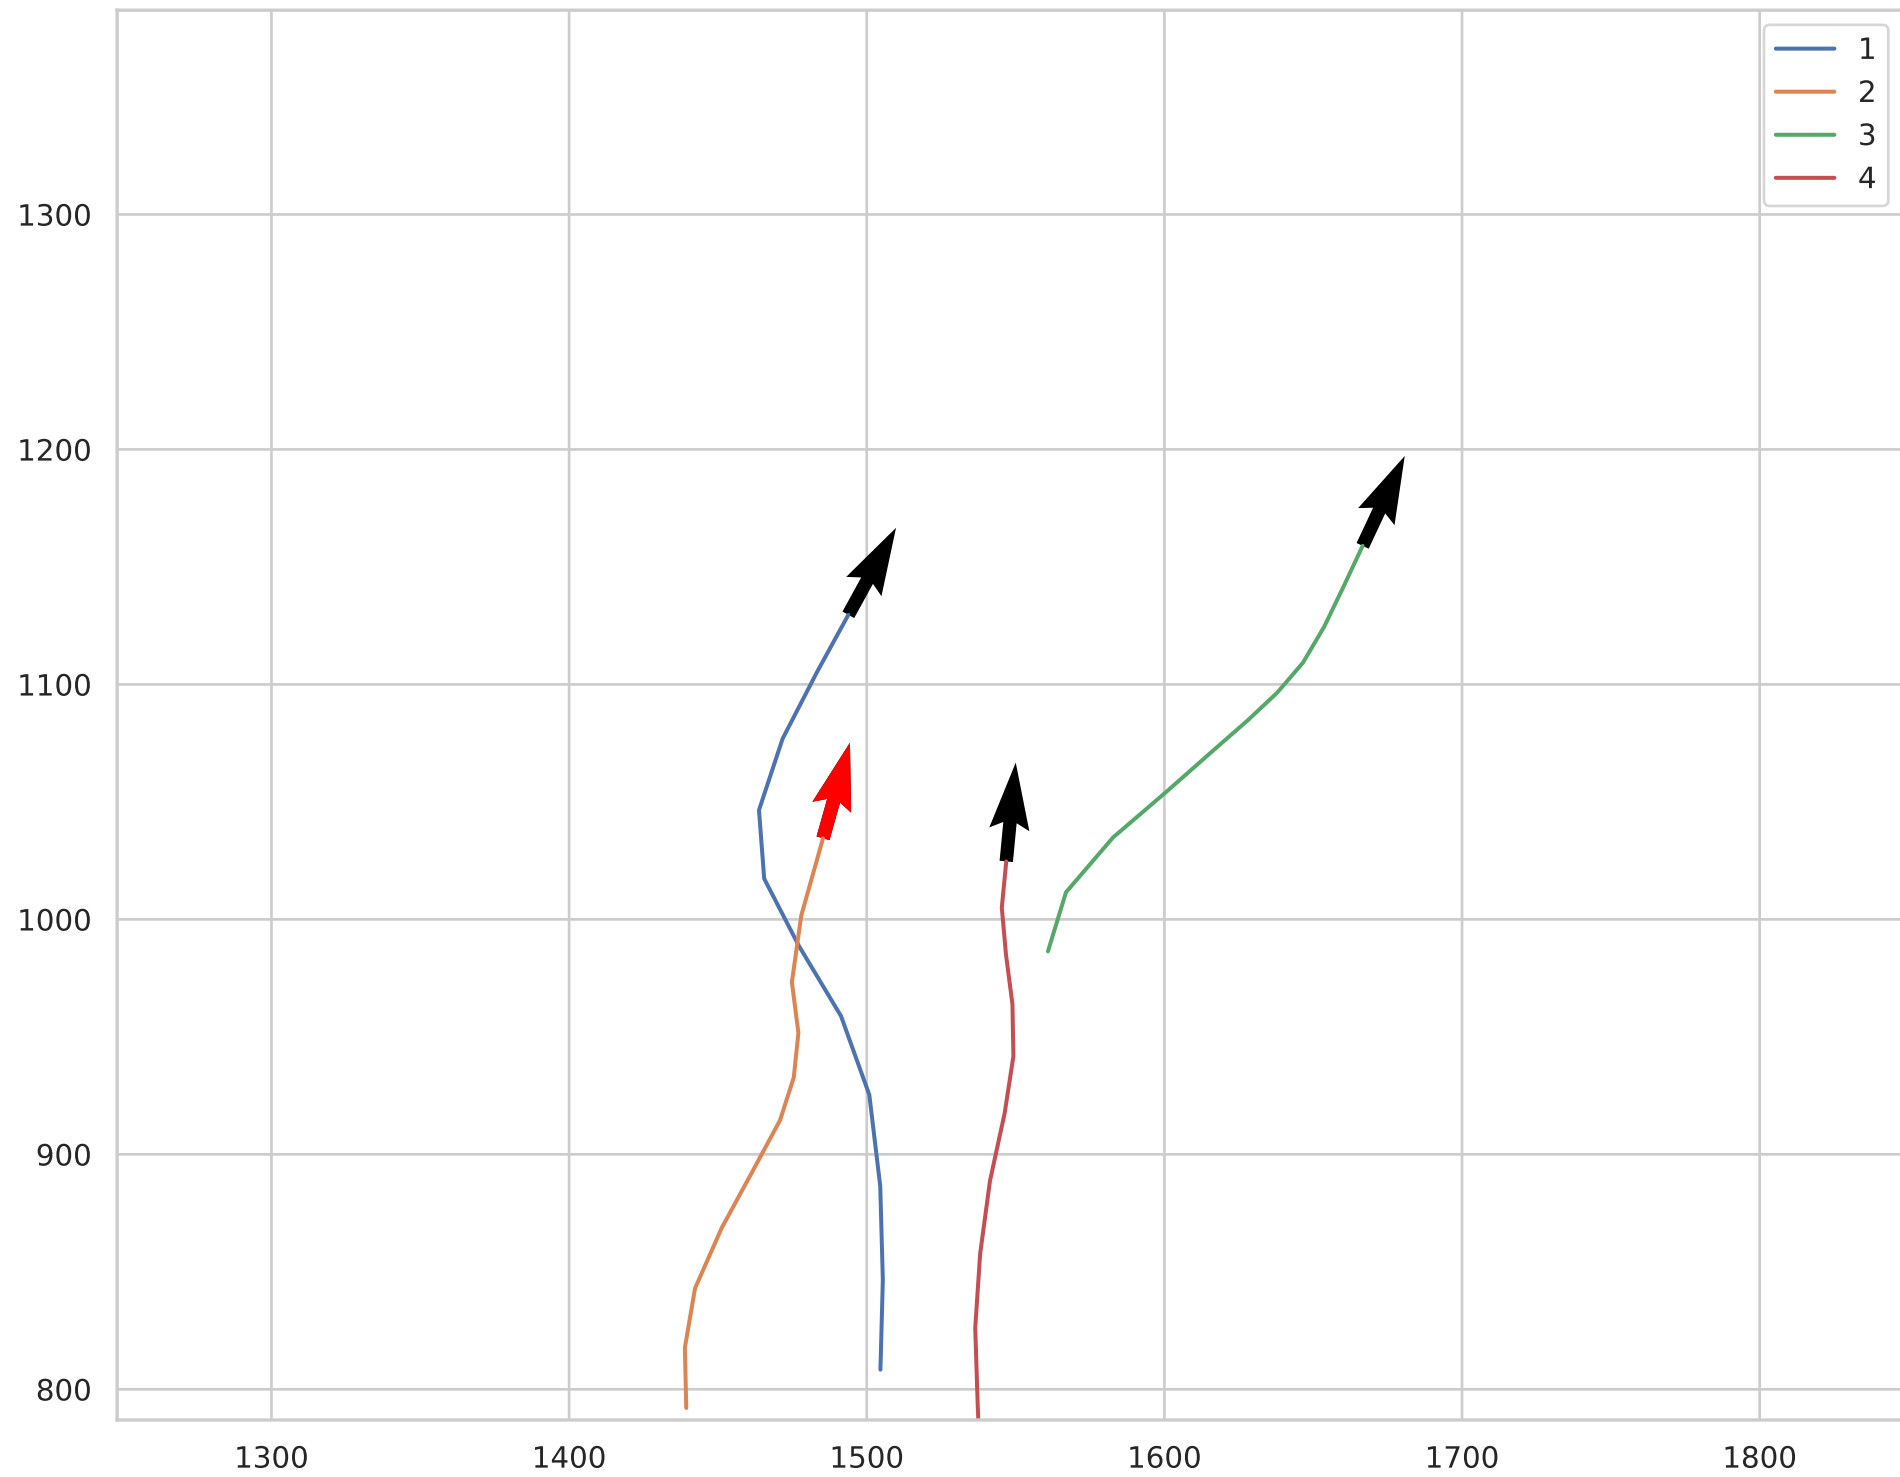

time : 3202

- 1
- 2
- 3
- 4
- 5

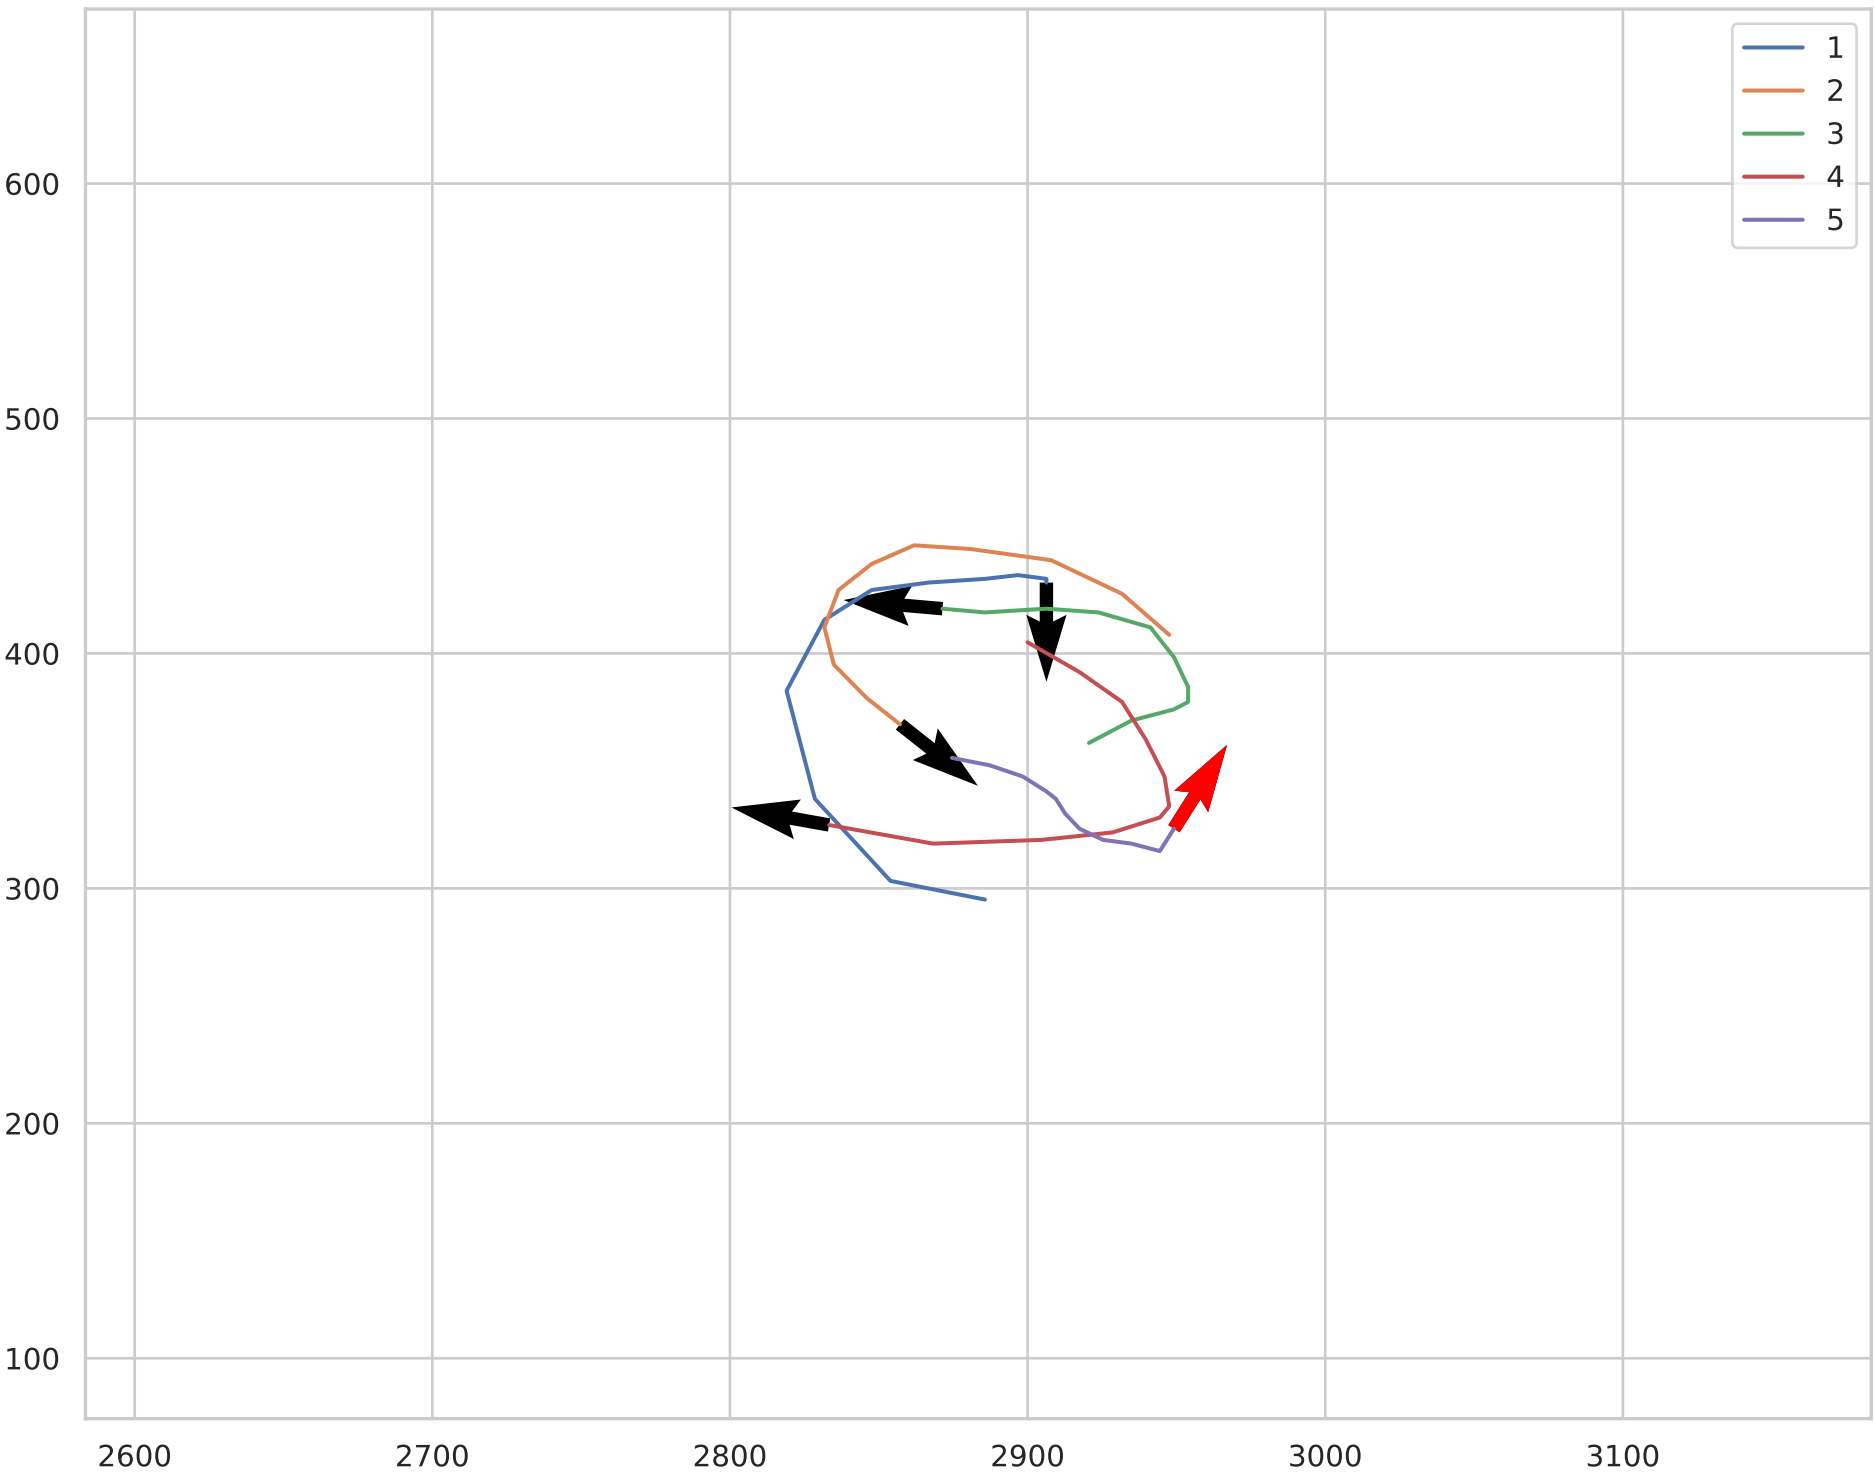

Supplement: s1 [file s1]
